# Supplementary material
Source: publisher site journal article supplement (https://www.dovepress.com/article/572586)
Supplement: Supplementary file 1 [file 572586%20Revised%20Supplementary%20Material.pdf]

**Table S1. MAGMA gene enrichment: significantly enriched genes associated with COPD and cardiovascular diseases**

| Trait_pair | GENE            | CHR | NSNPS | NPARAM | N     | P        | SYMBOL   | Pfdr              | Pbon |
|------------|-----------------|-----|-------|--------|-------|----------|----------|-------------------|------|
| COPD-HF    | ENSG00000007129 | 19  | 47    | 7      | 5E+05 | 0.049955 | CEACAM21 | 0.535473852515905 | 1    |
| COPD-HF    | ENSG00000113851 | 3   | 92    | 14     | 5E+05 | 0.049818 | CRBN     | 0.534825389633081 | 1    |
| COPD-HF    | ENSG00000221914 | 8   | 166   | 24     | 5E+05 | 0.049767 | PPP2R2A  | 0.534589225524476 | 1    |
| COPD-HF    | ENSG00000100325 | 22  | 126   | 14     | 5E+05 | 0.049748 | ASCC2    | 0.534589225524476 | 1    |
| COPD-HF    | ENSG00000135972 | 2   | 206   | 7      | 5E+05 | 0.049686 | MRPS9    | 0.534341912485414 | 1    |
| COPD-HF    | ENSG00000100523 | 14  | 154   | 10     | 5E+05 | 0.049576 | DDHD1    | 0.533470173963806 | 1    |
| COPD-HF    | ENSG00000156282 | 21  | 1     | 1      | 5E+05 | 0.049569 | CLDN17   | 0.533470173963806 | 1    |
| COPD-HF    | ENSG00000115556 | 2   | 42    | 5      | 5E+05 | 0.049508 | PLCD4    | 0.533361171244886 | 1    |
| COPD-HF    | ENSG00000205531 | 11  | 150   | 15     | 5E+05 | 0.049427 | NAP1L4   | 0.53279993625731  | 1    |
| COPD-HF    | ENSG00000250067 | 19  | 35    | 3      | 5E+05 | 0.049426 | YJEFN3   | 0.53279993625731  | 1    |
| COPD-HF    | ENSG00000080823 | 14  | 188   | 16     | 5E+05 | 0.049414 | MOK      | 0.53279993625731  | 1    |
| COPD-HF    | ENSG00000120318 | 5   | 74    | 16     | 5E+05 | 0.049376 | ARAP3    | 0.53279993625731  | 1    |
| COPD-HF    | ENSG00000169855 | 3   | 2245  | 84     | 5E+05 | 0.049365 | ROBO1    | 0.53279993625731  | 1    |
| COPD-HF    | ENSG00000110321 | 11  | 23    | 5      | 5E+05 | 0.049334 | EIF4G2   | 0.53279993625731  | 1    |
| COPD-HF    | ENSG00000187323 | 18  | 4020  | 98     | 5E+05 | 0.049304 | DCC      | 0.53279993625731  | 1    |
| COPD-HF    | ENSG00000186453 | 2   | 72    | 11     | 5E+05 | 0.049266 | FAM228A  | 0.53279993625731  | 1    |
| COPD-HF    | ENSG00000091129 | 7   | 985   | 46     | 5E+05 | 0.049204 | NRCAM    | 0.53279993625731  | 1    |
| COPD-HF    | ENSG00000231880 | 11  | 1     | 1      | 5E+05 | 0.049195 | KBTBD4   | 0.53279993625731  | 1    |
| COPD-HF    | ENSG00000243232 | 5   | 49    | 11     | 5E+05 | 0.049188 | PCDHAC2  | 0.53279993625731  | 1    |
| COPD-HF    | ENSG00000184497 | 13  | 150   | 14     | 5E+05 | 0.049184 | TMEM255B | 0.53279993625731  | 1    |
| COPD-HF    | ENSG00000176444 | 1   | 15    | 3      | 5E+05 | 0.049157 | CLK2     | 0.53279993625731  | 1    |
| COPD-HF    | ENSG00000153563 | 2   | 67    | 6      | 5E+05 | 0.04915  | CD8A     | 0.53279993625731  | 1    |
| COPD-HF    | ENSG00000181656 | 1   | 8     | 3      | 5E+05 | 0.049145 | GPR88    | 0.53279993625731  | 1    |
| COPD-HF    | ENSG00000064607 | 19  | 75    | 8      | 5E+05 | 0.049118 | SUGP2    | 0.53279993625731  | 1    |
| COPD-HF    | ENSG00000162039 | 16  | 318   | 6      | 5E+05 | 0.049096 | MEIOB    | 0.53279993625731  | 1    |
| COPD-HF    | ENSG00000170185 | 4   | 75    | 6      | 5E+05 | 0.049086 | USP38    | 0.53279993625731  | 1    |
| COPD-HF    | ENSG00000161016 | 8   | 4     | 2      | 5E+05 | 0.049035 | RPL8     | 0.53279993625731  | 1    |
| COPD-HF    | ENSG00000111885 | 6   | 616   | 25     | 5E+05 | 0.048953 | MAN1A1   | 0.53279993625731  | 1    |
| COPD-HF    | ENSG00000172375 | 11  | 41    | 8      | 5E+05 | 0.048945 | C2CD2L   | 0.53279993625731  | 1    |
| COPD-HF    | ENSG00000016082 | 5   | 18    | 7      | 5E+05 | 0.048925 | ISL1     | 0.53279993625731  | 1    |
| COPD-HF    | ENSG00000174442 | 15  | 129   | 15     | 5E+05 | 0.048911 | ZWILCH   | 0.53279993625731  | 1    |

|         |                 |    |      |     |       |          |              |                   |   |
|---------|-----------------|----|------|-----|-------|----------|--------------|-------------------|---|
| COPD-HF | ENSG00000140263 | 15 | 50   | 10  | 5E+05 | 0.04889  | SORD         | 0.53279993625731  | 1 |
| COPD-HF | ENSG00000035681 | 8  | 130  | 11  | 5E+05 | 0.048869 | NSMAF        | 0.53279993625731  | 1 |
| COPD-HF | ENSG00000072134 | 17 | 63   | 9   | 5E+05 | 0.048795 | EPN2         | 0.53279993625731  | 1 |
| COPD-HF | ENSG00000173421 | 3  | 67   | 8   | 5E+05 | 0.048757 | CCDC36       | 0.53279993625731  | 1 |
| COPD-HF | ENSG00000138777 | 4  | 360  | 17  | 5E+05 | 0.048674 | PPA2         | 0.53279993625731  | 1 |
| COPD-HF | ENSG00000139970 | 14 | 451  | 22  | 5E+05 | 0.048642 | RTN1         | 0.53279993625731  | 1 |
| COPD-HF | ENSG00000003756 | 3  | 28   | 6   | 5E+05 | 0.04859  | RBM5         | 0.53279993625731  | 1 |
| COPD-HF | ENSG00000068784 | 2  | 608  | 26  | 5E+05 | 0.048551 | SRBD1        | 0.53270272797619  | 1 |
| COPD-HF | ENSG00000114302 | 3  | 64   | 9   | 5E+05 | 0.048457 | PRKAR2A      | 0.531988017272186 | 1 |
| COPD-HF | ENSG00000162413 | 1  | 42   | 9   | 5E+05 | 0.048445 | KLHL21       | 0.531988017272186 | 1 |
| COPD-HF | ENSG00000183765 | 22 | 118  | 17  | 5E+05 | 0.048441 | CHEK2        | 0.531988017272186 | 1 |
| COPD-HF | ENSG00000198398 | 3  | 66   | 14  | 5E+05 | 0.048435 | TMEM207      | 0.531988017272186 | 1 |
| COPD-HF | ENSG00000125538 | 2  | 14   | 4   | 5E+05 | 0.048221 | IL1B         | 0.530661309253731 | 1 |
| COPD-HF | ENSG00000109680 | 4  | 162  | 8   | 5E+05 | 0.048216 | TBC1D19      | 0.530661309253731 | 1 |
| COPD-HF | ENSG00000257767 | 12 | 23   | 3   | 5E+05 | 0.048136 | RP11-162P23  | 0.530359167961745 | 1 |
| COPD-HF | ENSG00000182326 | 12 | 124  | 11  | 5E+05 | 0.048012 | C1S          | 0.529309327751196 | 1 |
| COPD-HF | ENSG00000205436 | 14 | 25   | 5   | 5E+05 | 0.047916 | EXOC3L4      | 0.528567102333932 | 1 |
| COPD-HF | ENSG00000159761 | 16 | 1    | 1   | 5E+05 | 0.04791  | C16orf86     | 0.528567102333932 | 1 |
| COPD-HF | ENSG00000197016 | 19 | 62   | 6   | 5E+05 | 0.047905 | ZNF470       | 0.528567102333932 | 1 |
| COPD-HF | ENSG00000146374 | 6  | 130  | 10  | 5E+05 | 0.047866 | RSPO3        | 0.528567102333932 | 1 |
| COPD-HF | ENSG00000143994 | 2  | 8    | 2   | 5E+05 | 0.047856 | ABHD1        | 0.528567102333932 | 1 |
| COPD-HF | ENSG00000255582 | 14 | 2    | 1   | 5E+05 | 0.047815 | OR10G2       | 0.528567102333932 | 1 |
| COPD-HF | ENSG00000180113 | 6  | 11   | 5   | 5E+05 | 0.047793 | TDRD6        | 0.528567102333932 | 1 |
| COPD-HF | ENSG00000189079 | 12 | 122  | 16  | 5E+05 | 0.047779 | ARID2        | 0.528567102333932 | 1 |
| COPD-HF | ENSG00000078304 | 14 | 394  | 38  | 5E+05 | 0.047761 | PPP2R5C      | 0.528567102333932 | 1 |
| COPD-HF | ENSG00000138399 | 2  | 109  | 17  | 5E+05 | 0.047755 | FASTKD1      | 0.528567102333932 | 1 |
| COPD-HF | ENSG00000259164 | 14 | 370  | 37  | 5E+05 | 0.047732 | RP11-463C8.2 | 0.528567102333932 | 1 |
| COPD-HF | ENSG00000244537 | 17 | 5    | 2   | 5E+05 | 0.047698 | KRTAP4-2     | 0.528567102333932 | 1 |
| COPD-HF | ENSG00000136816 | 9  | 15   | 3   | 5E+05 | 0.047663 | TOR1B        | 0.528567102333932 | 1 |
| COPD-HF | ENSG00000123178 | 13 | 40   | 6   | 5E+05 | 0.047608 | SPRYD7       | 0.528567102333932 | 1 |
| COPD-HF | ENSG00000188580 | 6  | 2555 | 186 | 5E+05 | 0.047591 | NKAIN2       | 0.528567102333932 | 1 |
| COPD-HF | ENSG00000168116 | 6  | 6    | 2   | 5E+05 | 0.04752  | KIAA1586     | 0.528567102333932 | 1 |
| COPD-HF | ENSG00000135913 | 2  | 184  | 9   | 5E+05 | 0.047518 | USP37        | 0.528567102333932 | 1 |

|         |                 |    |     |    |       |          |          |                   |   |
|---------|-----------------|----|-----|----|-------|----------|----------|-------------------|---|
| COPD-HF | ENSG00000081818 | 5  | 10  | 3  | 5E+05 | 0.047517 | PCDHB4   | 0.528567102333932 | 1 |
| COPD-HF | ENSG00000196683 | 7  | 61  | 8  | 5E+05 | 0.04745  | TOMM7    | 0.528567102333932 | 1 |
| COPD-HF | ENSG00000196381 | 19 | 53  | 9  | 5E+05 | 0.047395 | ZNF781   | 0.528567102333932 | 1 |
| COPD-HF | ENSG00000248487 | 3  | 10  | 6  | 5E+05 | 0.047378 | ABHD14A  | 0.528567102333932 | 1 |
| COPD-HF | ENSG00000070540 | 17 | 93  | 16 | 5E+05 | 0.04727  | WIPI1    | 0.528077521212121 | 1 |
| COPD-HF | ENSG00000072571 | 5  | 69  | 9  | 5E+05 | 0.04726  | HMMR     | 0.528077521212121 | 1 |
| COPD-HF | ENSG00000198556 | 7  | 36  | 10 | 5E+05 | 0.047226 | ZNF789   | 0.528077521212121 | 1 |
| COPD-HF | ENSG00000060642 | 1  | 12  | 4  | 5E+05 | 0.047168 | PIGV     | 0.52789784092289  | 1 |
| COPD-HF | ENSG00000000971 | 1  | 208 | 14 | 5E+05 | 0.047152 | CFH      | 0.52789784092289  | 1 |
| COPD-HF | ENSG00000116521 | 1  | 6   | 1  | 5E+05 | 0.047034 | SCAMP3   | 0.52703812887538  | 1 |
| COPD-HF | ENSG00000139718 | 12 | 34  | 5  | 5E+05 | 0.047008 | SETD1B   | 0.52703812887538  | 1 |
| COPD-HF | ENSG00000102901 | 16 | 18  | 3  | 5E+05 | 0.047008 | CENPT    | 0.52703812887538  | 1 |
| COPD-HF | ENSG00000006788 | 17 | 238 | 29 | 5E+05 | 0.046891 | MYH13    | 0.526395738733252 | 1 |
| COPD-HF | ENSG00000106799 | 9  | 82  | 9  | 5E+05 | 0.046881 | TGFBR1   | 0.526395738733252 | 1 |
| COPD-HF | ENSG00000184076 | 22 | 5   | 2  | 5E+05 | 0.046748 | UQCR10   | 0.525430417073171 | 1 |
| COPD-HF | ENSG00000128250 | 22 | 11  | 2  | 5E+05 | 0.046716 | RFPL1    | 0.525391109212935 | 1 |
| COPD-HF | ENSG00000157741 | 7  | 107 | 12 | 5E+05 | 0.046704 | UBN2     | 0.525391109212935 | 1 |
| COPD-HF | ENSG00000188321 | 19 | 55  | 5  | 5E+05 | 0.046585 | ZNF559   | 0.52455791386683  | 1 |
| COPD-HF | ENSG00000166188 | 16 | 12  | 4  | 5E+05 | 0.046543 | ZNF319   | 0.524405329462103 | 1 |
| COPD-HF | ENSG00000188322 | 16 | 35  | 11 | 5E+05 | 0.046518 | SBK1     | 0.524405329462103 | 1 |
| COPD-HF | ENSG00000181371 | 11 | 1   | 1  | 5E+05 | 0.046472 | OR5M8    | 0.524246252141983 | 1 |
| COPD-HF | ENSG00000196345 | 3  | 59  | 6  | 5E+05 | 0.046412 | ZKSCAN7  | 0.523890015921617 | 1 |
| COPD-HF | ENSG00000162241 | 11 | 10  | 4  | 5E+05 | 0.046292 | SLC25A45 | 0.522855659313725 | 1 |
| COPD-HF | ENSG00000139410 | 12 | 21  | 3  | 5E+05 | 0.046231 | SDSL     | 0.522486832004905 | 1 |
| COPD-HF | ENSG00000129347 | 19 | 50  | 8  | 5E+05 | 0.046215 | KRI1     | 0.522486832004905 | 1 |
| COPD-HF | ENSG00000179965 | 16 | 19  | 6  | 5E+05 | 0.046179 | ZNF771   | 0.522486832004905 | 1 |
| COPD-HF | ENSG00000108582 | 17 | 94  | 8  | 5E+05 | 0.046152 | CPD      | 0.522486832004905 | 1 |
| COPD-HF | ENSG00000174173 | 3  | 12  | 5  | 5E+05 | 0.046026 | TRMT10C  | 0.52144883712354  | 1 |
| COPD-HF | ENSG00000143476 | 1  | 216 | 23 | 5E+05 | 0.046025 | DTL      | 0.52144883712354  | 1 |
| COPD-HF | ENSG00000206181 | 18 | 9   | 3  | 5E+05 | 0.045941 | TCEB3B   | 0.521126432615385 | 1 |
| COPD-HF | ENSG00000245680 | 19 | 49  | 10 | 5E+05 | 0.04593  | ZNF585B  | 0.521126432615385 | 1 |
| COPD-HF | ENSG00000105879 | 7  | 28  | 4  | 5E+05 | 0.045916 | CBLL1    | 0.521126432615385 | 1 |
| COPD-HF | ENSG00000176208 | 17 | 120 | 6  | 5E+05 | 0.045803 | ATAD5    | 0.520522009247842 | 1 |

|         |                 |    |     |    |       |          |                               |   |
|---------|-----------------|----|-----|----|-------|----------|-------------------------------|---|
| COPD-HF | ENSG00000273303 | 3  | 49  | 5  | 5E+05 | 0.045799 | RP11-944L7.50.520522009247842 | 1 |
| COPD-HF | ENSG00000103769 | 15 | 295 | 20 | 5E+05 | 0.045777 | RAB11A 0.520522009247842      | 1 |
| COPD-HF | ENSG00000262601 | 16 | 58  | 14 | 5E+05 | 0.045708 | CTC-786C10.0.520404919085856  | 1 |
| COPD-HF | ENSG00000148600 | 10 | 79  | 12 | 5E+05 | 0.045683 | CDHR1 0.520404919085856       | 1 |
| COPD-HF | ENSG00000172489 | 11 | 1   | 1  | 5E+05 | 0.045683 | OR5T3 0.520404919085856       | 1 |
| COPD-HF | ENSG00000101546 | 18 | 40  | 5  | 5E+05 | 0.045627 | RBFA 0.520404919085856        | 1 |
| COPD-HF | ENSG00000181785 | 11 | 5   | 1  | 5E+05 | 0.045622 | OR5AS1 0.520404919085856      | 1 |
| COPD-HF | ENSG00000162148 | 11 | 13  | 4  | 5E+05 | 0.045603 | PPP1R32 0.520404919085856     | 1 |
| COPD-HF | ENSG00000135973 | 2  | 1   | 1  | 5E+05 | 0.045506 | GPR45 0.520032298822071       | 1 |
| COPD-HF | ENSG00000130589 | 20 | 65  | 14 | 5E+05 | 0.04547  | HELZ2 0.519943244416874       | 1 |
| COPD-HF | ENSG00000112667 | 6  | 5   | 3  | 5E+05 | 0.045346 | DNPH1 0.518847186840472       | 1 |
| COPD-HF | ENSG00000064933 | 2  | 169 | 17 | 5E+05 | 0.045344 | PMS1 0.518847186840472        | 1 |
| COPD-HF | ENSG00000255394 | 8  | 11  | 4  | 5E+05 | 0.045272 | C8orf49 0.518644360472343     | 1 |
| COPD-HF | ENSG00000164694 | 6  | 345 | 14 | 5E+05 | 0.045247 | FNDC1 0.518644360472343       | 1 |
| COPD-HF | ENSG00000154856 | 18 | 115 | 16 | 5E+05 | 0.045219 | APCDD1 0.518644360472343      | 1 |
| COPD-HF | ENSG00000228259 | 5  | 2   | 1  | 5E+05 | 0.045177 | AC136604.1 0.518522815068493  | 1 |
| COPD-HF | ENSG00000100170 | 22 | 166 | 9  | 5E+05 | 0.045176 | SLC5A1 0.518522815068493      | 1 |
| COPD-HF | ENSG00000073861 | 17 | 39  | 8  | 5E+05 | 0.045102 | TBX21 0.518307460099751       | 1 |
| COPD-HF | ENSG00000162676 | 1  | 20  | 5  | 5E+05 | 0.044966 | GFI1 0.517066923268871        | 1 |
| COPD-HF | ENSG00000137812 | 15 | 125 | 11 | 5E+05 | 0.044957 | CASC5 0.517066923268871       | 1 |
| COPD-HF | ENSG00000174939 | 16 | 20  | 5  | 5E+05 | 0.044926 | ASPHD1 0.517066923268871      | 1 |
| COPD-HF | ENSG00000151838 | 14 | 227 | 17 | 5E+05 | 0.044857 | CCDC175 0.516780676           | 1 |
| COPD-HF | ENSG00000064886 | 1  | 134 | 18 | 5E+05 | 0.044806 | CHI3L2 0.516515946216385      | 1 |
| COPD-HF | ENSG00000116209 | 1  | 29  | 6  | 5E+05 | 0.044803 | TMEM59 0.516515946216385      | 1 |
| COPD-HF | ENSG00000170946 | 11 | 81  | 9  | 5E+05 | 0.044779 | DNAJC24 0.516515946216385     | 1 |
| COPD-HF | ENSG00000204021 | 10 | 146 | 8  | 5E+05 | 0.044705 | LIPK 0.516320341478697        | 1 |
| COPD-HF | ENSG00000157330 | 1  | 32  | 7  | 5E+05 | 0.044573 | C1orf158 0.515118563636364    | 1 |
| COPD-HF | ENSG00000023572 | 1  | 12  | 4  | 5E+05 | 0.044552 | GLRX2 0.515118563636364       | 1 |
| COPD-HF | ENSG00000157119 | 3  | 8   | 3  | 5E+05 | 0.044538 | KLHL40 0.515118563636364      | 1 |
| COPD-HF | ENSG00000144560 | 3  | 535 | 39 | 5E+05 | 0.04452  | VGLL4 0.515118563636364       | 1 |
| COPD-HF | ENSG00000115042 | 2  | 6   | 3  | 5E+05 | 0.044511 | FAHD2A 0.515118563636364      | 1 |
| COPD-HF | ENSG00000102871 | 16 | 3   | 1  | 5E+05 | 0.044504 | TRADD 0.515118563636364       | 1 |
| COPD-HF | ENSG00000180340 | 17 | 1   | 1  | 5E+05 | 0.0444   | FZD2 0.515056765261171        | 1 |

|         |                 |    |      |    |       |          |             |                   |   |
|---------|-----------------|----|------|----|-------|----------|-------------|-------------------|---|
| COPD-HF | ENSG00000254440 | 6  | 10   | 2  | 5E+05 | 0.044262 | PBOV1       | 0.513779248110831 | 1 |
| COPD-HF | ENSG00000113525 | 5  | 12   | 2  | 5E+05 | 0.044254 | IL5         | 0.513779248110831 | 1 |
| COPD-HF | ENSG00000151148 | 12 | 145  | 17 | 5E+05 | 0.044217 | UBE3B       | 0.513779248110831 | 1 |
| COPD-HF | ENSG00000129235 | 17 | 16   | 4  | 5E+05 | 0.044184 | TXNDC17     | 0.513779248110831 | 1 |
| COPD-HF | ENSG00000174444 | 15 | 79   | 12 | 5E+05 | 0.04418  | RPL4        | 0.513779248110831 | 1 |
| COPD-HF | ENSG00000137494 | 11 | 119  | 13 | 5E+05 | 0.043936 | ANKRD42     | 0.511605993682881 | 1 |
| COPD-HF | ENSG00000112658 | 6  | 11   | 3  | 5E+05 | 0.043926 | SRF         | 0.511605993682881 | 1 |
| COPD-HF | ENSG00000236609 | 7  | 22   | 5  | 5E+05 | 0.043864 | ZNF853      | 0.511413733080329 | 1 |
| COPD-HF | ENSG00000140374 | 15 | 178  | 12 | 5E+05 | 0.043673 | ETFA        | 0.509509119620253 | 1 |
| COPD-HF | ENSG00000112659 | 6  | 79   | 10 | 5E+05 | 0.043621 | CUL9        | 0.509224758074731 | 1 |
| COPD-HF | ENSG00000183090 | 4  | 207  | 18 | 5E+05 | 0.043611 | FREM3       | 0.509224758074731 | 1 |
| COPD-HF | ENSG00000125459 | 1  | 99   | 13 | 5E+05 | 0.043455 | MSTO1       | 0.507930256816741 | 1 |
| COPD-HF | ENSG00000144580 | 2  | 46   | 4  | 5E+05 | 0.043451 | RQCD1       | 0.507930256816741 | 1 |
| COPD-HF | ENSG00000110906 | 12 | 119  | 10 | 5E+05 | 0.043379 | KCTD10      | 0.507685782222222 | 1 |
| COPD-HF | ENSG00000270011 | 19 | 117  | 6  | 5E+05 | 0.043319 | ZNF559-ZNF1 | 0.507305671537484 | 1 |
| COPD-HF | ENSG00000109519 | 4  | 23   | 3  | 5E+05 | 0.043247 | GRPEL1      | 0.506784457088366 | 1 |
| COPD-HF | ENSG00000184056 | 15 | 69   | 10 | 5E+05 | 0.043234 | VPS33B      | 0.506784457088366 | 1 |
| COPD-HF | ENSG00000181761 | 11 | 13   | 3  | 5E+05 | 0.043182 | OR8H3       | 0.506666967536601 | 1 |
| COPD-HF | ENSG00000170848 | 19 | 55   | 8  | 5E+05 | 0.043173 | PSG6        | 0.506666967536601 | 1 |
| COPD-HF | ENSG00000188629 | 19 | 115  | 6  | 5E+05 | 0.043165 | ZNF177      | 0.506666967536601 | 1 |
| COPD-HF | ENSG00000105329 | 19 | 91   | 12 | 5E+05 | 0.043125 | TGFB1       | 0.506666967536601 | 1 |
| COPD-HF | ENSG00000105676 | 19 | 53   | 8  | 5E+05 | 0.043065 | ARMC6       | 0.506584010848756 | 1 |
| COPD-HF | ENSG00000156671 | 10 | 150  | 15 | 5E+05 | 0.04306  | SAMD8       | 0.506584010848756 | 1 |
| COPD-HF | ENSG00000109458 | 4  | 221  | 26 | 5E+05 | 0.042999 | GAB1        | 0.506454036421725 | 1 |
| COPD-HF | ENSG00000143167 | 1  | 106  | 17 | 5E+05 | 0.042985 | GPA33       | 0.506454036421725 | 1 |
| COPD-HF | ENSG00000108244 | 17 | 52   | 7  | 5E+05 | 0.042949 | KRT23       | 0.506454036421725 | 1 |
| COPD-HF | ENSG00000075213 | 7  | 1503 | 65 | 5E+05 | 0.042906 | SEMA3A      | 0.506329256081946 | 1 |
| COPD-HF | ENSG00000130307 | 19 | 100  | 16 | 5E+05 | 0.042864 | USHBP1      | 0.506157663036515 | 1 |
| COPD-HF | ENSG00000214367 | 4  | 32   | 4  | 5E+05 | 0.042818 | HAUS3       | 0.505938585897436 | 1 |
| COPD-HF | ENSG00000253293 | 7  | 9    | 3  | 5E+05 | 0.042817 | HOXA10      | 0.505938585897436 | 1 |
| COPD-HF | ENSG00000079435 | 19 | 11   | 4  | 5E+05 | 0.042813 | LIPE        | 0.505938585897436 | 1 |
| COPD-HF | ENSG00000178966 | 9  | 32   | 5  | 5E+05 | 0.042726 | RMII        | 0.505824250481696 | 1 |
| COPD-HF | ENSG00000124467 | 19 | 265  | 14 | 5E+05 | 0.04271  | PSG8        | 0.505824250481696 | 1 |

|         |                 |    |      |    |       |          |          |                   |   |
|---------|-----------------|----|------|----|-------|----------|----------|-------------------|---|
| COPD-HF | ENSG00000136738 | 10 | 292  | 15 | 5E+05 | 0.042705 | STAM     | 0.505824250481696 | 1 |
| COPD-HF | ENSG00000131504 | 5  | 154  | 23 | 5E+05 | 0.04262  | DIAPH1   | 0.505543410553411 | 1 |
| COPD-HF | ENSG00000179761 | 17 | 165  | 32 | 5E+05 | 0.042512 | PIPOX    | 0.504587054732775 | 1 |
| COPD-HF | ENSG00000180479 | 19 | 77   | 10 | 5E+05 | 0.042436 | ZNF571   | 0.504009528350515 | 1 |
| COPD-HF | ENSG00000198169 | 8  | 37   | 10 | 5E+05 | 0.042386 | ZNF251   | 0.50374025660864  | 1 |
| COPD-HF | ENSG00000132801 | 20 | 66   | 7  | 5E+05 | 0.042369 | ZSWIM3   | 0.50374025660864  | 1 |
| COPD-HF | ENSG00000075884 | 2  | 1387 | 80 | 5E+05 | 0.042357 | ARHGAP15 | 0.50374025660864  | 1 |
| COPD-HF | ENSG00000241058 | 10 | 344  | 16 | 5E+05 | 0.04231  | NSUN6    | 0.50374025660864  | 1 |
| COPD-HF | ENSG00000076513 | 12 | 69   | 12 | 5E+05 | 0.04226  | ANKRD13A | 0.503541422107305 | 1 |
| COPD-HF | ENSG00000189320 | 7  | 50   | 9  | 5E+05 | 0.042232 | FAM180A  | 0.503533283311772 | 1 |
| COPD-HF | ENSG00000051825 | 12 | 213  | 9  | 5E+05 | 0.04218  | MPHOSPH9 | 0.503238796116505 | 1 |
| COPD-HF | ENSG00000181752 | 11 | 1    | 1  | 5E+05 | 0.042117 | OR8K5    | 0.502812604274611 | 1 |
| COPD-HF | ENSG00000134987 | 5  | 100  | 11 | 5E+05 | 0.042116 | WDR36    | 0.502812604274611 | 1 |
| COPD-HF | ENSG00000172171 | 17 | 19   | 2  | 5E+05 | 0.042075 | TEFM     | 0.502812604274611 | 1 |
| COPD-HF | ENSG00000160917 | 7  | 37   | 6  | 5E+05 | 0.041996 | CPSF4    | 0.5023441064244   | 1 |
| COPD-HF | ENSG00000149925 | 16 | 10   | 4  | 5E+05 | 0.041935 | ALDOA    | 0.501940165584416 | 1 |
| COPD-HF | ENSG00000180185 | 16 | 116  | 3  | 5E+05 | 0.041876 | FAHD1    | 0.501559654320988 | 1 |
| COPD-HF | ENSG00000131951 | 14 | 237  | 12 | 5E+05 | 0.041865 | LRRC9    | 0.501559654320988 | 1 |
| COPD-HF | ENSG00000197714 | 19 | 39   | 7  | 5E+05 | 0.041853 | ZNF460   | 0.501559654320988 | 1 |
| COPD-HF | ENSG00000225828 | 1  | 1    | 1  | 5E+05 | 0.041829 | FAM229A  | 0.501559654320988 | 1 |
| COPD-HF | ENSG00000126602 | 16 | 177  | 27 | 5E+05 | 0.041819 | TRAP1    | 0.501559654320988 | 1 |
| COPD-HF | ENSG00000169504 | 1  | 80   | 8  | 5E+05 | 0.041818 | CLIC4    | 0.501559654320988 | 1 |
| COPD-HF | ENSG00000038274 | 5  | 34   | 7  | 5E+05 | 0.041761 | MAT2B    | 0.501559654320988 | 1 |
| COPD-HF | ENSG00000186866 | 21 | 52   | 5  | 5E+05 | 0.041742 | POFUT2   | 0.501559654320988 | 1 |
| COPD-HF | ENSG00000099377 | 16 | 7    | 2  | 5E+05 | 0.041709 | HSD3B7   | 0.501559654320988 | 1 |
| COPD-HF | ENSG00000147955 | 9  | 6    | 3  | 5E+05 | 0.0417   | SIGMAR1  | 0.501559654320988 | 1 |
| COPD-HF | ENSG00000149654 | 20 | 269  | 33 | 5E+05 | 0.04166  | CDH22    | 0.501559654320988 | 1 |
| COPD-HF | ENSG00000132911 | 5  | 143  | 6  | 5E+05 | 0.041657 | NMUR2    | 0.501559654320988 | 1 |
| COPD-HF | ENSG00000100151 | 22 | 32   | 7  | 5E+05 | 0.041631 | PICK1    | 0.501559654320988 | 1 |
| COPD-HF | ENSG00000153561 | 2  | 60   | 7  | 5E+05 | 0.041579 | RMND5A   | 0.501559654320988 | 1 |
| COPD-HF | ENSG00000122194 | 6  | 118  | 11 | 5E+05 | 0.041548 | PLG      | 0.501559654320988 | 1 |
| COPD-HF | ENSG00000160307 | 21 | 27   | 6  | 5E+05 | 0.041548 | S100B    | 0.501559654320988 | 1 |
| COPD-HF | ENSG00000179292 | 11 | 6    | 3  | 5E+05 | 0.041419 | TMEM151A | 0.501297719632305 | 1 |

|         |                 |    |     |    |       |          |          |                   |   |
|---------|-----------------|----|-----|----|-------|----------|----------|-------------------|---|
| COPD-HF | ENSG00000100197 | 22 | 10  | 5  | 5E+05 | 0.041399 | CYP2D6   | 0.501297719632305 | 1 |
| COPD-HF | ENSG00000165699 | 9  | 94  | 12 | 5E+05 | 0.041388 | TSC1     | 0.501297719632305 | 1 |
| COPD-HF | ENSG00000126773 | 14 | 174 | 6  | 5E+05 | 0.041376 | PCNXL4   | 0.501297719632305 | 1 |
| COPD-HF | ENSG00000130775 | 1  | 46  | 9  | 5E+05 | 0.04137  | THEMIS2  | 0.501297719632305 | 1 |
| COPD-HF | ENSG00000170266 | 3  | 306 | 26 | 5E+05 | 0.041365 | GLB1     | 0.501297719632305 | 1 |
| COPD-HF | ENSG00000141696 | 17 | 24  | 4  | 5E+05 | 0.041186 | LEPREL4  | 0.500449266974291 | 1 |
| COPD-HF | ENSG00000177875 | 12 | 4   | 2  | 5E+05 | 0.041168 | C12orf68 | 0.500449266974291 | 1 |
| COPD-HF | ENSG00000103740 | 15 | 227 | 41 | 5E+05 | 0.041113 | ACSBG1   | 0.500221735313531 | 1 |
| COPD-HF | ENSG00000177125 | 9  | 25  | 7  | 5E+05 | 0.041077 | ZBTB34   | 0.500113831571995 | 1 |
| COPD-HF | ENSG00000134884 | 13 | 25  | 7  | 5E+05 | 0.041017 | ARGLU1   | 0.499713391275611 | 1 |
| COPD-HF | ENSG00000061918 | 4  | 114 | 21 | 5E+05 | 0.041005 | GUCY1B3  | 0.499713391275611 | 1 |
| COPD-HF | ENSG00000120616 | 10 | 242 | 17 | 5E+05 | 0.040983 | EPC1     | 0.499713391275611 | 1 |
| COPD-HF | ENSG00000186174 | 11 | 44  | 13 | 5E+05 | 0.040974 | BCL9L    | 0.499713391275611 | 1 |
| COPD-HF | ENSG00000149923 | 16 | 10  | 3  | 5E+05 | 0.040941 | PPP4C    | 0.499713391275611 | 1 |
| COPD-HF | ENSG00000152133 | 2  | 32  | 5  | 5E+05 | 0.040883 | GPATCH11 | 0.499713391275611 | 1 |
| COPD-HF | ENSG00000144452 | 2  | 354 | 39 | 5E+05 | 0.040706 | ABCA12   | 0.497898936960849 | 1 |
| COPD-HF | ENSG00000137817 | 15 | 39  | 5  | 5E+05 | 0.040698 | PARP6    | 0.497898936960849 | 1 |
| COPD-HF | ENSG00000175294 | 11 | 21  | 4  | 5E+05 | 0.040618 | CATSPER1 | 0.497482786710964 | 1 |
| COPD-HF | ENSG00000163909 | 1  | 36  | 13 | 5E+05 | 0.040545 | HEYL     | 0.496918873005319 | 1 |
| COPD-HF | ENSG00000143153 | 1  | 89  | 16 | 5E+05 | 0.040522 | ATP1B1   | 0.496918873005319 | 1 |
| COPD-HF | ENSG00000196233 | 10 | 157 | 10 | 5E+05 | 0.040518 | LCOR     | 0.496918873005319 | 1 |
| COPD-HF | ENSG00000136688 | 2  | 16  | 4  | 5E+05 | 0.040467 | IL36G    | 0.496918873005319 | 1 |
| COPD-HF | ENSG00000176697 | 11 | 85  | 10 | 5E+05 | 0.040428 | BDNF     | 0.496806216       | 1 |
| COPD-HF | ENSG00000111077 | 12 | 40  | 10 | 5E+05 | 0.040425 | TENC1    | 0.496806216       | 1 |
| COPD-HF | ENSG00000159556 | 15 | 14  | 4  | 5E+05 | 0.040381 | ISL2     | 0.496806216       | 1 |
| COPD-HF | ENSG00000078804 | 20 | 8   | 2  | 5E+05 | 0.040371 | TP53INP2 | 0.496806216       | 1 |
| COPD-HF | ENSG00000160113 | 19 | 32  | 11 | 5E+05 | 0.040362 | NR2F6    | 0.496806216       | 1 |
| COPD-HF | ENSG00000255150 | 12 | 2   | 1  | 5E+05 | 0.040341 | EID3     | 0.496806216       | 1 |
| COPD-HF | ENSG00000138085 | 2  | 11  | 3  | 5E+05 | 0.040302 | ATRAID   | 0.496806216       | 1 |
| COPD-HF | ENSG00000010244 | 17 | 47  | 9  | 5E+05 | 0.040266 | ZNF207   | 0.496806216       | 1 |
| COPD-HF | ENSG00000162545 | 1  | 3   | 2  | 5E+05 | 0.040254 | CAMK2N1  | 0.496806216       | 1 |
| COPD-HF | ENSG00000143469 | 1  | 313 | 15 | 5E+05 | 0.040247 | SYT14    | 0.496806216       | 1 |
| COPD-HF | ENSG00000132170 | 3  | 315 | 22 | 5E+05 | 0.040245 | PPARG    | 0.496806216       | 1 |

|         |                 |    |      |    |       |          |               |                   |   |
|---------|-----------------|----|------|----|-------|----------|---------------|-------------------|---|
| COPD-HF | ENSG00000182257 | 22 | 12   | 3  | 5E+05 | 0.040193 | C22orf26      | 0.496806216       | 1 |
| COPD-HF | ENSG00000157613 | 11 | 70   | 13 | 5E+05 | 0.040134 | CREB3L1       | 0.496806216       | 1 |
| COPD-HF | ENSG00000125901 | 20 | 4    | 2  | 5E+05 | 0.040077 | MRPS26        | 0.496798480833894 | 1 |
| COPD-HF | ENSG00000169220 | 5  | 17   | 4  | 5E+05 | 0.039919 | RGS14         | 0.495172898384926 | 1 |
| COPD-HF | ENSG00000138448 | 2  | 117  | 15 | 5E+05 | 0.039906 | ITGAV         | 0.495172898384926 | 1 |
| COPD-HF | ENSG00000174851 | 11 | 6    | 2  | 5E+05 | 0.039898 | YIF1A         | 0.495172898384926 | 1 |
| COPD-HF | ENSG00000119318 | 9  | 154  | 17 | 5E+05 | 0.039895 | RAD23B        | 0.495172898384926 | 1 |
| COPD-HF | ENSG00000071991 | 18 | 203  | 23 | 5E+05 | 0.039893 | CDH19         | 0.495172898384926 | 1 |
| COPD-HF | ENSG00000168038 | 3  | 1955 | 38 | 5E+05 | 0.039889 | ULK4          | 0.495172898384926 | 1 |
| COPD-HF | ENSG00000163581 | 3  | 73   | 6  | 5E+05 | 0.039889 | SLC2A2        | 0.495172898384926 | 1 |
| COPD-HF | ENSG00000267318 | 17 | 42   | 7  | 5E+05 | 0.039876 | RP11-178C3.10 | 0.495172898384926 | 1 |
| COPD-HF | ENSG00000090273 | 1  | 61   | 9  | 5E+05 | 0.039821 | NUDC          | 0.495172898384926 | 1 |
| COPD-HF | ENSG00000142039 | 19 | 26   | 3  | 5E+05 | 0.039784 | CCDC97        | 0.495172898384926 | 1 |
| COPD-HF | ENSG00000143627 | 1  | 12   | 2  | 5E+05 | 0.039777 | PKLR          | 0.495172898384926 | 1 |
| COPD-HF | ENSG00000141639 | 18 | 373  | 46 | 5E+05 | 0.039687 | MAPK4         | 0.495172898384926 | 1 |
| COPD-HF | ENSG00000173511 | 11 | 2    | 1  | 5E+05 | 0.039573 | VEGFB         | 0.494877278833107 | 1 |
| COPD-HF | ENSG00000135094 | 12 | 70   | 4  | 5E+05 | 0.039417 | SDS           | 0.493261073319756 | 1 |
| COPD-HF | ENSG00000198054 | 21 | 119  | 13 | 5E+05 | 0.039376 | DSCR8         | 0.49308275        | 1 |
| COPD-HF | ENSG00000160791 | 3  | 16   | 3  | 5E+05 | 0.039344 | CCR5          | 0.493016962610469 | 1 |
| COPD-HF | ENSG00000116539 | 1  | 136  | 15 | 5E+05 | 0.039252 | ASH1L         | 0.492198718367347 | 1 |
| COPD-HF | ENSG00000181619 | 14 | 105  | 12 | 5E+05 | 0.039188 | GPR135        | 0.491730703880191 | 1 |
| COPD-HF | ENSG00000162302 | 11 | 22   | 3  | 5E+05 | 0.039151 | RPS6KA4       | 0.491601078337875 | 1 |
| COPD-HF | ENSG00000136754 | 10 | 326  | 17 | 5E+05 | 0.03915  | ABI1          | 0.491601078337875 | 1 |
| COPD-HF | ENSG00000139218 | 12 | 74   | 11 | 5E+05 | 0.039148 | SCAF11        | 0.491601078337875 | 1 |
| COPD-HF | ENSG00000127831 | 2  | 37   | 4  | 5E+05 | 0.039096 | VIL1          | 0.491601078337875 | 1 |
| COPD-HF | ENSG00000104320 | 8  | 144  | 7  | 5E+05 | 0.039091 | NBN           | 0.491601078337875 | 1 |
| COPD-HF | ENSG00000204913 | 17 | 8    | 3  | 5E+05 | 0.03894  | LRRC3C        | 0.490622706766917 | 1 |
| COPD-HF | ENSG00000100413 | 22 | 28   | 3  | 5E+05 | 0.038921 | POLR3H        | 0.490622706766917 | 1 |
| COPD-HF | ENSG00000085721 | 16 | 52   | 11 | 5E+05 | 0.038846 | RRN3          | 0.490108362765229 | 1 |
| COPD-HF | ENSG00000177181 | 1  | 125  | 8  | 5E+05 | 0.038844 | RIMKLA        | 0.490108362765229 | 1 |
| COPD-HF | ENSG00000145246 | 4  | 345  | 31 | 5E+05 | 0.038837 | ATP10D        | 0.490108362765229 | 1 |
| COPD-HF | ENSG00000203910 | 1  | 17   | 4  | 5E+05 | 0.038811 | C1orf146      | 0.490108362765229 | 1 |
| COPD-HF | ENSG00000089876 | 10 | 58   | 10 | 5E+05 | 0.038798 | DHX32         | 0.490108362765229 | 1 |

|         |                 |    |     |    |       |          |            |                   |   |
|---------|-----------------|----|-----|----|-------|----------|------------|-------------------|---|
| COPD-HF | ENSG00000108375 | 17 | 103 | 14 | 5E+05 | 0.038764 | RNF43      | 0.490108362765229 | 1 |
| COPD-HF | ENSG00000214944 | 5  | 858 | 60 | 5E+05 | 0.038652 | ARHGEF28   | 0.489671694845361 | 1 |
| COPD-HF | ENSG00000185009 | 10 | 51  | 6  | 5E+05 | 0.038625 | AP3M1      | 0.489666179504814 | 1 |
| COPD-HF | ENSG00000171703 | 20 | 59  | 13 | 5E+05 | 0.038596 | TCEA2      | 0.489635284239505 | 1 |
| COPD-HF | ENSG00000173557 | 2  | 40  | 7  | 5E+05 | 0.038571 | C2orf70    | 0.489635284239505 | 1 |
| COPD-HF | ENSG00000163633 | 4  | 114 | 13 | 5E+05 | 0.038568 | C4orf36    | 0.489635284239505 | 1 |
| COPD-HF | ENSG00000174970 | 11 | 11  | 1  | 5E+05 | 0.038531 | OR10AG1    | 0.489635284239505 | 1 |
| COPD-HF | ENSG00000153820 | 2  | 621 | 25 | 5E+05 | 0.038455 | SPHKAP     | 0.489193247066943 | 1 |
| COPD-HF | ENSG00000159640 | 17 | 92  | 9  | 5E+05 | 0.038406 | ACE        | 0.488907319060774 | 1 |
| COPD-HF | ENSG00000012223 | 3  | 158 | 19 | 5E+05 | 0.038367 | LTF        | 0.488748383552177 | 1 |
| COPD-HF | ENSG00000168159 | 1  | 23  | 7  | 5E+05 | 0.038235 | RNF187     | 0.487403703319502 | 1 |
| COPD-HF | ENSG00000144161 | 2  | 44  | 7  | 5E+05 | 0.038212 | ZC3H8      | 0.487403703319502 | 1 |
| COPD-HF | ENSG00000144048 | 2  | 11  | 3  | 5E+05 | 0.038204 | DUSP11     | 0.487403703319502 | 1 |
| COPD-HF | ENSG00000101444 | 20 | 31  | 2  | 5E+05 | 0.038198 | AHCY       | 0.487403703319502 | 1 |
| COPD-HF | ENSG00000188921 | 9  | 123 | 14 | 5E+05 | 0.038161 | PTPLAD2    | 0.487403703319502 | 1 |
| COPD-HF | ENSG00000161203 | 3  | 21  | 6  | 5E+05 | 0.038077 | AP2M1      | 0.48707379666898  | 1 |
| COPD-HF | ENSG00000116161 | 1  | 16  | 5  | 5E+05 | 0.038058 | CACYBP     | 0.48707379666898  | 1 |
| COPD-HF | ENSG00000137500 | 11 | 60  | 6  | 5E+05 | 0.037985 | CCDC90B    | 0.486572275886032 | 1 |
| COPD-HF | ENSG00000069812 | 1  | 37  | 7  | 5E+05 | 0.037971 | HES2       | 0.486572275886032 | 1 |
| COPD-HF | ENSG00000148019 | 9  | 88  | 14 | 5E+05 | 0.037858 | CEP78      | 0.485620399443285 | 1 |
| COPD-HF | ENSG00000167578 | 19 | 61  | 12 | 5E+05 | 0.037845 | RAB4B      | 0.485620399443285 | 1 |
| COPD-HF | ENSG00000196141 | 2  | 365 | 38 | 5E+05 | 0.037823 | SPATS2L    | 0.485620399443285 | 1 |
| COPD-HF | ENSG00000168795 | 9  | 42  | 12 | 5E+05 | 0.037818 | ZBTB5      | 0.485620399443285 | 1 |
| COPD-HF | ENSG00000103599 | 15 | 372 | 19 | 5E+05 | 0.03775  | IQCH       | 0.485586706210747 | 1 |
| COPD-HF | ENSG00000125779 | 20 | 78  | 9  | 5E+05 | 0.037703 | PANK2      | 0.485320809357542 | 1 |
| COPD-HF | ENSG00000128713 | 2  | 10  | 3  | 5E+05 | 0.037692 | HOXD11     | 0.485320809357542 | 1 |
| COPD-HF | ENSG00000211450 | 11 | 3   | 1  | 5E+05 | 0.037682 | C11orf31   | 0.485320809357542 | 1 |
| COPD-HF | ENSG00000186432 | 3  | 86  | 9  | 5E+05 | 0.037662 | KPNA4      | 0.485320809357542 | 1 |
| COPD-HF | ENSG00000150051 | 10 | 150 | 16 | 5E+05 | 0.037655 | MKX        | 0.485320809357542 | 1 |
| COPD-HF | ENSG00000169826 | 10 | 103 | 12 | 5E+05 | 0.037646 | CSGALNACT1 | 0.485320809357542 | 1 |
| COPD-HF | ENSG00000164008 | 1  | 41  | 8  | 5E+05 | 0.037632 | C1orf50    | 0.485320809357542 | 1 |
| COPD-HF | ENSG00000165637 | 10 | 37  | 8  | 5E+05 | 0.037601 | VDAC2      | 0.485320809357542 | 1 |
| COPD-HF | ENSG00000111912 | 6  | 242 | 25 | 5E+05 | 0.037534 | NCOA7      | 0.485320809357542 | 1 |

|         |                 |    |     |    |       |          |            |                   |   |
|---------|-----------------|----|-----|----|-------|----------|------------|-------------------|---|
| COPD-HF | ENSG00000113758 | 5  | 32  | 5  | 5E+05 | 0.037511 | DBN1       | 0.485320809357542 | 1 |
| COPD-HF | ENSG00000157500 | 3  | 59  | 9  | 5E+05 | 0.037219 | APPL1      | 0.48245979395218  | 1 |
| COPD-HF | ENSG00000134253 | 1  | 38  | 7  | 5E+05 | 0.037174 | TRIM45     | 0.482215581984518 | 1 |
| COPD-HF | ENSG00000103047 | 16 | 458 | 26 | 5E+05 | 0.037166 | TANGO6     | 0.482215581984518 | 1 |
| COPD-HF | ENSG00000255046 | 8  | 28  | 8  | 5E+05 | 0.037133 | RP11-297N6 | 0.482215581984518 | 1 |
| COPD-HF | ENSG00000104228 | 8  | 39  | 6  | 5E+05 | 0.037085 | TRIM35     | 0.48207884696756  | 1 |
| COPD-HF | ENSG00000117305 | 1  | 41  | 4  | 5E+05 | 0.037042 | HMGCL      | 0.481859693719125 | 1 |
| COPD-HF | ENSG00000139644 | 12 | 150 | 11 | 5E+05 | 0.036934 | TMBIM6     | 0.480794083333333 | 1 |
| COPD-HF | ENSG00000028528 | 15 | 85  | 10 | 5E+05 | 0.036893 | SNX1       | 0.480599766077739 | 1 |
| COPD-HF | ENSG00000196378 | 8  | 27  | 2  | 5E+05 | 0.036831 | ZNF34      | 0.480131416548798 | 1 |
| COPD-HF | ENSG00000175920 | 4  | 245 | 31 | 5E+05 | 0.036829 | DOK7       | 0.480131416548798 | 1 |
| COPD-HF | ENSG00000170423 | 12 | 20  | 5  | 5E+05 | 0.036816 | KRT78      | 0.480131416548798 | 1 |
| COPD-HF | ENSG00000141431 | 18 | 344 | 23 | 5E+05 | 0.036806 | ASXL3      | 0.480131416548798 | 1 |
| COPD-HF | ENSG00000129465 | 14 | 16  | 2  | 5E+05 | 0.036801 | RIPK3      | 0.480131416548798 | 1 |
| COPD-HF | ENSG00000084112 | 12 | 97  | 17 | 5E+05 | 0.036797 | SSH1       | 0.480131416548798 | 1 |
| COPD-HF | ENSG00000151687 | 2  | 135 | 15 | 5E+05 | 0.036743 | ANKAR      | 0.480131416548798 | 1 |
| COPD-HF | ENSG00000120885 | 8  | 37  | 6  | 5E+05 | 0.036703 | CLU        | 0.480131416548798 | 1 |
| COPD-HF | ENSG00000134909 | 11 | 582 | 21 | 5E+05 | 0.036547 | ARHGAP32   | 0.479140007823613 | 1 |
| COPD-HF | ENSG00000131188 | 5  | 11  | 3  | 5E+05 | 0.036533 | PRR7       | 0.479140007823613 | 1 |
| COPD-HF | ENSG00000179295 | 12 | 79  | 12 | 5E+05 | 0.036524 | PTPN11     | 0.479140007823613 | 1 |
| COPD-HF | ENSG00000168872 | 16 | 22  | 7  | 5E+05 | 0.036507 | DDX19A     | 0.479140007823613 | 1 |
| COPD-HF | ENSG00000144369 | 2  | 107 | 14 | 5E+05 | 0.036491 | FAM171B    | 0.479140007823613 | 1 |
| COPD-HF | ENSG00000152404 | 11 | 402 | 23 | 5E+05 | 0.03645  | CWF19L2    | 0.479140007823613 | 1 |
| COPD-HF | ENSG00000130299 | 19 | 26  | 5  | 5E+05 | 0.036372 | GTPBP3     | 0.47888934        | 1 |
| COPD-HF | ENSG00000181291 | 17 | 121 | 25 | 5E+05 | 0.036362 | TMEM132E   | 0.47888934        | 1 |
| COPD-HF | ENSG00000067225 | 15 | 35  | 7  | 5E+05 | 0.036181 | PKM        | 0.477056060801144 | 1 |
| COPD-HF | ENSG00000102904 | 16 | 27  | 6  | 5E+05 | 0.036165 | TSNAXIP1   | 0.477056060801144 | 1 |
| COPD-HF | ENSG00000138109 | 10 | 159 | 15 | 5E+05 | 0.036156 | CYP2C9     | 0.477056060801144 | 1 |
| COPD-HF | ENSG00000170677 | 18 | 121 | 18 | 5E+05 | 0.036114 | SOCS6      | 0.477056060801144 | 1 |
| COPD-HF | ENSG00000148700 | 10 | 163 | 16 | 5E+05 | 0.036063 | ADD3       | 0.476864619081779 | 1 |
| COPD-HF | ENSG00000103657 | 15 | 519 | 17 | 5E+05 | 0.036029 | HERC1      | 0.476757040201005 | 1 |
| COPD-HF | ENSG00000198625 | 1  | 113 | 9  | 5E+05 | 0.035983 | MDM4       | 0.47649040158046  | 1 |
| COPD-HF | ENSG00000116205 | 1  | 104 | 11 | 5E+05 | 0.035969 | TCEANC2    | 0.47649040158046  | 1 |

|         |                 |    |     |    |       |          |            |                   |   |
|---------|-----------------|----|-----|----|-------|----------|------------|-------------------|---|
| COPD-HF | ENSG00000197457 | 20 | 28  | 6  | 5E+05 | 0.035938 | STMN3      | 0.47649040158046  | 1 |
| COPD-HF | ENSG00000171136 | 19 | 9   | 3  | 5E+05 | 0.03591  | RLN3       | 0.47649040158046  | 1 |
| COPD-HF | ENSG00000162927 | 2  | 120 | 20 | 5E+05 | 0.035907 | PUS10      | 0.47649040158046  | 1 |
| COPD-HF | ENSG00000253304 | 1  | 9   | 3  | 5E+05 | 0.035906 | TMEM200B   | 0.47649040158046  | 1 |
| COPD-HF | ENSG00000052723 | 1  | 3   | 1  | 5E+05 | 0.035793 | SIKE1      | 0.47602624025974  | 1 |
| COPD-HF | ENSG00000139405 | 12 | 10  | 2  | 5E+05 | 0.035739 | RITA1      | 0.475651254151625 | 1 |
| COPD-HF | ENSG00000110148 | 11 | 51  | 8  | 5E+05 | 0.035734 | CCKBR      | 0.475651254151625 | 1 |
| COPD-HF | ENSG00000105088 | 19 | 191 | 21 | 5E+05 | 0.035685 | OLFM2      | 0.475619381778742 | 1 |
| COPD-HF | ENSG00000077380 | 2  | 103 | 14 | 5E+05 | 0.035575 | DYNC1I2    | 0.474496363965268 | 1 |
| COPD-HF | ENSG00000166260 | 17 | 61  | 6  | 5E+05 | 0.035484 | COX11      | 0.473625323678494 | 1 |
| COPD-HF | ENSG00000213494 | 17 | 76  | 10 | 5E+05 | 0.035479 | CCL14      | 0.473625323678494 | 1 |
| COPD-HF | ENSG00000123064 | 12 | 43  | 4  | 5E+05 | 0.035423 | DDX54      | 0.473496852066715 | 1 |
| COPD-HF | ENSG00000100625 | 14 | 11  | 3  | 5E+05 | 0.03542  | SIX4       | 0.473496852066715 | 1 |
| COPD-HF | ENSG00000149743 | 11 | 4   | 2  | 5E+05 | 0.035334 | TRPT1      | 0.472993189542484 | 1 |
| COPD-HF | ENSG00000009830 | 14 | 143 | 24 | 5E+05 | 0.035283 | POMT2      | 0.472653734738372 | 1 |
| COPD-HF | ENSG00000163374 | 1  | 20  | 5  | 5E+05 | 0.035223 | YY1AP1     | 0.472193133818182 | 1 |
| COPD-HF | ENSG00000231924 | 19 | 56  | 6  | 5E+05 | 0.035185 | PSG1       | 0.472027005094614 | 1 |
| COPD-HF | ENSG00000154310 | 3  | 919 | 92 | 5E+05 | 0.035097 | TNIK       | 0.471189367079388 | 1 |
| COPD-HF | ENSG00000240771 | 12 | 18  | 6  | 5E+05 | 0.035074 | ARHGEF25   | 0.471189367079388 | 1 |
| COPD-HF | ENSG00000147535 | 8  | 7   | 3  | 5E+05 | 0.03504  | PPAPDC1B   | 0.471110371991247 | 1 |
| COPD-HF | ENSG00000175318 | 15 | 38  | 7  | 5E+05 | 0.034839 | GRAMD2     | 0.468749844525548 | 1 |
| COPD-HF | ENSG00000198844 | 17 | 39  | 10 | 5E+05 | 0.03482  | ARHGEF15   | 0.468749844525548 | 1 |
| COPD-HF | ENSG00000123473 | 1  | 139 | 8  | 5E+05 | 0.034766 | STIL       | 0.468451519005848 | 1 |
| COPD-HF | ENSG00000180346 | 4  | 4   | 1  | 5E+05 | 0.034731 | TIGD2      | 0.468322255303584 | 1 |
| COPD-HF | ENSG00000013275 | 19 | 24  | 5  | 5E+05 | 0.034697 | PSMC4      | 0.468206296486091 | 1 |
| COPD-HF | ENSG00000100319 | 22 | 103 | 9  | 5E+05 | 0.034658 | ZMAT5      | 0.468022647619048 | 1 |
| COPD-HF | ENSG00000147697 | 8  | 100 | 16 | 5E+05 | 0.034657 | GSDMC      | 0.468022647619048 | 1 |
| COPD-HF | ENSG00000101166 | 20 | 13  | 4  | 5E+05 | 0.034652 | SLMO2      | 0.468022647619048 | 1 |
| COPD-HF | ENSG00000119801 | 2  | 26  | 9  | 5E+05 | 0.034624 | YPEL5      | 0.468022647619048 | 1 |
| COPD-HF | ENSG00000186446 | 3  | 15  | 4  | 5E+05 | 0.034604 | ZNF501     | 0.468022647619048 | 1 |
| COPD-HF | ENSG00000161574 | 17 | 72  | 9  | 5E+05 | 0.034567 | CCL15-CCL1 | 0.468022647619048 | 1 |
| COPD-HF | ENSG00000107949 | 10 | 41  | 7  | 5E+05 | 0.034477 | BCCIP      | 0.467633952170714 | 1 |
| COPD-HF | ENSG00000163666 | 3  | 37  | 7  | 5E+05 | 0.034435 | HESX1      | 0.467408214285714 | 1 |

|         |                 |    |      |    |       |          |         |                   |   |
|---------|-----------------|----|------|----|-------|----------|---------|-------------------|---|
| COPD-HF | ENSG00000120729 | 5  | 11   | 3  | 5E+05 | 0.034425 | MYOT    | 0.467408214285714 | 1 |
| COPD-HF | ENSG00000089169 | 12 | 537  | 47 | 5E+05 | 0.03435  | RPH3A   | 0.466942146017699 | 1 |
| COPD-HF | ENSG00000126500 | 11 | 46   | 9  | 5E+05 | 0.03433  | FLRT1   | 0.466942146017699 | 1 |
| COPD-HF | ENSG00000158092 | 3  | 168  | 6  | 5E+05 | 0.034293 | NCK1    | 0.466855885524372 | 1 |
| COPD-HF | ENSG00000163875 | 1  | 64   | 11 | 5E+05 | 0.034256 | MEAF6   | 0.466696857354028 | 1 |
| COPD-HF | ENSG00000165841 | 10 | 402  | 15 | 5E+05 | 0.034252 | CYP2C19 | 0.466696857354028 | 1 |
| COPD-HF | ENSG00000119326 | 9  | 193  | 20 | 5E+05 | 0.034208 | CTNNAL1 | 0.466696857354028 | 1 |
| COPD-HF | ENSG00000135148 | 12 | 22   | 5  | 5E+05 | 0.034176 | TRAFD1  | 0.466641635555556 | 1 |
| COPD-HF | ENSG00000111684 | 12 | 41   | 5  | 5E+05 | 0.034173 | LPCAT3  | 0.466641635555556 | 1 |
| COPD-HF | ENSG00000173068 | 9  | 1327 | 74 | 5E+05 | 0.034152 | BNC2    | 0.466641635555556 | 1 |
| COPD-HF | ENSG00000137831 | 15 | 147  | 12 | 5E+05 | 0.03413  | UACA    | 0.466641635555556 | 1 |
| COPD-HF | ENSG00000010282 | 3  | 18   | 4  | 5E+05 | 0.034044 | HHATL   | 0.466220692421991 | 1 |
| COPD-HF | ENSG00000172057 | 17 | 10   | 4  | 5E+05 | 0.034019 | ORMDL3  | 0.466220692421991 | 1 |
| COPD-HF | ENSG00000221909 | 7  | 9    | 3  | 5E+05 | 0.033998 | FAM200A | 0.466220692421991 | 1 |
| COPD-HF | ENSG00000010319 | 3  | 14   | 6  | 5E+05 | 0.033945 | SEMA3G  | 0.465903339538347 | 1 |
| COPD-HF | ENSG00000105982 | 7  | 79   | 9  | 5E+05 | 0.033939 | RNF32   | 0.465903339538347 | 1 |
| COPD-HF | ENSG00000165644 | 10 | 1    | 1  | 5E+05 | 0.033908 | COMTD1  | 0.465903339538347 | 1 |
| COPD-HF | ENSG00000173598 | 12 | 57   | 8  | 5E+05 | 0.033863 | NUDT4   | 0.465818417164179 | 1 |
| COPD-HF | ENSG00000186583 | 8  | 17   | 5  | 5E+05 | 0.033858 | SPATC1  | 0.465818417164179 | 1 |
| COPD-HF | ENSG00000091009 | 5  | 222  | 14 | 5E+05 | 0.033765 | RBM27   | 0.465164607623318 | 1 |
| COPD-HF | ENSG00000058091 | 7  | 1915 | 65 | 5E+05 | 0.033711 | CDK14   | 0.464768035153328 | 1 |
| COPD-HF | ENSG00000111271 | 12 | 55   | 5  | 5E+05 | 0.033699 | ACAD10  | 0.464768035153328 | 1 |
| COPD-HF | ENSG00000168917 | 3  | 87   | 4  | 5E+05 | 0.033684 | SLC35G2 | 0.464768035153328 | 1 |
| COPD-HF | ENSG00000177096 | 22 | 11   | 3  | 5E+05 | 0.033673 | FAM109B | 0.464768035153328 | 1 |
| COPD-HF | ENSG00000186566 | 17 | 140  | 10 | 5E+05 | 0.033549 | GPATCH8 | 0.463922518379595 | 1 |
| COPD-HF | ENSG00000213930 | 9  | 18   | 5  | 5E+05 | 0.033506 | GALT    | 0.463675749249249 | 1 |
| COPD-HF | ENSG00000108671 | 17 | 36   | 8  | 5E+05 | 0.033482 | PSMD11  | 0.463675749249249 | 1 |
| COPD-HF | ENSG00000128487 | 17 | 653  | 18 | 5E+05 | 0.033409 | SPECC1  | 0.463028644360902 | 1 |
| COPD-HF | ENSG00000124767 | 6  | 63   | 11 | 5E+05 | 0.033347 | GLO1    | 0.462517118886381 | 1 |
| COPD-HF | ENSG00000113396 | 5  | 1781 | 42 | 5E+05 | 0.033315 | SLC27A6 | 0.462421231174699 | 1 |
| COPD-HF | ENSG00000182896 | 17 | 3    | 1  | 5E+05 | 0.033172 | TMEM95  | 0.460783327807084 | 1 |
| COPD-HF | ENSG00000111300 | 12 | 72   | 11 | 5E+05 | 0.03313  | NAA25   | 0.46054697586727  | 1 |
| COPD-HF | ENSG00000110536 | 11 | 5    | 2  | 5E+05 | 0.033124 | PTPMT1  | 0.46054697586727  | 1 |

|         |                 |    |      |     |       |          |         |                   |   |
|---------|-----------------|----|------|-----|-------|----------|---------|-------------------|---|
| COPD-HF | ENSG00000183888 | 1  | 16   | 5   | 5E+05 | 0.033106 | C1orf64 | 0.46054697586727  | 1 |
| COPD-HF | ENSG00000186710 | 12 | 14   | 1   | 5E+05 | 0.033097 | CCDC42B | 0.46054697586727  | 1 |
| COPD-HF | ENSG00000020633 | 1  | 119  | 24  | 5E+05 | 0.03306  | RUNX3   | 0.46054697586727  | 1 |
| COPD-HF | ENSG00000105229 | 19 | 92   | 9   | 5E+05 | 0.032995 | PIAS4   | 0.460406385314156 | 1 |
| COPD-HF | ENSG00000081014 | 15 | 213  | 15  | 5E+05 | 0.032977 | AP4E1   | 0.460406385314156 | 1 |
| COPD-HF | ENSG00000113742 | 5  | 173  | 17  | 5E+05 | 0.03296  | CPEB4   | 0.460406385314156 | 1 |
| COPD-HF | ENSG00000123119 | 8  | 308  | 11  | 5E+05 | 0.032946 | NECAB1  | 0.460406385314156 | 1 |
| COPD-HF | ENSG00000160570 | 19 | 18   | 2   | 5E+05 | 0.032915 | DEDD2   | 0.460406385314156 | 1 |
| COPD-HF | ENSG00000137571 | 8  | 396  | 36  | 5E+05 | 0.0329   | SLCO5A1 | 0.460406385314156 | 1 |
| COPD-HF | ENSG00000164347 | 5  | 81   | 9   | 5E+05 | 0.032885 | GFM2    | 0.460406385314156 | 1 |
| COPD-HF | ENSG00000126749 | 12 | 36   | 6   | 5E+05 | 0.032867 | EMG1    | 0.460406385314156 | 1 |
| COPD-HF | ENSG00000174776 | 3  | 253  | 26  | 5E+05 | 0.032864 | WDR49   | 0.460406385314156 | 1 |
| COPD-HF | ENSG00000119401 | 9  | 25   | 6   | 5E+05 | 0.032854 | TRIM32  | 0.460406385314156 | 1 |
| COPD-HF | ENSG00000167104 | 20 | 36   | 6   | 5E+05 | 0.032769 | BPIFB6  | 0.460406385314156 | 1 |
| COPD-HF | ENSG00000108439 | 17 | 16   | 6   | 5E+05 | 0.032676 | PNPO    | 0.459783746564885 | 1 |
| COPD-HF | ENSG00000160161 | 19 | 16   | 2   | 5E+05 | 0.032632 | CILP2   | 0.459515398013751 | 1 |
| COPD-HF | ENSG0000006047  | 17 | 8    | 2   | 5E+05 | 0.032591 | YBX2    | 0.459288916666667 | 1 |
| COPD-HF | ENSG00000109189 | 4  | 77   | 6   | 5E+05 | 0.032581 | USP46   | 0.459288916666667 | 1 |
| COPD-HF | ENSG00000105251 | 19 | 26   | 5   | 5E+05 | 0.032576 | SHD     | 0.459288916666667 | 1 |
| COPD-HF | ENSG00000162642 | 1  | 23   | 8   | 5E+05 | 0.032552 | C1orf52 | 0.459288916666667 | 1 |
| COPD-HF | ENSG00000082497 | 1  | 13   | 5   | 5E+05 | 0.03251  | SERTAD4 | 0.459288916666667 | 1 |
| COPD-HF | ENSG00000114861 | 3  | 1172 | 104 | 5E+05 | 0.032476 | FOXP1   | 0.459288916666667 | 1 |
| COPD-HF | ENSG00000109618 | 4  | 67   | 12  | 5E+05 | 0.032465 | SEPSECS | 0.459288916666667 | 1 |
| COPD-HF | ENSG00000165120 | 7  | 16   | 4   | 5E+05 | 0.032452 | SSMEM1  | 0.459288916666667 | 1 |
| COPD-HF | ENSG00000112208 | 6  | 18   | 4   | 5E+05 | 0.032413 | BAG2    | 0.459288916666667 | 1 |
| COPD-HF | ENSG00000181754 | 1  | 9    | 4   | 5E+05 | 0.03238  | AMIGO1  | 0.459288916666667 | 1 |
| COPD-HF | ENSG00000074266 | 11 | 72   | 9   | 5E+05 | 0.032269 | EED     | 0.458254604776579 | 1 |
| COPD-HF | ENSG00000119328 | 9  | 41   | 8   | 5E+05 | 0.032237 | FAM206A | 0.458153138781804 | 1 |
| COPD-HF | ENSG00000023191 | 11 | 54   | 8   | 5E+05 | 0.032076 | RNH1    | 0.45621675        | 1 |
| COPD-HF | ENSG00000243943 | 2  | 98   | 10  | 5E+05 | 0.03202  | ZNF512  | 0.455771938223938 | 1 |
| COPD-HF | ENSG00000117500 | 1  | 54   | 9   | 5E+05 | 0.032019 | TMED5   | 0.455771938223938 | 1 |
| COPD-HF | ENSG00000203859 | 1  | 15   | 2   | 5E+05 | 0.031995 | HSD3B2  | 0.455771938223938 | 1 |
| COPD-HF | ENSG00000122483 | 1  | 202  | 15  | 5E+05 | 0.031943 | CCDC18  | 0.455731671052632 | 1 |

|         |                 |    |      |     |       |          |            |                   |   |
|---------|-----------------|----|------|-----|-------|----------|------------|-------------------|---|
| COPD-HF | ENSG00000121621 | 11 | 96   | 12  | 5E+05 | 0.031915 | KIF18A     | 0.455684891556933 | 1 |
| COPD-HF | ENSG00000197562 | 16 | 103  | 7   | 5E+05 | 0.031845 | RAB40C     | 0.455037895348837 | 1 |
| COPD-HF | ENSG00000135213 | 7  | 71   | 12  | 5E+05 | 0.031828 | POM121C    | 0.455037895348837 | 1 |
| COPD-HF | ENSG00000164932 | 8  | 36   | 7   | 5E+05 | 0.031827 | CTHRC1     | 0.455037895348837 | 1 |
| COPD-HF | ENSG00000114383 | 3  | 3    | 2   | 5E+05 | 0.03179  | TUSC2      | 0.455037895348837 | 1 |
| COPD-HF | ENSG00000147432 | 8  | 176  | 6   | 5E+05 | 0.03176  | CHRN3      | 0.455037895348837 | 1 |
| COPD-HF | ENSG00000131981 | 14 | 37   | 4   | 5E+05 | 0.031734 | LGALS3     | 0.455037895348837 | 1 |
| COPD-HF | ENSG00000112183 | 6  | 18   | 5   | 5E+05 | 0.031659 | RBM24      | 0.454494039719626 | 1 |
| COPD-HF | ENSG00000047365 | 4  | 728  | 52  | 5E+05 | 0.031604 | ARAP2      | 0.454058091971941 | 1 |
| COPD-HF | ENSG00000173486 | 11 | 3    | 2   | 5E+05 | 0.031577 | FKBP2      | 0.454024056942278 | 1 |
| COPD-HF | ENSG00000198276 | 20 | 30   | 10  | 5E+05 | 0.031526 | UCKL1      | 0.453644619828259 | 1 |
| COPD-HF | ENSG00000108423 | 17 | 56   | 8   | 5E+05 | 0.031462 | TUBD1      | 0.4530773796875   | 1 |
| COPD-HF | ENSG00000149043 | 11 | 35   | 8   | 5E+05 | 0.031415 | SYT8       | 0.452754257232213 | 1 |
| COPD-HF | ENSG00000076382 | 17 | 13   | 8   | 5E+05 | 0.031376 | SPAG5      | 0.452546015649452 | 1 |
| COPD-HF | ENSG00000145075 | 3  | 546  | 32  | 5E+05 | 0.031315 | CCDC39     | 0.452019886452623 | 1 |
| COPD-HF | ENSG00000043514 | 1  | 107  | 12  | 5E+05 | 0.031293 | TRIT1      | 0.452019886452623 | 1 |
| COPD-HF | ENSG00000166323 | 11 | 222  | 12  | 5E+05 | 0.031249 | C11orf65   | 0.451774758431373 | 1 |
| COPD-HF | ENSG00000181649 | 11 | 2    | 1   | 5E+05 | 0.031148 | PHLDA2     | 0.450668040816327 | 1 |
| COPD-HF | ENSG00000215114 | 8  | 69   | 10  | 5E+05 | 0.031134 | UBXN2B     | 0.450668040816327 | 1 |
| COPD-HF | ENSG00000106125 | 7  | 394  | 26  | 5E+05 | 0.031114 | FAM188B    | 0.450668040816327 | 1 |
| COPD-HF | ENSG00000144736 | 3  | 147  | 9   | 5E+05 | 0.03108  | SHQ1       | 0.450668040816327 | 1 |
| COPD-HF | ENSG00000089639 | 19 | 21   | 6   | 5E+05 | 0.031065 | GMIP       | 0.450668040816327 | 1 |
| COPD-HF | ENSG00000268412 | 2  | 1    | 1   | 5E+05 | 0.030816 | AC013449.1 | 0.447621219858156 | 1 |
| COPD-HF | ENSG00000101337 | 20 | 98   | 8   | 5E+05 | 0.030686 | TM9SF4     | 0.446084414826499 | 1 |
| COPD-HF | ENSG00000187871 | 6  | 364  | 23  | 5E+05 | 0.030682 | GFRAL      | 0.446084414826499 | 1 |
| COPD-HF | ENSG00000164221 | 5  | 51   | 9   | 5E+05 | 0.030677 | CCDC112    | 0.446084414826499 | 1 |
| COPD-HF | ENSG00000137936 | 1  | 826  | 29  | 5E+05 | 0.030671 | BCAR3      | 0.446084414826499 | 1 |
| COPD-HF | ENSG00000185666 | 22 | 1535 | 102 | 5E+05 | 0.030637 | SYN3       | 0.446084414826499 | 1 |
| COPD-HF | ENSG00000043143 | 5  | 134  | 22  | 5E+05 | 0.030613 | JADE2      | 0.446084414826499 | 1 |
| COPD-HF | ENSG00000196526 | 4  | 845  | 36  | 5E+05 | 0.03061  | AFAP1      | 0.446084414826499 | 1 |
| COPD-HF | ENSG00000103044 | 16 | 22   | 8   | 5E+05 | 0.030606 | HAS3       | 0.446084414826499 | 1 |
| COPD-HF | ENSG00000205147 | 19 | 9    | 4   | 5E+05 | 0.0306   | AC016586.1 | 0.446084414826499 | 1 |
| COPD-HF | ENSG00000179094 | 17 | 31   | 8   | 5E+05 | 0.030545 | PER1       | 0.446084414826499 | 1 |

|         |                 |    |     |    |       |          |              |                   |   |
|---------|-----------------|----|-----|----|-------|----------|--------------|-------------------|---|
| COPD-HF | ENSG00000255223 | 11 | 6   | 2  | 5E+05 | 0.03045  | OR5M11       | 0.446084414826499 | 1 |
| COPD-HF | ENSG00000075043 | 20 | 248 | 30 | 5E+05 | 0.030345 | KCNQ2        | 0.444987577565632 | 1 |
| COPD-HF | ENSG00000176920 | 19 | 35  | 4  | 5E+05 | 0.030327 | FUT2         | 0.444987577565632 | 1 |
| COPD-HF | ENSG00000168924 | 4  | 21  | 12 | 5E+05 | 0.030299 | LETM1        | 0.444987577565632 | 1 |
| COPD-HF | ENSG00000109182 | 4  | 114 | 9  | 5E+05 | 0.030285 | CWH43        | 0.444987577565632 | 1 |
| COPD-HF | ENSG00000146232 | 6  | 15  | 6  | 5E+05 | 0.030193 | NFKBIE       | 0.444172042298484 | 1 |
| COPD-HF | ENSG00000164093 | 4  | 37  | 7  | 5E+05 | 0.030168 | PITX2        | 0.444158741214058 | 1 |
| COPD-HF | ENSG00000139445 | 12 | 57  | 10 | 5E+05 | 0.030067 | FOXN4        | 0.443025588329337 | 1 |
| COPD-HF | ENSG00000099381 | 16 | 27  | 3  | 5E+05 | 0.030031 | SETD1A       | 0.442849138       | 1 |
| COPD-HF | ENSG00000183196 | 16 | 28  | 12 | 5E+05 | 0.030023 | CHST6        | 0.442849138       | 1 |
| COPD-HF | ENSG00000169964 | 3  | 2   | 1  | 5E+05 | 0.030021 | TMEM42       | 0.442849138       | 1 |
| COPD-HF | ENSG00000165702 | 9  | 160 | 37 | 5E+05 | 0.030001 | GFI1B        | 0.442849138       | 1 |
| COPD-HF | ENSG00000185129 | 5  | 3   | 2  | 5E+05 | 0.029969 | PURA         | 0.442849138       | 1 |
| COPD-HF | ENSG00000181322 | 3  | 49  | 15 | 5E+05 | 0.029964 | NME9         | 0.442849138       | 1 |
| COPD-HF | ENSG00000204020 | 10 | 67  | 12 | 5E+05 | 0.029907 | LIPN         | 0.442849138       | 1 |
| COPD-HF | ENSG00000114166 | 3  | 443 | 28 | 5E+05 | 0.029905 | KAT2B        | 0.442849138       | 1 |
| COPD-HF | ENSG00000269795 | 1  | 11  | 4  | 5E+05 | 0.029865 | AC092782.1   | 0.442849138       | 1 |
| COPD-HF | ENSG00000111530 | 12 | 153 | 13 | 5E+05 | 0.029858 | CAND1        | 0.442849138       | 1 |
| COPD-HF | ENSG00000151465 | 10 | 127 | 15 | 5E+05 | 0.029812 | CDC123       | 0.442849138       | 1 |
| COPD-HF | ENSG00000197851 | 7  | 42  | 9  | 5E+05 | 0.029809 | C7orf76      | 0.442849138       | 1 |
| COPD-HF | ENSG00000067208 | 1  | 508 | 10 | 5E+05 | 0.029766 | EVI5         | 0.442849138       | 1 |
| COPD-HF | ENSG00000120696 | 13 | 4   | 1  | 5E+05 | 0.029722 | KBTBD7       | 0.442849138       | 1 |
| COPD-HF | ENSG00000084733 | 2  | 169 | 7  | 5E+05 | 0.029655 | RAB10        | 0.442257779126214 | 1 |
| COPD-HF | ENSG00000171492 | 1  | 156 | 32 | 5E+05 | 0.029642 | LRRRC8D      | 0.442257779126214 | 1 |
| COPD-HF | ENSG00000106526 | 7  | 144 | 15 | 5E+05 | 0.029595 | ACTR3C       | 0.442078310372771 | 1 |
| COPD-HF | ENSG00000159176 | 1  | 91  | 12 | 5E+05 | 0.029591 | CSRP1        | 0.442078310372771 | 1 |
| COPD-HF | ENSG00000167258 | 17 | 171 | 10 | 5E+05 | 0.029561 | CDK12        | 0.442078310372771 | 1 |
| COPD-HF | ENSG00000253426 | 8  | 21  | 3  | 5E+05 | 0.029521 | RP11-10A14.4 | 0.442047597887896 | 1 |
| COPD-HF | ENSG00000170915 | 6  | 157 | 31 | 5E+05 | 0.029455 | PAQR8        | 0.441417898373984 | 1 |
| COPD-HF | ENSG00000106460 | 7  | 182 | 9  | 5E+05 | 0.02944  | TMEM106B     | 0.441417898373984 | 1 |
| COPD-HF | ENSG00000118971 | 12 | 59  | 15 | 5E+05 | 0.029425 | CCND2        | 0.441417898373984 | 1 |
| COPD-HF | ENSG00000206260 | 3  | 3   | 2  | 5E+05 | 0.029402 | PRR23A       | 0.441417898373984 | 1 |
| COPD-HF | ENSG00000139428 | 12 | 88  | 13 | 5E+05 | 0.029358 | MMAB         | 0.441399685154976 | 1 |

|         |                 |    |     |    |       |          |             |                   |   |
|---------|-----------------|----|-----|----|-------|----------|-------------|-------------------|---|
| COPD-HF | ENSG00000134242 | 1  | 89  | 13 | 5E+05 | 0.029247 | PTPN22      | 0.440089755918367 | 1 |
| COPD-HF | ENSG00000125686 | 17 | 68  | 6  | 5E+05 | 0.029246 | MED1        | 0.440089755918367 | 1 |
| COPD-HF | ENSG00000050130 | 14 | 70  | 8  | 5E+05 | 0.029234 | JKAMP       | 0.440089755918367 | 1 |
| COPD-HF | ENSG00000178053 | 3  | 102 | 12 | 5E+05 | 0.029227 | MLF1        | 0.440089755918367 | 1 |
| COPD-HF | ENSG00000106113 | 7  | 105 | 18 | 5E+05 | 0.029144 | CRHR2       | 0.439976537264537 | 1 |
| COPD-HF | ENSG00000071082 | 2  | 49  | 7  | 5E+05 | 0.02905  | RPL31       | 0.438916926229508 | 1 |
| COPD-HF | ENSG00000164744 | 7  | 76  | 6  | 5E+05 | 0.02902  | SUN3        | 0.438823347005742 | 1 |
| COPD-HF | ENSG00000104129 | 15 | 49  | 6  | 5E+05 | 0.028972 | DNAJC17     | 0.438457205254516 | 1 |
| COPD-HF | ENSG00000164967 | 9  | 2   | 1  | 5E+05 | 0.028916 | RPP25L      | 0.437969291700904 | 1 |
| COPD-HF | ENSG00000254959 | 7  | 459 | 31 | 5E+05 | 0.028849 | INMT-FAM113 | 0.437313829769737 | 1 |
| COPD-HF | ENSG00000149781 | 11 | 29  | 7  | 5E+05 | 0.028823 | FERMT3      | 0.43727930781893  | 1 |
| COPD-HF | ENSG00000196263 | 19 | 69  | 9  | 5E+05 | 0.028748 | ZNF471      | 0.436500728171334 | 1 |
| COPD-HF | ENSG00000079462 | 19 | 4   | 1  | 5E+05 | 0.02872  | PAFAH1B3    | 0.436435086562242 | 1 |
| COPD-HF | ENSG00000084764 | 2  | 55  | 4  | 5E+05 | 0.0287   | MAPRE3      | 0.436435086562242 | 1 |
| COPD-HF | ENSG00000157150 | 3  | 16  | 5  | 5E+05 | 0.028687 | TIMP4       | 0.436435086562242 | 1 |
| COPD-HF | ENSG00000133789 | 11 | 265 | 10 | 5E+05 | 0.028604 | SWAP70      | 0.435750026446281 | 1 |
| COPD-HF | ENSG00000139437 | 12 | 164 | 16 | 5E+05 | 0.028519 | TCHP        | 0.434814497105045 | 1 |
| COPD-HF | ENSG00000249590 | 22 | 44  | 11 | 5E+05 | 0.028486 | RP4-539M6.1 | 0.434670892384106 | 1 |
| COPD-HF | ENSG00000138795 | 4  | 191 | 17 | 5E+05 | 0.028455 | LEF1        | 0.434557593206297 | 1 |
| COPD-HF | ENSG00000226887 | 4  | 37  | 3  | 5E+05 | 0.028413 | ERVMER34-10 | 0.43427597761194  | 1 |
| COPD-HF | ENSG00000110921 | 12 | 63  | 11 | 5E+05 | 0.028354 | MVK         | 0.433733843983403 | 1 |
| COPD-HF | ENSG00000008130 | 1  | 65  | 8  | 5E+05 | 0.028353 | NADK        | 0.433733843983403 | 1 |
| COPD-HF | ENSG00000113248 | 5  | 5   | 3  | 5E+05 | 0.028329 | PCDHB15     | 0.433733843983403 | 1 |
| COPD-HF | ENSG00000163935 | 3  | 251 | 18 | 5E+05 | 0.028325 | SFMBT1      | 0.433733843983403 | 1 |
| COPD-HF | ENSG00000110955 | 12 | 7   | 1  | 5E+05 | 0.028266 | ATP5B       | 0.433733843983403 | 1 |
| COPD-HF | ENSG00000021776 | 15 | 233 | 18 | 5E+05 | 0.028244 | AQR         | 0.433733843983403 | 1 |
| COPD-HF | ENSG00000204991 | 16 | 142 | 14 | 5E+05 | 0.028199 | SPIRE2      | 0.433521407005838 | 1 |
| COPD-HF | ENSG00000100285 | 22 | 27  | 6  | 5E+05 | 0.028139 | NEFH        | 0.432960089315526 | 1 |
| COPD-HF | ENSG00000168374 | 3  | 68  | 9  | 5E+05 | 0.028135 | ARF4        | 0.432960089315526 | 1 |
| COPD-HF | ENSG00000205212 | 17 | 78  | 15 | 5E+05 | 0.02808  | CCDC144NL   | 0.432774782608696 | 1 |
| COPD-HF | ENSG00000203993 | 9  | 1   | 1  | 5E+05 | 0.028072 | C9orf37     | 0.432774782608696 | 1 |
| COPD-HF | ENSG00000099849 | 11 | 11  | 5  | 5E+05 | 0.028047 | RASSF7      | 0.432774782608696 | 1 |
| COPD-HF | ENSG00000156603 | 11 | 7   | 3  | 5E+05 | 0.028    | MED19       | 0.432626990779547 | 1 |

|         |                 |    |     |    |       |          |         |                   |   |
|---------|-----------------|----|-----|----|-------|----------|---------|-------------------|---|
| COPD-HF | ENSG00000159023 | 1  | 347 | 19 | 5E+05 | 0.027986 | EPB41   | 0.432626990779547 | 1 |
| COPD-HF | ENSG00000163629 | 4  | 535 | 12 | 5E+05 | 0.027875 | PTPN13  | 0.431418870696893 | 1 |
| COPD-HF | ENSG00000132698 | 1  | 5   | 3  | 5E+05 | 0.027867 | RAB25   | 0.431418870696893 | 1 |
| COPD-HF | ENSG00000130758 | 19 | 31  | 8  | 5E+05 | 0.027812 | MAP3K10 | 0.431167868797309 | 1 |
| COPD-HF | ENSG00000126464 | 19 | 77  | 9  | 5E+05 | 0.027789 | PRR12   | 0.431167868797309 | 1 |
| COPD-HF | ENSG00000125447 | 17 | 39  | 5  | 5E+05 | 0.027711 | GGA3    | 0.430325916596462 | 1 |
| COPD-HF | ENSG00000153832 | 2  | 116 | 17 | 5E+05 | 0.027703 | FBXO36  | 0.430325916596462 | 1 |
| COPD-HF | ENSG00000064999 | 6  | 152 | 17 | 5E+05 | 0.027647 | ANKS1A  | 0.430056667510549 | 1 |
| COPD-HF | ENSG00000115318 | 2  | 16  | 4  | 5E+05 | 0.027602 | LOXL3   | 0.429719313       | 1 |
| COPD-HF | ENSG00000128928 | 15 | 78  | 8  | 5E+05 | 0.027562 | IVD     | 0.42945929501268  | 1 |
| COPD-HF | ENSG00000125378 | 14 | 15  | 3  | 5E+05 | 0.027559 | BMP4    | 0.42945929501268  | 1 |
| COPD-HF | ENSG00000117479 | 1  | 31  | 9  | 5E+05 | 0.027542 | SLC19A2 | 0.42945929501268  | 1 |
| COPD-HF | ENSG00000129245 | 17 | 33  | 8  | 5E+05 | 0.027513 | FXR2    | 0.42945929501268  | 1 |
| COPD-HF | ENSG00000148180 | 9  | 225 | 20 | 5E+05 | 0.027512 | GSN     | 0.42945929501268  | 1 |
| COPD-HF | ENSG00000118402 | 6  | 105 | 10 | 5E+05 | 0.027464 | ELOVL4  | 0.42945929501268  | 1 |
| COPD-HF | ENSG00000242852 | 19 | 153 | 10 | 5E+05 | 0.027426 | ZNF709  | 0.42945929501268  | 1 |
| COPD-HF | ENSG00000118849 | 3  | 104 | 12 | 5E+05 | 0.027392 | RARRES1 | 0.429350965986395 | 1 |
| COPD-HF | ENSG00000165806 | 10 | 144 | 16 | 5E+05 | 0.027335 | CASP7   | 0.428822174468085 | 1 |
| COPD-HF | ENSG00000136731 | 2  | 230 | 16 | 5E+05 | 0.027295 | UGGT1   | 0.428559399488927 | 1 |
| COPD-HF | ENSG00000139977 | 14 | 19  | 4  | 5E+05 | 0.027295 | NAA30   | 0.428559399488927 | 1 |
| COPD-HF | ENSG00000141720 | 17 | 59  | 11 | 5E+05 | 0.027275 | PIP4K2B | 0.428559399488927 | 1 |
| COPD-HF | ENSG00000161791 | 12 | 95  | 9  | 5E+05 | 0.027271 | FMNL3   | 0.428559399488927 | 1 |
| COPD-HF | ENSG00000205517 | 19 | 78  | 8  | 5E+05 | 0.027251 | RGL3    | 0.428559399488927 | 1 |
| COPD-HF | ENSG00000181718 | 11 | 12  | 4  | 5E+05 | 0.027226 | OR5T2   | 0.428559399488927 | 1 |
| COPD-HF | ENSG00000115602 | 2  | 146 | 13 | 5E+05 | 0.027222 | IL1RL1  | 0.428559399488927 | 1 |
| COPD-HF | ENSG00000130703 | 20 | 147 | 15 | 5E+05 | 0.027211 | OSBPL2  | 0.428559399488927 | 1 |
| COPD-HF | ENSG00000166529 | 7  | 16  | 3  | 5E+05 | 0.027208 | ZSCAN21 | 0.428559399488927 | 1 |
| COPD-HF | ENSG00000166813 | 15 | 89  | 10 | 5E+05 | 0.027201 | KIF7    | 0.428559399488927 | 1 |
| COPD-HF | ENSG00000147874 | 9  | 209 | 17 | 5E+05 | 0.02715  | HAUS6   | 0.428559399488927 | 1 |
| COPD-HF | ENSG00000143217 | 1  | 36  | 9  | 5E+05 | 0.026979 | PVRL4   | 0.427604391229579 | 1 |
| COPD-HF | ENSG00000116809 | 1  | 49  | 10 | 5E+05 | 0.026952 | ZBTB17  | 0.427544075731498 | 1 |
| COPD-HF | ENSG00000047849 | 3  | 188 | 11 | 5E+05 | 0.026952 | MAP4    | 0.427544075731498 | 1 |
| COPD-HF | ENSG00000128510 | 7  | 86  | 12 | 5E+05 | 0.026942 | CPA4    | 0.427544075731498 | 1 |

|         |                 |    |      |     |       |          |          |                   |   |
|---------|-----------------|----|------|-----|-------|----------|----------|-------------------|---|
| COPD-HF | ENSG00000107438 | 10 | 169  | 23  | 5E+05 | 0.026865 | PDLIM1   | 0.427267079378775 | 1 |
| COPD-HF | ENSG00000163872 | 3  | 182  | 13  | 5E+05 | 0.026857 | YEATS2   | 0.427267079378775 | 1 |
| COPD-HF | ENSG00000169760 | 3  | 2213 | 125 | 5E+05 | 0.026809 | NLGN1    | 0.427113480553155 | 1 |
| COPD-HF | ENSG00000205189 | 8  | 71   | 11  | 5E+05 | 0.0268   | ZBTB10   | 0.427113480553155 | 1 |
| COPD-HF | ENSG00000106246 | 7  | 91   | 11  | 5E+05 | 0.026741 | PTCD1    | 0.426767838095238 | 1 |
| COPD-HF | ENSG00000110367 | 11 | 71   | 9   | 5E+05 | 0.026706 | DDX6     | 0.426578594454073 | 1 |
| COPD-HF | ENSG00000140391 | 15 | 26   | 5   | 5E+05 | 0.026676 | TSPAN3   | 0.426468957502168 | 1 |
| COPD-HF | ENSG00000136444 | 17 | 11   | 3   | 5E+05 | 0.026646 | RSAD1    | 0.426359130208333 | 1 |
| COPD-HF | ENSG00000122779 | 7  | 167  | 18  | 5E+05 | 0.026525 | TRIM24   | 0.424791768027802 | 1 |
| COPD-HF | ENSG00000166143 | 15 | 17   | 4   | 5E+05 | 0.026471 | PPP1R14D | 0.424295602608696 | 1 |
| COPD-HF | ENSG00000173039 | 11 | 11   | 4   | 5E+05 | 0.026424 | RELA     | 0.423910872062663 | 1 |
| COPD-HF | ENSG00000198646 | 20 | 173  | 12  | 5E+05 | 0.026418 | NCOA6    | 0.423910872062663 | 1 |
| COPD-HF | ENSG00000091592 | 17 | 469  | 18  | 5E+05 | 0.026395 | NLRP1    | 0.423910872062663 | 1 |
| COPD-HF | ENSG00000139436 | 12 | 115  | 15  | 5E+05 | 0.026345 | GIT2     | 0.42374989965096  | 1 |
| COPD-HF | ENSG00000165124 | 9  | 741  | 59  | 5E+05 | 0.026336 | SVEP1    | 0.42374989965096  | 1 |
| COPD-HF | ENSG00000108829 | 17 | 42   | 7   | 5E+05 | 0.026319 | LRRC59   | 0.42374989965096  | 1 |
| COPD-HF | ENSG00000126790 | 14 | 71   | 9   | 5E+05 | 0.026306 | L3HYPDH  | 0.42374989965096  | 1 |
| COPD-HF | ENSG00000165868 | 10 | 241  | 21  | 5E+05 | 0.02625  | HSPA12A  | 0.423700744308231 | 1 |
| COPD-HF | ENSG00000133805 | 11 | 721  | 66  | 5E+05 | 0.026227 | AMPD3    | 0.423700517966696 | 1 |
| COPD-HF | ENSG00000113389 | 5  | 261  | 25  | 5E+05 | 0.026188 | NPR3     | 0.42344158245614  | 1 |
| COPD-HF | ENSG00000163618 | 3  | 1683 | 98  | 5E+05 | 0.026156 | CADPS    | 0.423295476733977 | 1 |
| COPD-HF | ENSG00000115607 | 2  | 133  | 12  | 5E+05 | 0.026144 | IL18RAP  | 0.423295476733977 | 1 |
| COPD-HF | ENSG00000091138 | 7  | 88   | 20  | 5E+05 | 0.026143 | SLC26A3  | 0.423295476733977 | 1 |
| COPD-HF | ENSG00000178295 | 2  | 71   | 12  | 5E+05 | 0.026135 | GEN1     | 0.423295476733977 | 1 |
| COPD-HF | ENSG00000142867 | 1  | 33   | 10  | 5E+05 | 0.026126 | BCL10    | 0.423295476733977 | 1 |
| COPD-HF | ENSG00000117475 | 1  | 68   | 9   | 5E+05 | 0.026114 | BLZF1    | 0.423295476733977 | 1 |
| COPD-HF | ENSG00000105427 | 19 | 3    | 1   | 5E+05 | 0.026079 | CNFN     | 0.423295476733977 | 1 |
| COPD-HF | ENSG00000132510 | 17 | 18   | 5   | 5E+05 | 0.026063 | KDM6B    | 0.423295476733977 | 1 |
| COPD-HF | ENSG00000171700 | 20 | 11   | 4   | 5E+05 | 0.026033 | RGS19    | 0.423295476733977 | 1 |
| COPD-HF | ENSG00000180116 | 12 | 583  | 24  | 5E+05 | 0.026003 | C12orf40 | 0.423295476733977 | 1 |
| COPD-HF | ENSG00000129965 | 11 | 74   | 16  | 5E+05 | 0.025996 | INS-IGF2 | 0.423295476733977 | 1 |
| COPD-HF | ENSG00000035403 | 10 | 172  | 21  | 5E+05 | 0.025955 | VCL      | 0.423295476733977 | 1 |
| COPD-HF | ENSG00000174943 | 16 | 34   | 5   | 5E+05 | 0.025938 | KCTD13   | 0.423295476733977 | 1 |

|         |                 |    |      |    |       |          |            |                   |   |
|---------|-----------------|----|------|----|-------|----------|------------|-------------------|---|
| COPD-HF | ENSG00000196653 | 3  | 11   | 4  | 5E+05 | 0.025859 | ZNF502     | 0.423295476733977 | 1 |
| COPD-HF | ENSG00000255073 | 11 | 70   | 11 | 5E+05 | 0.025802 | ZFP91-CNTF | 0.422762903111111 | 1 |
| COPD-HF | ENSG00000173264 | 11 | 21   | 8  | 5E+05 | 0.025782 | GPR137     | 0.422762903111111 | 1 |
| COPD-HF | ENSG00000139514 | 13 | 213  | 19 | 5E+05 | 0.025769 | SLC7A1     | 0.422762903111111 | 1 |
| COPD-HF | ENSG00000117748 | 1  | 48   | 4  | 5E+05 | 0.025765 | RPA2       | 0.422762903111111 | 1 |
| COPD-HF | ENSG00000197343 | 7  | 29   | 8  | 5E+05 | 0.025745 | ZNF655     | 0.422762903111111 | 1 |
| COPD-HF | ENSG00000119559 | 19 | 27   | 5  | 5E+05 | 0.025687 | C19orf25   | 0.422757563392857 | 1 |
| COPD-HF | ENSG00000101440 | 20 | 94   | 5  | 5E+05 | 0.025565 | ASIP       | 0.421125688114388 | 1 |
| COPD-HF | ENSG00000160472 | 19 | 1    | 1  | 5E+05 | 0.025452 | TMEM190    | 0.419639280858676 | 1 |
| COPD-HF | ENSG00000196586 | 6  | 271  | 16 | 5E+05 | 0.025423 | MYO6       | 0.419536400179051 | 1 |
| COPD-HF | ENSG00000203883 | 20 | 1    | 1  | 5E+05 | 0.025394 | SOX18      | 0.419433335125448 | 1 |
| COPD-HF | ENSG00000170927 | 6  | 1380 | 51 | 5E+05 | 0.025376 | PKHD1      | 0.419433335125448 | 1 |
| COPD-HF | ENSG00000019995 | 10 | 74   | 7  | 5E+05 | 0.025331 | ZRANB1     | 0.419143916517056 | 1 |
| COPD-HF | ENSG00000181333 | 11 | 166  | 14 | 5E+05 | 0.02528  | HEPHL1     | 0.418675867026056 | 1 |
| COPD-HF | ENSG00000064601 | 20 | 16   | 3  | 5E+05 | 0.025229 | CTSA       | 0.418206975719424 | 1 |
| COPD-HF | ENSG00000080709 | 5  | 281  | 31 | 5E+05 | 0.025161 | KCNN2      | 0.417455187218722 | 1 |
| COPD-HF | ENSG00000179751 | 19 | 1    | 1  | 5E+05 | 0.025143 | SYCN       | 0.417455187218722 | 1 |
| COPD-HF | ENSG00000149260 | 11 | 151  | 28 | 5E+05 | 0.025114 | CAPN5      | 0.417426836789901 | 1 |
| COPD-HF | ENSG00000049449 | 11 | 652  | 59 | 5E+05 | 0.025093 | RCN1       | 0.417426836789901 | 1 |
| COPD-HF | ENSG00000166140 | 15 | 14   | 2  | 5E+05 | 0.025092 | ZFYVE19    | 0.417426836789901 | 1 |
| COPD-HF | ENSG00000161956 | 17 | 20   | 7  | 5E+05 | 0.025072 | SEN3       | 0.417426836789901 | 1 |
| COPD-HF | ENSG00000214954 | 8  | 262  | 11 | 5E+05 | 0.025061 | LRRRC69    | 0.417426836789901 | 1 |
| COPD-HF | ENSG00000160752 | 1  | 11   | 2  | 5E+05 | 0.025052 | FDPS       | 0.417426836789901 | 1 |
| COPD-HF | ENSG00000259030 | 1  | 601  | 45 | 5E+05 | 0.024995 | FPGT-TNNI3 | 0.417426836789901 | 1 |
| COPD-HF | ENSG00000116783 | 1  | 601  | 45 | 5E+05 | 0.024995 | TNNI3K     | 0.417426836789901 | 1 |
| COPD-HF | ENSG00000268656 | 2  | 8    | 3  | 5E+05 | 0.024952 | AC110084.1 | 0.417426836789901 | 1 |
| COPD-HF | ENSG00000118557 | 16 | 136  | 14 | 5E+05 | 0.024906 | PMFBP1     | 0.417356634545455 | 1 |
| COPD-HF | ENSG00000167531 | 12 | 3    | 2  | 5E+05 | 0.024902 | LALBA      | 0.417356634545455 | 1 |
| COPD-HF | ENSG00000217236 | 2  | 14   | 5  | 5E+05 | 0.024887 | SP9        | 0.417356634545455 | 1 |
| COPD-HF | ENSG00000165997 | 10 | 57   | 10 | 5E+05 | 0.024822 | ARL5B      | 0.417086532360985 | 1 |
| COPD-HF | ENSG00000161328 | 11 | 83   | 14 | 5E+05 | 0.024815 | LRRRC56    | 0.417086532360985 | 1 |
| COPD-HF | ENSG00000178971 | 17 | 50   | 9  | 5E+05 | 0.024804 | CTC1       | 0.417086532360985 | 1 |
| COPD-HF | ENSG00000163508 | 3  | 7    | 3  | 5E+05 | 0.024764 | EOMES      | 0.417086532360985 | 1 |

|         |                 |    |     |    |       |          |             |                   |   |
|---------|-----------------|----|-----|----|-------|----------|-------------|-------------------|---|
| COPD-HF | ENSG00000169519 | 11 | 274 | 14 | 5E+05 | 0.024709 | METTL15     | 0.416707225068619 | 1 |
| COPD-HF | ENSG00000139370 | 12 | 117 | 9  | 5E+05 | 0.024655 | SLC15A4     | 0.416177303113553 | 1 |
| COPD-HF | ENSG00000160767 | 1  | 16  | 1  | 5E+05 | 0.02464  | FAM189B     | 0.416177303113553 | 1 |
| COPD-HF | ENSG00000213445 | 11 | 20  | 7  | 5E+05 | 0.024605 | SIPA1       | 0.416095380733945 | 1 |
| COPD-HF | ENSG00000136828 | 9  | 447 | 17 | 5E+05 | 0.024557 | RALGPS1     | 0.415664996326905 | 1 |
| COPD-HF | ENSG00000248919 | 7  | 80  | 9  | 5E+05 | 0.024527 | ATP5J2-PTCI | 0.415538778492647 | 1 |
| COPD-HF | ENSG00000100884 | 14 | 11  | 5  | 5E+05 | 0.024525 | CPNE6       | 0.415538778492647 | 1 |
| COPD-HF | ENSG00000266118 | 2  | 205 | 22 | 5E+05 | 0.024386 | RP11-507M3  | 0.413910808471455 | 1 |
| COPD-HF | ENSG00000183657 | 3  | 57  | 7  | 5E+05 | 0.024374 | PP13439     | 0.413910808471455 | 1 |
| COPD-HF | ENSG00000168490 | 8  | 36  | 12 | 5E+05 | 0.024254 | PHYHIP      | 0.412429872693727 | 1 |
| COPD-HF | ENSG00000197361 | 15 | 10  | 4  | 5E+05 | 0.024191 | FBXL22      | 0.411738414589104 | 1 |
| COPD-HF | ENSG00000134571 | 11 | 41  | 11 | 5E+05 | 0.02417  | MYBPC3      | 0.411738414589104 | 1 |
| COPD-HF | ENSG00000136694 | 2  | 6   | 2  | 5E+05 | 0.024037 | IL36A       | 0.409874209990749 | 1 |
| COPD-HF | ENSG00000117676 | 1  | 89  | 11 | 5E+05 | 0.02402  | RPS6KA1     | 0.409874209990749 | 1 |
| COPD-HF | ENSG00000253729 | 8  | 131 | 17 | 5E+05 | 0.023975 | PRKDC       | 0.409574768303985 | 1 |
| COPD-HF | ENSG00000171017 | 19 | 35  | 6  | 5E+05 | 0.023965 | LRRRC8E     | 0.409574768303985 | 1 |
| COPD-HF | ENSG00000167658 | 19 | 25  | 7  | 5E+05 | 0.023937 | EEF2        | 0.409574768303985 | 1 |
| COPD-HF | ENSG00000244694 | 6  | 500 | 39 | 5E+05 | 0.023896 | PTCHD4      | 0.409363353159851 | 1 |
| COPD-HF | ENSG00000268863 | 16 | 2   | 1  | 5E+05 | 0.02381  | AC135048.1  | 0.40826951627907  | 1 |
| COPD-HF | ENSG00000156284 | 21 | 4   | 2  | 5E+05 | 0.023734 | CLDN8       | 0.407345271880819 | 1 |
| COPD-HF | ENSG00000092439 | 15 | 379 | 15 | 5E+05 | 0.023596 | TRPM7       | 0.405354210624418 | 1 |
| COPD-HF | ENSG00000109180 | 4  | 45  | 6  | 5E+05 | 0.023546 | OCIAD1      | 0.40487259141791  | 1 |
| COPD-HF | ENSG00000142655 | 1  | 339 | 23 | 5E+05 | 0.023509 | PEX14       | 0.404613816059757 | 1 |
| COPD-HF | ENSG00000169992 | 17 | 34  | 14 | 5E+05 | 0.023505 | NLGN2       | 0.404613816059757 | 1 |
| COPD-HF | ENSG00000108094 | 10 | 168 | 8  | 5E+05 | 0.023464 | CUL2        | 0.404594866230122 | 1 |
| COPD-HF | ENSG00000120656 | 1  | 54  | 8  | 5E+05 | 0.023435 | TAF12       | 0.404473178838951 | 1 |
| COPD-HF | ENSG00000164626 | 6  | 129 | 23 | 5E+05 | 0.023358 | KCNK5       | 0.403522037488285 | 1 |
| COPD-HF | ENSG00000178718 | 15 | 1   | 1  | 5E+05 | 0.023347 | RPP25       | 0.403522037488285 | 1 |
| COPD-HF | ENSG00000168779 | 3  | 26  | 4  | 5E+05 | 0.023272 | SHOX2       | 0.402791338967136 | 1 |
| COPD-HF | ENSG00000165102 | 8  | 65  | 14 | 5E+05 | 0.023157 | HGSNAT      | 0.401177613721805 | 1 |
| COPD-HF | ENSG00000164346 | 5  | 20  | 4  | 5E+05 | 0.023067 | NSA2        | 0.399994365945437 | 1 |
| COPD-HF | ENSG00000268821 | 2  | 8   | 3  | 5E+05 | 0.022999 | AC068039.1  | 0.399190741054614 | 1 |
| COPD-HF | ENSG00000108306 | 17 | 261 | 9  | 5E+05 | 0.022975 | FBXL20      | 0.399150023562677 | 1 |

|         |                 |    |      |    |       |          |               |                   |   |
|---------|-----------------|----|------|----|-------|----------|---------------|-------------------|---|
| COPD-HF | ENSG0000001617  | 3  | 57   | 8  | 5E+05 | 0.022943 | SEMA3F        | 0.398970112264151 | 1 |
| COPD-HF | ENSG00000119979 | 10 | 71   | 3  | 5E+05 | 0.022908 | FAM45A        | 0.39873764305949  | 1 |
| COPD-HF | ENSG00000233438 | 2  | 43   | 6  | 5E+05 | 0.022879 | AC109829.1    | 0.398609269376181 | 1 |
| COPD-HF | ENSG00000063046 | 12 | 95   | 6  | 5E+05 | 0.022818 | EIF4B         | 0.397922605487228 | 1 |
| COPD-HF | ENSG00000075131 | 15 | 116  | 18 | 5E+05 | 0.022812 | TIPIN         | 0.397922605487228 | 1 |
| COPD-HF | ENSG00000169951 | 16 | 4    | 2  | 5E+05 | 0.022786 | ZNF764        | 0.397922605487228 | 1 |
| COPD-HF | ENSG00000138073 | 2  | 8    | 3  | 5E+05 | 0.022758 | PREB          | 0.397922605487228 | 1 |
| COPD-HF | ENSG00000116396 | 1  | 190  | 20 | 5E+05 | 0.022691 | KCNC4         | 0.397211018993352 | 1 |
| COPD-HF | ENSG00000117834 | 1  | 42   | 9  | 5E+05 | 0.022674 | SLC5A9        | 0.397211018993352 | 1 |
| COPD-HF | ENSG00000212670 | 1  | 3    | 1  | 5E+05 | 0.022657 | AL161915.1    | 0.397211018993352 | 1 |
| COPD-HF | ENSG00000145700 | 5  | 393  | 13 | 5E+05 | 0.022622 | ANKRD31       | 0.397134596190476 | 1 |
| COPD-HF | ENSG00000095794 | 10 | 167  | 7  | 5E+05 | 0.02261  | CREM          | 0.397134596190476 | 1 |
| COPD-HF | ENSG00000196826 | 19 | 226  | 21 | 5E+05 | 0.022593 | ZNF709        | 0.397134596190476 | 1 |
| COPD-HF | ENSG00000123352 | 12 | 301  | 18 | 5E+05 | 0.02258  | SPATS2        | 0.397134596190476 | 1 |
| COPD-HF | ENSG00000127995 | 7  | 80   | 9  | 5E+05 | 0.022568 | CASD1         | 0.397134596190476 | 1 |
| COPD-HF | ENSG00000189050 | 17 | 21   | 5  | 5E+05 | 0.022549 | RNFT1         | 0.397134596190476 | 1 |
| COPD-HF | ENSG00000174236 | 12 | 2    | 1  | 5E+05 | 0.022536 | REP15         | 0.397134596190476 | 1 |
| COPD-HF | ENSG00000241468 | 7  | 36   | 6  | 5E+05 | 0.022498 | ATP5J2        | 0.397134596190476 | 1 |
| COPD-HF | ENSG00000131061 | 20 | 78   | 11 | 5E+05 | 0.022496 | ZNF341        | 0.397134596190476 | 1 |
| COPD-HF | ENSG00000213516 | 1  | 12   | 6  | 5E+05 | 0.022467 | RBMXL1        | 0.397134596190476 | 1 |
| COPD-HF | ENSG00000064932 | 19 | 206  | 27 | 5E+05 | 0.022278 | SBNO2         | 0.394856128846154 | 1 |
| COPD-HF | ENSG00000171695 | 20 | 3    | 1  | 5E+05 | 0.022145 | C20orf201     | 0.392876597690087 | 1 |
| COPD-HF | ENSG00000081019 | 1  | 60   | 11 | 5E+05 | 0.022089 | RSBN1         | 0.392260632947977 | 1 |
| COPD-HF | ENSG00000204876 | 7  | 7    | 2  | 5E+05 | 0.022065 | AC021218.2    | 0.392212290260366 | 1 |
| COPD-HF | ENSG00000079432 | 19 | 22   | 3  | 5E+05 | 0.022051 | CIC           | 0.392212290260366 | 1 |
| COPD-HF | ENSG00000253250 | 8  | 40   | 6  | 5E+05 | 0.022023 | C8orf88       | 0.392212290260366 | 1 |
| COPD-HF | ENSG00000173641 | 1  | 46   | 5  | 5E+05 | 0.021971 | HSPB7         | 0.39167450967118  | 1 |
| COPD-HF | ENSG00000187187 | 19 | 54   | 4  | 5E+05 | 0.02197  | ZNF546        | 0.39167450967118  | 1 |
| COPD-HF | ENSG00000066382 | 11 | 471  | 34 | 5E+05 | 0.021913 | MPPED2        | 0.391397605620155 | 1 |
| COPD-HF | ENSG00000137154 | 9  | 10   | 3  | 5E+05 | 0.021907 | RPS6          | 0.391397605620155 | 1 |
| COPD-HF | ENSG00000148204 | 9  | 68   | 12 | 5E+05 | 0.021862 | CRB2          | 0.391244899029126 | 1 |
| COPD-HF | ENSG00000186094 | 1  | 1933 | 51 | 5E+05 | 0.021846 | AGBL4         | 0.391244899029126 | 1 |
| COPD-HF | ENSG00000250038 | 4  | 103  | 11 | 5E+05 | 0.021831 | RP11-180C1.10 | 0.391244899029126 | 1 |

|         |                 |    |      |    |       |          |              |                   |   |
|---------|-----------------|----|------|----|-------|----------|--------------|-------------------|---|
| COPD-HF | ENSG00000166106 | 11 | 59   | 12 | 5E+05 | 0.021806 | ADAMTS15     | 0.391244899029126 | 1 |
| COPD-HF | ENSG00000143207 | 1  | 448  | 21 | 5E+05 | 0.021795 | RFWD2        | 0.391244899029126 | 1 |
| COPD-HF | ENSG00000100249 | 22 | 7    | 4  | 5E+05 | 0.021794 | C22orf31     | 0.391244899029126 | 1 |
| COPD-HF | ENSG00000115977 | 2  | 228  | 19 | 5E+05 | 0.021687 | AAK1         | 0.390387178710938 | 1 |
| COPD-HF | ENSG00000151422 | 5  | 1453 | 45 | 5E+05 | 0.021658 | FER          | 0.390246250244379 | 1 |
| COPD-HF | ENSG00000153165 | 2  | 8    | 4  | 5E+05 | 0.021657 | RGPD3        | 0.390246250244379 | 1 |
| COPD-HF | ENSG00000111642 | 12 | 70   | 8  | 5E+05 | 0.021604 | CHD4         | 0.390035780607248 | 1 |
| COPD-HF | ENSG00000115252 | 2  | 901  | 40 | 5E+05 | 0.021565 | PDE1A        | 0.38971337745098  | 1 |
| COPD-HF | ENSG00000179909 | 19 | 31   | 7  | 5E+05 | 0.021532 | ZNF154       | 0.389498877330716 | 1 |
| COPD-HF | ENSG00000257138 | 7  | 3    | 1  | 5E+05 | 0.021518 | TAS2R38      | 0.389498877330716 | 1 |
| COPD-HF | ENSG00000186193 | 9  | 22   | 4  | 5E+05 | 0.021482 | SAPCD2       | 0.389358609636185 | 1 |
| COPD-HF | ENSG00000130734 | 19 | 22   | 6  | 5E+05 | 0.021476 | ATG4D        | 0.389358609636185 | 1 |
| COPD-HF | ENSG00000154127 | 11 | 475  | 68 | 5E+05 | 0.02145  | UBASH3B      | 0.389358609636185 | 1 |
| COPD-HF | ENSG00000137575 | 8  | 43   | 3  | 5E+05 | 0.021398 | SDCBP        | 0.388983564102564 | 1 |
| COPD-HF | ENSG00000180347 | 7  | 404  | 29 | 5E+05 | 0.021357 | CCDC129      | 0.38862150148075  | 1 |
| COPD-HF | ENSG00000136381 | 15 | 57   | 9  | 5E+05 | 0.021357 | IREB2        | 0.38862150148075  | 1 |
| COPD-HF | ENSG00000116871 | 1  | 27   | 5  | 5E+05 | 0.021341 | MAP7D1       | 0.38862150148075  | 1 |
| COPD-HF | ENSG00000061794 | 12 | 83   | 11 | 5E+05 | 0.021314 | MRPS35       | 0.38862150148075  | 1 |
| COPD-HF | ENSG00000124203 | 20 | 141  | 25 | 5E+05 | 0.021297 | ZNF831       | 0.38862150148075  | 1 |
| COPD-HF | ENSG00000212734 | 17 | 4    | 1  | 5E+05 | 0.021245 | C17orf100    | 0.388501076388889 | 1 |
| COPD-HF | ENSG00000272647 | 7  | 75   | 11 | 5E+05 | 0.021195 | GS1-259H13.1 | 0.387971633565045 | 1 |
| COPD-HF | ENSG00000186660 | 11 | 66   | 11 | 5E+05 | 0.021168 | ZFP91        | 0.387862568588469 | 1 |
| COPD-HF | ENSG00000222022 | 2  | 2    | 1  | 5E+05 | 0.021142 | AC112721.1   | 0.387771627860697 | 1 |
| COPD-HF | ENSG00000174279 | 2  | 8    | 3  | 5E+05 | 0.021127 | EVX2         | 0.387771627860697 | 1 |
| COPD-HF | ENSG00000088305 | 20 | 122  | 9  | 5E+05 | 0.021122 | DNMT3B       | 0.387771627860697 | 1 |
| COPD-HF | ENSG00000147684 | 8  | 118  | 18 | 5E+05 | 0.02106  | NDUFB9       | 0.387424131736527 | 1 |
| COPD-HF | ENSG00000135547 | 6  | 22   | 3  | 5E+05 | 0.021047 | HEY2         | 0.387424131736527 | 1 |
| COPD-HF | ENSG00000180929 | 3  | 3    | 2  | 5E+05 | 0.021042 | GPR62        | 0.387424131736527 | 1 |
| COPD-HF | ENSG00000023892 | 6  | 40   | 7  | 5E+05 | 0.021036 | DEF6         | 0.387424131736527 | 1 |
| COPD-HF | ENSG00000157404 | 4  | 174  | 23 | 5E+05 | 0.02101  | KIT          | 0.387424131736527 | 1 |
| COPD-HF | ENSG00000187017 | 1  | 100  | 11 | 5E+05 | 0.021004 | ESPN         | 0.387424131736527 | 1 |
| COPD-HF | ENSG00000065308 | 6  | 302  | 26 | 5E+05 | 0.020988 | TRAM2        | 0.387424131736527 | 1 |
| COPD-HF | ENSG00000100461 | 14 | 43   | 5  | 5E+05 | 0.020962 | RBM23        | 0.387424131736527 | 1 |

|         |                 |    |      |    |       |          |              |                   |   |
|---------|-----------------|----|------|----|-------|----------|--------------|-------------------|---|
| COPD-HF | ENSG00000164933 | 8  | 53   | 7  | 5E+05 | 0.020925 | SLC25A32     | 0.387424131736527 | 1 |
| COPD-HF | ENSG00000136944 | 9  | 229  | 34 | 5E+05 | 0.020918 | LMX1B        | 0.387424131736527 | 1 |
| COPD-HF | ENSG00000165553 | 14 | 8    | 4  | 5E+05 | 0.020878 | NGB          | 0.387424131736527 | 1 |
| COPD-HF | ENSG00000108786 | 17 | 12   | 2  | 5E+05 | 0.020839 | HSD17B1      | 0.387424131736527 | 1 |
| COPD-HF | ENSG00000103479 | 16 | 97   | 6  | 5E+05 | 0.020819 | RBL2         | 0.387424131736527 | 1 |
| COPD-HF | ENSG00000110075 | 11 | 211  | 11 | 5E+05 | 0.020798 | PPP6R3       | 0.387424131736527 | 1 |
| COPD-HF | ENSG00000119689 | 14 | 49   | 7  | 5E+05 | 0.02074  | DLST         | 0.386943744939271 | 1 |
| COPD-HF | ENSG00000183379 | 14 | 52   | 7  | 5E+05 | 0.020719 | SYNDIGIL     | 0.386943593718338 | 1 |
| COPD-HF | ENSG00000164934 | 8  | 68   | 8  | 5E+05 | 0.020682 | DCAF13       | 0.386644326572008 | 1 |
| COPD-HF | ENSG00000127616 | 19 | 266  | 19 | 5E+05 | 0.02066  | SMARCA4      | 0.386625157360406 | 1 |
| COPD-HF | ENSG00000101470 | 20 | 26   | 5  | 5E+05 | 0.020635 | TNNC2        | 0.38654975101626  | 1 |
| COPD-HF | ENSG00000111252 | 12 | 34   | 4  | 5E+05 | 0.020633 | SH2B3        | 0.38654975101626  | 1 |
| COPD-HF | ENSG00000166797 | 15 | 49   | 6  | 5E+05 | 0.020603 | FAM96A       | 0.38654975101626  | 1 |
| COPD-HF | ENSG00000204764 | 5  | 754  | 16 | 5E+05 | 0.020593 | RANBP17      | 0.38654975101626  | 1 |
| COPD-HF | ENSG00000172992 | 17 | 89   | 12 | 5E+05 | 0.020589 | DKAKD        | 0.38654975101626  | 1 |
| COPD-HF | ENSG00000140534 | 15 | 119  | 10 | 5E+05 | 0.020355 | TICRR        | 0.383252007150153 | 1 |
| COPD-HF | ENSG00000114554 | 3  | 135  | 16 | 5E+05 | 0.020342 | PLXNA1       | 0.383252007150153 | 1 |
| COPD-HF | ENSG00000084234 | 11 | 214  | 14 | 5E+05 | 0.020302 | APLP2        | 0.383036607983623 | 1 |
| COPD-HF | ENSG00000198522 | 2  | 40   | 6  | 5E+05 | 0.020269 | GPN1         | 0.382805816598361 | 1 |
| COPD-HF | ENSG00000178209 | 8  | 142  | 7  | 5E+05 | 0.020046 | PLEC         | 0.37898248        | 1 |
| COPD-HF | ENSG00000173064 | 12 | 202  | 15 | 5E+05 | 0.019991 | HECTD4       | 0.378330701232033 | 1 |
| COPD-HF | ENSG00000160145 | 3  | 1754 | 87 | 5E+05 | 0.019959 | KALRN        | 0.37811330626927  | 1 |
| COPD-HF | ENSG00000257184 | 7  | 23   | 7  | 5E+05 | 0.019907 | RP1-170O19.2 | 0.377516184156379 | 1 |
| COPD-HF | ENSG00000084676 | 2  | 574  | 24 | 5E+05 | 0.019797 | NCOA1        | 0.37581678784758  | 1 |
| COPD-HF | ENSG00000188368 | 19 | 5    | 1  | 5E+05 | 0.019786 | PRR19        | 0.37581678784758  | 1 |
| COPD-HF | ENSG00000158792 | 16 | 15   | 4  | 5E+05 | 0.019757 | SPATA2L      | 0.37581678784758  | 1 |
| COPD-HF | ENSG00000160097 | 1  | 10   | 3  | 5E+05 | 0.019747 | FNDC5        | 0.37581678784758  | 1 |
| COPD-HF | ENSG00000135549 | 6  | 561  | 34 | 5E+05 | 0.019704 | PKIB         | 0.375598585315408 | 1 |
| COPD-HF | ENSG00000078399 | 7  | 16   | 6  | 5E+05 | 0.019628 | HOXA9        | 0.374537188405797 | 1 |
| COPD-HF | ENSG00000177479 | 3  | 55   | 8  | 5E+05 | 0.019613 | ARIH2        | 0.374537188405797 | 1 |
| COPD-HF | ENSG00000269242 | 19 | 2    | 1  | 5E+05 | 0.019574 | CTD-2192J16  | 0.374281682572614 | 1 |
| COPD-HF | ENSG00000176022 | 1  | 7    | 2  | 5E+05 | 0.019512 | B3GALT6      | 0.373483588785047 | 1 |
| COPD-HF | ENSG00000163154 | 1  | 3    | 1  | 5E+05 | 0.019496 | TNFAIP8L2    | 0.373483588785047 | 1 |

|         |                 |    |     |    |       |          |           |                   |   |
|---------|-----------------|----|-----|----|-------|----------|-----------|-------------------|---|
| COPD-HF | ENSG00000134201 | 1  | 140 | 22 | 5E+05 | 0.019482 | GSTM5     | 0.373483588785047 | 1 |
| COPD-HF | ENSG00000143033 | 1  | 85  | 10 | 5E+05 | 0.019479 | MTF2      | 0.373483588785047 | 1 |
| COPD-HF | ENSG00000136541 | 2  | 5   | 3  | 5E+05 | 0.019402 | ERMN      | 0.372927076120959 | 1 |
| COPD-HF | ENSG00000176160 | 17 | 79  | 12 | 5E+05 | 0.019355 | HSF5      | 0.372412019832985 | 1 |
| COPD-HF | ENSG00000173545 | 5  | 26  | 5  | 5E+05 | 0.019336 | ZNF622    | 0.372412019832985 | 1 |
| COPD-HF | ENSG00000125820 | 20 | 5   | 2  | 5E+05 | 0.019245 | NKX2-2    | 0.371070172594142 | 1 |
| COPD-HF | ENSG00000103966 | 15 | 194 | 26 | 5E+05 | 0.019239 | EHD4      | 0.371070172594142 | 1 |
| COPD-HF | ENSG00000253368 | 1  | 5   | 2  | 5E+05 | 0.019236 | TRNP1     | 0.371070172594142 | 1 |
| COPD-HF | ENSG00000128694 | 2  | 19  | 5  | 5E+05 | 0.019222 | OSGEPL1   | 0.371070172594142 | 1 |
| COPD-HF | ENSG00000251493 | 5  | 3   | 2  | 5E+05 | 0.019204 | FOXD1     | 0.371070172594142 | 1 |
| COPD-HF | ENSG00000186766 | 10 | 6   | 1  | 5E+05 | 0.019196 | FOXI2     | 0.371070172594142 | 1 |
| COPD-HF | ENSG00000153904 | 1  | 637 | 54 | 5E+05 | 0.019193 | DDAH1     | 0.371070172594142 | 1 |
| COPD-HF | ENSG00000185313 | 3  | 294 | 25 | 5E+05 | 0.019175 | SCN10A    | 0.371070172594142 | 1 |
| COPD-HF | ENSG00000159708 | 16 | 96  | 10 | 5E+05 | 0.019132 | LRRC36    | 0.371070172594142 | 1 |
| COPD-HF | ENSG00000180329 | 17 | 14  | 5  | 5E+05 | 0.019131 | CCDC43    | 0.371070172594142 | 1 |
| COPD-HF | ENSG00000172269 | 11 | 28  | 5  | 5E+05 | 0.019123 | DPAGT1    | 0.371070172594142 | 1 |
| COPD-HF | ENSG00000143702 | 1  | 139 | 13 | 5E+05 | 0.019116 | CEP170    | 0.371070172594142 | 1 |
| COPD-HF | ENSG00000113318 | 5  | 573 | 23 | 5E+05 | 0.019114 | MSH3      | 0.371070172594142 | 1 |
| COPD-HF | ENSG00000154511 | 1  | 145 | 6  | 5E+05 | 0.019098 | FAM69A    | 0.371070172594142 | 1 |
| COPD-HF | ENSG00000166526 | 7  | 32  | 9  | 5E+05 | 0.019004 | ZNF3      | 0.371070172594142 | 1 |
| COPD-HF | ENSG00000198836 | 3  | 236 | 14 | 5E+05 | 0.018992 | OPA1      | 0.371070172594142 | 1 |
| COPD-HF | ENSG00000168228 | 4  | 148 | 17 | 5E+05 | 0.018909 | ZCCHC4    | 0.370797443617021 | 1 |
| COPD-HF | ENSG00000178467 | 3  | 11  | 3  | 5E+05 | 0.01885  | P4HTM     | 0.370034132055378 | 1 |
| COPD-HF | ENSG00000125899 | 20 | 3   | 2  | 5E+05 | 0.018794 | C20orf187 | 0.369328147121535 | 1 |
| COPD-HF | ENSG00000125743 | 19 | 6   | 2  | 5E+05 | 0.018783 | SNRPD2    | 0.369328147121535 | 1 |
| COPD-HF | ENSG00000180828 | 8  | 4   | 2  | 5E+05 | 0.01875  | BHLHE22   | 0.369250801282051 | 1 |
| COPD-HF | ENSG00000068001 | 3  | 1   | 1  | 5E+05 | 0.01872  | HYAL2     | 0.369054288770053 | 1 |
| COPD-HF | ENSG00000182631 | 5  | 2   | 1  | 5E+05 | 0.018708 | RXFP3     | 0.369054288770053 | 1 |
| COPD-HF | ENSG00000103064 | 16 | 53  | 8  | 5E+05 | 0.018614 | SLC7A6    | 0.367751191854234 | 1 |
| COPD-HF | ENSG00000175115 | 11 | 263 | 13 | 5E+05 | 0.01852  | PACS1     | 0.366286652360515 | 1 |
| COPD-HF | ENSG00000137760 | 11 | 182 | 18 | 5E+05 | 0.018499 | ALKBH8    | 0.366264303974221 | 1 |
| COPD-HF | ENSG00000173875 | 19 | 36  | 4  | 5E+05 | 0.018478 | ZNF791    | 0.366241907526882 | 1 |
| COPD-HF | ENSG00000184599 | 1  | 16  | 4  | 5E+05 | 0.018444 | FAM19A3   | 0.365961519913886 | 1 |

|         |                 |    |      |     |       |          |           |                   |   |
|---------|-----------------|----|------|-----|-------|----------|-----------|-------------------|---|
| COPD-HF | ENSG00000100401 | 22 | 78   | 10  | 5E+05 | 0.018424 | RANGAP1   | 0.365958612068966 | 1 |
| COPD-HF | ENSG00000175193 | 3  | 157  | 16  | 5E+05 | 0.018385 | PARL      | 0.365577891046386 | 1 |
| COPD-HF | ENSG00000138138 | 10 | 139  | 8   | 5E+05 | 0.018303 | ATAD1     | 0.364340387688985 | 1 |
| COPD-HF | ENSG00000137880 | 15 | 2    | 1   | 5E+05 | 0.018278 | GCHFR     | 0.36423608        | 1 |
| COPD-HF | ENSG00000166508 | 7  | 21   | 4   | 5E+05 | 0.018231 | MCM7      | 0.363692665584416 | 1 |
| COPD-HF | ENSG00000141002 | 16 | 95   | 5   | 5E+05 | 0.018207 | TCF25     | 0.363607400866739 | 1 |
| COPD-HF | ENSG00000165813 | 10 | 93   | 9   | 5E+05 | 0.01815  | C10orf118 | 0.362862201735358 | 1 |
| COPD-HF | ENSG00000070961 | 12 | 175  | 19  | 5E+05 | 0.018141 | ATP2B1    | 0.362862201735358 | 1 |
| COPD-HF | ENSG00000132793 | 20 | 48   | 11  | 5E+05 | 0.01813  | LPIN3     | 0.362862201735358 | 1 |
| COPD-HF | ENSG00000114670 | 3  | 607  | 28  | 5E+05 | 0.018111 | NEK11     | 0.362862201735358 | 1 |
| COPD-HF | ENSG00000092969 | 1  | 191  | 33  | 5E+05 | 0.018026 | TGFB2     | 0.361953440087146 | 1 |
| COPD-HF | ENSG00000204604 | 19 | 75   | 9   | 5E+05 | 0.018025 | ZNF468    | 0.361953440087146 | 1 |
| COPD-HF | ENSG00000152527 | 2  | 462  | 38  | 5E+05 | 0.018    | PLEKHH2   | 0.361953440087146 | 1 |
| COPD-HF | ENSG00000196652 | 7  | 39   | 8   | 5E+05 | 0.017985 | ZKSCAN5   | 0.361953440087146 | 1 |
| COPD-HF | ENSG00000184178 | 4  | 885  | 53  | 5E+05 | 0.017956 | SCFD2     | 0.361953440087146 | 1 |
| COPD-HF | ENSG00000136448 | 17 | 164  | 16  | 5E+05 | 0.01794  | NMT1      | 0.361953440087146 | 1 |
| COPD-HF | ENSG00000235750 | 1  | 100  | 11  | 5E+05 | 0.017929 | KIAA0040  | 0.361953440087146 | 1 |
| COPD-HF | ENSG00000196693 | 10 | 90   | 9   | 5E+05 | 0.017927 | ZNF33B    | 0.361953440087146 | 1 |
| COPD-HF | ENSG00000178882 | 12 | 936  | 75  | 5E+05 | 0.017925 | FAM101A   | 0.361953440087146 | 1 |
| COPD-HF | ENSG00000174684 | 11 | 1    | 1   | 5E+05 | 0.017898 | B3GNT1    | 0.361953440087146 | 1 |
| COPD-HF | ENSG00000149262 | 11 | 240  | 17  | 5E+05 | 0.017878 | INTS4     | 0.361953440087146 | 1 |
| COPD-HF | ENSG00000116604 | 1  | 60   | 8   | 5E+05 | 0.017829 | MEF2D     | 0.361953440087146 | 1 |
| COPD-HF | ENSG00000128699 | 2  | 30   | 5   | 5E+05 | 0.017812 | ORMDL1    | 0.361953440087146 | 1 |
| COPD-HF | ENSG00000051382 | 3  | 211  | 9   | 5E+05 | 0.01776  | PIK3CB    | 0.361734895027624 | 1 |
| COPD-HF | ENSG00000185290 | 7  | 1    | 1   | 5E+05 | 0.017697 | NUPR1L    | 0.360850443584071 | 1 |
| COPD-HF | ENSG00000048471 | 16 | 2174 | 101 | 5E+05 | 0.017605 | SNX29     | 0.359372054263566 | 1 |
| COPD-HF | ENSG00000130368 | 6  | 1    | 1   | 5E+05 | 0.017592 | MAS1      | 0.359372054263566 | 1 |
| COPD-HF | ENSG00000109184 | 4  | 80   | 9   | 5E+05 | 0.017523 | DCUN1D4   | 0.358492185349612 | 1 |
| COPD-HF | ENSG00000173153 | 11 | 9    | 4   | 5E+05 | 0.017516 | ESRRA     | 0.358492185349612 | 1 |
| COPD-HF | ENSG00000143365 | 1  | 55   | 11  | 5E+05 | 0.01749  | RORC      | 0.358492185349612 | 1 |
| COPD-HF | ENSG00000099625 | 19 | 18   | 5   | 5E+05 | 0.017439 | C19orf26  | 0.357965575723831 | 1 |
| COPD-HF | ENSG00000166971 | 16 | 16   | 3   | 5E+05 | 0.017436 | AKTIP     | 0.357965575723831 | 1 |
| COPD-HF | ENSG00000133056 | 1  | 154  | 15  | 5E+05 | 0.017389 | PIK3C2B   | 0.357735978794643 | 1 |

|         |                 |    |     |    |       |          |             |                   |   |
|---------|-----------------|----|-----|----|-------|----------|-------------|-------------------|---|
| COPD-HF | ENSG00000266956 | 17 | 20  | 3  | 5E+05 | 0.017367 | CTB-186H2.3 | 0.357682582122905 | 1 |
| COPD-HF | ENSG00000173113 | 11 | 3   | 1  | 5E+05 | 0.017341 | TRMT112     | 0.357546591722595 | 1 |
| COPD-HF | ENSG00000155099 | 8  | 77  | 10 | 5E+05 | 0.017324 | TMEM55A     | 0.357546591722595 | 1 |
| COPD-HF | ENSG00000016391 | 3  | 92  | 19 | 5E+05 | 0.017317 | CHDH        | 0.357546591722595 | 1 |
| COPD-HF | ENSG00000213413 | 7  | 9   | 3  | 5E+05 | 0.017245 | PVRIG       | 0.356764405162739 | 1 |
| COPD-HF | ENSG00000102970 | 16 | 42  | 11 | 5E+05 | 0.017238 | CCL17       | 0.356764405162739 | 1 |
| COPD-HF | ENSG00000234560 | 11 | 1   | 1  | 5E+05 | 0.017124 | OR10G8      | 0.355058146231721 | 1 |
| COPD-HF | ENSG00000163792 | 2  | 5   | 2  | 5E+05 | 0.017043 | TCF23       | 0.353776597972973 | 1 |
| COPD-HF | ENSG00000197261 | 6  | 47  | 6  | 5E+05 | 0.016971 | C6orf141    | 0.352679191657272 | 1 |
| COPD-HF | ENSG00000173250 | 5  | 4   | 2  | 5E+05 | 0.016867 | GPR151      | 0.350913556433409 | 1 |
| COPD-HF | ENSG00000151617 | 4  | 107 | 11 | 5E+05 | 0.016849 | EDNRA       | 0.350913556433409 | 1 |
| COPD-HF | ENSG00000168071 | 11 | 39  | 8  | 5E+05 | 0.016786 | CCDC88B     | 0.350018481900452 | 1 |
| COPD-HF | ENSG00000174804 | 11 | 8   | 4  | 5E+05 | 0.016742 | FZD4        | 0.3494963601359   | 1 |
| COPD-HF | ENSG00000198146 | 15 | 10  | 4  | 5E+05 | 0.016726 | ZNF770      | 0.3494963601359   | 1 |
| COPD-HF | ENSG00000140153 | 14 | 135 | 14 | 5E+05 | 0.016725 | WDR20       | 0.3494963601359   | 1 |
| COPD-HF | ENSG00000128944 | 15 | 31  | 5  | 5E+05 | 0.016719 | KNSTRN      | 0.3494963601359   | 1 |
| COPD-HF | ENSG00000105429 | 19 | 53  | 3  | 5E+05 | 0.01667  | MEGF8       | 0.3494963601359   | 1 |
| COPD-HF | ENSG00000184117 | 22 | 63  | 7  | 5E+05 | 0.016624 | NIPSNAP1    | 0.349009330296128 | 1 |
| COPD-HF | ENSG00000112200 | 6  | 90  | 8  | 5E+05 | 0.016596 | ZNF451      | 0.348818777651083 | 1 |
| COPD-HF | ENSG00000122574 | 7  | 340 | 30 | 5E+05 | 0.01656  | WIPF3       | 0.348459452054795 | 1 |
| COPD-HF | ENSG00000267981 | 11 | 32  | 4  | 5E+05 | 0.01652  | AP003041.2  | 0.34801504        | 1 |
| COPD-HF | ENSG00000101199 | 20 | 42  | 4  | 5E+05 | 0.016441 | ARFGAP1     | 0.346747085812357 | 1 |
| COPD-HF | ENSG00000177311 | 3  | 225 | 25 | 5E+05 | 0.016414 | ZBTB38      | 0.34657418327606  | 1 |
| COPD-HF | ENSG00000163217 | 2  | 11  | 3  | 5E+05 | 0.016377 | BMP10       | 0.346189496559633 | 1 |
| COPD-HF | ENSG00000242265 | 7  | 12  | 4  | 5E+05 | 0.016374 | PEG10       | 0.346189496559633 | 1 |
| COPD-HF | ENSG00000011114 | 14 | 250 | 18 | 5E+05 | 0.016326 | BTBD7       | 0.345904779310345 | 1 |
| COPD-HF | ENSG00000100003 | 22 | 67  | 12 | 5E+05 | 0.016309 | SEC14L2     | 0.345904779310345 | 1 |
| COPD-HF | ENSG00000115325 | 2  | 7   | 2  | 5E+05 | 0.016287 | DOK1        | 0.345873584101382 | 1 |
| COPD-HF | ENSG00000224470 | 16 | 63  | 10 | 5E+05 | 0.016286 | ATXN1L      | 0.345873584101382 | 1 |
| COPD-HF | ENSG00000091164 | 18 | 83  | 7  | 5E+05 | 0.016256 | TXNL1       | 0.345873584101382 | 1 |
| COPD-HF | ENSG00000214113 | 6  | 484 | 35 | 5E+05 | 0.016235 | LYRM4       | 0.345873584101382 | 1 |
| COPD-HF | ENSG00000077809 | 7  | 50  | 16 | 5E+05 | 0.016226 | GTF2I       | 0.345873584101382 | 1 |
| COPD-HF | ENSG00000130208 | 19 | 8   | 4  | 5E+05 | 0.016211 | APOC1       | 0.345873584101382 | 1 |

|         |                 |    |      |     |       |          |             |                   |   |
|---------|-----------------|----|------|-----|-------|----------|-------------|-------------------|---|
| COPD-HF | ENSG00000151176 | 12 | 53   | 6   | 5E+05 | 0.016111 | PLBD2       | 0.344517474477958 | 1 |
| COPD-HF | ENSG00000205856 | 22 | 31   | 7   | 5E+05 | 0.016091 | C22orf42    | 0.34448943437863  | 1 |
| COPD-HF | ENSG00000164219 | 5  | 106  | 16  | 5E+05 | 0.01605  | PGGT1B      | 0.344011220930233 | 1 |
| COPD-HF | ENSG00000089280 | 16 | 7    | 3   | 5E+05 | 0.016021 | FUS         | 0.343789398137369 | 1 |
| COPD-HF | ENSG00000183023 | 2  | 1686 | 100 | 5E+05 | 0.016006 | SLC8A1      | 0.343789398137369 | 1 |
| COPD-HF | ENSG00000160844 | 7  | 115  | 13  | 5E+05 | 0.016002 | GATS        | 0.343789398137369 | 1 |
| COPD-HF | ENSG00000068078 | 4  | 32   | 7   | 5E+05 | 0.015999 | FGFR3       | 0.343789398137369 | 1 |
| COPD-HF | ENSG00000176046 | 16 | 4    | 2   | 5E+05 | 0.015999 | NUPR1       | 0.343789398137369 | 1 |
| COPD-HF | ENSG00000138381 | 2  | 20   | 5   | 5E+05 | 0.015993 | ASNSD1      | 0.343789398137369 | 1 |
| COPD-HF | ENSG00000203876 | 10 | 21   | 3   | 5E+05 | 0.015964 | RP11-451M15 | 0.343789398137369 | 1 |
| COPD-HF | ENSG00000169885 | 1  | 11   | 3   | 5E+05 | 0.015949 | CALML6      | 0.343789398137369 | 1 |
| COPD-HF | ENSG00000102921 | 16 | 142  | 7   | 5E+05 | 0.015949 | N4BP1       | 0.343789398137369 | 1 |
| COPD-HF | ENSG00000136859 | 9  | 52   | 10  | 5E+05 | 0.015943 | ANGPTL2     | 0.343789398137369 | 1 |
| COPD-HF | ENSG00000070193 | 5  | 129  | 8   | 5E+05 | 0.015917 | FGF10       | 0.343789398137369 | 1 |
| COPD-HF | ENSG00000186472 | 7  | 963  | 39  | 5E+05 | 0.015868 | PCLO        | 0.343789398137369 | 1 |
| COPD-HF | ENSG00000169228 | 5  | 5    | 3   | 5E+05 | 0.015794 | RAB24       | 0.343719955135773 | 1 |
| COPD-HF | ENSG00000215021 | 12 | 7    | 3   | 5E+05 | 0.015766 | PHB2        | 0.3435161678487   | 1 |
| COPD-HF | ENSG00000198933 | 17 | 33   | 8   | 5E+05 | 0.015719 | TBKBP1      | 0.342897428402367 | 1 |
| COPD-HF | ENSG00000146477 | 6  | 209  | 16  | 5E+05 | 0.01571  | SLC22A3     | 0.342897428402367 | 1 |
| COPD-HF | ENSG00000140995 | 16 | 76   | 11  | 5E+05 | 0.015688 | DEF8        | 0.342897428402367 | 1 |
| COPD-HF | ENSG00000198894 | 14 | 34   | 7   | 5E+05 | 0.015657 | CIPC        | 0.34276185391924  | 1 |
| COPD-HF | ENSG00000168827 | 3  | 162  | 8   | 5E+05 | 0.015642 | GFM1        | 0.34276185391924  | 1 |
| COPD-HF | ENSG00000087884 | 11 | 143  | 12  | 5E+05 | 0.01556  | AAMDC       | 0.341449380952381 | 1 |
| COPD-HF | ENSG00000124104 | 20 | 22   | 6   | 5E+05 | 0.01555  | SNX21       | 0.341449380952381 | 1 |
| COPD-HF | ENSG00000165046 | 8  | 27   | 4   | 5E+05 | 0.015518 | LETM2       | 0.341340446300716 | 1 |
| COPD-HF | ENSG00000137221 | 6  | 29   | 6   | 5E+05 | 0.015499 | TJAP1       | 0.341329829151732 | 1 |
| COPD-HF | ENSG00000271810 | 1  | 19   | 6   | 5E+05 | 0.015462 | RP11-426L16 | 0.340922303827751 | 1 |
| COPD-HF | ENSG00000066933 | 15 | 344  | 13  | 5E+05 | 0.015435 | MYO9A       | 0.340734556886228 | 1 |
| COPD-HF | ENSG00000100462 | 14 | 14   | 3   | 5E+05 | 0.015427 | PRMT5       | 0.340734556886228 | 1 |
| COPD-HF | ENSG00000101400 | 20 | 45   | 6   | 5E+05 | 0.015409 | SNTA1       | 0.340734556886228 | 1 |
| COPD-HF | ENSG00000110693 | 11 | 1196 | 50  | 5E+05 | 0.015362 | SOX6        | 0.340345848557692 | 1 |
| COPD-HF | ENSG00000183798 | 20 | 20   | 5   | 5E+05 | 0.015348 | EMILIN3     | 0.340345848557692 | 1 |
| COPD-HF | ENSG00000174963 | 3  | 29   | 8   | 5E+05 | 0.015347 | ZIC4        | 0.340345848557692 | 1 |

|         |                 |    |     |    |       |          |              |                   |   |
|---------|-----------------|----|-----|----|-------|----------|--------------|-------------------|---|
| COPD-HF | ENSG00000100167 | 22 | 48  | 8  | 5E+05 | 0.015337 | SEPT3        | 0.340345848557692 | 1 |
| COPD-HF | ENSG00000103310 | 16 | 39  | 9  | 5E+05 | 0.015293 | ZP2          | 0.340345848557692 | 1 |
| COPD-HF | ENSG00000100296 | 22 | 104 | 10 | 5E+05 | 0.015259 | THOC5        | 0.340107795646917 | 1 |
| COPD-HF | ENSG00000067533 | 1  | 81  | 5  | 5E+05 | 0.015216 | RRP15        | 0.33955996125908  | 1 |
| COPD-HF | ENSG00000129158 | 11 | 402 | 38 | 5E+05 | 0.015188 | SERGEF       | 0.339345944242424 | 1 |
| COPD-HF | ENSG00000214556 | 17 | 20  | 6  | 5E+05 | 0.015095 | C17orf98     | 0.337677348300971 | 1 |
| COPD-HF | ENSG00000065526 | 1  | 129 | 15 | 5E+05 | 0.015029 | SPEN         | 0.33660942527339  | 1 |
| COPD-HF | ENSG00000108443 | 17 | 83  | 11 | 5E+05 | 0.015025 | RPS6KB1      | 0.33660942527339  | 1 |
| COPD-HF | ENSG00000145777 | 5  | 14  | 4  | 5E+05 | 0.014962 | TSLP         | 0.335925147381242 | 1 |
| COPD-HF | ENSG00000251283 | 4  | 21  | 6  | 5E+05 | 0.014961 | RP11-171N4.1 | 0.335925147381242 | 1 |
| COPD-HF | ENSG00000116668 | 1  | 132 | 11 | 5E+05 | 0.014929 | SWT1         | 0.335925147381242 | 1 |
| COPD-HF | ENSG00000204140 | 6  | 31  | 6  | 5E+05 | 0.014916 | CLPSL1       | 0.335925147381242 | 1 |
| COPD-HF | ENSG00000168589 | 16 | 41  | 5  | 5E+05 | 0.014895 | DYNLRB2      | 0.335925147381242 | 1 |
| COPD-HF | ENSG00000242612 | 16 | 18  | 4  | 5E+05 | 0.014885 | DECR2        | 0.335925147381242 | 1 |
| COPD-HF | ENSG00000131351 | 19 | 82  | 11 | 5E+05 | 0.01488  | HAUS8        | 0.335925147381242 | 1 |
| COPD-HF | ENSG00000148399 | 9  | 23  | 5  | 5E+05 | 0.014865 | DPH7         | 0.335925147381242 | 1 |
| COPD-HF | ENSG00000104047 | 15 | 30  | 7  | 5E+05 | 0.014848 | DTWD1        | 0.335925147381242 | 1 |
| COPD-HF | ENSG00000141744 | 17 | 3   | 2  | 5E+05 | 0.014816 | PNMT         | 0.335925147381242 | 1 |
| COPD-HF | ENSG00000162630 | 1  | 9   | 3  | 5E+05 | 0.014805 | B3GALT2      | 0.335925147381242 | 1 |
| COPD-HF | ENSG00000168612 | 20 | 6   | 2  | 5E+05 | 0.014773 | ZSWIM1       | 0.335925147381242 | 1 |
| COPD-HF | ENSG00000072756 | 3  | 75  | 10 | 5E+05 | 0.014771 | TRNT1        | 0.335925147381242 | 1 |
| COPD-HF | ENSG00000163877 | 1  | 40  | 8  | 5E+05 | 0.014748 | SNIP1        | 0.335925147381242 | 1 |
| COPD-HF | ENSG00000196323 | 11 | 91  | 11 | 5E+05 | 0.014741 | ZBTB44       | 0.335925147381242 | 1 |
| COPD-HF | ENSG00000197386 | 4  | 326 | 19 | 5E+05 | 0.014729 | HTT          | 0.335925147381242 | 1 |
| COPD-HF | ENSG00000152977 | 3  | 241 | 22 | 5E+05 | 0.014651 | ZIC1         | 0.3354806         | 1 |
| COPD-HF | ENSG00000134917 | 11 | 69  | 17 | 5E+05 | 0.014597 | ADAMTS8      | 0.334659827114428 | 1 |
| COPD-HF | ENSG00000149926 | 16 | 41  | 6  | 5E+05 | 0.014589 | FAM57B       | 0.334659827114428 | 1 |
| COPD-HF | ENSG00000167528 | 12 | 36  | 7  | 5E+05 | 0.014559 | ZNF641       | 0.334621006234414 | 1 |
| COPD-HF | ENSG00000243789 | 15 | 35  | 6  | 5E+05 | 0.014551 | JMJD7        | 0.334621006234414 | 1 |
| COPD-HF | ENSG00000163681 | 3  | 219 | 19 | 5E+05 | 0.014539 | SLMAP        | 0.334621006234414 | 1 |
| COPD-HF | ENSG00000063015 | 17 | 56  | 9  | 5E+05 | 0.014531 | SEZ6         | 0.334621006234414 | 1 |
| COPD-HF | ENSG00000132394 | 3  | 448 | 16 | 5E+05 | 0.01453  | EEFSEC       | 0.334621006234414 | 1 |
| COPD-HF | ENSG00000005249 | 7  | 235 | 22 | 5E+05 | 0.014503 | PRKAR2B      | 0.334621006234414 | 1 |

|         |                 |    |     |    |       |          |              |                   |   |
|---------|-----------------|----|-----|----|-------|----------|--------------|-------------------|---|
| COPD-HF | ENSG00000132185 | 1  | 29  | 6  | 5E+05 | 0.014411 | FCRLA        | 0.333716033919598 | 1 |
| COPD-HF | ENSG00000159723 | 16 | 3   | 1  | 5E+05 | 0.014366 | AGRP         | 0.333092425157233 | 1 |
| COPD-HF | ENSG00000089234 | 12 | 29  | 5  | 5E+05 | 0.014315 | BRAP         | 0.332327953400504 | 1 |
| COPD-HF | ENSG00000138061 | 2  | 132 | 18 | 5E+05 | 0.014202 | CYP1B1       | 0.330120385876419 | 1 |
| COPD-HF | ENSG00000115970 | 2  | 967 | 36 | 5E+05 | 0.014201 | THADA        | 0.330120385876419 | 1 |
| COPD-HF | ENSG00000124257 | 20 | 3   | 1  | 5E+05 | 0.014185 | NEURL2       | 0.330120385876419 | 1 |
| COPD-HF | ENSG00000147548 | 8  | 122 | 9  | 5E+05 | 0.014178 | WHSC1L1      | 0.330120385876419 | 1 |
| COPD-HF | ENSG00000143793 | 1  | 5   | 3  | 5E+05 | 0.014125 | C1orf35      | 0.329995088719899 | 1 |
| COPD-HF | ENSG00000178226 | 16 | 8   | 3  | 5E+05 | 0.01411  | PRSS36       | 0.329995088719899 | 1 |
| COPD-HF | ENSG00000183346 | 10 | 340 | 21 | 5E+05 | 0.014107 | C10orf107    | 0.329995088719899 | 1 |
| COPD-HF | ENSG00000108344 | 17 | 56  | 6  | 5E+05 | 0.014093 | PSMD3        | 0.329995088719899 | 1 |
| COPD-HF | ENSG00000165816 | 10 | 124 | 19 | 5E+05 | 0.013991 | VWA2         | 0.328530067515924 | 1 |
| COPD-HF | ENSG00000182319 | 8  | 252 | 25 | 5E+05 | 0.013926 | SGK223       | 0.327420864795918 | 1 |
| COPD-HF | ENSG00000143801 | 1  | 72  | 8  | 5E+05 | 0.013924 | PSEN2        | 0.327420864795918 | 1 |
| COPD-HF | ENSG00000108278 | 17 | 18  | 5  | 5E+05 | 0.013908 | ZNHIT3       | 0.327420864795918 | 1 |
| COPD-HF | ENSG00000173457 | 11 | 4   | 1  | 5E+05 | 0.013901 | PPP1R14B     | 0.327420864795918 | 1 |
| COPD-HF | ENSG00000062716 | 17 | 188 | 17 | 5E+05 | 0.013895 | VMP1         | 0.327420864795918 | 1 |
| COPD-HF | ENSG00000101473 | 20 | 35  | 10 | 5E+05 | 0.013875 | ACOT8        | 0.327420864795918 | 1 |
| COPD-HF | ENSG00000163071 | 4  | 83  | 9  | 5E+05 | 0.013873 | SPATA18      | 0.327420864795918 | 1 |
| COPD-HF | ENSG00000082898 | 2  | 93  | 9  | 5E+05 | 0.013863 | XPO1         | 0.327420864795918 | 1 |
| COPD-HF | ENSG00000204842 | 12 | 101 | 7  | 5E+05 | 0.013828 | ATXN2        | 0.327420864795918 | 1 |
| COPD-HF | ENSG00000163947 | 3  | 984 | 86 | 5E+05 | 0.013797 | ARHGEF3      | 0.327420864795918 | 1 |
| COPD-HF | ENSG00000130270 | 19 | 81  | 18 | 5E+05 | 0.013788 | ATP8B3       | 0.327420864795918 | 1 |
| COPD-HF | ENSG00000159714 | 16 | 32  | 6  | 5E+05 | 0.013757 | ZDHHC1       | 0.327420864795918 | 1 |
| COPD-HF | ENSG00000169599 | 2  | 88  | 6  | 5E+05 | 0.013751 | NFU1         | 0.327420864795918 | 1 |
| COPD-HF | ENSG00000164087 | 3  | 85  | 10 | 5E+05 | 0.01366  | POC1A        | 0.326582075226978 | 1 |
| COPD-HF | ENSG00000170923 | 19 | 4   | 1  | 5E+05 | 0.013644 | OR7G2        | 0.326582075226978 | 1 |
| COPD-HF | ENSG00000271786 | 10 | 34  | 5  | 5E+05 | 0.013626 | RP11-139J15. | 0.326582075226978 | 1 |
| COPD-HF | ENSG00000236980 | 3  | 19  | 4  | 5E+05 | 0.013546 | C3orf84      | 0.325121638020833 | 1 |
| COPD-HF | ENSG00000120899 | 8  | 352 | 18 | 5E+05 | 0.013527 | PTK2B        | 0.325088906127771 | 1 |
| COPD-HF | ENSG00000165724 | 9  | 12  | 2  | 5E+05 | 0.013514 | ZMYND19      | 0.325088906127771 | 1 |
| COPD-HF | ENSG00000170571 | 5  | 74  | 7  | 5E+05 | 0.013481 | EMB          | 0.324830422222222 | 1 |
| COPD-HF | ENSG00000100207 | 22 | 350 | 30 | 5E+05 | 0.013466 | TCF20        | 0.324830422222222 | 1 |

|         |                 |    |     |    |       |          |            |                   |   |
|---------|-----------------|----|-----|----|-------|----------|------------|-------------------|---|
| COPD-HF | ENSG0000079257  | 3  | 88  | 7  | 5E+05 | 0.013412 | LXN        | 0.324014935779817 | 1 |
| COPD-HF | ENSG00000243708 | 15 | 68  | 9  | 5E+05 | 0.013408 | PLA2G4B    | 0.324014935779817 | 1 |
| COPD-HF | ENSG00000168970 | 15 | 68  | 9  | 5E+05 | 0.013408 | JMJD7-PLA2 | 0.324014935779817 | 1 |
| COPD-HF | ENSG00000134533 | 12 | 422 | 28 | 5E+05 | 0.013406 | RERG       | 0.324014935779817 | 1 |
| COPD-HF | ENSG00000240583 | 7  | 187 | 34 | 5E+05 | 0.013391 | AQP1       | 0.324014935779817 | 1 |
| COPD-HF | ENSG00000116983 | 1  | 67  | 12 | 5E+05 | 0.013365 | HPCAL4     | 0.324014935779817 | 1 |
| COPD-HF | ENSG00000160716 | 1  | 17  | 6  | 5E+05 | 0.013361 | CHRN2      | 0.324014935779817 | 1 |
| COPD-HF | ENSG00000164746 | 7  | 71  | 8  | 5E+05 | 0.01335  | C7orf57    | 0.324014935779817 | 1 |
| COPD-HF | ENSG00000168758 | 2  | 6   | 3  | 5E+05 | 0.013334 | SEMA4C     | 0.324014935779817 | 1 |
| COPD-HF | ENSG00000099999 | 22 | 113 | 17 | 5E+05 | 0.013321 | RNF215     | 0.324014935779817 | 1 |
| COPD-HF | ENSG00000179941 | 12 | 4   | 2  | 5E+05 | 0.01332  | BBS10      | 0.324014935779817 | 1 |
| COPD-HF | ENSG00000142694 | 1  | 3   | 1  | 5E+05 | 0.013312 | EVA1B      | 0.324014935779817 | 1 |
| COPD-HF | ENSG00000118900 | 16 | 124 | 16 | 5E+05 | 0.013307 | UBN1       | 0.324014935779817 | 1 |
| COPD-HF | ENSG00000250424 | 7  | 182 | 33 | 5E+05 | 0.013268 | AQP1       | 0.324014935779817 | 1 |
| COPD-HF | ENSG00000174840 | 3  | 19  | 5  | 5E+05 | 0.013241 | PDE12      | 0.324014935779817 | 1 |
| COPD-HF | ENSG00000254647 | 11 | 6   | 2  | 5E+05 | 0.013218 | INS        | 0.324014935779817 | 1 |
| COPD-HF | ENSG00000174233 | 12 | 38  | 4  | 5E+05 | 0.013214 | ADCY6      | 0.324014935779817 | 1 |
| COPD-HF | ENSG00000127152 | 14 | 249 | 40 | 5E+05 | 0.013149 | BCL11B     | 0.324014935779817 | 1 |
| COPD-HF | ENSG00000184574 | 12 | 27  | 9  | 5E+05 | 0.013114 | LPAR5      | 0.324014935779817 | 1 |
| COPD-HF | ENSG00000116497 | 1  | 54  | 8  | 5E+05 | 0.01309  | S100BPB    | 0.324014935779817 | 1 |
| COPD-HF | ENSG00000138778 | 4  | 152 | 10 | 5E+05 | 0.013058 | CENPE      | 0.323954393001346 | 1 |
| COPD-HF | ENSG00000128989 | 15 | 62  | 7  | 5E+05 | 0.01303  | ARPP19     | 0.323695404312669 | 1 |
| COPD-HF | ENSG00000268217 | 5  | 11  | 4  | 5E+05 | 0.012945 | AC008387.1 | 0.322017793522267 | 1 |
| COPD-HF | ENSG00000174844 | 3  | 617 | 22 | 5E+05 | 0.01293  | DNAH12     | 0.322017793522267 | 1 |
| COPD-HF | ENSG00000198218 | 3  | 46  | 8  | 5E+05 | 0.012911 | QRICH1     | 0.322017793522267 | 1 |
| COPD-HF | ENSG00000081177 | 14 | 90  | 9  | 5E+05 | 0.012905 | EXD2       | 0.322017793522267 | 1 |
| COPD-HF | ENSG00000073060 | 12 | 312 | 48 | 5E+05 | 0.012884 | SCARB1     | 0.322017793522267 | 1 |
| COPD-HF | ENSG00000070366 | 17 | 524 | 20 | 5E+05 | 0.012863 | SMG6       | 0.322017793522267 | 1 |
| COPD-HF | ENSG00000110011 | 11 | 7   | 3  | 5E+05 | 0.012761 | DNAJC4     | 0.320031990476191 | 1 |
| COPD-HF | ENSG00000101074 | 20 | 52  | 4  | 5E+05 | 0.012735 | R3HDML     | 0.319815061307902 | 1 |
| COPD-HF | ENSG00000107581 | 10 | 60  | 7  | 5E+05 | 0.01271  | EIF3A      | 0.319622687585266 | 1 |
| COPD-HF | ENSG00000243130 | 19 | 62  | 6  | 5E+05 | 0.012572 | PSG11      | 0.316584256830601 | 1 |
| COPD-HF | ENSG00000187513 | 1  | 10  | 3  | 5E+05 | 0.012537 | GJA4       | 0.316134775649795 | 1 |

|         |                 |    |     |    |       |          |          |                   |   |
|---------|-----------------|----|-----|----|-------|----------|----------|-------------------|---|
| COPD-HF | ENSG00000198650 | 16 | 21  | 7  | 5E+05 | 0.012524 | TAT      | 0.316134775649795 | 1 |
| COPD-HF | ENSG00000179958 | 16 | 4   | 2  | 5E+05 | 0.012481 | DCTPP1   | 0.315586108367627 | 1 |
| COPD-HF | ENSG00000070759 | 1  | 203 | 15 | 5E+05 | 0.012324 | TESK2    | 0.312044357142857 | 1 |
| COPD-HF | ENSG00000135436 | 12 | 32  | 7  | 5E+05 | 0.012317 | FAM186B  | 0.312044357142857 | 1 |
| COPD-HF | ENSG00000187266 | 19 | 4   | 2  | 5E+05 | 0.012312 | EPOR     | 0.312044357142857 | 1 |
| COPD-HF | ENSG00000116793 | 1  | 92  | 10 | 5E+05 | 0.012291 | PHTF1    | 0.312044357142857 | 1 |
| COPD-HF | ENSG00000107789 | 10 | 77  | 13 | 5E+05 | 0.012267 | MINPP1   | 0.312044357142857 | 1 |
| COPD-HF | ENSG00000170209 | 11 | 38  | 6  | 5E+05 | 0.012235 | ANKK1    | 0.311933271092669 | 1 |
| COPD-HF | ENSG00000228716 | 5  | 122 | 5  | 5E+05 | 0.012234 | DHFR     | 0.311933271092669 | 1 |
| COPD-HF | ENSG00000128298 | 22 | 49  | 6  | 5E+05 | 0.012165 | BAIAP2L2 | 0.311008938973648 | 1 |
| COPD-HF | ENSG00000213420 | 7  | 8   | 3  | 5E+05 | 0.012142 | GPC2     | 0.310852063888889 | 1 |
| COPD-HF | ENSG00000074855 | 19 | 24  | 7  | 5E+05 | 0.0121   | ANO8     | 0.310207649513213 | 1 |
| COPD-HF | ENSG00000182177 | 2  | 266 | 14 | 5E+05 | 0.012045 | ASB18    | 0.309227694986072 | 1 |
| COPD-HF | ENSG00000197093 | 7  | 11  | 3  | 5E+05 | 0.011973 | GAL3ST4  | 0.307807962343096 | 1 |
| COPD-HF | ENSG00000186314 | 5  | 820 | 30 | 5E+05 | 0.011899 | PRELID2  | 0.306332775139665 | 1 |
| COPD-HF | ENSG00000162522 | 1  | 51  | 13 | 5E+05 | 0.011847 | KIAA1522 | 0.305420630769231 | 1 |
| COPD-HF | ENSG00000167202 | 15 | 209 | 21 | 5E+05 | 0.011794 | TBC1D2B  | 0.304480114845938 | 1 |
| COPD-HF | ENSG00000130598 | 11 | 6   | 3  | 5E+05 | 0.01176  | TNNI2    | 0.304028162692847 | 1 |
| COPD-HF | ENSG00000140983 | 16 | 20  | 4  | 5E+05 | 0.011669 | RHOT2    | 0.302099265449438 | 1 |
| COPD-HF | ENSG00000145283 | 4  | 26  | 7  | 5E+05 | 0.011661 | SLC10A6  | 0.302099265449438 | 1 |
| COPD-HF | ENSG00000176390 | 17 | 158 | 4  | 5E+05 | 0.011655 | CRLF3    | 0.302099265449438 | 1 |
| COPD-HF | ENSG00000115233 | 2  | 139 | 14 | 5E+05 | 0.011651 | PSMD14   | 0.302099265449438 | 1 |
| COPD-HF | ENSG00000167914 | 17 | 44  | 7  | 5E+05 | 0.011629 | GSDMA    | 0.302099265449438 | 1 |
| COPD-HF | ENSG00000119760 | 2  | 8   | 3  | 5E+05 | 0.011628 | SUPT7L   | 0.302099265449438 | 1 |
| COPD-HF | ENSG00000172426 | 6  | 73  | 8  | 5E+05 | 0.011619 | RSPH9    | 0.302099265449438 | 1 |
| COPD-HF | ENSG00000148814 | 10 | 181 | 17 | 5E+05 | 0.011539 | LRRC27   | 0.301699839716312 | 1 |
| COPD-HF | ENSG00000166747 | 16 | 160 | 15 | 5E+05 | 0.011501 | APIG1    | 0.301133427556818 | 1 |
| COPD-HF | ENSG00000135842 | 1  | 340 | 22 | 5E+05 | 0.011477 | FAM129A  | 0.300932490753912 | 1 |
| COPD-HF | ENSG00000161992 | 16 | 17  | 7  | 5E+05 | 0.011475 | C16orf11 | 0.300932490753912 | 1 |
| COPD-HF | ENSG00000103275 | 16 | 111 | 9  | 5E+05 | 0.011466 | UBE2I    | 0.300932490753912 | 1 |
| COPD-HF | ENSG00000118046 | 19 | 96  | 19 | 5E+05 | 0.01145  | STK11    | 0.300932490753912 | 1 |
| COPD-HF | ENSG00000179832 | 8  | 86  | 11 | 5E+05 | 0.011441 | MROH1    | 0.300932490753912 | 1 |
| COPD-HF | ENSG00000162419 | 1  | 58  | 5  | 5E+05 | 0.011421 | GMEB1    | 0.300932490753912 | 1 |

|         |                 |    |     |    |       |          |             |                   |   |
|---------|-----------------|----|-----|----|-------|----------|-------------|-------------------|---|
| COPD-HF | ENSG00000182149 | 16 | 150 | 14 | 5E+05 | 0.011418 | IST1        | 0.300932490753912 | 1 |
| COPD-HF | ENSG00000153827 | 2  | 169 | 18 | 5E+05 | 0.011413 | TRIP12      | 0.300932490753912 | 1 |
| COPD-HF | ENSG00000176020 | 3  | 3   | 2  | 5E+05 | 0.011402 | AMIGO3      | 0.300932490753912 | 1 |
| COPD-HF | ENSG00000173540 | 3  | 3   | 2  | 5E+05 | 0.011402 | GMPPB       | 0.300932490753912 | 1 |
| COPD-HF | ENSG00000101049 | 20 | 73  | 17 | 5E+05 | 0.011384 | SGK2        | 0.300932490753912 | 1 |
| COPD-HF | ENSG00000134684 | 1  | 65  | 9  | 5E+05 | 0.011376 | YARS        | 0.300932490753912 | 1 |
| COPD-HF | ENSG00000108294 | 17 | 25  | 8  | 5E+05 | 0.011268 | PSMB3       | 0.300583276410999 | 1 |
| COPD-HF | ENSG00000108424 | 17 | 38  | 7  | 5E+05 | 0.011258 | KPNB1       | 0.300583276410999 | 1 |
| COPD-HF | ENSG00000236287 | 11 | 123 | 11 | 5E+05 | 0.011235 | ZBED5       | 0.30057293904209  | 1 |
| COPD-HF | ENSG00000127081 | 9  | 65  | 9  | 5E+05 | 0.011156 | ZNF484      | 0.298893238372093 | 1 |
| COPD-HF | ENSG00000060237 | 12 | 323 | 21 | 5E+05 | 0.011139 | WNK1        | 0.298872179039301 | 1 |
| COPD-HF | ENSG00000163879 | 1  | 26  | 6  | 5E+05 | 0.011124 | DNALI1      | 0.298872179039301 | 1 |
| COPD-HF | ENSG00000186451 | 3  | 39  | 8  | 5E+05 | 0.011112 | SPATA12     | 0.298872179039301 | 1 |
| COPD-HF | ENSG00000079102 | 8  | 161 | 7  | 5E+05 | 0.011076 | RUNX1T1     | 0.298485245614035 | 1 |
| COPD-HF | ENSG00000113645 | 5  | 549 | 68 | 5E+05 | 0.011066 | WWC1        | 0.298485245614035 | 1 |
| COPD-HF | ENSG00000188186 | 7  | 8   | 2  | 5E+05 | 0.011022 | LAMTOR4     | 0.297901064516129 | 1 |
| COPD-HF | ENSG00000164162 | 4  | 110 | 16 | 5E+05 | 0.010937 | ANAPC10     | 0.296037769456681 | 1 |
| COPD-HF | ENSG00000137513 | 11 | 314 | 6  | 5E+05 | 0.010877 | NARS2       | 0.294846677941176 | 1 |
| COPD-HF | ENSG00000066923 | 7  | 100 | 8  | 5E+05 | 0.010864 | STAG3       | 0.294846677941176 | 1 |
| COPD-HF | ENSG00000183762 | 22 | 270 | 24 | 5E+05 | 0.010858 | KREMEN1     | 0.294846677941176 | 1 |
| COPD-HF | ENSG00000164451 | 6  | 63  | 8  | 5E+05 | 0.010827 | FAM26D      | 0.294791862629247 | 1 |
| COPD-HF | ENSG00000184349 | 5  | 687 | 85 | 5E+05 | 0.010802 | EFNA5       | 0.29454625147929  | 1 |
| COPD-HF | ENSG00000130177 | 13 | 85  | 10 | 5E+05 | 0.010775 | CDC16       | 0.294245296296296 | 1 |
| COPD-HF | ENSG00000146197 | 6  | 54  | 9  | 5E+05 | 0.010769 | SCUBE3      | 0.294245296296296 | 1 |
| COPD-HF | ENSG00000134461 | 10 | 118 | 13 | 5E+05 | 0.010766 | ANKRD16     | 0.294245296296296 | 1 |
| COPD-HF | ENSG00000178821 | 1  | 6   | 2  | 5E+05 | 0.010761 | TMEM52      | 0.294245296296296 | 1 |
| COPD-HF | ENSG00000072364 | 5  | 167 | 11 | 5E+05 | 0.010745 | AFF4        | 0.294245296296296 | 1 |
| COPD-HF | ENSG00000198055 | 5  | 63  | 16 | 5E+05 | 0.010601 | GRK6        | 0.291654079104478 | 1 |
| COPD-HF | ENSG00000129255 | 17 | 12  | 5  | 5E+05 | 0.010598 | MPDU1       | 0.291654079104478 | 1 |
| COPD-HF | ENSG00000129911 | 19 | 23  | 3  | 5E+05 | 0.010487 | KLF16       | 0.289381543413174 | 1 |
| COPD-HF | ENSG00000198356 | 19 | 4   | 2  | 5E+05 | 0.010476 | ASNA1       | 0.289381543413174 | 1 |
| COPD-HF | ENSG00000125450 | 17 | 43  | 6  | 5E+05 | 0.010468 | NUP85       | 0.289381543413174 | 1 |
| COPD-HF | ENSG00000269693 | 19 | 82  | 14 | 5E+05 | 0.010459 | CTD-2192J16 | 0.289381543413174 | 1 |

|         |                 |    |      |     |       |          |          |                   |   |
|---------|-----------------|----|------|-----|-------|----------|----------|-------------------|---|
| COPD-HF | ENSG00000174791 | 11 | 18   | 5   | 5E+05 | 0.010458 | RIN1     | 0.289381543413174 | 1 |
| COPD-HF | ENSG00000065413 | 2  | 829  | 53  | 5E+05 | 0.01038  | ANKRD44  | 0.288589049773756 | 1 |
| COPD-HF | ENSG00000099814 | 14 | 102  | 11  | 5E+05 | 0.010372 | CEP170B  | 0.288589049773756 | 1 |
| COPD-HF | ENSG00000054392 | 1  | 1221 | 95  | 5E+05 | 0.010362 | HHAT     | 0.288589049773756 | 1 |
| COPD-HF | ENSG00000062524 | 15 | 26   | 7   | 5E+05 | 0.010321 | LTK      | 0.28825301969697  | 1 |
| COPD-HF | ENSG00000115841 | 2  | 403  | 22  | 5E+05 | 0.010269 | RMDN2    | 0.287235928679818 | 1 |
| COPD-HF | ENSG00000078142 | 18 | 174  | 13  | 5E+05 | 0.010249 | PIK3C3   | 0.287112183890578 | 1 |
| COPD-HF | ENSG00000147676 | 8  | 240  | 28  | 5E+05 | 0.010223 | MAL2     | 0.286819724505327 | 1 |
| COPD-HF | ENSG00000111897 | 6  | 64   | 10  | 5E+05 | 0.010177 | SERINC1  | 0.285964391768293 | 1 |
| COPD-HF | ENSG00000065029 | 6  | 74   | 9   | 5E+05 | 0.010167 | ZNF76    | 0.285964391768293 | 1 |
| COPD-HF | ENSG00000101391 | 20 | 37   | 7   | 5E+05 | 0.010155 | CDK5RAP1 | 0.285964391768293 | 1 |
| COPD-HF | ENSG00000128573 | 7  | 797  | 42  | 5E+05 | 0.010072 | FOXP2    | 0.284314205206738 | 1 |
| COPD-HF | ENSG00000125445 | 17 | 8    | 1   | 5E+05 | 0.010072 | MRPS7    | 0.284314205206738 | 1 |
| COPD-HF | ENSG00000187801 | 1  | 45   | 14  | 5E+05 | 0.010048 | ZFP69B   | 0.284314205206738 | 1 |
| COPD-HF | ENSG00000140382 | 15 | 107  | 10  | 5E+05 | 0.009985 | HMG20A   | 0.283164910153846 | 1 |
| COPD-HF | ENSG00000110844 | 12 | 90   | 10  | 5E+05 | 0.009954 | PRPF40B  | 0.28271223220339  | 1 |
| COPD-HF | ENSG00000182901 | 1  | 1732 | 145 | 5E+05 | 0.009923 | RGS7     | 0.282272380092593 | 1 |
| COPD-HF | ENSG00000225968 | 7  | 121  | 15  | 5E+05 | 0.009914 | ELFN1    | 0.282272380092593 | 1 |
| COPD-HF | ENSG00000156735 | 8  | 47   | 3   | 5E+05 | 0.009885 | BAG4     | 0.2820562874613   | 1 |
| COPD-HF | ENSG00000025156 | 6  | 62   | 7   | 5E+05 | 0.009842 | HSF2     | 0.281273290852713 | 1 |
| COPD-HF | ENSG00000085276 | 3  | 1500 | 106 | 5E+05 | 0.009741 | MECOM    | 0.278819160869565 | 1 |
| COPD-HF | ENSG00000182986 | 19 | 125  | 15  | 5E+05 | 0.009661 | ZNF320   | 0.276939341368585 | 1 |
| COPD-HF | ENSG00000164402 | 5  | 78   | 7   | 5E+05 | 0.00966  | SEPT8    | 0.276939341368585 | 1 |
| COPD-HF | ENSG00000153208 | 2  | 414  | 16  | 5E+05 | 0.009653 | MERTK    | 0.276939341368585 | 1 |
| COPD-HF | ENSG00000155100 | 8  | 23   | 4   | 5E+05 | 0.009621 | OTUD6B   | 0.276939341368585 | 1 |
| COPD-HF | ENSG00000072135 | 2  | 21   | 3   | 5E+05 | 0.009599 | PTPN18   | 0.276910391549296 | 1 |
| COPD-HF | ENSG00000184863 | 7  | 347  | 11  | 5E+05 | 0.009581 | RBM33    | 0.276809921159875 | 1 |
| COPD-HF | ENSG00000155366 | 1  | 14   | 4   | 5E+05 | 0.009559 | RHOC     | 0.276610748822606 | 1 |
| COPD-HF | ENSG00000166949 | 15 | 357  | 46  | 5E+05 | 0.009546 | SMAD3    | 0.276610748822606 | 1 |
| COPD-HF | ENSG00000068697 | 2  | 41   | 7   | 5E+05 | 0.009506 | LAPTM4A  | 0.27593185007874  | 1 |
| COPD-HF | ENSG00000167619 | 19 | 6    | 1   | 5E+05 | 0.009502 | TMEM145  | 0.27593185007874  | 1 |
| COPD-HF | ENSG00000160321 | 19 | 257  | 11  | 5E+05 | 0.0095   | ZNF208   | 0.27593185007874  | 1 |
| COPD-HF | ENSG00000149927 | 16 | 27   | 4   | 5E+05 | 0.009475 | DOC2A    | 0.27593185007874  | 1 |

|         |                 |    |      |    |       |          |          |                   |   |
|---------|-----------------|----|------|----|-------|----------|----------|-------------------|---|
| COPD-HF | ENSG00000172922 | 11 | 14   | 4  | 5E+05 | 0.009406 | RNASEH2C | 0.274762706973059 | 1 |
| COPD-HF | ENSG00000254685 | 1  | 90   | 7  | 5E+05 | 0.009381 | FPGT     | 0.274461518253968 | 1 |
| COPD-HF | ENSG00000102984 | 16 | 58   | 8  | 5E+05 | 0.009327 | ZNF821   | 0.273321241812401 | 1 |
| COPD-HF | ENSG00000175745 | 5  | 6    | 2  | 5E+05 | 0.009223 | NR2F1    | 0.270712673566879 | 1 |
| COPD-HF | ENSG00000175202 | 15 | 16   | 5  | 5E+05 | 0.009163 | HIGD2B   | 0.269389328389155 | 1 |
| COPD-HF | ENSG00000101150 | 20 | 62   | 10 | 5E+05 | 0.009155 | TPD52L2  | 0.269389328389155 | 1 |
| COPD-HF | ENSG00000133639 | 12 | 9    | 4  | 5E+05 | 0.009112 | BTG1     | 0.268741343       | 1 |
| COPD-HF | ENSG00000131771 | 17 | 18   | 4  | 5E+05 | 0.009067 | PPP1R1B  | 0.267827945192308 | 1 |
| COPD-HF | ENSG00000166183 | 14 | 72   | 12 | 5E+05 | 0.009059 | ASPG     | 0.267827945192308 | 1 |
| COPD-HF | ENSG00000085788 | 8  | 43   | 5  | 5E+05 | 0.008991 | DDHD2    | 0.266457609163987 | 1 |
| COPD-HF | ENSG00000160208 | 21 | 43   | 4  | 5E+05 | 0.008986 | RRP1B    | 0.266457609163987 | 1 |
| COPD-HF | ENSG00000145879 | 5  | 10   | 2  | 5E+05 | 0.008968 | SPINK7   | 0.266457609163987 | 1 |
| COPD-HF | ENSG00000171680 | 1  | 126  | 21 | 5E+05 | 0.008956 | PLEKHG5  | 0.266457609163987 | 1 |
| COPD-HF | ENSG00000179029 | 17 | 13   | 3  | 5E+05 | 0.008954 | TMEM107  | 0.266457609163987 | 1 |
| COPD-HF | ENSG00000131437 | 5  | 76   | 5  | 5E+05 | 0.008904 | KIF3A    | 0.26600581636953  | 1 |
| COPD-HF | ENSG00000188033 | 19 | 94   | 5  | 5E+05 | 0.008887 | ZNF490   | 0.265931933441558 | 1 |
| COPD-HF | ENSG00000108826 | 17 | 9    | 2  | 5E+05 | 0.00886  | MRPL27   | 0.265543100487805 | 1 |
| COPD-HF | ENSG00000156218 | 15 | 912  | 37 | 5E+05 | 0.008845 | ADAMTSL3 | 0.265537271986971 | 1 |
| COPD-HF | ENSG00000175229 | 11 | 13   | 3  | 5E+05 | 0.008837 | GAL3ST3  | 0.265537271986971 | 1 |
| COPD-HF | ENSG00000040199 | 16 | 168  | 16 | 5E+05 | 0.008819 | PHLPP2   | 0.265537271986971 | 1 |
| COPD-HF | ENSG00000170382 | 1  | 166  | 22 | 5E+05 | 0.008806 | LRRN2    | 0.265537271986971 | 1 |
| COPD-HF | ENSG00000005339 | 16 | 96   | 29 | 5E+05 | 0.00876  | CREBBP   | 0.264694858196721 | 1 |
| COPD-HF | ENSG00000166275 | 10 | 22   | 6  | 5E+05 | 0.008638 | C10orf32 | 0.26146408407225  | 1 |
| COPD-HF | ENSG00000178202 | 11 | 35   | 6  | 5E+05 | 0.008619 | KDEL2    | 0.261296870230263 | 1 |
| COPD-HF | ENSG00000188486 | 11 | 4    | 1  | 5E+05 | 0.008614 | H2AFX    | 0.261296870230263 | 1 |
| COPD-HF | ENSG00000213246 | 17 | 20   | 5  | 5E+05 | 0.008607 | SUPT4H1  | 0.261296870230263 | 1 |
| COPD-HF | ENSG00000107864 | 10 | 283  | 15 | 5E+05 | 0.008589 | CPEB3    | 0.261296870230263 | 1 |
| COPD-HF | ENSG00000170236 | 15 | 141  | 14 | 5E+05 | 0.008506 | USP50    | 0.259584858774834 | 1 |
| COPD-HF | ENSG00000139734 | 13 | 1043 | 28 | 5E+05 | 0.008445 | DIAPH3   | 0.258165933996683 | 1 |
| COPD-HF | ENSG00000059691 | 4  | 191  | 9  | 5E+05 | 0.008442 | PET112   | 0.258165933996683 | 1 |
| COPD-HF | ENSG00000010327 | 3  | 40   | 10 | 5E+05 | 0.008434 | STAB1    | 0.258165933996683 | 1 |
| COPD-HF | ENSG00000153214 | 2  | 117  | 19 | 5E+05 | 0.008414 | TMEM87B  | 0.258165933996683 | 1 |
| COPD-HF | ENSG00000121552 | 3  | 42   | 8  | 5E+05 | 0.008352 | CSTA     | 0.257018796828047 | 1 |

|         |                 |    |      |    |       |          |            |                   |   |
|---------|-----------------|----|------|----|-------|----------|------------|-------------------|---|
| COPD-HF | ENSG00000261459 | 16 | 5    | 3  | 5E+05 | 0.008329 | ZNF747     | 0.256727302842809 | 1 |
| COPD-HF | ENSG00000134697 | 1  | 60   | 10 | 5E+05 | 0.008326 | GNL2       | 0.256727302842809 | 1 |
| COPD-HF | ENSG00000176387 | 16 | 9    | 4  | 5E+05 | 0.008278 | HSD11B2    | 0.256011483389262 | 1 |
| COPD-HF | ENSG00000188266 | 15 | 46   | 3  | 5E+05 | 0.008252 | HYKK       | 0.25565176907563  | 1 |
| COPD-HF | ENSG00000121057 | 17 | 107  | 21 | 5E+05 | 0.008217 | AKAP1      | 0.254977420538721 | 1 |
| COPD-HF | ENSG00000106031 | 7  | 11   | 4  | 5E+05 | 0.008207 | HOXA13     | 0.254977420538721 | 1 |
| COPD-HF | ENSG00000131507 | 5  | 157  | 12 | 5E+05 | 0.008191 | NDFIP1     | 0.254977420538721 | 1 |
| COPD-HF | ENSG00000141279 | 17 | 93   | 10 | 5E+05 | 0.008156 | NPEPPS     | 0.254378518950931 | 1 |
| COPD-HF | ENSG00000188993 | 4  | 24   | 7  | 5E+05 | 0.008114 | LRRC66     | 0.253506862033898 | 1 |
| COPD-HF | ENSG00000268861 | 19 | 347  | 16 | 5E+05 | 0.008098 | CTD-2207O2 | 0.253430278438031 | 1 |
| COPD-HF | ENSG00000177238 | 16 | 6    | 2  | 5E+05 | 0.008089 | TRIM72     | 0.253430278438031 | 1 |
| COPD-HF | ENSG00000169957 | 16 | 3    | 2  | 5E+05 | 0.008039 | ZNF768     | 0.252425333049404 | 1 |
| COPD-HF | ENSG00000221843 | 2  | 7    | 3  | 5E+05 | 0.007999 | C2orf16    | 0.25161988668942  | 1 |
| COPD-HF | ENSG00000140750 | 16 | 147  | 11 | 5E+05 | 0.007976 | ARHGAP17   | 0.251318988034188 | 1 |
| COPD-HF | ENSG00000139990 | 14 | 149  | 17 | 5E+05 | 0.007945 | DCAF5      | 0.250758239383562 | 1 |
| COPD-HF | ENSG00000149557 | 11 | 97   | 13 | 5E+05 | 0.007906 | FEZ1       | 0.24996792109777  | 1 |
| COPD-HF | ENSG00000127990 | 7  | 87   | 8  | 5E+05 | 0.007906 | SGCE       | 0.24996792109777  | 1 |
| COPD-HF | ENSG00000095627 | 10 | 116  | 11 | 5E+05 | 0.007899 | TDRD1      | 0.24996792109777  | 1 |
| COPD-HF | ENSG00000166997 | 7  | 7    | 3  | 5E+05 | 0.007874 | CNPY4      | 0.24996792109777  | 1 |
| COPD-HF | ENSG00000168802 | 16 | 25   | 9  | 5E+05 | 0.007839 | CHTF8      | 0.249574542659758 | 1 |
| COPD-HF | ENSG00000011304 | 19 | 50   | 10 | 5E+05 | 0.007835 | PTBP1      | 0.249574542659758 | 1 |
| COPD-HF | ENSG00000219435 | 11 | 5    | 2  | 5E+05 | 0.007814 | TEX40      | 0.249574542659758 | 1 |
| COPD-HF | ENSG00000169247 | 5  | 341  | 29 | 5E+05 | 0.007806 | SH3TC2     | 0.249574542659758 | 1 |
| COPD-HF | ENSG00000160207 | 21 | 140  | 11 | 5E+05 | 0.007792 | HSF2BP     | 0.249574542659758 | 1 |
| COPD-HF | ENSG00000066405 | 3  | 67   | 9  | 5E+05 | 0.00777  | CLDN18     | 0.249519878048781 | 1 |
| COPD-HF | ENSG00000204909 | 5  | 25   | 2  | 5E+05 | 0.007768 | SPINK9     | 0.249519878048781 | 1 |
| COPD-HF | ENSG00000162004 | 16 | 11   | 3  | 5E+05 | 0.007754 | CCDC78     | 0.249519878048781 | 1 |
| COPD-HF | ENSG00000144824 | 3  | 814  | 43 | 5E+05 | 0.007715 | PHLDB2     | 0.249052104553415 | 1 |
| COPD-HF | ENSG00000105426 | 19 | 569  | 73 | 5E+05 | 0.007687 | PTPRS      | 0.248599726666667 | 1 |
| COPD-HF | ENSG00000187957 | 2  | 1171 | 93 | 5E+05 | 0.007673 | DNER       | 0.248579857469244 | 1 |
| COPD-HF | ENSG00000169126 | 10 | 463  | 23 | 5E+05 | 0.007616 | ARMC4      | 0.24714499084507  | 1 |
| COPD-HF | ENSG00000159322 | 15 | 66   | 10 | 5E+05 | 0.007572 | ADPGK      | 0.246156947795414 | 1 |
| COPD-HF | ENSG00000061987 | 12 | 284  | 18 | 5E+05 | 0.007567 | MON2       | 0.246156947795414 | 1 |

|         |                 |    |      |     |       |          |             |                   |   |
|---------|-----------------|----|------|-----|-------|----------|-------------|-------------------|---|
| COPD-HF | ENSG00000159720 | 16 | 45   | 9   | 5E+05 | 0.007557 | ATP6V0D1    | 0.246156947795414 | 1 |
| COPD-HF | ENSG00000132591 | 17 | 13   | 1   | 5E+05 | 0.007554 | ERAL1       | 0.246156947795414 | 1 |
| COPD-HF | ENSG00000196604 | 2  | 5    | 2   | 5E+05 | 0.007547 | POTEF       | 0.246156947795414 | 1 |
| COPD-HF | ENSG00000104327 | 8  | 55   | 8   | 5E+05 | 0.007523 | CALB1       | 0.246156947795414 | 1 |
| COPD-HF | ENSG00000260869 | 16 | 26   | 8   | 5E+05 | 0.007523 | AC002310.13 | 0.246156947795414 | 1 |
| COPD-HF | ENSG00000068137 | 17 | 7    | 3   | 5E+05 | 0.007501 | PLEKHH3     | 0.246156947795414 | 1 |
| COPD-HF | ENSG00000162910 | 1  | 1    | 1   | 5E+05 | 0.007474 | MRPL55      | 0.246156947795414 | 1 |
| COPD-HF | ENSG00000169592 | 16 | 25   | 5   | 5E+05 | 0.007456 | INO80E      | 0.246156947795414 | 1 |
| COPD-HF | ENSG00000162620 | 1  | 263  | 13  | 5E+05 | 0.00744  | LRRIQ3      | 0.246156947795414 | 1 |
| COPD-HF | ENSG00000183011 | 17 | 54   | 10  | 5E+05 | 0.007433 | LSMD1       | 0.246156947795414 | 1 |
| COPD-HF | ENSG00000115648 | 2  | 329  | 16  | 5E+05 | 0.007425 | MLPH        | 0.246156947795414 | 1 |
| COPD-HF | ENSG00000188501 | 15 | 46   | 9   | 5E+05 | 0.007419 | LCTL        | 0.246156947795414 | 1 |
| COPD-HF | ENSG00000166689 | 11 | 701  | 42  | 5E+05 | 0.0074   | PLEKHA7     | 0.246156947795414 | 1 |
| COPD-HF | ENSG00000150756 | 5  | 123  | 20  | 5E+05 | 0.007395 | FAM173B     | 0.246156947795414 | 1 |
| COPD-HF | ENSG00000117528 | 1  | 101  | 12  | 5E+05 | 0.007373 | ABCD3       | 0.246156947795414 | 1 |
| COPD-HF | ENSG00000090382 | 12 | 19   | 6   | 5E+05 | 0.007349 | LYZ         | 0.246156947795414 | 1 |
| COPD-HF | ENSG00000198780 | 5  | 162  | 10  | 5E+05 | 0.007343 | FAM169A     | 0.246156947795414 | 1 |
| COPD-HF | ENSG00000101203 | 20 | 115  | 11  | 5E+05 | 0.007339 | COL20A1     | 0.246156947795414 | 1 |
| COPD-HF | ENSG00000171055 | 2  | 281  | 18  | 5E+05 | 0.007334 | FEZ2        | 0.246156947795414 | 1 |
| COPD-HF | ENSG00000072163 | 2  | 153  | 27  | 5E+05 | 0.00731  | LIMS2       | 0.246156947795414 | 1 |
| COPD-HF | ENSG00000269095 | 19 | 55   | 13  | 5E+05 | 0.007281 | AC010646.3  | 0.246156947795414 | 1 |
| COPD-HF | ENSG00000113205 | 5  | 8    | 3   | 5E+05 | 0.007267 | PCDHB3      | 0.246156947795414 | 1 |
| COPD-HF | ENSG00000221986 | 1  | 39   | 9   | 5E+05 | 0.007226 | MYBPHL      | 0.245284502394107 | 1 |
| COPD-HF | ENSG00000176349 | 7  | 62   | 8   | 5E+05 | 0.007201 | AC110781.3  | 0.24489362804428  | 1 |
| COPD-HF | ENSG00000173442 | 11 | 24   | 7   | 5E+05 | 0.007156 | EHBP1L1     | 0.243816459704251 | 1 |
| COPD-HF | ENSG00000173065 | 17 | 125  | 6   | 5E+05 | 0.007101 | FAM222B     | 0.242400777037037 | 1 |
| COPD-HF | ENSG00000140830 | 16 | 114  | 12  | 5E+05 | 0.007004 | TXNL4B      | 0.239519564749536 | 1 |
| COPD-HF | ENSG00000184304 | 14 | 1312 | 100 | 5E+05 | 0.00697  | PRKD1       | 0.23881698866171  | 1 |
| COPD-HF | ENSG00000183066 | 22 | 106  | 9   | 5E+05 | 0.006933 | WBP2NL      | 0.237967627188082 | 1 |
| COPD-HF | ENSG00000182511 | 15 | 32   | 6   | 5E+05 | 0.006917 | FES         | 0.237857918843284 | 1 |
| COPD-HF | ENSG00000165511 | 10 | 4    | 2   | 5E+05 | 0.006903 | C10orf25    | 0.237823599626168 | 1 |
| COPD-HF | ENSG00000268126 | 5  | 1    | 1   | 5E+05 | 0.006871 | AC091948.1  | 0.237174718539326 | 1 |
| COPD-HF | ENSG00000106952 | 9  | 90   | 6   | 5E+05 | 0.006859 | TNFSF8      | 0.237174718539326 | 1 |

|         |                 |    |      |    |       |          |              |                   |   |
|---------|-----------------|----|------|----|-------|----------|--------------|-------------------|---|
| COPD-HF | ENSG0000087460  | 20 | 155  | 31 | 5E+05 | 0.006858 | GNAS         | 0.237174718539326 | 1 |
| COPD-HF | ENSG00000257017 | 16 | 6    | 2  | 5E+05 | 0.006836 | HP           | 0.237174718539326 | 1 |
| COPD-HF | ENSG00000145743 | 5  | 1110 | 40 | 5E+05 | 0.006833 | FBXL17       | 0.237174718539326 | 1 |
| COPD-HF | ENSG00000172733 | 8  | 49   | 9  | 5E+05 | 0.006824 | PURG         | 0.237174718539326 | 1 |
| COPD-HF | ENSG00000166938 | 15 | 92   | 16 | 5E+05 | 0.006814 | DIS3L        | 0.237174718539326 | 1 |
| COPD-HF | ENSG00000172201 | 6  | 12   | 5  | 5E+05 | 0.006811 | ID4          | 0.237174718539326 | 1 |
| COPD-HF | ENSG00000172366 | 16 | 5    | 2  | 5E+05 | 0.006785 | FAM195A      | 0.237174718539326 | 1 |
| COPD-HF | ENSG00000198920 | 17 | 177  | 16 | 5E+05 | 0.006752 | KIAA0753     | 0.237079979428571 | 1 |
| COPD-HF | ENSG00000149932 | 16 | 40   | 5  | 5E+05 | 0.00675  | TMEM219      | 0.237079979428571 | 1 |
| COPD-HF | ENSG00000108590 | 17 | 38   | 6  | 5E+05 | 0.006744 | MED31        | 0.237079979428571 | 1 |
| COPD-HF | ENSG00000141314 | 17 | 168  | 24 | 5E+05 | 0.006708 | RHBDL3       | 0.236885237356322 | 1 |
| COPD-HF | ENSG00000148795 | 10 | 18   | 3  | 5E+05 | 0.006637 | CYP17A1      | 0.234810238771593 | 1 |
| COPD-HF | ENSG00000145332 | 4  | 143  | 17 | 5E+05 | 0.00663  | KLHL8        | 0.234810238771593 | 1 |
| COPD-HF | ENSG00000015532 | 17 | 30   | 4  | 5E+05 | 0.006599 | XYLT2        | 0.23436547283237  | 1 |
| COPD-HF | ENSG00000091536 | 17 | 131  | 17 | 5E+05 | 0.00657  | MYO15A       | 0.233778835521236 | 1 |
| COPD-HF | ENSG00000174197 | 15 | 247  | 19 | 5E+05 | 0.006459 | MGA          | 0.230301973307544 | 1 |
| COPD-HF | ENSG00000159479 | 1  | 4    | 2  | 5E+05 | 0.006458 | MED8         | 0.230301973307544 | 1 |
| COPD-HF | ENSG00000263620 | 17 | 25   | 5  | 5E+05 | 0.006454 | RP11-599B13  | 0.230301973307544 | 1 |
| COPD-HF | ENSG00000268241 | 2  | 2    | 1  | 5E+05 | 0.006433 | AC018470.1   | 0.230301973307544 | 1 |
| COPD-HF | ENSG00000162777 | 1  | 42   | 14 | 5E+05 | 0.006429 | DENND2D      | 0.230301973307544 | 1 |
| COPD-HF | ENSG00000258512 | 14 | 7    | 1  | 5E+05 | 0.006396 | RP11-796G6.1 | 0.2302684921875   | 1 |
| COPD-HF | ENSG00000165895 | 11 | 1187 | 52 | 5E+05 | 0.00638  | ARHGAP42     | 0.230149171428571 | 1 |
| COPD-HF | ENSG00000257955 | 12 | 25   | 5  | 5E+05 | 0.006379 | RP1-228P16.5 | 0.230149171428571 | 1 |
| COPD-HF | ENSG00000170522 | 4  | 437  | 56 | 5E+05 | 0.006352 | ELOVL6       | 0.230021387229862 | 1 |
| COPD-HF | ENSG00000156427 | 5  | 76   | 15 | 5E+05 | 0.006336 | FGF18        | 0.229886361220472 | 1 |
| COPD-HF | ENSG00000213533 | 3  | 106  | 8  | 5E+05 | 0.006328 | TMEM110      | 0.229886361220472 | 1 |
| COPD-HF | ENSG00000182179 | 3  | 6    | 2  | 5E+05 | 0.006311 | UBA7         | 0.229886361220472 | 1 |
| COPD-HF | ENSG00000108242 | 10 | 128  | 14 | 5E+05 | 0.006279 | CYP2C18      | 0.229175116435644 | 1 |
| COPD-HF | ENSG00000240891 | 3  | 535  | 34 | 5E+05 | 0.006257 | PLCXD2       | 0.228850815277778 | 1 |
| COPD-HF | ENSG00000139318 | 12 | 26   | 5  | 5E+05 | 0.006239 | DUSP6        | 0.228616839960239 | 1 |
| COPD-HF | ENSG00000137474 | 11 | 250  | 26 | 5E+05 | 0.00618  | MYO7A        | 0.226938870916335 | 1 |
| COPD-HF | ENSG00000198380 | 2  | 110  | 6  | 5E+05 | 0.006166 | GFPT1        | 0.226862031936128 | 1 |
| COPD-HF | ENSG00000114349 | 3  | 2    | 1  | 5E+05 | 0.006131 | GNAT1        | 0.226018073       | 1 |

|         |                 |    |     |    |       |          |            |                   |   |
|---------|-----------------|----|-----|----|-------|----------|------------|-------------------|---|
| COPD-HF | ENSG00000149131 | 11 | 36  | 4  | 5E+05 | 0.006123 | SERPING1   | 0.226018073       | 1 |
| COPD-HF | ENSG00000089009 | 12 | 10  | 4  | 5E+05 | 0.006112 | RPL6       | 0.226018073       | 1 |
| COPD-HF | ENSG00000153495 | 13 | 113 | 19 | 5E+05 | 0.006105 | TEX29      | 0.226018073       | 1 |
| COPD-HF | ENSG00000196092 | 9  | 684 | 57 | 5E+05 | 0.006092 | PAX5       | 0.226018073       | 1 |
| COPD-HF | ENSG00000116685 | 1  | 18  | 5  | 5E+05 | 0.00607  | KIAA2013   | 0.226018073       | 1 |
| COPD-HF | ENSG00000162992 | 2  | 7   | 2  | 5E+05 | 0.006065 | NEUROD1    | 0.226018073       | 1 |
| COPD-HF | ENSG00000090905 | 16 | 143 | 14 | 5E+05 | 0.006026 | TNRC6A     | 0.225297622920893 | 1 |
| COPD-HF | ENSG00000185888 | 1  | 100 | 16 | 5E+05 | 0.006014 | PRSS38     | 0.225297622920893 | 1 |
| COPD-HF | ENSG00000116514 | 1  | 48  | 6  | 5E+05 | 0.006011 | RNF19B     | 0.225297622920893 | 1 |
| COPD-HF | ENSG00000180336 | 17 | 27  | 9  | 5E+05 | 0.00597  | C17orf104  | 0.22457036755102  | 1 |
| COPD-HF | ENSG00000197128 | 19 | 38  | 4  | 5E+05 | 0.005935 | ZNF772     | 0.223725354396728 | 1 |
| COPD-HF | ENSG00000129167 | 11 | 41  | 5  | 5E+05 | 0.005921 | TPH1       | 0.223639883401639 | 1 |
| COPD-HF | ENSG00000133275 | 19 | 114 | 12 | 5E+05 | 0.005918 | CSNK1G2    | 0.223639883401639 | 1 |
| COPD-HF | ENSG00000128965 | 15 | 5   | 2  | 5E+05 | 0.005893 | CHAC1      | 0.223513399794239 | 1 |
| COPD-HF | ENSG00000115947 | 2  | 125 | 9  | 5E+05 | 0.005825 | ORC4       | 0.221367027835052 | 1 |
| COPD-HF | ENSG00000138668 | 4  | 43  | 5  | 5E+05 | 0.005813 | HNRNPD     | 0.221367027835052 | 1 |
| COPD-HF | ENSG00000162040 | 16 | 33  | 4  | 5E+05 | 0.005807 | HS3ST6     | 0.221367027835052 | 1 |
| COPD-HF | ENSG00000180098 | 1  | 35  | 6  | 5E+05 | 0.005744 | TRNAU1AP   | 0.219673939004149 | 1 |
| COPD-HF | ENSG00000137944 | 1  | 98  | 7  | 5E+05 | 0.005731 | CCBL2      | 0.219640116839917 | 1 |
| COPD-HF | ENSG00000104447 | 8  | 482 | 21 | 5E+05 | 0.00571  | TRPS1      | 0.219287416458333 | 1 |
| COPD-HF | ENSG00000133069 | 1  | 118 | 13 | 5E+05 | 0.005683 | TMCC2      | 0.218710046346555 | 1 |
| COPD-HF | ENSG00000196387 | 12 | 5   | 1  | 5E+05 | 0.005683 | ZNF140     | 0.218710046346555 | 1 |
| COPD-HF | ENSG00000205883 | 8  | 11  | 3  | 5E+05 | 0.005675 | DEFB135    | 0.218710046346555 | 1 |
| COPD-HF | ENSG00000140832 | 16 | 30  | 6  | 5E+05 | 0.00566  | MARVELD3   | 0.218710046346555 | 1 |
| COPD-HF | ENSG00000155363 | 1  | 51  | 9  | 5E+05 | 0.00565  | MOV10      | 0.218710046346555 | 1 |
| COPD-HF | ENSG00000176182 | 19 | 39  | 7  | 5E+05 | 0.005602 | MYPOP      | 0.217839949578059 | 1 |
| COPD-HF | ENSG00000101210 | 20 | 46  | 12 | 5E+05 | 0.0056   | EEF1A2     | 0.217839949578059 | 1 |
| COPD-HF | ENSG00000205971 | 7  | 4   | 2  | 5E+05 | 0.005548 | AC074389.6 | 0.216654140042373 | 1 |
| COPD-HF | ENSG00000108669 | 17 | 133 | 13 | 5E+05 | 0.005468 | CYTH1      | 0.213979343524416 | 1 |
| COPD-HF | ENSG00000198492 | 1  | 43  | 6  | 5E+05 | 0.005414 | YTHDF2     | 0.212340316170213 | 1 |
| COPD-HF | ENSG00000248592 | 3  | 116 | 9  | 5E+05 | 0.005411 | TMEM110-M  | 0.212340316170213 | 1 |
| COPD-HF | ENSG00000138435 | 2  | 43  | 6  | 5E+05 | 0.00541  | CHRNA1     | 0.212340316170213 | 1 |
| COPD-HF | ENSG00000122406 | 1  | 9   | 3  | 5E+05 | 0.005367 | RPL5       | 0.211821615631692 | 1 |

|         |                 |    |      |     |       |          |              |                   |   |
|---------|-----------------|----|------|-----|-------|----------|--------------|-------------------|---|
| COPD-HF | ENSG00000118369 | 11 | 45   | 8   | 5E+05 | 0.005318 | USP35        | 0.210349801287554 | 1 |
| COPD-HF | ENSG00000130592 | 11 | 173  | 27  | 5E+05 | 0.005299 | LSP1         | 0.210068810537634 | 1 |
| COPD-HF | ENSG00000215910 | 1  | 142  | 11  | 5E+05 | 0.005296 | C1orf167     | 0.210068810537634 | 1 |
| COPD-HF | ENSG00000008838 | 17 | 79   | 8   | 5E+05 | 0.005282 | MED24        | 0.210068810537634 | 1 |
| COPD-HF | ENSG00000261701 | 16 | 36   | 7   | 5E+05 | 0.005275 | HPR          | 0.210068810537634 | 1 |
| COPD-HF | ENSG00000115138 | 2  | 14   | 6   | 5E+05 | 0.005268 | POMC         | 0.210068810537634 | 1 |
| COPD-HF | ENSG00000163029 | 2  | 246  | 22  | 5E+05 | 0.005182 | SMC6         | 0.207631716304348 | 1 |
| COPD-HF | ENSG00000188334 | 19 | 96   | 13  | 5E+05 | 0.005145 | BSPH1        | 0.206602204357298 | 1 |
| COPD-HF | ENSG00000171105 | 19 | 658  | 68  | 5E+05 | 0.005101 | INSR         | 0.205302568340611 | 1 |
| COPD-HF | ENSG00000117477 | 1  | 169  | 17  | 5E+05 | 0.005068 | CCDC181      | 0.2044086595186   | 1 |
| COPD-HF | ENSG00000121797 | 3  | 18   | 4   | 5E+05 | 0.005033 | CCRL2        | 0.203458279824561 | 1 |
| COPD-HF | ENSG00000140459 | 15 | 42   | 7   | 5E+05 | 0.005009 | CYP11A1      | 0.202908843516484 | 1 |
| COPD-HF | ENSG00000100156 | 22 | 12   | 4   | 5E+05 | 0.004989 | SLC16A8      | 0.202568113656388 | 1 |
| COPD-HF | ENSG00000141101 | 16 | 25   | 7   | 5E+05 | 0.004974 | NOB1         | 0.20237643598234  | 1 |
| COPD-HF | ENSG00000103254 | 16 | 6    | 1   | 5E+05 | 0.004972 | FAM173A      | 0.20237643598234  | 1 |
| COPD-HF | ENSG00000133706 | 5  | 236  | 6   | 5E+05 | 0.004964 | LARS         | 0.20237643598234  | 1 |
| COPD-HF | ENSG00000164338 | 5  | 37   | 4   | 5E+05 | 0.004922 | UTP15        | 0.201599672888889 | 1 |
| COPD-HF | ENSG00000102886 | 16 | 16   | 6   | 5E+05 | 0.004917 | GDPD3        | 0.201599672888889 | 1 |
| COPD-HF | ENSG00000173626 | 6  | 134  | 12  | 5E+05 | 0.0049   | TRAPPC3L     | 0.201594479464286 | 1 |
| COPD-HF | ENSG00000172977 | 11 | 22   | 5   | 5E+05 | 0.004855 | KAT5         | 0.200185678970917 | 1 |
| COPD-HF | ENSG00000168772 | 4  | 25   | 4   | 5E+05 | 0.004848 | CXXC4        | 0.200185678970917 | 1 |
| COPD-HF | ENSG00000163069 | 4  | 21   | 4   | 5E+05 | 0.004824 | SGCB         | 0.199834431235955 | 1 |
| COPD-HF | ENSG00000267534 | 19 | 13   | 4   | 5E+05 | 0.004799 | S1PR2        | 0.199225856756757 | 1 |
| COPD-HF | ENSG00000253958 | 8  | 15   | 2   | 5E+05 | 0.004716 | CLDN23       | 0.196217828668172 | 1 |
| COPD-HF | ENSG00000104880 | 19 | 323  | 14  | 5E+05 | 0.004703 | ARHGEF18     | 0.196111272624434 | 1 |
| COPD-HF | ENSG00000169955 | 16 | 6    | 3   | 5E+05 | 0.004701 | ZNF747       | 0.196111272624434 | 1 |
| COPD-HF | ENSG00000117281 | 1  | 4    | 1   | 5E+05 | 0.004686 | CD160        | 0.196111272624434 | 1 |
| COPD-HF | ENSG00000169344 | 16 | 55   | 6   | 5E+05 | 0.004664 | UMOD         | 0.195813884965831 | 1 |
| COPD-HF | ENSG00000075239 | 11 | 44   | 7   | 5E+05 | 0.00463  | ACAT1        | 0.194859535616438 | 1 |
| COPD-HF | ENSG00000169223 | 5  | 24   | 4   | 5E+05 | 0.004605 | LMAN2        | 0.194246700915332 | 1 |
| COPD-HF | ENSG00000074201 | 11 | 229  | 19  | 5E+05 | 0.004594 | CLNS1A       | 0.194210257110092 | 1 |
| COPD-HF | ENSG00000128285 | 22 | 7    | 2   | 5E+05 | 0.00457  | MCHR1        | 0.193635486896552 | 1 |
| COPD-HF | ENSG00000253350 | 8  | 1987 | 103 | 5E+05 | 0.004547 | RP11-127H5.1 | 0.193126023732719 | 1 |

|         |                 |    |     |    |       |          |            |                   |   |
|---------|-----------------|----|-----|----|-------|----------|------------|-------------------|---|
| COPD-HF | ENSG00000129282 | 17 | 11  | 3  | 5E+05 | 0.004542 | MRM1       | 0.193126023732719 | 1 |
| COPD-HF | ENSG00000156110 | 10 | 777 | 24 | 5E+05 | 0.004536 | ADK        | 0.193126023732719 | 1 |
| COPD-HF | ENSG00000132781 | 1  | 14  | 6  | 5E+05 | 0.004521 | MUTYH      | 0.193126023732719 | 1 |
| COPD-HF | ENSG00000130517 | 19 | 89  | 17 | 5E+05 | 0.004491 | PGPEP1     | 0.192513394651163 | 1 |
| COPD-HF | ENSG00000198758 | 1  | 41  | 11 | 5E+05 | 0.004488 | EPS8L3     | 0.192513394651163 | 1 |
| COPD-HF | ENSG00000174839 | 3  | 125 | 15 | 5E+05 | 0.004441 | DENND6A    | 0.191263908878505 | 1 |
| COPD-HF | ENSG00000173261 | 5  | 46  | 2  | 5E+05 | 0.004436 | PLAC8L1    | 0.191263908878505 | 1 |
| COPD-HF | ENSG00000149295 | 11 | 166 | 21 | 5E+05 | 0.004419 | DRD2       | 0.191201268544601 | 1 |
| COPD-HF | ENSG00000197150 | 7  | 46  | 9  | 5E+05 | 0.004389 | ABCB8      | 0.190367349647059 | 1 |
| COPD-HF | ENSG00000196748 | 6  | 7   | 3  | 5E+05 | 0.004361 | CLPSL2     | 0.189603403066038 | 1 |
| COPD-HF | ENSG00000188452 | 2  | 337 | 22 | 5E+05 | 0.004353 | CERKL      | 0.189603403066038 | 1 |
| COPD-HF | ENSG00000151006 | 16 | 12  | 3  | 5E+05 | 0.004342 | PRSS53     | 0.189603403066038 | 1 |
| COPD-HF | ENSG00000196355 | 4  | 91  | 14 | 5E+05 | 0.004328 | AC021860.1 | 0.189500872446556 | 1 |
| COPD-HF | ENSG00000109787 | 4  | 73  | 15 | 5E+05 | 0.004324 | KLF3       | 0.189500872446556 | 1 |
| COPD-HF | ENSG00000170959 | 11 | 637 | 20 | 5E+05 | 0.004313 | DCDC1      | 0.189500872446556 | 1 |
| COPD-HF | ENSG00000125630 | 2  | 91  | 10 | 5E+05 | 0.004308 | POLR1B     | 0.189500872446556 | 1 |
| COPD-HF | ENSG00000121905 | 1  | 13  | 3  | 5E+05 | 0.004288 | HPCA       | 0.189500872446556 | 1 |
| COPD-HF | ENSG00000100372 | 22 | 57  | 7  | 5E+05 | 0.004288 | SLC25A17   | 0.189500872446556 | 1 |
| COPD-HF | ENSG00000143499 | 1  | 177 | 20 | 5E+05 | 0.004258 | SMYD2      | 0.189104813253012 | 1 |
| COPD-HF | ENSG00000180198 | 1  | 57  | 7  | 5E+05 | 0.004174 | RCC1       | 0.185857178502415 | 1 |
| COPD-HF | ENSG00000146674 | 7  | 19  | 6  | 5E+05 | 0.004157 | IGFBP3     | 0.185517210169492 | 1 |
| COPD-HF | ENSG00000205593 | 22 | 63  | 10 | 5E+05 | 0.004138 | DENND6B    | 0.185144273300971 | 1 |
| COPD-HF | ENSG00000145868 | 5  | 60  | 4  | 5E+05 | 0.004132 | FBXO38     | 0.185144273300971 | 1 |
| COPD-HF | ENSG00000114999 | 2  | 99  | 10 | 5E+05 | 0.004099 | TTL        | 0.184289537317073 | 1 |
| COPD-HF | ENSG00000169230 | 5  | 10  | 5  | 5E+05 | 0.004078 | PRELID1    | 0.183793685330073 | 1 |
| COPD-HF | ENSG00000157851 | 2  | 122 | 7  | 5E+05 | 0.004063 | DPYSL5     | 0.183570994117647 | 1 |
| COPD-HF | ENSG00000175324 | 8  | 18  | 5  | 5E+05 | 0.004027 | LSM1       | 0.182364417199017 | 1 |
| COPD-HF | ENSG00000187778 | 12 | 15  | 4  | 5E+05 | 0.004016 | MCRS1      | 0.182332334975369 | 1 |
| COPD-HF | ENSG00000149596 | 20 | 269 | 34 | 5E+05 | 0.004008 | JPH2       | 0.182332334975369 | 1 |
| COPD-HF | ENSG00000105722 | 19 | 8   | 1  | 5E+05 | 0.003957 | ERF        | 0.180524771782178 | 1 |
| COPD-HF | ENSG00000177733 | 5  | 1   | 1  | 5E+05 | 0.003951 | HNRNPA0    | 0.180524771782178 | 1 |
| COPD-HF | ENSG00000127337 | 12 | 111 | 11 | 5E+05 | 0.003924 | YEATS4     | 0.179918918905473 | 1 |
| COPD-HF | ENSG00000157322 | 16 | 1   | 1  | 5E+05 | 0.003912 | CLEC18A    | 0.179802193266833 | 1 |

|         |                 |    |      |    |       |          |             |                   |   |
|---------|-----------------|----|------|----|-------|----------|-------------|-------------------|---|
| COPD-HF | ENSG0000007541  | 16 | 52   | 4  | 5E+05 | 0.003906 | PIGQ        | 0.179802193266833 | 1 |
| COPD-HF | ENSG00000121989 | 2  | 93   | 10 | 5E+05 | 0.003902 | ACVR2A      | 0.179802193266833 | 1 |
| COPD-HF | ENSG00000119772 | 2  | 182  | 34 | 5E+05 | 0.003835 | DNMT3A      | 0.177600565577889 | 1 |
| COPD-HF | ENSG00000177981 | 12 | 80   | 11 | 5E+05 | 0.003831 | ASB8        | 0.177600565577889 | 1 |
| COPD-HF | ENSG00000171456 | 20 | 91   | 7  | 5E+05 | 0.003829 | ASXL1       | 0.177600565577889 | 1 |
| COPD-HF | ENSG00000037042 | 17 | 8    | 3  | 5E+05 | 0.003794 | TUBG2       | 0.177031465316456 | 1 |
| COPD-HF | ENSG00000126351 | 17 | 50   | 12 | 5E+05 | 0.003784 | THRA        | 0.177008262690355 | 1 |
| COPD-HF | ENSG00000112282 | 6  | 40   | 8  | 5E+05 | 0.00378  | MED23       | 0.177008262690355 | 1 |
| COPD-HF | ENSG00000105723 | 19 | 12   | 3  | 5E+05 | 0.003773 | GSK3A       | 0.177008262690355 | 1 |
| COPD-HF | ENSG00000138829 | 5  | 1094 | 32 | 5E+05 | 0.003768 | FBN2        | 0.177008262690355 | 1 |
| COPD-HF | ENSG00000169194 | 5  | 8    | 2  | 5E+05 | 0.003718 | IL13        | 0.175713754102564 | 1 |
| COPD-HF | ENSG00000055955 | 3  | 41   | 5  | 5E+05 | 0.003667 | ITIH4       | 0.17377722596401  | 1 |
| COPD-HF | ENSG00000172548 | 5  | 45   | 7  | 5E+05 | 0.003639 | NIPAL4      | 0.17289013814433  | 1 |
| COPD-HF | ENSG00000124177 | 20 | 438  | 25 | 5E+05 | 0.003613 | CHD6        | 0.172093726873385 | 1 |
| COPD-HF | ENSG00000127578 | 16 | 15   | 3  | 5E+05 | 0.003588 | WFIKKN1     | 0.171345718393782 | 1 |
| COPD-HF | ENSG00000204957 | 19 | 7    | 2  | 5E+05 | 0.003588 | AC006486.1  | 0.171345718393782 | 1 |
| COPD-HF | ENSG00000113212 | 5  | 14   | 4  | 5E+05 | 0.003583 | PCDHB7      | 0.171345718393782 | 1 |
| COPD-HF | ENSG00000243696 | 3  | 55   | 6  | 5E+05 | 0.003571 | RP5-966M1.6 | 0.171345718393782 | 1 |
| COPD-HF | ENSG00000166147 | 15 | 353  | 13 | 5E+05 | 0.003537 | FBN1        | 0.170664487958115 | 1 |
| COPD-HF | ENSG00000178035 | 3  | 4    | 2  | 5E+05 | 0.003523 | IMPDH2      | 0.170430260104987 | 1 |
| COPD-HF | ENSG00000101152 | 20 | 132  | 14 | 5E+05 | 0.003436 | DNAJC5      | 0.166653723157895 | 1 |
| COPD-HF | ENSG00000130203 | 19 | 5    | 2  | 5E+05 | 0.003413 | APOE        | 0.165999135356201 | 1 |
| COPD-HF | ENSG00000140564 | 15 | 27   | 6  | 5E+05 | 0.003299 | FURIN       | 0.160888880687831 | 1 |
| COPD-HF | ENSG00000116678 | 1  | 512  | 20 | 5E+05 | 0.003298 | LEPR        | 0.160888880687831 | 1 |
| COPD-HF | ENSG00000178301 | 11 | 40   | 4  | 5E+05 | 0.003234 | AQP11       | 0.158558116755319 | 1 |
| COPD-HF | ENSG00000041357 | 15 | 22   | 3  | 5E+05 | 0.003213 | PSMA4       | 0.157914282133333 | 1 |
| COPD-HF | ENSG00000268643 | 19 | 25   | 3  | 5E+05 | 0.003182 | AC006486.9  | 0.15682835828877  | 1 |
| COPD-HF | ENSG00000204160 | 1  | 42   | 6  | 5E+05 | 0.00318  | ZDHHC18     | 0.15682835828877  | 1 |
| COPD-HF | ENSG00000168268 | 3  | 21   | 3  | 5E+05 | 0.003178 | NT5DC2      | 0.15682835828877  | 1 |
| COPD-HF | ENSG00000268163 | 19 | 127  | 13 | 5E+05 | 0.003171 | AC004076.9  | 0.15682835828877  | 1 |
| COPD-HF | ENSG00000115935 | 2  | 171  | 24 | 5E+05 | 0.003168 | WIPF1       | 0.15682835828877  | 1 |
| COPD-HF | ENSG00000165379 | 14 | 691  | 31 | 5E+05 | 0.003153 | LRFN5       | 0.15682835828877  | 1 |
| COPD-HF | ENSG00000108798 | 17 | 27   | 8  | 5E+05 | 0.003138 | ABI3        | 0.15682835828877  | 1 |

|         |                 |    |     |    |       |          |            |                   |   |
|---------|-----------------|----|-----|----|-------|----------|------------|-------------------|---|
| COPD-HF | ENSG00000255622 | 5  | 4   | 2  | 5E+05 | 0.003125 | PCDHB17    | 0.15682835828877  | 1 |
| COPD-HF | ENSG00000258429 | 16 | 5   | 2  | 5E+05 | 0.003122 | PDF        | 0.15682835828877  | 1 |
| COPD-HF | ENSG00000100883 | 14 | 175 | 16 | 5E+05 | 0.003106 | SRP54      | 0.15682835828877  | 1 |
| COPD-HF | ENSG00000241644 | 7  | 147 | 25 | 5E+05 | 0.003    | INMT       | 0.151925393681319 | 1 |
| COPD-HF | ENSG00000147434 | 8  | 88  | 9  | 5E+05 | 0.002991 | CHRNA6     | 0.151897060330579 | 1 |
| COPD-HF | ENSG00000124571 | 6  | 56  | 7  | 5E+05 | 0.002977 | XPO5       | 0.151563051104972 | 1 |
| COPD-HF | ENSG00000106546 | 7  | 41  | 10 | 5E+05 | 0.002974 | AHR        | 0.151563051104972 | 1 |
| COPD-HF | ENSG00000163431 | 1  | 111 | 18 | 5E+05 | 0.002958 | LMOD1      | 0.151468057222222 | 1 |
| COPD-HF | ENSG00000113520 | 5  | 15  | 2  | 5E+05 | 0.002954 | IL4        | 0.151468057222222 | 1 |
| COPD-HF | ENSG00000105662 | 19 | 206 | 24 | 5E+05 | 0.002944 | CRTC1      | 0.151468057222222 | 1 |
| COPD-HF | ENSG00000144035 | 2  | 2   | 1  | 5E+05 | 0.002936 | NAT8       | 0.151468057222222 | 1 |
| COPD-HF | ENSG00000269755 | 19 | 183 | 11 | 5E+05 | 0.002934 | CTD-3105H1 | 0.151468057222222 | 1 |
| COPD-HF | ENSG00000103591 | 15 | 100 | 8  | 5E+05 | 0.002885 | AAGAB      | 0.149805769859155 | 1 |
| COPD-HF | ENSG00000163491 | 3  | 720 | 22 | 5E+05 | 0.002884 | NEK10      | 0.149805769859155 | 1 |
| COPD-HF | ENSG00000142751 | 1  | 20  | 4  | 5E+05 | 0.002805 | GPN2       | 0.146471855524079 | 1 |
| COPD-HF | ENSG00000033327 | 11 | 318 | 5  | 5E+05 | 0.002804 | GAB2       | 0.146471855524079 | 1 |
| COPD-HF | ENSG00000182704 | 11 | 45  | 7  | 5E+05 | 0.002763 | TSKU       | 0.145106046438746 | 1 |
| COPD-HF | ENSG00000137207 | 6  | 10  | 3  | 5E+05 | 0.002708 | YIPF3      | 0.142624020857143 | 1 |
| COPD-HF | ENSG00000186907 | 11 | 14  | 6  | 5E+05 | 0.002666 | RTN4RL2    | 0.140782697707736 | 1 |
| COPD-HF | ENSG00000102879 | 16 | 6   | 3  | 5E+05 | 0.00265  | CORO1A     | 0.140355641954023 | 1 |
| COPD-HF | ENSG00000198670 | 6  | 214 | 17 | 5E+05 | 0.002649 | LPA        | 0.140355641954023 | 1 |
| COPD-HF | ENSG00000135655 | 12 | 338 | 18 | 5E+05 | 0.002646 | USP15      | 0.140355641954023 | 1 |
| COPD-HF | ENSG00000178033 | 6  | 37  | 6  | 5E+05 | 0.002644 | FAM26E     | 0.140355641954023 | 1 |
| COPD-HF | ENSG00000115604 | 2  | 317 | 15 | 5E+05 | 0.002621 | IL18R1     | 0.140355641954023 | 1 |
| COPD-HF | ENSG00000233538 | 2  | 1   | 1  | 5E+05 | 0.002601 | AC017104.2 | 0.139752234693878 | 1 |
| COPD-HF | ENSG00000106261 | 7  | 39  | 8  | 5E+05 | 0.002598 | ZKSCAN1    | 0.139752234693878 | 1 |
| COPD-HF | ENSG00000184838 | 5  | 664 | 40 | 5E+05 | 0.002596 | PRR16      | 0.139752234693878 | 1 |
| COPD-HF | ENSG00000167536 | 17 | 7   | 3  | 5E+05 | 0.002575 | DHRS13     | 0.139624553529412 | 1 |
| COPD-HF | ENSG00000173349 | 2  | 9   | 4  | 5E+05 | 0.002563 | SFT2D3     | 0.139356742477876 | 1 |
| COPD-HF | ENSG00000185650 | 14 | 17  | 4  | 5E+05 | 0.002551 | ZFP36L1    | 0.139141882248521 | 1 |
| COPD-HF | ENSG00000149930 | 16 | 23  | 3  | 5E+05 | 0.002545 | TAOK2      | 0.139141882248521 | 1 |
| COPD-HF | ENSG00000254470 | 11 | 8   | 3  | 5E+05 | 0.002518 | AP5B1      | 0.138154237797619 | 1 |
| COPD-HF | ENSG00000058335 | 15 | 353 | 55 | 5E+05 | 0.002517 | RASGRF1    | 0.138154237797619 | 1 |

|         |                 |    |     |    |       |          |              |                   |   |
|---------|-----------------|----|-----|----|-------|----------|--------------|-------------------|---|
| COPD-HF | ENSG0000079459  | 8  | 234 | 25 | 5E+05 | 0.002508 | FDFT1        | 0.138154237797619 | 1 |
| COPD-HF | ENSG0000220205  | 17 | 8   | 2  | 5E+05 | 0.002507 | VAMP2        | 0.138154237797619 | 1 |
| COPD-HF | ENSG0000181019  | 16 | 46  | 10 | 5E+05 | 0.002488 | NQO1         | 0.138153114156627 | 1 |
| COPD-HF | ENSG00000172432 | 6  | 21  | 4  | 5E+05 | 0.002474 | GTPBP2       | 0.137779713897281 | 1 |
| COPD-HF | ENSG00000135519 | 12 | 37  | 6  | 5E+05 | 0.00247  | KCNH3        | 0.137779713897281 | 1 |
| COPD-HF | ENSG00000213347 | 5  | 24  | 8  | 5E+05 | 0.002459 | MXD3         | 0.137779713897281 | 1 |
| COPD-HF | ENSG00000102908 | 16 | 259 | 16 | 5E+05 | 0.002433 | NFAT5        | 0.136735769207317 | 1 |
| COPD-HF | ENSG00000108963 | 17 | 35  | 11 | 5E+05 | 0.002392 | DPH1         | 0.134842750152905 | 1 |
| COPD-HF | ENSG00000116489 | 1  | 64  | 9  | 5E+05 | 0.002373 | CAPZA1       | 0.134193370858896 | 1 |
| COPD-HF | ENSG00000105364 | 19 | 16  | 5  | 5E+05 | 0.002371 | MRPL4        | 0.134193370858896 | 1 |
| COPD-HF | ENSG00000180834 | 3  | 29  | 4  | 5E+05 | 0.002354 | MAP6D1       | 0.13390095308642  | 1 |
| COPD-HF | ENSG00000158636 | 11 | 189 | 21 | 5E+05 | 0.002353 | C11orf30     | 0.13390095308642  | 1 |
| COPD-HF | ENSG00000268870 | 19 | 219 | 8  | 5E+05 | 0.002337 | CTD-3105H1   | 0.133759465217391 | 1 |
| COPD-HF | ENSG00000143079 | 1  | 144 | 5  | 5E+05 | 0.002317 | CTTNBP2NL    | 0.133027687850467 | 1 |
| COPD-HF | ENSG00000204393 | 20 | 54  | 11 | 5E+05 | 0.002313 | RP11-410N8.4 | 0.133027687850467 | 1 |
| COPD-HF | ENSG00000244624 | 21 | 1   | 1  | 5E+05 | 0.002308 | KRTAP20-1    | 0.133027687850467 | 1 |
| COPD-HF | ENSG00000163347 | 3  | 82  | 18 | 5E+05 | 0.002306 | CLDN1        | 0.133027687850467 | 1 |
| COPD-HF | ENSG0000007341  | 1  | 188 | 15 | 5E+05 | 0.002287 | ST7L         | 0.132990896845426 | 1 |
| COPD-HF | ENSG00000132773 | 1  | 5   | 3  | 5E+05 | 0.002265 | TOE1         | 0.132099277848101 | 1 |
| COPD-HF | ENSG00000125611 | 2  | 12  | 3  | 5E+05 | 0.002256 | CHCHD5       | 0.131997835238095 | 1 |
| COPD-HF | ENSG00000167083 | 17 | 25  | 7  | 5E+05 | 0.002236 | GNGT2        | 0.131232393312102 | 1 |
| COPD-HF | ENSG00000048649 | 11 | 305 | 12 | 5E+05 | 0.002221 | RSF1         | 0.130774184664537 | 1 |
| COPD-HF | ENSG00000116127 | 2  | 357 | 12 | 5E+05 | 0.002213 | ALMS1        | 0.13076204775641  | 1 |
| COPD-HF | ENSG00000171453 | 6  | 25  | 5  | 5E+05 | 0.002209 | POLR1C       | 0.13076204775641  | 1 |
| COPD-HF | ENSG00000005955 | 17 | 69  | 10 | 5E+05 | 0.002187 | GGNBP2       | 0.130029949677419 | 1 |
| COPD-HF | ENSG00000170734 | 6  | 40  | 8  | 5E+05 | 0.002139 | POLH         | 0.12756948381877  | 1 |
| COPD-HF | ENSG00000054282 | 1  | 381 | 27 | 5E+05 | 0.002123 | SDCCAG8      | 0.127032096753247 | 1 |
| COPD-HF | ENSG00000091542 | 17 | 61  | 7  | 5E+05 | 0.002093 | ALKBH5       | 0.125668628664495 | 1 |
| COPD-HF | ENSG00000171060 | 8  | 36  | 12 | 5E+05 | 0.002084 | C8orf74      | 0.125519091830065 | 1 |
| COPD-HF | ENSG00000128908 | 15 | 110 | 11 | 5E+05 | 0.002083 | INO80        | 0.125519091830065 | 1 |
| COPD-HF | ENSG00000055483 | 17 | 80  | 9  | 5E+05 | 0.002083 | USP36        | 0.125519091830065 | 1 |
| COPD-HF | ENSG00000153107 | 2  | 131 | 11 | 5E+05 | 0.002059 | ANAPC1       | 0.125283565016502 | 1 |
| COPD-HF | ENSG00000116406 | 1  | 110 | 13 | 5E+05 | 0.002031 | EDEM3        | 0.123964976821192 | 1 |

|         |                 |    |      |    |       |          |            |                   |   |
|---------|-----------------|----|------|----|-------|----------|------------|-------------------|---|
| COPD-HF | ENSG00000161996 | 16 | 68   | 4  | 5E+05 | 0.00203  | WDR90      | 0.123964976821192 | 1 |
| COPD-HF | ENSG00000162757 | 1  | 2    | 1  | 5E+05 | 0.00201  | C1orf74    | 0.123525677333333 | 1 |
| COPD-HF | ENSG00000184489 | 8  | 100  | 14 | 5E+05 | 0.001977 | PTP4A3     | 0.121885900668896 | 1 |
| COPD-HF | ENSG00000178951 | 19 | 37   | 7  | 5E+05 | 0.001971 | ZBTB7A     | 0.121885900668896 | 1 |
| COPD-HF | ENSG00000117399 | 1  | 5    | 3  | 5E+05 | 0.001968 | CDC20      | 0.121885900668896 | 1 |
| COPD-HF | ENSG00000152556 | 12 | 97   | 14 | 5E+05 | 0.001917 | PFKM       | 0.119391039189189 | 1 |
| COPD-HF | ENSG00000168214 | 4  | 420  | 45 | 5E+05 | 0.001905 | RBPJ       | 0.119033440677966 | 1 |
| COPD-HF | ENSG00000076604 | 17 | 7    | 2  | 5E+05 | 0.001896 | TRAF4      | 0.118842692176871 | 1 |
| COPD-HF | ENSG00000077782 | 8  | 74   | 14 | 5E+05 | 0.001894 | FGFR1      | 0.118842692176871 | 1 |
| COPD-HF | ENSG00000052344 | 16 | 4    | 2  | 5E+05 | 0.001892 | PRSS8      | 0.118842692176871 | 1 |
| COPD-HF | ENSG00000106290 | 7  | 18   | 5  | 5E+05 | 0.00189  | TAF6       | 0.118842692176871 | 1 |
| COPD-HF | ENSG00000253626 | 10 | 5    | 2  | 5E+05 | 0.001886 | EIF5AL1    | 0.118842692176871 | 1 |
| COPD-HF | ENSG00000165512 | 10 | 15   | 4  | 5E+05 | 0.001854 | ZNF22      | 0.118258219031142 | 1 |
| COPD-HF | ENSG00000272573 | 3  | 7    | 2  | 5E+05 | 0.001844 | MUSTN1     | 0.118048004166667 | 1 |
| COPD-HF | ENSG00000149084 | 11 | 552  | 23 | 5E+05 | 0.001826 | HSD17B12   | 0.117303244599303 | 1 |
| COPD-HF | ENSG00000116981 | 1  | 16   | 5  | 5E+05 | 0.001791 | NT5C1A     | 0.115406048251748 | 1 |
| COPD-HF | ENSG00000117595 | 1  | 54   | 6  | 5E+05 | 0.001787 | IRF6       | 0.115406048251748 | 1 |
| COPD-HF | ENSG00000113649 | 5  | 162  | 12 | 5E+05 | 0.00175  | TCERG1     | 0.113590117253521 | 1 |
| COPD-HF | ENSG00000135074 | 5  | 583  | 31 | 5E+05 | 0.001747 | ADAM19     | 0.113590117253521 | 1 |
| COPD-HF | ENSG00000123689 | 1  | 3    | 2  | 5E+05 | 0.001741 | G0S2       | 0.113590117253521 | 1 |
| COPD-HF | ENSG00000197415 | 3  | 709  | 33 | 5E+05 | 0.001719 | VEPH1      | 0.112749609964413 | 1 |
| COPD-HF | ENSG00000125520 | 20 | 11   | 3  | 5E+05 | 0.001697 | SLC2A4RG   | 0.111743479285714 | 1 |
| COPD-HF | ENSG00000221838 | 7  | 17   | 4  | 5E+05 | 0.001695 | AP4M1      | 0.111743479285714 | 1 |
| COPD-HF | ENSG00000167395 | 16 | 13   | 3  | 5E+05 | 0.001681 | ZNF646     | 0.111479866546763 | 1 |
| COPD-HF | ENSG00000185787 | 15 | 310  | 14 | 5E+05 | 0.001668 | MORF4L1    | 0.111010579783394 | 1 |
| COPD-HF | ENSG00000144152 | 2  | 112  | 17 | 5E+05 | 0.001619 | FBLN7      | 0.108146945289855 | 1 |
| COPD-HF | ENSG00000107960 | 10 | 84   | 8  | 5E+05 | 0.001611 | OBFC1      | 0.108010677090909 | 1 |
| COPD-HF | ENSG00000140463 | 15 | 92   | 14 | 5E+05 | 0.001609 | BBS4       | 0.108010677090909 | 1 |
| COPD-HF | ENSG00000146555 | 7  | 3276 | 92 | 5E+05 | 0.001582 | SDK1       | 0.106823623809524 | 1 |
| COPD-HF | ENSG00000268466 | 14 | 2    | 1  | 5E+05 | 0.001578 | AL132989.1 | 0.106823623809524 | 1 |
| COPD-HF | ENSG00000054598 | 6  | 3    | 1  | 5E+05 | 0.001573 | FOXC1      | 0.106823623809524 | 1 |
| COPD-HF | ENSG00000180855 | 19 | 66   | 5  | 5E+05 | 0.001496 | ZNF443     | 0.102098338888889 | 1 |
| COPD-HF | ENSG00000147905 | 9  | 267  | 16 | 5E+05 | 0.001495 | ZCCHC7     | 0.102098338888889 | 1 |

|         |                 |    |      |    |       |          |              |                    |   |
|---------|-----------------|----|------|----|-------|----------|--------------|--------------------|---|
| COPD-HF | ENSG00000178922 | 1  | 6    | 3  | 5E+05 | 0.00147  | HYI          | 0.101092624626866  | 1 |
| COPD-HF | ENSG00000228008 | 3  | 11   | 3  | 5E+05 | 0.001456 | CTD-2330K9   | 0.100484013108614  | 1 |
| COPD-HF | ENSG00000131899 | 17 | 41   | 6  | 5E+05 | 0.001438 | LLGL1        | 0.0996282860902256 | 1 |
| COPD-HF | ENSG00000164989 | 9  | 1250 | 16 | 5E+05 | 0.001403 | CCDC171      | 0.0976183856603773 | 1 |
| COPD-HF | ENSG00000178685 | 8  | 54   | 4  | 5E+05 | 0.001401 | PARP10       | 0.0976183856603773 | 1 |
| COPD-HF | ENSG00000079313 | 19 | 58   | 6  | 5E+05 | 0.0014   | REXO1        | 0.0976183856603773 | 1 |
| COPD-HF | ENSG00000270316 | 10 | 132  | 13 | 5E+05 | 0.001389 | C10orf32-AS1 | 0.0976183856603773 | 1 |
| COPD-HF | ENSG00000099365 | 16 | 25   | 5  | 5E+05 | 0.001383 | STX1B        | 0.0976183856603773 | 1 |
| COPD-HF | ENSG00000137802 | 15 | 81   | 12 | 5E+05 | 0.001369 | MAPKBP1      | 0.0970426553846154 | 1 |
| COPD-HF | ENSG00000164400 | 5  | 4    | 2  | 5E+05 | 0.001366 | CSF2         | 0.0970426553846154 | 1 |
| COPD-HF | ENSG00000166292 | 17 | 8    | 3  | 5E+05 | 0.001345 | TMEM100      | 0.0961016600775194 | 1 |
| COPD-HF | ENSG00000133812 | 11 | 1530 | 32 | 5E+05 | 0.001345 | SBF2         | 0.0961016600775194 | 1 |
| COPD-HF | ENSG00000072778 | 17 | 10   | 3  | 5E+05 | 0.00133  | ACADVL       | 0.09577959609375   | 1 |
| COPD-HF | ENSG00000108272 | 17 | 16   | 4  | 5E+05 | 0.001324 | DHRS11       | 0.0956781129411765 | 1 |
| COPD-HF | ENSG00000177455 | 16 | 6    | 3  | 5E+05 | 0.001319 | CD19         | 0.0956781129411765 | 1 |
| COPD-HF | ENSG00000120915 | 8  | 141  | 10 | 5E+05 | 0.001302 | EPHX2        | 0.0948534494071146 | 1 |
| COPD-HF | ENSG00000170296 | 17 | 3    | 2  | 5E+05 | 0.001298 | GABARAP      | 0.0948534494071146 | 1 |
| COPD-HF | ENSG00000262526 | 17 | 3    | 2  | 5E+05 | 0.001298 | CTD-2545G14  | 0.0948534494071146 | 1 |
| COPD-HF | ENSG00000121848 | 1  | 5    | 2  | 5E+05 | 0.001294 | RNF115       | 0.0948534494071146 | 1 |
| COPD-HF | ENSG00000269383 | 2  | 1    | 1  | 5E+05 | 0.001292 | AC012493.2   | 0.0948534494071146 | 1 |
| COPD-HF | ENSG00000137877 | 15 | 130  | 22 | 5E+05 | 0.00127  | SPTBN5       | 0.0943799330645161 | 1 |
| COPD-HF | ENSG00000158019 | 2  | 834  | 40 | 5E+05 | 0.001263 | BRE          | 0.0942844218623482 | 1 |
| COPD-HF | ENSG00000196911 | 6  | 79   | 9  | 5E+05 | 0.001253 | KPNA5        | 0.0939033967479675 | 1 |
| COPD-HF | ENSG00000102967 | 16 | 47   | 8  | 5E+05 | 0.00124  | DHODH        | 0.0932559326530612 | 1 |
| COPD-HF | ENSG00000255439 | 16 | 19   | 4  | 5E+05 | 0.00122  | RP11-196G11  | 0.0921272274590164 | 1 |
| COPD-HF | ENSG00000064651 | 5  | 146  | 12 | 5E+05 | 0.001194 | SLC12A2      | 0.0906023670781893 | 1 |
| COPD-HF | ENSG00000213380 | 16 | 44   | 7  | 5E+05 | 0.001178 | COG8         | 0.0897275785123967 | 1 |
| COPD-HF | ENSG00000111834 | 6  | 46   | 10 | 5E+05 | 0.001166 | RSPH4A       | 0.0891973634854772 | 1 |
| COPD-HF | ENSG00000131067 | 20 | 45   | 6  | 5E+05 | 0.001157 | GGT7         | 0.088824019        | 1 |
| COPD-HF | ENSG00000204138 | 1  | 330  | 9  | 5E+05 | 0.001156 | PHACTR4      | 0.088824019        | 1 |
| COPD-HF | ENSG00000101350 | 20 | 69   | 7  | 5E+05 | 0.001148 | KIF3B        | 0.088824019        | 1 |
| COPD-HF | ENSG00000143156 | 1  | 680  | 19 | 5E+05 | 0.001141 | NME7         | 0.0887195067510548 | 1 |
| COPD-HF | ENSG00000214435 | 10 | 99   | 11 | 5E+05 | 0.00113  | AS3MT        | 0.0882675139830509 | 1 |

|         |                 |    |      |    |       |          |            |                    |   |
|---------|-----------------|----|------|----|-------|----------|------------|--------------------|---|
| COPD-HF | ENSG00000134871 | 13 | 901  | 94 | 5E+05 | 0.001112 | COL4A2     | 0.0871841680851064 | 1 |
| COPD-HF | ENSG00000177731 | 17 | 20   | 6  | 5E+05 | 0.001111 | FLII       | 0.0871841680851064 | 1 |
| COPD-HF | ENSG00000154328 | 8  | 93   | 14 | 5E+05 | 0.001087 | NEIL2      | 0.0860101184549356 | 1 |
| COPD-HF | ENSG00000154783 | 3  | 467  | 32 | 5E+05 | 0.001077 | FGD5       | 0.0855704353448276 | 1 |
| COPD-HF | ENSG00000157315 | 16 | 18   | 7  | 5E+05 | 0.001072 | TMED6      | 0.0855578467532468 | 1 |
| COPD-HF | ENSG00000182450 | 11 | 6    | 2  | 5E+05 | 0.000998 | KCNK4      | 0.0800152486956522 | 1 |
| COPD-HF | ENSG00000124469 | 19 | 13   | 6  | 5E+05 | 0.000996 | CEACAM8    | 0.0800152486956522 | 1 |
| COPD-HF | ENSG00000124688 | 6  | 13   | 4  | 5E+05 | 0.000994 | MAD2L1BP   | 0.0800152486956522 | 1 |
| COPD-HF | ENSG00000176953 | 16 | 17   | 5  | 5E+05 | 0.000991 | NFATC2IP   | 0.0800152486956522 | 1 |
| COPD-HF | ENSG00000137962 | 1  | 176  | 25 | 5E+05 | 0.000986 | ARHGAP29   | 0.0800152486956522 | 1 |
| COPD-HF | ENSG00000173868 | 17 | 16   | 5  | 5E+05 | 0.00098  | PHOSPHO1   | 0.0800152486956522 | 1 |
| COPD-HF | ENSG00000109118 | 17 | 35   | 7  | 5E+05 | 0.000973 | PHF12      | 0.0800152486956522 | 1 |
| COPD-HF | ENSG00000082258 | 2  | 75   | 7  | 5E+05 | 0.000942 | CCNT2      | 0.0779038094618834 | 1 |
| COPD-HF | ENSG00000162374 | 1  | 172  | 27 | 5E+05 | 0.000929 | ELAVL4     | 0.0771188561711712 | 1 |
| COPD-HF | ENSG00000204882 | 8  | 39   | 7  | 5E+05 | 0.000909 | GPR20      | 0.07584720760181   | 1 |
| COPD-HF | ENSG00000198892 | 1  | 7    | 3  | 5E+05 | 0.000896 | SHISA4     | 0.0750616895909091 | 1 |
| COPD-HF | ENSG00000138600 | 15 | 191  | 15 | 5E+05 | 0.000891 | SPPL2A     | 0.0749987426940639 | 1 |
| COPD-HF | ENSG00000164116 | 4  | 176  | 26 | 5E+05 | 0.000832 | GUCY1A3    | 0.0703870023853211 | 1 |
| COPD-HF | ENSG00000149782 | 11 | 25   | 8  | 5E+05 | 0.000832 | PLCB3      | 0.0703870023853211 | 1 |
| COPD-HF | ENSG00000217075 | 2  | 47   | 8  | 5E+05 | 0.000832 | AC007401.2 | 0.0703870023853211 | 1 |
| COPD-HF | ENSG00000119669 | 14 | 4    | 2  | 5E+05 | 0.00082  | IRF2BPL    | 0.0703274677674419 | 1 |
| COPD-HF | ENSG00000189377 | 19 | 14   | 2  | 5E+05 | 0.000805 | CXCL17     | 0.0693528704672897 | 1 |
| COPD-HF | ENSG00000197256 | 19 | 111  | 12 | 5E+05 | 0.000796 | KANK2      | 0.0689074002347418 | 1 |
| COPD-HF | ENSG00000169900 | 16 | 1    | 1  | 5E+05 | 0.00079  | PYDC1      | 0.0686490133018868 | 1 |
| COPD-HF | ENSG00000129951 | 19 | 33   | 7  | 5E+05 | 0.000786 | LPPR3      | 0.0686490133018868 | 1 |
| COPD-HF | ENSG00000164330 | 5  | 678  | 51 | 5E+05 | 0.000784 | EBF1       | 0.0686490133018868 | 1 |
| COPD-HF | ENSG00000158186 | 3  | 122  | 10 | 5E+05 | 0.000738 | MRAS       | 0.0650570244976077 | 1 |
| COPD-HF | ENSG00000106536 | 7  | 1331 | 53 | 5E+05 | 0.000731 | POU6F2     | 0.0647981984134616 | 1 |
| COPD-HF | ENSG00000111605 | 12 | 54   | 9  | 5E+05 | 0.000715 | CPSF6      | 0.0636383741545894 | 1 |
| COPD-HF | ENSG00000144730 | 3  | 190  | 20 | 5E+05 | 0.00071  | IL17RD     | 0.063505264223301  | 1 |
| COPD-HF | ENSG00000167394 | 16 | 14   | 2  | 5E+05 | 0.000705 | ZNF668     | 0.0633816457073171 | 1 |
| COPD-HF | ENSG00000189308 | 4  | 191  | 9  | 5E+05 | 0.000704 | LIN54      | 0.0633816457073171 | 1 |
| COPD-HF | ENSG00000103496 | 16 | 17   | 3  | 5E+05 | 0.000696 | STX4       | 0.0631543636945813 | 1 |

|         |                 |    |     |    |       |          |               |                    |   |
|---------|-----------------|----|-----|----|-------|----------|---------------|--------------------|---|
| COPD-HF | ENSG0000079387  | 12 | 155 | 15 | 5E+05 | 0.00069  | SENP1         | 0.0629240568316832 | 1 |
| COPD-HF | ENSG00000132603 | 16 | 14  | 5  | 5E+05 | 0.000685 | NIP7          | 0.0628391057711443 | 1 |
| COPD-HF | ENSG00000181163 | 5  | 56  | 6  | 5E+05 | 0.000666 | NPM1          | 0.061423364        | 1 |
| COPD-HF | ENSG00000197114 | 20 | 70  | 7  | 5E+05 | 0.000662 | ZGPAT         | 0.0613077874874372 | 1 |
| COPD-HF | ENSG00000033867 | 3  | 353 | 21 | 5E+05 | 0.000655 | SLC4A7        | 0.0610150919191919 | 1 |
| COPD-HF | ENSG00000130940 | 1  | 377 | 67 | 5E+05 | 0.000651 | CASZ1         | 0.0608672630964467 | 1 |
| COPD-HF | ENSG00000259900 | 16 | 35  | 8  | 5E+05 | 0.000642 | RP11-343C2.7  | 0.0604160384183674 | 1 |
| COPD-HF | ENSG00000178719 | 8  | 3   | 1  | 5E+05 | 0.000632 | GRINA         | 0.059729536974359  | 1 |
| COPD-HF | ENSG00000115525 | 2  | 143 | 13 | 5E+05 | 0.000627 | ST3GAL5       | 0.0595651943298969 | 1 |
| COPD-HF | ENSG00000273154 | 20 | 75  | 7  | 5E+05 | 0.000626 | RP4-583P15.10 | 0.0595651943298969 | 1 |
| COPD-HF | ENSG00000159788 | 4  | 285 | 30 | 5E+05 | 0.000612 | RGS12         | 0.0587542274479167 | 1 |
| COPD-HF | ENSG00000153086 | 2  | 102 | 6  | 5E+05 | 0.000611 | ACMSD         | 0.0587542274479167 | 1 |
| COPD-HF | ENSG00000130584 | 20 | 360 | 19 | 5E+05 | 0.00061  | ZBTB46        | 0.0587542274479167 | 1 |
| COPD-HF | ENSG00000129968 | 19 | 16  | 3  | 5E+05 | 0.000609 | ABHD17A       | 0.0587542274479167 | 1 |
| COPD-HF | ENSG00000243509 | 20 | 10  | 2  | 5E+05 | 0.000601 | TNFRSF6B      | 0.0587542274479167 | 1 |
| COPD-HF | ENSG00000197272 | 16 | 22  | 5  | 5E+05 | 0.000574 | IL27          | 0.0565824099465241 | 1 |
| COPD-HF | ENSG00000138663 | 4  | 47  | 9  | 5E+05 | 0.00057  | COPS4         | 0.0564624592473118 | 1 |
| COPD-HF | ENSG00000176974 | 17 | 81  | 9  | 5E+05 | 0.000561 | SHMT1         | 0.0559366821621622 | 1 |
| COPD-HF | ENSG00000109758 | 4  | 34  | 11 | 5E+05 | 0.000554 | HGFAC         | 0.0554723102717391 | 1 |
| COPD-HF | ENSG00000260371 | 16 | 38  | 10 | 5E+05 | 0.000549 | RP11-343C2.5  | 0.0553413052459016 | 1 |
| COPD-HF | ENSG00000163660 | 3  | 24  | 4  | 5E+05 | 0.000536 | CCNL1         | 0.0542932874175824 | 1 |
| COPD-HF | ENSG00000164077 | 3  | 21  | 5  | 5E+05 | 0.000535 | MON1A         | 0.0542932874175824 | 1 |
| COPD-HF | ENSG00000128585 | 7  | 880 | 83 | 5E+05 | 0.000528 | MKLN1         | 0.0541182639444444 | 1 |
| COPD-HF | ENSG00000177374 | 17 | 9   | 4  | 5E+05 | 0.000499 | HIC1          | 0.0514074744692738 | 1 |
| COPD-HF | ENSG00000188981 | 4  | 90  | 7  | 5E+05 | 0.000489 | MSANTD1       | 0.0506037628089888 | 1 |
| COPD-HF | ENSG00000141076 | 16 | 160 | 20 | 5E+05 | 0.000481 | CIRH1A        | 0.0501263044632768 | 1 |
| COPD-HF | ENSG00000148842 | 10 | 368 | 18 | 5E+05 | 0.000461 | CNNM2         | 0.0483279745454546 | 1 |
| COPD-HF | ENSG00000187492 | 3  | 14  | 5  | 5E+05 | 0.000453 | CDHR4         | 0.047748843        | 1 |
| COPD-HF | ENSG00000102882 | 16 | 11  | 4  | 5E+05 | 0.000444 | MAPK3         | 0.0469946156896552 | 1 |
| COPD-HF | ENSG00000136709 | 2  | 228 | 25 | 5E+05 | 0.000427 | WDR33         | 0.0454900868208093 | 1 |
| COPD-HF | ENSG00000157388 | 3  | 689 | 67 | 5E+05 | 0.000417 | CACNA1D       | 0.044695738255814  | 1 |
| COPD-HF | ENSG00000115526 | 2  | 41  | 6  | 5E+05 | 0.000414 | CHST10        | 0.0446003143274854 | 1 |
| COPD-HF | ENSG00000136378 | 15 | 76  | 13 | 5E+05 | 0.000412 | ADAMTS7       | 0.0446003143274854 | 1 |

|         |                 |    |      |     |       |          |               |                    |   |
|---------|-----------------|----|------|-----|-------|----------|---------------|--------------------|---|
| COPD-HF | ENSG00000138785 | 4  | 427  | 13  | 5E+05 | 0.000403 | INTS12        | 0.0440090601775148 | 1 |
| COPD-HF | ENSG00000101336 | 20 | 74   | 9   | 5E+05 | 0.000403 | HCK           | 0.0440090601775148 | 1 |
| COPD-HF | ENSG00000258366 | 20 | 159  | 18  | 5E+05 | 0.000398 | RTEL1         | 0.0439268323952096 | 1 |
| COPD-HF | ENSG00000164078 | 3  | 20   | 4   | 5E+05 | 0.000394 | MST1R         | 0.0437173018072289 | 1 |
| COPD-HF | ENSG00000061455 | 5  | 344  | 25  | 5E+05 | 0.000391 | PRDM6         | 0.0437074358787879 | 1 |
| COPD-HF | ENSG00000168152 | 4  | 33   | 4   | 5E+05 | 0.000381 | THAP9         | 0.0428308738414634 | 1 |
| COPD-HF | ENSG00000138780 | 4  | 300  | 11  | 5E+05 | 0.000381 | GSTCD         | 0.0428308738414634 | 1 |
| COPD-HF | ENSG00000178201 | 19 | 2    | 1   | 5E+05 | 0.00038  | VN1R1         | 0.0428308738414634 | 1 |
| COPD-HF | ENSG00000273047 | 20 | 5    | 2   | 5E+05 | 0.000372 | RP4-583P15.10 | 0.0425859545341615 | 1 |
| COPD-HF | ENSG00000167397 | 16 | 7    | 3   | 5E+05 | 0.000355 | VKORC1        | 0.040916652        | 1 |
| COPD-HF | ENSG00000153975 | 6  | 68   | 9   | 5E+05 | 0.000354 | ZUFSP         | 0.040916652        | 1 |
| COPD-HF | ENSG00000103507 | 16 | 6    | 2   | 5E+05 | 0.000327 | BCKDK         | 0.0381493101265823 | 1 |
| COPD-HF | ENSG00000066056 | 1  | 26   | 3   | 5E+05 | 0.000324 | TIE1          | 0.0380189430573248 | 1 |
| COPD-HF | ENSG00000111832 | 6  | 57   | 9   | 5E+05 | 0.00032  | RWDD1         | 0.0377663811538462 | 1 |
| COPD-HF | ENSG00000026036 | 20 | 164  | 19  | 5E+05 | 0.000318 | RTEL1-TNFR    | 0.0377663811538462 | 1 |
| COPD-HF | ENSG00000197479 | 5  | 6    | 2   | 5E+05 | 0.000309 | PCDHB11       | 0.0369402107792208 | 1 |
| COPD-HF | ENSG00000165995 | 10 | 1367 | 101 | 5E+05 | 0.000308 | CACNB2        | 0.0369402107792208 | 1 |
| COPD-HF | ENSG00000168769 | 4  | 233  | 28  | 5E+05 | 0.0003   | TET2          | 0.0364294289473684 | 1 |
| COPD-HF | ENSG00000079385 | 19 | 41   | 6   | 5E+05 | 0.0003   | CEACAM1       | 0.0364294289473684 | 1 |
| COPD-HF | ENSG00000177302 | 17 | 77   | 8   | 5E+05 | 0.000299 | TOP3A         | 0.0364294289473684 | 1 |
| COPD-HF | ENSG00000196502 | 16 | 47   | 5   | 5E+05 | 0.000296 | SULT1A1       | 0.0364294289473684 | 1 |
| COPD-HF | ENSG00000153815 | 16 | 1031 | 94  | 5E+05 | 0.000292 | CMIP          | 0.0363055371621622 | 1 |
| COPD-HF | ENSG00000181873 | 1  | 16   | 4   | 5E+05 | 0.000291 | IBA57         | 0.0363055371621622 | 1 |
| COPD-HF | ENSG00000076685 | 10 | 218  | 16  | 5E+05 | 0.000282 | NT5C2         | 0.0355504393150685 | 1 |
| COPD-HF | ENSG00000143761 | 1  | 25   | 6   | 5E+05 | 0.000279 | ARF1          | 0.0354828893793103 | 1 |
| COPD-HF | ENSG00000203896 | 20 | 8    | 2   | 5E+05 | 0.000272 | LIME1         | 0.0348191689583333 | 1 |
| COPD-HF | ENSG00000170606 | 5  | 92   | 6   | 5E+05 | 0.000272 | HSPA4         | 0.0348191689583333 | 1 |
| COPD-HF | ENSG00000175029 | 10 | 639  | 60  | 5E+05 | 0.000271 | CTBP2         | 0.0348191689583333 | 1 |
| COPD-HF | ENSG00000176994 | 17 | 33   | 5   | 5E+05 | 0.000271 | SMCR8         | 0.0348191689583333 | 1 |
| COPD-HF | ENSG00000272617 | 16 | 12   | 3   | 5E+05 | 0.000262 | RP11-343C2.10 | 0.0344894596428571 | 1 |
| COPD-HF | ENSG00000120324 | 5  | 4    | 2   | 5E+05 | 0.000259 | PCDHB10       | 0.0343888169784173 | 1 |
| COPD-HF | ENSG00000180592 | 10 | 7    | 2   | 5E+05 | 0.000257 | SKIDA1        | 0.0343414804347826 | 1 |
| COPD-HF | ENSG00000169783 | 15 | 576  | 34  | 5E+05 | 0.000253 | LINGO1        | 0.0340714495620438 | 1 |

|         |                 |    |     |    |       |          |          |                    |   |
|---------|-----------------|----|-----|----|-------|----------|----------|--------------------|---|
| COPD-HF | ENSG00000198700 | 1  | 82  | 13 | 5E+05 | 0.000253 | IPO9     | 0.0340714495620438 | 1 |
| COPD-HF | ENSG00000111249 | 12 | 334 | 27 | 5E+05 | 0.000248 | CUX2     | 0.0338402571851852 | 1 |
| COPD-HF | ENSG00000154319 | 8  | 253 | 20 | 5E+05 | 0.000246 | FAM167A  | 0.0338402571851852 | 1 |
| COPD-HF | ENSG00000186998 | 22 | 171 | 27 | 5E+05 | 0.000234 | EMID1    | 0.0323783267669173 | 1 |
| COPD-HF | ENSG00000255524 | 16 | 3   | 2  | 5E+05 | 0.000233 | NPIP8    | 0.0323783267669173 | 1 |
| COPD-HF | ENSG00000178149 | 3  | 4   | 2  | 5E+05 | 0.000214 | DALRD3   | 0.0301428798473282 | 1 |
| COPD-HF | ENSG00000101246 | 20 | 14  | 2  | 5E+05 | 0.000214 | ARFRP1   | 0.0301428798473282 | 1 |
| COPD-HF | ENSG00000166165 | 14 | 5   | 2  | 5E+05 | 0.000211 | CKB      | 0.0301428798473282 | 1 |
| COPD-HF | ENSG00000117971 | 15 | 153 | 20 | 5E+05 | 0.000206 | CHRN4    | 0.02972609265625   | 1 |
| COPD-HF | ENSG00000198198 | 1  | 83  | 7  | 5E+05 | 0.000198 | SZT2     | 0.0287801540944882 | 1 |
| COPD-HF | ENSG00000156931 | 3  | 413 | 22 | 5E+05 | 0.000197 | VPS8     | 0.0287801540944882 | 1 |
| COPD-HF | ENSG00000177710 | 8  | 8   | 2  | 5E+05 | 0.000189 | SLC35G5  | 0.027853           | 1 |
| COPD-HF | ENSG00000205089 | 5  | 6   | 2  | 5E+05 | 0.000185 | CCNI2    | 0.0275365235483871 | 1 |
| COPD-HF | ENSG00000145020 | 3  | 8   | 2  | 5E+05 | 0.00017  | AMT      | 0.0254824985365854 | 1 |
| COPD-HF | ENSG00000187555 | 16 | 178 | 17 | 5E+05 | 0.000166 | USP7     | 0.0250839890163934 | 1 |
| COPD-HF | ENSG00000103510 | 16 | 22  | 4  | 5E+05 | 0.000147 | KAT8     | 0.0223785760330578 | 1 |
| COPD-HF | ENSG00000117400 | 1  | 13  | 3  | 5E+05 | 0.000146 | MPL      | 0.022354621        | 1 |
| COPD-HF | ENSG00000178952 | 16 | 7   | 2  | 5E+05 | 0.000143 | TUFM     | 0.0221196          | 1 |
| COPD-HF | ENSG00000183763 | 3  | 35  | 5  | 5E+05 | 0.000143 | TRAIP    | 0.0221196          | 1 |
| COPD-HF | ENSG00000143816 | 1  | 79  | 9  | 5E+05 | 0.000137 | WNT9A    | 0.0216091476923077 | 1 |
| COPD-HF | ENSG00000196296 | 16 | 24  | 4  | 5E+05 | 0.000137 | ATP2A1   | 0.0216091476923077 | 1 |
| COPD-HF | ENSG00000178188 | 16 | 41  | 3  | 5E+05 | 0.000125 | SH2B1    | 0.0201128073043478 | 1 |
| COPD-HF | ENSG00000132535 | 17 | 36  | 7  | 5E+05 | 0.000123 | DLG4     | 0.0198235596491228 | 1 |
| COPD-HF | ENSG00000213658 | 16 | 6   | 3  | 5E+05 | 0.000118 | LAT      | 0.0191915261061947 | 1 |
| COPD-HF | ENSG00000168488 | 16 | 26  | 2  | 5E+05 | 0.000115 | ATXN2L   | 0.0189777609821429 | 1 |
| COPD-HF | ENSG00000108342 | 17 | 11  | 3  | 5E+05 | 0.000114 | CSF3     | 0.0189777609821429 | 1 |
| COPD-HF | ENSG00000104643 | 8  | 102 | 8  | 5E+05 | 0.000113 | MTMR9    | 0.0189022036363636 | 1 |
| COPD-HF | ENSG00000184730 | 16 | 11  | 3  | 5E+05 | 0.000112 | APOBR    | 0.0188946705504587 | 1 |
| COPD-HF | ENSG00000170500 | 2  | 160 | 9  | 5E+05 | 0.000109 | LONRF2   | 0.0185524731481481 | 1 |
| COPD-HF | ENSG00000236699 | 4  | 374 | 31 | 5E+05 | 0.000108 | ARHGEF38 | 0.0185524731481481 | 1 |
| COPD-HF | ENSG00000168807 | 16 | 220 | 21 | 5E+05 | 0.000106 | SNTB2    | 0.0184747350943396 | 1 |
| COPD-HF | ENSG00000125347 | 5  | 36  | 2  | 5E+05 | 0.000105 | IRF1     | 0.0184681104761905 | 1 |
| COPD-HF | ENSG00000177548 | 16 | 30  | 7  | 5E+05 | 0.000101 | RABEP2   | 0.0179650853846154 | 1 |

|         |                 |    |      |    |       |            |            |                     |             |
|---------|-----------------|----|------|----|-------|------------|------------|---------------------|-------------|
| COPD-HF | ENSG00000176476 | 16 | 77   | 9  | 5E+05 | 9.6188e-05 | CCDC101    | 0.0172139165436893  | 1           |
| COPD-HF | ENSG00000172037 | 3  | 10   | 6  | 5E+05 | 8.5042e-05 | LAMB2      | 0.0153684233921569  | 1           |
| COPD-HF | ENSG00000164076 | 3  | 15   | 3  | 5E+05 | 8.1148e-05 | CAMKV      | 0.0148099117227723  | 1           |
| COPD-HF | ENSG00000143774 | 1  | 12   | 4  | 5E+05 | 8.0757e-05 | GUK1       | 0.0148099117227723  | 1           |
| COPD-HF | ENSG00000173145 | 10 | 92   | 9  | 5E+05 | 8.0324e-05 | NOC3L      | 0.0148099117227723  | 1           |
| COPD-HF | ENSG00000157884 | 2  | 128  | 16 | 5E+05 | 7.9515e-05 | CIB4       | 0.0148099117227723  | 1           |
| COPD-HF | ENSG00000198835 | 1  | 12   | 4  | 5E+05 | 7.1916e-05 | GJC2       | 0.0136662642061856  | 1           |
| COPD-HF | ENSG00000170291 | 17 | 12   | 3  | 5E+05 | 7.0872e-05 | ELP5       | 0.013608162         | 1           |
| COPD-HF | ENSG00000067560 | 3  | 79   | 8  | 5E+05 | 6.992e-05  | RHOA       | 0.013566688         | 1           |
| COPD-HF | ENSG00000164038 | 4  | 72   | 16 | 5E+05 | 6.7226e-05 | SLC9B2     | 0.0131827325319149  | 1           |
| COPD-HF | ENSG00000176095 | 3  | 82   | 8  | 5E+05 | 6.693e-05  | IP6K1      | 0.0131827325319149  | 1           |
| COPD-HF | ENSG00000138640 | 4  | 1106 | 43 | 5E+05 | 6.3502e-05 | FAM13A     | 0.0127231778913044  | 1           |
| COPD-HF | ENSG00000117597 | 1  | 97   | 10 | 5E+05 | 6.3029e-05 | DIEXF      | 0.0127231778913044  | 1           |
| COPD-HF | ENSG00000164068 | 3  | 44   | 7  | 5E+05 | 6.2126e-05 | RNF123     | 0.0127231778913044  | 1           |
| COPD-HF | ENSG00000175826 | 17 | 5    | 2  | 5E+05 | 5.8871e-05 | CTDNEP1    | 0.0121929117191011  | 1           |
| COPD-HF | ENSG00000132612 | 16 | 34   | 7  | 5E+05 | 5.4975e-05 | VPS4A      | 0.0115153883522727  | 1           |
| COPD-HF | ENSG00000169682 | 16 | 12   | 4  | 5E+05 | 4.8071e-05 | SPNS1      | 0.0101849740574713  | 0.886092743 |
| COPD-HF | ENSG00000262302 | 17 | 21   | 3  | 5E+05 | 4.5951e-05 | RP1-4G17.5 | 0.00984900910465116 | 0.847014783 |
| COPD-HF | ENSG00000109332 | 4  | 145  | 7  | 5E+05 | 4.5834e-05 | UBE2D3     | 0.00984900910465116 | 0.844858122 |
| COPD-HF | ENSG00000188603 | 16 | 28   | 5  | 5E+05 | 4.4883e-05 | CLN3       | 0.00984900910465116 | 0.827328339 |
| COPD-HF | ENSG00000197165 | 16 | 18   | 4  | 5E+05 | 4.3956e-05 | SULT1A2    | 0.00976193913253012 | 0.810240948 |
| COPD-HF | ENSG00000181885 | 17 | 6    | 3  | 5E+05 | 4.3049e-05 | CLDN7      | 0.00967710020731707 | 0.793522217 |
| COPD-HF | ENSG00000164270 | 5  | 467  | 33 | 5E+05 | 3.8994e-05 | HTR4       | 0.00887378274074074 | 0.718776402 |
| COPD-HF | ENSG00000101204 | 20 | 173  | 31 | 5E+05 | 3.87e-05   | CHRNA4     | 0.00887378274074074 | 0.7133571   |
| COPD-HF | ENSG00000163798 | 2  | 23   | 8  | 5E+05 | 3.739e-05  | SLC4A1AP   | 0.00872417556962025 | 0.68920987  |
| COPD-HF | ENSG00000167085 | 17 | 24   | 8  | 5E+05 | 3.5687e-05 | PHB        | 0.00843357014102564 | 0.657818471 |
| COPD-HF | ENSG00000261832 | 16 | 23   | 4  | 5E+05 | 3.5637e-05 | CLN3       | 0.00843357014102564 | 0.656896821 |
| COPD-HF | ENSG00000145354 | 4  | 33   | 4  | 5E+05 | 3.1853e-05 | CISD2      | 0.00772560985526316 | 0.587146349 |
| COPD-HF | ENSG00000173402 | 3  | 97   | 10 | 5E+05 | 3.0442e-05 | DAG1       | 0.00748183181333333 | 0.561137386 |
| COPD-HF | ENSG00000166822 | 16 | 80   | 10 | 5E+05 | 2.5783e-05 | TMEM170A   | 0.00642240593243243 | 0.475258039 |
| COPD-HF | ENSG00000198373 | 16 | 422  | 24 | 5E+05 | 2.4949e-05 | WWP2       | 0.00629979338356165 | 0.459884917 |
| COPD-HF | ENSG00000132604 | 16 | 82   | 14 | 5E+05 | 2.4517e-05 | TERF2      | 0.00627669251388889 | 0.451921861 |
| COPD-HF | ENSG00000080644 | 15 | 34   | 4  | 5E+05 | 2.3454e-05 | CHRNA3     | 0.00608912087323944 | 0.432327582 |

|         |                 |    |     |    |       |            |               |                      |             |
|---------|-----------------|----|-----|----|-------|------------|---------------|----------------------|-------------|
| COPD-HF | ENSG00000197183 | 20 | 229 | 22 | 5E+05 | 2.0296e-05 | C20orf112     | 0.00534451668571429  | 0.374116168 |
| COPD-HF | ENSG00000172818 | 11 | 23  | 6  | 5E+05 | 2.0186e-05 | OVOL1         | 0.00534451668571429  | 0.372088538 |
| COPD-HF | ENSG00000164037 | 4  | 229 | 8  | 5E+05 | 2.0067e-05 | SLC9B1        | 0.00534451668571429  | 0.369895011 |
| COPD-HF | ENSG00000109736 | 4  | 7   | 3  | 5E+05 | 1.9112e-05 | MFS10         | 0.00525808202985075  | 0.352291496 |
| COPD-HF | ENSG00000169684 | 15 | 34  | 4  | 5E+05 | 1.8066e-05 | CHRNA5        | 0.00504561481818182  | 0.333010578 |
| COPD-HF | ENSG00000145029 | 3  | 7   | 4  | 5E+05 | 1.7996e-05 | NICN1         | 0.00504561481818182  | 0.331720268 |
| COPD-HF | ENSG00000145022 | 3  | 6   | 2  | 5E+05 | 1.7376e-05 | TCTA          | 0.00500456           | 0.320291808 |
| COPD-HF | ENSG00000164062 | 3  | 7   | 2  | 5E+05 | 1.6281e-05 | APEH          | 0.00476361385714286  | 0.300107673 |
| COPD-HF | ENSG00000101346 | 20 | 33  | 5  | 5E+05 | 1.4273e-05 | POFUT1        | 0.00424345498387097  | 0.263094209 |
| COPD-HF | ENSG00000205884 | 8  | 4   | 2  | 5E+05 | 1.1426e-05 | DEFB136       | 0.00345271242622951  | 0.210615458 |
| COPD-HF | ENSG00000205334 | 2  | 13  | 4  | 5E+05 | 1.0814e-05 | AC074091.13   | 0.00332224103333333  | 0.199334462 |
| COPD-HF | ENSG00000040633 | 17 | 4   | 2  | 5E+05 | 1.0587e-05 | PHF23         | 0.00330763001694915  | 0.195150171 |
| COPD-HF | ENSG00000260914 | 16 | 33  | 5  | 5E+05 | 8.8901e-06 | RP11-343C2.10 | 0.00282536574655172  | 0.163871213 |
| COPD-HF | ENSG00000255098 | 8  | 3   | 2  | 5E+05 | 7.9969e-06 | RP11-481A20   | 0.00258608522280702  | 0.147406858 |
| COPD-HF | ENSG00000104626 | 8  | 400 | 25 | 5E+05 | 7.6454e-06 | ERII          | 0.002516565          | 0.140927658 |
| COPD-HF | ENSG00000136770 | 10 | 331 | 16 | 5E+05 | 6.0281e-06 | DNAJC1        | 0.00202029031454545  | 0.111115967 |
| COPD-HF | ENSG00000204682 | 10 | 7   | 3  | 5E+05 | 6.0167e-06 | CASC10        | 0.00202029031454545  | 0.110905831 |
| COPD-HF | ENSG00000261717 | 16 | 184 | 11 | 5E+05 | 5.8507e-06 | RP11-77K12.10 | 0.00202029031454545  | 0.107845953 |
| COPD-HF | ENSG00000138193 | 10 | 552 | 43 | 5E+05 | 5.5829e-06 | PLCE1         | 0.00197903068653846  | 0.102909596 |
| COPD-HF | ENSG00000181856 | 17 | 6   | 2  | 5E+05 | 5.5329e-06 | SLC2A4        | 0.00197903068653846  | 0.101987946 |
| COPD-HF | ENSG00000175206 | 1  | 11  | 4  | 5E+05 | 4.89e-06   | NPPA          | 0.001802747          | 0.09013737  |
| COPD-HF | ENSG00000136574 | 8  | 241 | 34 | 5E+05 | 4.857e-06  | GATA4         | 0.001802747          | 0.089529081 |
| COPD-HF | ENSG00000126003 | 20 | 10  | 2  | 5E+05 | 4.6185e-06 | PLAGL2        | 0.00177360021875     | 0.085132811 |
| COPD-HF | ENSG00000233276 | 3  | 2   | 1  | 5E+05 | 4.5515e-06 | GPX1          | 0.00177360021875     | 0.0838978   |
| COPD-HF | ENSG00000142599 | 1  | 598 | 19 | 5E+05 | 4.4095e-06 | RERE          | 0.00176696333695652  | 0.081280314 |
| COPD-HF | ENSG00000153774 | 16 | 451 | 15 | 5E+05 | 3.3769e-06 | CFDP1         | 0.00138325328222222  | 0.062246398 |
| COPD-HF | ENSG00000164061 | 3  | 148 | 13 | 5E+05 | 3.1492e-06 | BSN           | 0.00131930008181818  | 0.058049204 |
| COPD-HF | ENSG00000075413 | 14 | 254 | 9  | 5E+05 | 2.6178e-06 | MARK3         | 0.00112218389302326  | 0.048253907 |
| COPD-HF | ENSG00000173273 | 8  | 726 | 17 | 5E+05 | 2.1404e-06 | TNKS          | 0.000939380790476191 | 0.039453993 |
| COPD-HF | ENSG00000004975 | 17 | 11  | 3  | 5E+05 | 2.093e-06  | DVL2          | 0.000939380790476191 | 0.038580269 |
| COPD-HF | ENSG00000087269 | 4  | 53  | 8  | 5E+05 | 1.9032e-06 | NOP14         | 0.000877042          | 0.035081686 |
| COPD-HF | ENSG00000215346 | 8  | 11  | 3  | 5E+05 | 1.8319e-06 | AF131215.5    | 0.000865831094871795 | 0.033767413 |
| COPD-HF | ENSG00000154342 | 1  | 87  | 10 | 5E+05 | 1.8181e-06 | WNT3A         | 0.000865831094871795 | 0.033513037 |

|         |                 |    |      |     |       |            |             |                      |                 |
|---------|-----------------|----|------|-----|-------|------------|-------------|----------------------|-----------------|
| COPD-HF | ENSG00000205882 | 8  | 14   | 4   | 5E+05 | 1.7815e-06 | DEFB134     | 0.000865831094871795 | 0.03283839      |
| COPD-HF | ENSG00000171303 | 2  | 74   | 11  | 5E+05 | 1.3834e-06 | KCNK3       | 0.000708339227777778 | 0.025500212     |
| COPD-HF | ENSG00000166166 | 14 | 18   | 3   | 5E+05 | 1.3176e-06 | TRMT61A     | 0.000693923451428571 | 0.024287321     |
| COPD-HF | ENSG00000173531 | 3  | 6    | 3   | 5E+05 | 1.3125e-06 | MST1        | 0.000693923451428571 | 0.024193313     |
| COPD-HF | ENSG00000125388 | 4  | 224  | 17  | 5E+05 | 1.2064e-06 | GRK4        | 0.000673865793939394 | 0.022237571     |
| COPD-HF | ENSG00000136573 | 8  | 241  | 23  | 5E+05 | 8.1673e-07 | BLK         | 0.0004704620028125   | 0.015054784     |
| COPD-HF | ENSG00000088808 | 14 | 226  | 11  | 5E+05 | 7.7083e-07 | PPP1R13B    | 0.000458345464193548 | 0.014208709     |
| COPD-HF | ENSG00000254093 | 8  | 404  | 19  | 5E+05 | 5.858e-07  | PINX1       | 0.000359935046666667 | 0.010798051     |
| COPD-HF | ENSG00000196782 | 4  | 985  | 104 | 5E+05 | 5.507e-07  | MAML3       | 0.000350036313793103 | 0.010151053     |
| COPD-HF | ENSG00000136379 | 15 | 224  | 25  | 5E+05 | 5.2782e-07 | ABHD17C     | 0.000347475216428571 | 0.009729306     |
| COPD-HF | ENSG00000147324 | 8  | 431  | 27  | 5E+05 | 4.6574e-07 | MFHAS1      | 0.000317962422962963 | 0.008584985     |
| COPD-HF | ENSG00000175806 | 8  | 1486 | 61  | 5E+05 | 4.2683e-07 | MSRA        | 0.000302606053461535 | 0.007867757     |
| COPD-HF | ENSG00000262039 | 17 | 253  | 36  | 5E+05 | 3.8572e-07 | RP11-81K2.1 | 0.0002843990704      | 0.007109977     |
| COPD-HF | ENSG00000256500 | 14 | 260  | 15  | 5E+05 | 2.7563e-07 | RP11-73M18  | 0.000211695324583333 | 0.005080688     |
| COPD-HF | ENSG00000087274 | 4  | 124  | 15  | 5E+05 | 1.9819e-07 | ADD1        | 0.000158836359565217 | 0.003653236     |
| COPD-HF | ENSG00000126214 | 14 | 297  | 16  | 5E+05 | 1.7059e-07 | KLC1        | 0.000142931157727273 | 0.003144485     |
| COPD-HF | ENSG00000183638 | 8  | 304  | 38  | 5E+05 | 1.4333e-07 | RP1L1       | 0.000125809613809524 | 0.002642002     |
| COPD-HF | ENSG00000171056 | 8  | 559  | 19  | 5E+05 | 1.2864e-07 | SOX7        | 0.000118561          | 0.002371221     |
| COPD-HF | ENSG00000134245 | 1  | 147  | 28  | 5E+05 | 1.0906e-07 | WNT2B       | 0.000105805          | 0.002010303     |
| COPD-HF | ENSG00000177000 | 1  | 78   | 11  | 5E+05 | 1.0144e-07 | MTHFR       | 0.000103880195555556 | 0.001869844     |
| COPD-HF | ENSG00000258724 | 8  | 553  | 19  | 5E+05 | 9.2425e-08 | SOX7        | 0.000100215883823525 | 0.00170367      |
| COPD-HF | ENSG00000078403 | 10 | 154  | 23  | 5E+05 | 8.8952e-08 | MLLT10      | 0.000100215883823525 | 0.001639652     |
| COPD-HF | ENSG00000072682 | 5  | 235  | 21  | 5E+05 | 3.222e-08  | P4HA2       | 3.9594084e-05        | 0.000593911     |
| COPD-HF | ENSG00000011021 | 1  | 184  | 14  | 5E+05 | 3.1641e-08 | CLCN6       | 3.9594084e-05        | 0.000583239     |
| COPD-HF | ENSG00000131435 | 5  | 41   | 7   | 5E+05 | 2.8037e-08 | PDLIM4      | 3.9594084e-05        | 0.000516806     |
| COPD-HF | ENSG00000100711 | 14 | 40   | 9   | 5E+05 | 2.6904e-08 | ZFYVE21     | 3.9594084e-05        | 0.000495921     |
| COPD-HF | ENSG00000184608 | 8  | 280  | 23  | 5E+05 | 6.2746e-09 | C8orf12     | 1.05145183454545e-05 | 0.0001156597018 |
| COPD-HF | ENSG00000197536 | 5  | 179  | 17  | 5E+05 | 3.386e-09  | C5orf56     | 6.2414138e-06        | 6.2414138e-05   |
| COPD-HF | ENSG00000198740 | 17 | 141  | 12  | 5E+05 | 3.2437e-09 | ZNF652      | 6.2414138e-06        | 5.97911221e-05  |
| COPD-HF | ENSG00000224997 | 14 | 1    | 1   | 5E+05 | 2.5183e-09 | AL049840.1  | 5.8024779875e-06     | 4.64198239e-05  |
| COPD-HF | ENSG00000197208 | 5  | 117  | 10  | 5E+05 | 2.3995e-09 | SLC22A4     | 5.8024779875e-06     | 4.42299835e-05  |
| COPD-HF | ENSG00000256053 | 14 | 94   | 11  | 5E+05 | 2.3609e-09 | APOPT1      | 5.8024779875e-06     | 4.35184697e-05  |
| COPD-HF | ENSG00000166170 | 14 | 9    | 2   | 5E+05 | 1.445e-09  | BAG5        | 5.327137e-06         | 2.6635685e-05   |

|          |                 |    |      |    |       |            |             |                   |                 |   |
|----------|-----------------|----|------|----|-------|------------|-------------|-------------------|-----------------|---|
| COPD-HF  | ENSG00000197375 | 5  | 82   | 8  | 5E+05 | 9.5719e-10 | SLC22A5     | 4.4109708175e-06  | 1.764388327e-05 |   |
| COPD-HF  | ENSG00000171044 | 8  | 969  | 32 | 5E+05 | 5.0901e-10 | XKR6        | 3.12752711e-06    | 9.38258133e-06  |   |
| COPD-HF  | ENSG00000126215 | 14 | 27   | 6  | 5E+05 | 2.5895e-10 | XRCC3       | 2.386612675e-06   | 4.77322535e-06  |   |
| COPD-HF  | ENSG00000127663 | 19 | 518  | 32 | 5E+05 | 1.6228e-10 | KDM4B       | 2.386612675e-06   | 2.99130724e-06  |   |
| COPD-CHD | ENSG00000132703 | 1  | 2    | 1  | 4E+05 | 0.049906   | APCS        | 0.713698256767208 |                 | 1 |
| COPD-CHD | ENSG00000101336 | 20 | 80   | 9  | 4E+05 | 0.049693   | HCK         | 0.711202215944272 |                 | 1 |
| COPD-CHD | ENSG00000185332 | 17 | 81   | 9  | 4E+05 | 0.049599   | TMEM105     | 0.710406745933385 |                 | 1 |
| COPD-CHD | ENSG00000253958 | 8  | 17   | 2  | 4E+05 | 0.049598   | CLDN23      | 0.710406745933385 |                 | 1 |
| COPD-CHD | ENSG00000149527 | 1  | 242  | 39 | 4E+05 | 0.049525   | PLCH2       | 0.710406745933385 |                 | 1 |
| COPD-CHD | ENSG00000130517 | 19 | 95   | 17 | 4E+05 | 0.049523   | PGPEP1      | 0.710406745933385 |                 | 1 |
| COPD-CHD | ENSG00000131408 | 19 | 102  | 10 | 4E+05 | 0.04951    | NR1H2       | 0.710406745933385 |                 | 1 |
| COPD-CHD | ENSG00000169398 | 8  | 525  | 11 | 4E+05 | 0.049469   | PTK2        | 0.710406745933385 |                 | 1 |
| COPD-CHD | ENSG00000083635 | 13 | 68   | 13 | 4E+05 | 0.049463   | NUFIP1      | 0.710406745933385 |                 | 1 |
| COPD-CHD | ENSG00000149428 | 11 | 21   | 6  | 4E+05 | 0.049455   | HYOU1       | 0.710406745933385 |                 | 1 |
| COPD-CHD | ENSG00000169607 | 2  | 47   | 6  | 4E+05 | 0.049449   | CKAP2L      | 0.710406745933385 |                 | 1 |
| COPD-CHD | ENSG00000113108 | 5  | 37   | 10 | 4E+05 | 0.049359   | APBB3       | 0.710406745933385 |                 | 1 |
| COPD-CHD | ENSG00000108963 | 17 | 37   | 12 | 4E+05 | 0.049304   | DPH1        | 0.710406745933385 |                 | 1 |
| COPD-CHD | ENSG00000164532 | 7  | 120  | 5  | 4E+05 | 0.049297   | TBX20       | 0.710406745933385 |                 | 1 |
| COPD-CHD | ENSG00000120688 | 13 | 18   | 8  | 4E+05 | 0.049277   | WBP4        | 0.710406745933385 |                 | 1 |
| COPD-CHD | ENSG00000147432 | 8  | 192  | 6  | 4E+05 | 0.04926    | CHRN3       | 0.710406745933385 |                 | 1 |
| COPD-CHD | ENSG00000140263 | 15 | 67   | 11 | 4E+05 | 0.049156   | SORD        | 0.710406745933385 |                 | 1 |
| COPD-CHD | ENSG00000108061 | 10 | 183  | 21 | 4E+05 | 0.049049   | SHOC2       | 0.710406745933385 |                 | 1 |
| COPD-CHD | ENSG0000013288  | 4  | 115  | 16 | 4E+05 | 0.049035   | MAN2B2      | 0.710406745933385 |                 | 1 |
| COPD-CHD | ENSG00000154016 | 17 | 9    | 4  | 4E+05 | 0.048982   | GRAP        | 0.710406745933385 |                 | 1 |
| COPD-CHD | ENSG00000250091 | 12 | 13   | 2  | 4E+05 | 0.048904   | DNAH10OS    | 0.710356531029065 |                 | 1 |
| COPD-CHD | ENSG00000197746 | 10 | 122  | 17 | 4E+05 | 0.048883   | PSAP        | 0.710356531029065 |                 | 1 |
| COPD-CHD | ENSG00000185090 | 1  | 5    | 2  | 4E+05 | 0.048882   | MANEAL      | 0.710356531029065 |                 | 1 |
| COPD-CHD | ENSG00000188771 | 11 | 19   | 3  | 4E+05 | 0.048821   | PLET1       | 0.710356531029065 |                 | 1 |
| COPD-CHD | ENSG00000234857 | 11 | 61   | 7  | 4E+05 | 0.04874    | HNRNPUL2-10 | 0.710205941686367 |                 | 1 |
| COPD-CHD | ENSG00000254462 | 11 | 99   | 10 | 4E+05 | 0.048715   | TMX2-CTNN   | 0.710205941686367 |                 | 1 |
| COPD-CHD | ENSG00000163795 | 2  | 1    | 1  | 4E+05 | 0.048664   | ZNF513      | 0.710205941686367 |                 | 1 |
| COPD-CHD | ENSG00000160145 | 3  | 1860 | 82 | 4E+05 | 0.04861    | KALRN       | 0.709990134281201 |                 | 1 |
| COPD-CHD | ENSG00000196588 | 22 | 356  | 14 | 4E+05 | 0.048548   | MKL1        | 0.709645113043478 |                 | 1 |

|          |                 |    |      |     |       |          |            |                   |   |
|----------|-----------------|----|------|-----|-------|----------|------------|-------------------|---|
| COPD-CHD | ENSG00000100842 | 14 | 18   | 4   | 4E+05 | 0.048379 | EFS        | 0.707734247626582 | 1 |
| COPD-CHD | ENSG00000119321 | 9  | 221  | 20  | 4E+05 | 0.048343 | FKBP15     | 0.707734247626582 | 1 |
| COPD-CHD | ENSG00000124766 | 6  | 3    | 1   | 4E+05 | 0.048283 | SOX4       | 0.707449249603803 | 1 |
| COPD-CHD | ENSG00000164109 | 4  | 29   | 5   | 4E+05 | 0.048191 | MAD2L1     | 0.706661206185567 | 1 |
| COPD-CHD | ENSG00000124593 | 6  | 29   | 7   | 4E+05 | 0.04806  | PRICKLE4   | 0.705299571428571 | 1 |
| COPD-CHD | ENSG00000198270 | 12 | 127  | 6   | 4E+05 | 0.048051 | TMEM116    | 0.705299571428571 | 1 |
| COPD-CHD | ENSG00000116985 | 1  | 118  | 17  | 4E+05 | 0.047994 | BMP8B      | 0.705299571428571 | 1 |
| COPD-CHD | ENSG00000141026 | 17 | 19   | 4   | 4E+05 | 0.047966 | MED9       | 0.705299571428571 | 1 |
| COPD-CHD | ENSG00000151611 | 4  | 84   | 15  | 4E+05 | 0.047949 | MMAA       | 0.705299571428571 | 1 |
| COPD-CHD | ENSG00000139567 | 12 | 43   | 10  | 4E+05 | 0.047946 | ACVRL1     | 0.705299571428571 | 1 |
| COPD-CHD | ENSG00000110944 | 12 | 1    | 1   | 4E+05 | 0.047879 | IL23A      | 0.705299571428571 | 1 |
| COPD-CHD | ENSG00000227011 | 17 | 3    | 2   | 4E+05 | 0.047835 | C17orf112  | 0.705299571428571 | 1 |
| COPD-CHD | ENSG00000123454 | 9  | 129  | 25  | 4E+05 | 0.04776  | DBH        | 0.705299571428571 | 1 |
| COPD-CHD | ENSG00000164080 | 3  | 99   | 19  | 4E+05 | 0.047749 | RAD54L2    | 0.705299571428571 | 1 |
| COPD-CHD | ENSG0000012223  | 3  | 166  | 20  | 4E+05 | 0.047718 | LTF        | 0.705299571428571 | 1 |
| COPD-CHD | ENSG00000144642 | 3  | 2796 | 148 | 4E+05 | 0.047678 | RBMS3      | 0.705299571428571 | 1 |
| COPD-CHD | ENSG00000186074 | 17 | 29   | 7   | 4E+05 | 0.047623 | CD300LF    | 0.705299571428571 | 1 |
| COPD-CHD | ENSG00000214113 | 6  | 509  | 30  | 4E+05 | 0.047604 | LYRM4      | 0.705299571428571 | 1 |
| COPD-CHD | ENSG00000086619 | 1  | 363  | 12  | 4E+05 | 0.047544 | ERO1LB     | 0.705299571428571 | 1 |
| COPD-CHD | ENSG00000126091 | 1  | 467  | 23  | 4E+05 | 0.04751  | ST3GAL3    | 0.705299571428571 | 1 |
| COPD-CHD | ENSG00000188163 | 9  | 7    | 4   | 4E+05 | 0.047501 | FAM166A    | 0.705299571428571 | 1 |
| COPD-CHD | ENSG00000092148 | 14 | 126  | 12  | 4E+05 | 0.047486 | HECTD1     | 0.705299571428571 | 1 |
| COPD-CHD | ENSG00000137198 | 6  | 117  | 18  | 4E+05 | 0.047484 | GMPR       | 0.705299571428571 | 1 |
| COPD-CHD | ENSG00000135164 | 7  | 138  | 10  | 4E+05 | 0.047481 | DMTF1      | 0.705299571428571 | 1 |
| COPD-CHD | ENSG00000127022 | 5  | 108  | 11  | 4E+05 | 0.047438 | CANX       | 0.705299571428571 | 1 |
| COPD-CHD | ENSG00000173548 | 15 | 18   | 4   | 4E+05 | 0.047392 | SNX33      | 0.705299571428571 | 1 |
| COPD-CHD | ENSG00000168765 | 1  | 21   | 7   | 4E+05 | 0.047328 | GSTM4      | 0.705299571428571 | 1 |
| COPD-CHD | ENSG00000154359 | 8  | 95   | 10  | 4E+05 | 0.047299 | LONRF1     | 0.705299571428571 | 1 |
| COPD-CHD | ENSG00000214686 | 3  | 1    | 1   | 4E+05 | 0.047282 | IQCF6      | 0.705299571428571 | 1 |
| COPD-CHD | ENSG00000217075 | 2  | 50   | 8   | 4E+05 | 0.047247 | AC007401.2 | 0.705299571428571 | 1 |
| COPD-CHD | ENSG00000135801 | 1  | 82   | 10  | 4E+05 | 0.047199 | TAF5L      | 0.705299571428571 | 1 |
| COPD-CHD | ENSG00000147571 | 8  | 2    | 1   | 4E+05 | 0.047159 | CRH        | 0.705299571428571 | 1 |
| COPD-CHD | ENSG00000168000 | 11 | 39   | 6   | 4E+05 | 0.047135 | BSCL2      | 0.705299571428571 | 1 |

|          |                 |    |      |    |       |          |             |                   |   |
|----------|-----------------|----|------|----|-------|----------|-------------|-------------------|---|
| COPD-CHD | ENSG0000062485  | 12 | 41   | 5  | 4E+05 | 0.047084 | CS          | 0.705299571428571 | 1 |
| COPD-CHD | ENSG00000244486 | 22 | 45   | 9  | 4E+05 | 0.047059 | SCARF2      | 0.705299571428571 | 1 |
| COPD-CHD | ENSG0000082153  | 2  | 20   | 5  | 4E+05 | 0.047044 | BZW1        | 0.705299571428571 | 1 |
| COPD-CHD | ENSG00000130429 | 7  | 49   | 7  | 4E+05 | 0.047033 | ARPC1B      | 0.705299571428571 | 1 |
| COPD-CHD | ENSG00000159176 | 1  | 94   | 12 | 4E+05 | 0.046978 | CSRP1       | 0.705299571428571 | 1 |
| COPD-CHD | ENSG00000179941 | 12 | 4    | 2  | 4E+05 | 0.046913 | BBS10       | 0.705299571428571 | 1 |
| COPD-CHD | ENSG00000173991 | 17 | 5    | 2  | 4E+05 | 0.046833 | TCAP        | 0.705299571428571 | 1 |
| COPD-CHD | ENSG00000162222 | 11 | 20   | 4  | 4E+05 | 0.046789 | TTC9C       | 0.705299571428571 | 1 |
| COPD-CHD | ENSG00000127081 | 9  | 71   | 9  | 4E+05 | 0.046788 | ZNF484      | 0.705299571428571 | 1 |
| COPD-CHD | ENSG00000188039 | 19 | 272  | 27 | 4E+05 | 0.046767 | NWD1        | 0.705299571428571 | 1 |
| COPD-CHD | ENSG00000157800 | 7  | 408  | 42 | 4E+05 | 0.046752 | SLC37A3     | 0.705299571428571 | 1 |
| COPD-CHD | ENSG00000074410 | 15 | 130  | 20 | 4E+05 | 0.046734 | CA12        | 0.705299571428571 | 1 |
| COPD-CHD | ENSG00000156265 | 21 | 297  | 15 | 4E+05 | 0.046714 | MAP3K7CL    | 0.705299571428571 | 1 |
| COPD-CHD | ENSG00000213424 | 17 | 15   | 2  | 4E+05 | 0.046712 | KRT222      | 0.705299571428571 | 1 |
| COPD-CHD | ENSG00000177710 | 8  | 11   | 3  | 4E+05 | 0.046457 | SLC35G5     | 0.705299571428571 | 1 |
| COPD-CHD | ENSG00000142046 | 19 | 69   | 9  | 4E+05 | 0.04642  | TMEM91      | 0.705299571428571 | 1 |
| COPD-CHD | ENSG00000165304 | 9  | 157  | 9  | 4E+05 | 0.046375 | MELK        | 0.705299571428571 | 1 |
| COPD-CHD | ENSG00000075213 | 7  | 1751 | 65 | 4E+05 | 0.046362 | SEMA3A      | 0.705299571428571 | 1 |
| COPD-CHD | ENSG00000173715 | 11 | 73   | 13 | 4E+05 | 0.046353 | C11orf80    | 0.705299571428571 | 1 |
| COPD-CHD | ENSG00000107854 | 10 | 168  | 14 | 4E+05 | 0.046282 | TNKS2       | 0.705299571428571 | 1 |
| COPD-CHD | ENSG00000153086 | 2  | 109  | 6  | 4E+05 | 0.046254 | ACMSD       | 0.705299571428571 | 1 |
| COPD-CHD | ENSG00000154319 | 8  | 266  | 19 | 4E+05 | 0.046253 | FAM167A     | 0.705299571428571 | 1 |
| COPD-CHD | ENSG00000134371 | 1  | 186  | 14 | 4E+05 | 0.046114 | CDC73       | 0.70528864681555  | 1 |
| COPD-CHD | ENSG00000266953 | 19 | 23   | 7  | 4E+05 | 0.046047 | RP11-618P17 | 0.704846918046358 | 1 |
| COPD-CHD | ENSG00000131149 | 16 | 147  | 28 | 4E+05 | 0.046014 | GSE1        | 0.704846918046358 | 1 |
| COPD-CHD | ENSG00000120915 | 8  | 145  | 10 | 4E+05 | 0.045999 | EPHX2       | 0.704846918046358 | 1 |
| COPD-CHD | ENSG00000072134 | 17 | 77   | 8  | 4E+05 | 0.04599  | EPN2        | 0.704846918046358 | 1 |
| COPD-CHD | ENSG00000167601 | 19 | 105  | 17 | 4E+05 | 0.04593  | AXL         | 0.704846918046358 | 1 |
| COPD-CHD | ENSG00000168209 | 10 | 3    | 1  | 4E+05 | 0.045813 | DDIT4       | 0.704179703241895 | 1 |
| COPD-CHD | ENSG00000103942 | 15 | 313  | 25 | 4E+05 | 0.045727 | HOMER2      | 0.703442559900166 | 1 |
| COPD-CHD | ENSG00000183317 | 1  | 185  | 19 | 4E+05 | 0.045674 | EPHA10      | 0.703212268109908 | 1 |
| COPD-CHD | ENSG00000186635 | 11 | 268  | 19 | 4E+05 | 0.045602 | ARAP1       | 0.702688818333333 | 1 |
| COPD-CHD | ENSG00000226887 | 4  | 40   | 3  | 4E+05 | 0.045545 | ERVMER34-10 | 0.702395825688074 | 1 |

|                          |    |     |    |       |          |             |                   |   |
|--------------------------|----|-----|----|-------|----------|-------------|-------------------|---|
| COPD-CHD ENSG00000188573 | 5  | 10  | 4  | 4E+05 | 0.045521 | FBLL1       | 0.702395825688074 | 1 |
| COPD-CHD ENSG00000188396 | 1  | 2   | 1  | 4E+05 | 0.045449 | TCTEX1D4    | 0.702086431913116 | 1 |
| COPD-CHD ENSG00000128656 | 2  | 272 | 14 | 4E+05 | 0.04541  | CHN1        | 0.702070493311037 | 1 |
| COPD-CHD ENSG00000078304 | 14 | 414 | 38 | 4E+05 | 0.045347 | PPP2R5C     | 0.701683160669456 | 1 |
| COPD-CHD ENSG00000020633 | 1  | 124 | 24 | 4E+05 | 0.045321 | RUNX3       | 0.701683160669456 | 1 |
| COPD-CHD ENSG00000077312 | 19 | 31  | 8  | 4E+05 | 0.045301 | SNRPA       | 0.701683160669456 | 1 |
| COPD-CHD ENSG00000162367 | 1  | 33  | 7  | 4E+05 | 0.045128 | TAL1        | 0.70005188590604  | 1 |
| COPD-CHD ENSG00000159899 | 9  | 29  | 4  | 4E+05 | 0.045063 | NPR2        | 0.699630506297229 | 1 |
| COPD-CHD ENSG00000129152 | 11 | 6   | 3  | 4E+05 | 0.044943 | MYOD1       | 0.698353792436975 | 1 |
| COPD-CHD ENSG00000007129 | 19 | 47  | 6  | 4E+05 | 0.044924 | CEACAM21    | 0.698353792436975 | 1 |
| COPD-CHD ENSG00000185670 | 11 | 6   | 3  | 4E+05 | 0.044865 | ZBTB3       | 0.698315416666667 | 1 |
| COPD-CHD ENSG00000118246 | 2  | 61  | 9  | 4E+05 | 0.044852 | FASTKD2     | 0.698315416666667 | 1 |
| COPD-CHD ENSG00000138622 | 15 | 132 | 21 | 4E+05 | 0.044833 | HCN4        | 0.698315416666667 | 1 |
| COPD-CHD ENSG00000196323 | 11 | 95  | 11 | 4E+05 | 0.044754 | ZBTB44      | 0.698315416666667 | 1 |
| COPD-CHD ENSG00000181689 | 11 | 2   | 1  | 4E+05 | 0.044661 | OR8K3       | 0.697488641047297 | 1 |
| COPD-CHD ENSG00000186665 | 17 | 1   | 1  | 4E+05 | 0.044633 | C17orf58    | 0.697488641047297 | 1 |
| COPD-CHD ENSG00000113369 | 5  | 18  | 9  | 4E+05 | 0.044613 | ARRDC3      | 0.697488641047297 | 1 |
| COPD-CHD ENSG00000153485 | 14 | 3   | 2  | 4E+05 | 0.04459  | TMEM251     | 0.697488641047297 | 1 |
| COPD-CHD ENSG00000168575 | 8  | 201 | 27 | 4E+05 | 0.044561 | SLC20A2     | 0.697488641047297 | 1 |
| COPD-CHD ENSG00000100991 | 20 | 240 | 14 | 4E+05 | 0.044496 | TRPC4AP     | 0.697488641047297 | 1 |
| COPD-CHD ENSG00000100804 | 14 | 26  | 6  | 4E+05 | 0.044483 | PSMB5       | 0.697488641047297 | 1 |
| COPD-CHD ENSG00000146955 | 7  | 83  | 16 | 4E+05 | 0.044346 | RAB19       | 0.696688093457944 | 1 |
| COPD-CHD ENSG00000196796 | 16 | 6   | 2  | 4E+05 | 0.044247 | CTB-134H23. | 0.695723875       | 1 |
| COPD-CHD ENSG00000229615 | 2  | 4   | 2  | 4E+05 | 0.044239 | AC111200.1  | 0.695723875       | 1 |
| COPD-CHD ENSG00000125398 | 17 | 8   | 2  | 4E+05 | 0.044102 | SOX9        | 0.694625282793867 | 1 |
| COPD-CHD ENSG00000110011 | 11 | 7   | 3  | 4E+05 | 0.04409  | DNAJC4      | 0.694625282793867 | 1 |
| COPD-CHD ENSG00000147457 | 8  | 68  | 15 | 4E+05 | 0.043973 | CHMP7       | 0.693775377986348 | 1 |
| COPD-CHD ENSG00000128335 | 22 | 80  | 15 | 4E+05 | 0.043968 | APOL2       | 0.693775377986348 | 1 |
| COPD-CHD ENSG00000170608 | 19 | 22  | 6  | 4E+05 | 0.043945 | FOXA3       | 0.693775377986348 | 1 |
| COPD-CHD ENSG00000214753 | 11 | 16  | 3  | 4E+05 | 0.043896 | HNRNPUL2    | 0.693775377986348 | 1 |
| COPD-CHD ENSG00000163531 | 1  | 536 | 47 | 4E+05 | 0.043862 | NFASC       | 0.693775377986348 | 1 |
| COPD-CHD ENSG00000181634 | 9  | 30  | 9  | 4E+05 | 0.043849 | TNFSF15     | 0.693775377986348 | 1 |
| COPD-CHD ENSG00000125788 | 20 | 7   | 3  | 4E+05 | 0.043833 | DEFB126     | 0.693775377986348 | 1 |

|          |                 |    |      |     |       |          |              |                   |   |
|----------|-----------------|----|------|-----|-------|----------|--------------|-------------------|---|
| COPD-CHD | ENSG00000107249 | 9  | 2193 | 165 | 4E+05 | 0.043734 | GLIS3        | 0.693775377986348 | 1 |
| COPD-CHD | ENSG00000196792 | 14 | 310  | 19  | 4E+05 | 0.04372  | STRN3        | 0.693775377986348 | 1 |
| COPD-CHD | ENSG00000091583 | 17 | 170  | 19  | 4E+05 | 0.043708 | APOH         | 0.693775377986348 | 1 |
| COPD-CHD | ENSG00000257594 | 12 | 13   | 3   | 4E+05 | 0.043691 | GALNT4       | 0.693775377986348 | 1 |
| COPD-CHD | ENSG00000259075 | 12 | 13   | 3   | 4E+05 | 0.043691 | POC1B-GALNT4 | 0.693775377986348 | 1 |
| COPD-CHD | ENSG00000108960 | 17 | 59   | 8   | 4E+05 | 0.043547 | MMD          | 0.693775377986348 | 1 |
| COPD-CHD | ENSG00000165895 | 11 | 1279 | 48  | 4E+05 | 0.04353  | ARHGAP42     | 0.693775377986348 | 1 |
| COPD-CHD | ENSG00000148308 | 9  | 21   | 5   | 4E+05 | 0.043476 | GTF3C5       | 0.693775377986348 | 1 |
| COPD-CHD | ENSG00000179148 | 17 | 81   | 20  | 4E+05 | 0.043399 | ALOXE3       | 0.693596291270527 | 1 |
| COPD-CHD | ENSG00000038382 | 5  | 913  | 47  | 4E+05 | 0.043371 | TRIO         | 0.693596291270527 | 1 |
| COPD-CHD | ENSG00000150787 | 11 | 96   | 3   | 4E+05 | 0.043278 | PTS          | 0.692860171428571 | 1 |
| COPD-CHD | ENSG00000269795 | 1  | 11   | 4   | 4E+05 | 0.043256 | AC092782.1   | 0.692860171428571 | 1 |
| COPD-CHD | ENSG00000139540 | 12 | 10   | 2   | 4E+05 | 0.043161 | SLC39A5      | 0.692185647007806 | 1 |
| COPD-CHD | ENSG00000175352 | 11 | 61   | 8   | 4E+05 | 0.043108 | NRIP3        | 0.691935788194444 | 1 |
| COPD-CHD | ENSG00000149305 | 11 | 115  | 16  | 4E+05 | 0.043048 | HTR3B        | 0.691573039096438 | 1 |
| COPD-CHD | ENSG00000214226 | 17 | 115  | 10  | 4E+05 | 0.042983 | C17orf67     | 0.691129263478261 | 1 |
| COPD-CHD | ENSG00000140382 | 15 | 113  | 11  | 4E+05 | 0.042959 | HMG20A       | 0.691129263478261 | 1 |
| COPD-CHD | ENSG00000169744 | 4  | 1033 | 104 | 4E+05 | 0.042954 | LDB2         | 0.691129263478261 | 1 |
| COPD-CHD | ENSG00000065526 | 1  | 140  | 16  | 4E+05 | 0.042905 | SPEN         | 0.691129263478261 | 1 |
| COPD-CHD | ENSG00000130768 | 1  | 69   | 9   | 4E+05 | 0.042824 | SMPDL3B      | 0.690976076788831 | 1 |
| COPD-CHD | ENSG00000101040 | 20 | 184  | 27  | 4E+05 | 0.042822 | ZMYND8       | 0.690976076788831 | 1 |
| COPD-CHD | ENSG00000116459 | 1  | 23   | 4   | 4E+05 | 0.042808 | ATP5F1       | 0.690976076788831 | 1 |
| COPD-CHD | ENSG00000139725 | 12 | 60   | 6   | 4E+05 | 0.042744 | RHOF         | 0.690976076788831 | 1 |
| COPD-CHD | ENSG00000160113 | 19 | 36   | 13  | 4E+05 | 0.042677 | NR2F6        | 0.690976076788831 | 1 |
| COPD-CHD | ENSG00000177599 | 19 | 23   | 5   | 4E+05 | 0.042642 | ZNF491       | 0.690976076788831 | 1 |
| COPD-CHD | ENSG00000258941 | 14 | 272  | 15  | 4E+05 | 0.042593 | RP11-407N170 | 0.69086593245614  | 1 |
| COPD-CHD | ENSG00000168792 | 17 | 6    | 4   | 4E+05 | 0.042574 | ABHD15       | 0.69086593245614  | 1 |
| COPD-CHD | ENSG00000198060 | 10 | 78   | 10  | 4E+05 | 0.042559 | 5-Mar        | 0.69086593245614  | 1 |
| COPD-CHD | ENSG00000176020 | 3  | 3    | 2   | 4E+05 | 0.042508 | AMIGO3       | 0.69086593245614  | 1 |
| COPD-CHD | ENSG00000173540 | 3  | 3    | 2   | 4E+05 | 0.042508 | GMPPB        | 0.69086593245614  | 1 |
| COPD-CHD | ENSG00000165553 | 14 | 9    | 4   | 4E+05 | 0.042491 | NGB          | 0.69086593245614  | 1 |
| COPD-CHD | ENSG00000272896 | 9  | 30   | 5   | 4E+05 | 0.04249  | RP11-216L13  | 0.69086593245614  | 1 |
| COPD-CHD | ENSG00000261147 | 15 | 59   | 6   | 4E+05 | 0.042432 | RP11-697E2.1 | 0.69086593245614  | 1 |

|                          |    |      |     |       |                    |                   |   |
|--------------------------|----|------|-----|-------|--------------------|-------------------|---|
| COPD-CHD ENSG00000136933 | 9  | 65   | 9   | 4E+05 | 0.042269 RABEPK    | 0.690455900176679 | 1 |
| COPD-CHD ENSG00000157014 | 3  | 89   | 11  | 4E+05 | 0.042257 TATDN2    | 0.690455900176679 | 1 |
| COPD-CHD ENSG00000185133 | 22 | 24   | 7   | 4E+05 | 0.04225 INPP5J     | 0.690455900176679 | 1 |
| COPD-CHD ENSG00000128989 | 15 | 64   | 7   | 4E+05 | 0.042227 ARPP19    | 0.690455900176679 | 1 |
| COPD-CHD ENSG00000147697 | 8  | 112  | 17  | 4E+05 | 0.042173 GSDMC     | 0.690455900176679 | 1 |
| COPD-CHD ENSG00000172878 | 2  | 174  | 23  | 4E+05 | 0.042129 METAP1D   | 0.690455900176679 | 1 |
| COPD-CHD ENSG00000188761 | 1  | 21   | 6   | 4E+05 | 0.042128 BCL2L15   | 0.690455900176679 | 1 |
| COPD-CHD ENSG00000167916 | 17 | 7    | 2   | 4E+05 | 0.042119 KRT24     | 0.690455900176679 | 1 |
| COPD-CHD ENSG00000213160 | 2  | 351  | 25  | 4E+05 | 0.042072 KLHL23    | 0.690455900176679 | 1 |
| COPD-CHD ENSG00000228716 | 5  | 141  | 5   | 4E+05 | 0.042054 DHFR      | 0.690455900176679 | 1 |
| COPD-CHD ENSG00000171136 | 19 | 9    | 3   | 4E+05 | 0.042036 RLN3      | 0.690455900176679 | 1 |
| COPD-CHD ENSG00000143344 | 1  | 888  | 44  | 4E+05 | 0.04201 RGL1       | 0.690455900176679 | 1 |
| COPD-CHD ENSG00000180287 | 1  | 1662 | 94  | 4E+05 | 0.042 PLD5         | 0.690455900176679 | 1 |
| COPD-CHD ENSG00000158292 | 1  | 34   | 2   | 4E+05 | 0.041946 GPR153    | 0.690455900176679 | 1 |
| COPD-CHD ENSG00000169570 | 5  | 275  | 25  | 4E+05 | 0.041873 DTWD2     | 0.690455900176679 | 1 |
| COPD-CHD ENSG00000008196 | 6  | 66   | 11  | 4E+05 | 0.041824 TFAP2B    | 0.690455900176679 | 1 |
| COPD-CHD ENSG00000181001 | 11 | 8    | 3   | 4E+05 | 0.041806 OR52N1    | 0.690455900176679 | 1 |
| COPD-CHD ENSG00000165972 | 12 | 287  | 27  | 4E+05 | 0.041763 CCDC38    | 0.690455900176679 | 1 |
| COPD-CHD ENSG00000268821 | 2  | 11   | 4   | 4E+05 | 0.04173 AC068039.1 | 0.690455900176679 | 1 |
| COPD-CHD ENSG00000166199 | 11 | 142  | 15  | 4E+05 | 0.041693 ALKBH3    | 0.690455900176679 | 1 |
| COPD-CHD ENSG00000162695 | 1  | 117  | 10  | 4E+05 | 0.041656 SLC30A7   | 0.690455900176679 | 1 |
| COPD-CHD ENSG00000171735 | 1  | 2468 | 187 | 4E+05 | 0.041609 CAMTA1    | 0.690455900176679 | 1 |
| COPD-CHD ENSG00000196843 | 2  | 20   | 6   | 4E+05 | 0.04148 ARID5A     | 0.690455900176679 | 1 |
| COPD-CHD ENSG00000166793 | 11 | 5    | 3   | 4E+05 | 0.041467 YPEL4     | 0.690455900176679 | 1 |
| COPD-CHD ENSG00000170485 | 2  | 525  | 55  | 4E+05 | 0.041438 NPAS2     | 0.690455900176679 | 1 |
| COPD-CHD ENSG00000106852 | 9  | 43   | 12  | 4E+05 | 0.041372 LHX6      | 0.690455900176679 | 1 |
| COPD-CHD ENSG00000129003 | 15 | 550  | 19  | 4E+05 | 0.041371 VPS13C    | 0.690455900176679 | 1 |
| COPD-CHD ENSG00000157833 | 2  | 36   | 6   | 4E+05 | 0.041322 GAREML    | 0.690455900176679 | 1 |
| COPD-CHD ENSG00000134375 | 1  | 38   | 8   | 4E+05 | 0.041314 TIMM17A   | 0.690455900176679 | 1 |
| COPD-CHD ENSG00000149548 | 11 | 263  | 15  | 4E+05 | 0.041246 CCDC15    | 0.690455900176679 | 1 |
| COPD-CHD ENSG00000131196 | 18 | 585  | 41  | 4E+05 | 0.041228 NFATC1    | 0.690455900176679 | 1 |
| COPD-CHD ENSG00000123119 | 8  | 318  | 11  | 4E+05 | 0.041141 NECAB1    | 0.690455900176679 | 1 |
| COPD-CHD ENSG00000116678 | 1  | 579  | 23  | 4E+05 | 0.041083 LEPR      | 0.690455900176679 | 1 |

|                          |    |      |    |       |          |               |                   |   |
|--------------------------|----|------|----|-------|----------|---------------|-------------------|---|
| COPD-CHD ENSG00000185069 | 12 | 27   | 5  | 4E+05 | 0.041064 | KRT76         | 0.690455900176679 | 1 |
| COPD-CHD ENSG00000169717 | 1  | 4    | 1  | 4E+05 | 0.040865 | ACTRT2        | 0.688191908014572 | 1 |
| COPD-CHD ENSG00000186106 | 8  | 122  | 15 | 4E+05 | 0.040812 | ANKRD46       | 0.687925881494986 | 1 |
| COPD-CHD ENSG00000050327 | 7  | 8    | 1  | 4E+05 | 0.04081  | ARHGEF5       | 0.687925881494986 | 1 |
| COPD-CHD ENSG00000159377 | 1  | 2    | 1  | 4E+05 | 0.040764 | PSMB4         | 0.687925881494986 | 1 |
| COPD-CHD ENSG00000182898 | 1  | 2    | 1  | 4E+05 | 0.040755 | TCHHL1        | 0.687925881494986 | 1 |
| COPD-CHD ENSG00000126368 | 17 | 15   | 5  | 4E+05 | 0.040737 | NR1D1         | 0.687925881494986 | 1 |
| COPD-CHD ENSG00000126882 | 9  | 25   | 5  | 4E+05 | 0.040707 | FAM78A        | 0.687925881494986 | 1 |
| COPD-CHD ENSG00000196981 | 3  | 6    | 2  | 4E+05 | 0.040682 | WDR5B         | 0.687925881494986 | 1 |
| COPD-CHD ENSG00000164163 | 4  | 14   | 4  | 4E+05 | 0.040674 | ABCE1         | 0.687925881494986 | 1 |
| COPD-CHD ENSG00000100523 | 14 | 165  | 11 | 4E+05 | 0.040656 | DDHD1         | 0.687925881494986 | 1 |
| COPD-CHD ENSG00000197183 | 20 | 242  | 23 | 4E+05 | 0.040558 | C20orf112     | 0.687925881494986 | 1 |
| COPD-CHD ENSG00000100426 | 22 | 111  | 5  | 4E+05 | 0.040504 | ZBED4         | 0.687925881494986 | 1 |
| COPD-CHD ENSG00000267318 | 17 | 46   | 8  | 4E+05 | 0.040489 | RP11-178C3.10 | 0.687925881494986 | 1 |
| COPD-CHD ENSG00000107438 | 10 | 180  | 23 | 4E+05 | 0.040485 | PDLIM1        | 0.687925881494986 | 1 |
| COPD-CHD ENSG00000013503 | 12 | 309  | 13 | 4E+05 | 0.040452 | POLR3B        | 0.687925881494986 | 1 |
| COPD-CHD ENSG00000101391 | 20 | 48   | 7  | 4E+05 | 0.040451 | CDK5RAP1      | 0.687925881494986 | 1 |
| COPD-CHD ENSG00000204941 | 19 | 16   | 6  | 4E+05 | 0.040406 | PSG5          | 0.687925881494986 | 1 |
| COPD-CHD ENSG00000268960 | 18 | 2    | 1  | 4E+05 | 0.040242 | AC091150.1    | 0.687925881494986 | 1 |
| COPD-CHD ENSG00000134201 | 1  | 155  | 24 | 4E+05 | 0.040179 | GSTM5         | 0.687916563888889 | 1 |
| COPD-CHD ENSG00000091129 | 7  | 1067 | 40 | 4E+05 | 0.040115 | NRCAM         | 0.68745733549583  | 1 |
| COPD-CHD ENSG00000173517 | 15 | 458  | 20 | 4E+05 | 0.040071 | PEAK1         | 0.687340316326531 | 1 |
| COPD-CHD ENSG00000100393 | 22 | 131  | 13 | 4E+05 | 0.03998  | EP300         | 0.686416137418756 | 1 |
| COPD-CHD ENSG00000145839 | 5  | 7    | 2  | 4E+05 | 0.039893 | IL9           | 0.685558980483271 | 1 |
| COPD-CHD ENSG00000109133 | 4  | 72   | 7  | 4E+05 | 0.03989  | TMEM33        | 0.685558980483271 | 1 |
| COPD-CHD ENSG00000196979 | 9  | 17   | 3  | 4E+05 | 0.039867 | AL360004.1    | 0.685558980483271 | 1 |
| COPD-CHD ENSG00000125779 | 20 | 85   | 10 | 4E+05 | 0.039825 | PANK2         | 0.685558980483271 | 1 |
| COPD-CHD ENSG00000139645 | 12 | 21   | 3  | 4E+05 | 0.039823 | ANKRD52       | 0.685558980483271 | 1 |
| COPD-CHD ENSG00000120265 | 6  | 140  | 4  | 4E+05 | 0.039806 | PCMT1         | 0.685558980483271 | 1 |
| COPD-CHD ENSG00000255974 | 19 | 30   | 7  | 4E+05 | 0.039796 | CYP2A6        | 0.685558980483271 | 1 |
| COPD-CHD ENSG00000135480 | 12 | 55   | 10 | 4E+05 | 0.03975  | KRT7          | 0.685558980483271 | 1 |
| COPD-CHD ENSG00000148848 | 10 | 1311 | 97 | 4E+05 | 0.03968  | ADAM12        | 0.685558980483271 | 1 |
| COPD-CHD ENSG00000167103 | 9  | 12   | 2  | 4E+05 | 0.039646 | PIP5KL1       | 0.685558980483271 | 1 |

|                         |    |     |    |       |          |         |                   |   |
|-------------------------|----|-----|----|-------|----------|---------|-------------------|---|
| COPD-CHD ENSG0000087269 | 4  | 60  | 9  | 4E+05 | 0.039597 | NOP14   | 0.685558980483271 | 1 |
| COPD-CHD ENSG0000056558 | 9  | 79  | 6  | 4E+05 | 0.039499 | TRAF1   | 0.685558980483271 | 1 |
| COPD-CHD ENSG0000198561 | 11 | 76  | 10 | 4E+05 | 0.03949  | CTNND1  | 0.685558980483271 | 1 |
| COPD-CHD ENSG0000062716 | 17 | 200 | 17 | 4E+05 | 0.039373 | VMP1    | 0.684897594543744 | 1 |
| COPD-CHD ENSG0000100146 | 22 | 10  | 3  | 4E+05 | 0.039262 | SOX10   | 0.683609832391714 | 1 |
| COPD-CHD ENSG0000106624 | 7  | 26  | 7  | 4E+05 | 0.039232 | AEBP1   | 0.683609832391714 | 1 |
| COPD-CHD ENSG0000154143 | 11 | 8   | 5  | 4E+05 | 0.039219 | PANX3   | 0.683609832391714 | 1 |
| COPD-CHD ENSG0000146676 | 7  | 10  | 4  | 4E+05 | 0.039167 | PURB    | 0.683609832391714 | 1 |
| COPD-CHD ENSG0000100883 | 14 | 191 | 16 | 4E+05 | 0.038945 | SRP54   | 0.680654059546314 | 1 |
| COPD-CHD ENSG0000121690 | 11 | 68  | 7  | 4E+05 | 0.038898 | DEPDC7  | 0.680475797540208 | 1 |
| COPD-CHD ENSG0000141720 | 17 | 66  | 12 | 4E+05 | 0.038802 | PIP4K2B | 0.679439188       | 1 |
| COPD-CHD ENSG0000196072 | 10 | 24  | 6  | 4E+05 | 0.038729 | BLOC1S2 | 0.678803733649289 | 1 |
| COPD-CHD ENSG0000176253 | 14 | 2   | 1  | 4E+05 | 0.038709 | OR4K13  | 0.678803733649289 | 1 |
| COPD-CHD ENSG0000213471 | 15 | 52  | 5  | 4E+05 | 0.038667 | TTLL13  | 0.678803733649289 | 1 |
| COPD-CHD ENSG0000065413 | 2  | 897 | 54 | 4E+05 | 0.038652 | ANKRD44 | 0.678803733649289 | 1 |
| COPD-CHD ENSG0000140395 | 15 | 49  | 10 | 4E+05 | 0.038633 | WDR61   | 0.678803733649289 | 1 |
| COPD-CHD ENSG0000174886 | 19 | 45  | 9  | 4E+05 | 0.038599 | NDUFA11 | 0.678803733649289 | 1 |
| COPD-CHD ENSG0000171720 | 5  | 22  | 7  | 4E+05 | 0.038511 | HDAC3   | 0.678803733649289 | 1 |
| COPD-CHD ENSG0000126351 | 17 | 53  | 12 | 4E+05 | 0.03835  | THRA    | 0.676650620229008 | 1 |
| COPD-CHD ENSG0000240303 | 3  | 142 | 14 | 4E+05 | 0.038317 | ACAD11  | 0.676650620229008 | 1 |
| COPD-CHD ENSG0000115211 | 2  | 11  | 6  | 4E+05 | 0.038295 | EIF2B4  | 0.676650620229008 | 1 |
| COPD-CHD ENSG0000205883 | 8  | 10  | 2  | 4E+05 | 0.038234 | DEFB135 | 0.676540568421053 | 1 |
| COPD-CHD ENSG0000164308 | 5  | 202 | 8  | 4E+05 | 0.038208 | ERAP2   | 0.676540568421053 | 1 |
| COPD-CHD ENSG0000019186 | 20 | 83  | 15 | 4E+05 | 0.038037 | CYP24A1 | 0.67434531831256  | 1 |
| COPD-CHD ENSG0000091542 | 17 | 62  | 8  | 4E+05 | 0.038021 | ALKBH5  | 0.67434531831256  | 1 |
| COPD-CHD ENSG0000127831 | 2  | 37  | 4  | 4E+05 | 0.037898 | VIL1    | 0.673171871277618 | 1 |
| COPD-CHD ENSG0000108474 | 17 | 247 | 14 | 4E+05 | 0.037895 | PIGL    | 0.673171871277618 | 1 |
| COPD-CHD ENSG0000120656 | 1  | 63  | 9  | 4E+05 | 0.037754 | TAF12   | 0.671904922040424 | 1 |
| COPD-CHD ENSG0000262246 | 16 | 160 | 17 | 4E+05 | 0.037749 | CORO7   | 0.671904922040424 | 1 |
| COPD-CHD ENSG0000189366 | 3  | 48  | 5  | 4E+05 | 0.037735 | ALG1L   | 0.671904922040424 | 1 |
| COPD-CHD ENSG0000054282 | 1  | 401 | 29 | 4E+05 | 0.037686 | SDCCAG8 | 0.671904922040424 | 1 |
| COPD-CHD ENSG0000091844 | 6  | 410 | 20 | 4E+05 | 0.037659 | RGS17   | 0.671904922040424 | 1 |
| COPD-CHD ENSG0000166704 | 19 | 89  | 8  | 4E+05 | 0.037621 | ZNF606  | 0.671904922040424 | 1 |

|          |                 |    |      |    |       |          |              |                   |   |
|----------|-----------------|----|------|----|-------|----------|--------------|-------------------|---|
| COPD-CHD | ENSG00000174437 | 12 | 156  | 12 | 4E+05 | 0.037586 | ATP2A2       | 0.671904922040424 | 1 |
| COPD-CHD | ENSG00000185043 | 15 | 15   | 2  | 4E+05 | 0.03749  | CIB1         | 0.671732160852713 | 1 |
| COPD-CHD | ENSG00000115507 | 2  | 10   | 5  | 4E+05 | 0.037432 | OTX1         | 0.671343464597478 | 1 |
| COPD-CHD | ENSG00000103740 | 15 | 253  | 36 | 4E+05 | 0.03741  | ACSBG1       | 0.671343464597478 | 1 |
| COPD-CHD | ENSG00000065135 | 1  | 64   | 10 | 4E+05 | 0.037348 | GNAI3        | 0.67113884159378  | 1 |
| COPD-CHD | ENSG00000254732 | 11 | 58   | 9  | 4E+05 | 0.037331 | RP11-691N7.1 | 0.67113884159378  | 1 |
| COPD-CHD | ENSG00000198625 | 1  | 123  | 9  | 4E+05 | 0.037303 | MDM4         | 0.67113884159378  | 1 |
| COPD-CHD | ENSG00000173486 | 11 | 3    | 2  | 4E+05 | 0.037238 | FKBP2        | 0.671118769980507 | 1 |
| COPD-CHD | ENSG00000181291 | 17 | 127  | 26 | 4E+05 | 0.037145 | TMEM132E     | 0.6700958         | 1 |
| COPD-CHD | ENSG00000205882 | 8  | 14   | 4  | 4E+05 | 0.037121 | DEFB134      | 0.6700958         | 1 |
| COPD-CHD | ENSG00000108443 | 17 | 87   | 10 | 4E+05 | 0.037025 | RPS6KB1      | 0.669236827956989 | 1 |
| COPD-CHD | ENSG00000157856 | 2  | 111  | 16 | 4E+05 | 0.036967 | DRC1         | 0.668842267123288 | 1 |
| COPD-CHD | ENSG0000006377  | 7  | 6    | 2  | 4E+05 | 0.036927 | DLX6         | 0.668772925563173 | 1 |
| COPD-CHD | ENSG00000114487 | 3  | 445  | 14 | 4E+05 | 0.036915 | MORC1        | 0.668772925563173 | 1 |
| COPD-CHD | ENSG00000169946 | 8  | 1056 | 75 | 4E+05 | 0.036912 | ZFPM2        | 0.668772925563173 | 1 |
| COPD-CHD | ENSG00000138308 | 10 | 12   | 5  | 4E+05 | 0.03684  | PLA2G12B     | 0.668772925563173 | 1 |
| COPD-CHD | ENSG00000105507 | 19 | 107  | 7  | 4E+05 | 0.036831 | CABP5        | 0.668772925563173 | 1 |
| COPD-CHD | ENSG00000113318 | 5  | 636  | 23 | 4E+05 | 0.036765 | MSH3         | 0.668772925563173 | 1 |
| COPD-CHD | ENSG00000173338 | 11 | 2    | 1  | 4E+05 | 0.036755 | KCNK7        | 0.668772925563173 | 1 |
| COPD-CHD | ENSG00000181450 | 1  | 275  | 14 | 4E+05 | 0.0367   | ZNF678       | 0.668772925563173 | 1 |
| COPD-CHD | ENSG00000100285 | 22 | 27   | 6  | 4E+05 | 0.036696 | NEFH         | 0.668772925563173 | 1 |
| COPD-CHD | ENSG00000163328 | 2  | 92   | 9  | 4E+05 | 0.036579 | GPR155       | 0.668361945652174 | 1 |
| COPD-CHD | ENSG00000179772 | 20 | 2    | 1  | 4E+05 | 0.036419 | FOXS1        | 0.666096665677547 | 1 |
| COPD-CHD | ENSG00000197361 | 15 | 10   | 4  | 4E+05 | 0.036285 | FBXL22       | 0.664302905940594 | 1 |
| COPD-CHD | ENSG00000161850 | 12 | 46   | 8  | 4E+05 | 0.036244 | KRT82        | 0.664209914767096 | 1 |
| COPD-CHD | ENSG00000104140 | 15 | 1    | 1  | 4E+05 | 0.036215 | RHOV         | 0.664209914767096 | 1 |
| COPD-CHD | ENSG00000135913 | 2  | 201  | 10 | 4E+05 | 0.036155 | USP37        | 0.663894841112215 | 1 |
| COPD-CHD | ENSG00000152953 | 4  | 1975 | 97 | 4E+05 | 0.036134 | STK32B       | 0.663894841112215 | 1 |
| COPD-CHD | ENSG00000150722 | 2  | 328  | 29 | 4E+05 | 0.036125 | PPP1R1C      | 0.663894841112215 | 1 |
| COPD-CHD | ENSG00000169251 | 3  | 347  | 19 | 4E+05 | 0.036088 | NMD3         | 0.663894841112215 | 1 |
| COPD-CHD | ENSG00000032219 | 14 | 99   | 12 | 4E+05 | 0.036028 | ARID4A       | 0.663894841112215 | 1 |
| COPD-CHD | ENSG00000140090 | 14 | 733  | 56 | 4E+05 | 0.03601  | SLC24A4      | 0.663894841112215 | 1 |
| COPD-CHD | ENSG00000106804 | 9  | 207  | 19 | 4E+05 | 0.035963 | C5           | 0.663894841112215 | 1 |

|                          |    |      |    |       |          |            |                   |   |
|--------------------------|----|------|----|-------|----------|------------|-------------------|---|
| COPD-CHD ENSG00000261611 | 16 | 72   | 13 | 4E+05 | 0.035827 | AC010547.9 | 0.662477057       | 1 |
| COPD-CHD ENSG00000205835 | 3  | 107  | 19 | 4E+05 | 0.03582  | GMNC       | 0.662477057       | 1 |
| COPD-CHD ENSG00000145721 | 5  | 71   | 10 | 4E+05 | 0.035728 | LIX1       | 0.661970388777555 | 1 |
| COPD-CHD ENSG00000105321 | 19 | 52   | 5  | 4E+05 | 0.035636 | CCDC9      | 0.660928060180542 | 1 |
| COPD-CHD ENSG00000083290 | 17 | 150  | 7  | 4E+05 | 0.035616 | ULK2       | 0.660928060180542 | 1 |
| COPD-CHD ENSG00000112137 | 6  | 1329 | 61 | 4E+05 | 0.035572 | PHACTR1    | 0.660928060180542 | 1 |
| COPD-CHD ENSG00000179837 | 3  | 8    | 4  | 4E+05 | 0.03551  | RBM15B     | 0.660578883299799 | 1 |
| COPD-CHD ENSG00000176904 | 11 | 2    | 1  | 4E+05 | 0.035474 | OR51HIP    | 0.660573750251762 | 1 |
| COPD-CHD ENSG00000122779 | 7  | 190  | 19 | 4E+05 | 0.035422 | TRIM24     | 0.660270364919355 | 1 |
| COPD-CHD ENSG00000175003 | 6  | 101  | 21 | 4E+05 | 0.03534  | SLC22A1    | 0.659406599394551 | 1 |
| COPD-CHD ENSG00000146166 | 6  | 37   | 11 | 4E+05 | 0.035332 | LGSN       | 0.659406599394551 | 1 |
| COPD-CHD ENSG00000197309 | 11 | 6    | 2  | 4E+05 | 0.035249 | OR10D3     | 0.659038684529828 | 1 |
| COPD-CHD ENSG00000135100 | 12 | 84   | 14 | 4E+05 | 0.035233 | HNF1A      | 0.659038684529828 | 1 |
| COPD-CHD ENSG00000077380 | 2  | 110  | 14 | 4E+05 | 0.035159 | DYNC112    | 0.658688013171226 | 1 |
| COPD-CHD ENSG00000114395 | 3  | 5    | 2  | 4E+05 | 0.035066 | CYB561D2   | 0.657611973630832 | 1 |
| COPD-CHD ENSG00000182896 | 17 | 6    | 3  | 4E+05 | 0.034955 | TMEM95     | 0.656195842639594 | 1 |
| COPD-CHD ENSG00000198765 | 1  | 325  | 17 | 4E+05 | 0.03487  | SYCP1      | 0.655265416666667 | 1 |
| COPD-CHD ENSG00000115840 | 2  | 451  | 27 | 4E+05 | 0.034782 | SLC25A12   | 0.654276665310275 | 1 |
| COPD-CHD ENSG00000172938 | 11 | 1    | 1  | 4E+05 | 0.034776 | MRGPRD     | 0.654276665310275 | 1 |
| COPD-CHD ENSG00000189050 | 17 | 22   | 5  | 4E+05 | 0.034776 | RNFT1      | 0.654276665310275 | 1 |
| COPD-CHD ENSG00000108294 | 17 | 28   | 9  | 4E+05 | 0.034674 | PSMB3      | 0.654241769387755 | 1 |
| COPD-CHD ENSG00000108424 | 17 | 40   | 7  | 4E+05 | 0.034625 | KPNB1      | 0.653984550561798 | 1 |
| COPD-CHD ENSG00000173334 | 8  | 22   | 9  | 4E+05 | 0.034569 | TRIB1      | 0.653594457055215 | 1 |
| COPD-CHD ENSG00000017260 | 3  | 249  | 23 | 4E+05 | 0.034551 | ATP2C1     | 0.653594457055215 | 1 |
| COPD-CHD ENSG00000143442 | 1  | 72   | 5  | 4E+05 | 0.034536 | POGZ       | 0.653594457055215 | 1 |
| COPD-CHD ENSG00000136492 | 17 | 273  | 17 | 4E+05 | 0.034529 | BRIP1      | 0.653594457055215 | 1 |
| COPD-CHD ENSG00000181754 | 1  | 9    | 4  | 4E+05 | 0.034461 | AMIGO1     | 0.653594457055215 | 1 |
| COPD-CHD ENSG00000183914 | 17 | 250  | 32 | 4E+05 | 0.03443  | DNAH2      | 0.653594457055215 | 1 |
| COPD-CHD ENSG00000005249 | 7  | 267  | 16 | 4E+05 | 0.034341 | PRKAR2B    | 0.653291595679012 | 1 |
| COPD-CHD ENSG00000079557 | 4  | 49   | 7  | 4E+05 | 0.034317 | AFM        | 0.653291595679012 | 1 |
| COPD-CHD ENSG00000164221 | 5  | 52   | 9  | 4E+05 | 0.034249 | CCDC112    | 0.652884803092784 | 1 |
| COPD-CHD ENSG00000137821 | 15 | 218  | 19 | 4E+05 | 0.034239 | LRRC49     | 0.652884803092784 | 1 |
| COPD-CHD ENSG00000084754 | 2  | 98   | 3  | 4E+05 | 0.034227 | HADHA      | 0.652884803092784 | 1 |

|          |                 |    |      |    |       |          |             |                   |   |
|----------|-----------------|----|------|----|-------|----------|-------------|-------------------|---|
| COPD-CHD | ENSG00000148604 | 10 | 59   | 12 | 4E+05 | 0.034185 | RGR         | 0.652884803092784 | 1 |
| COPD-CHD | ENSG00000136451 | 17 | 24   | 5  | 4E+05 | 0.034047 | VEZF1       | 0.651721611801242 | 1 |
| COPD-CHD | ENSG00000072364 | 5  | 181  | 12 | 4E+05 | 0.033996 | AFF4        | 0.65141972642487  | 1 |
| COPD-CHD | ENSG00000182858 | 22 | 76   | 5  | 4E+05 | 0.033983 | ALG12       | 0.65141972642487  | 1 |
| COPD-CHD | ENSG00000189129 | 10 | 76   | 13 | 4E+05 | 0.0339   | PLAC9       | 0.650929283489097 | 1 |
| COPD-CHD | ENSG00000196867 | 19 | 47   | 10 | 4E+05 | 0.033821 | ZFP28       | 0.650087433471934 | 1 |
| COPD-CHD | ENSG00000163947 | 3  | 1056 | 78 | 4E+05 | 0.03372  | ARHGEF3     | 0.648820520291363 | 1 |
| COPD-CHD | ENSG00000109832 | 11 | 65   | 11 | 4E+05 | 0.033713 | DDX25       | 0.648820520291363 | 1 |
| COPD-CHD | ENSG00000120094 | 17 | 4    | 1  | 4E+05 | 0.033566 | HOXB1       | 0.647204281543274 | 1 |
| COPD-CHD | ENSG00000189079 | 12 | 140  | 17 | 4E+05 | 0.033532 | ARID2       | 0.647204281543274 | 1 |
| COPD-CHD | ENSG00000114054 | 3  | 111  | 13 | 4E+05 | 0.03339  | PCCB        | 0.645156206896552 | 1 |
| COPD-CHD | ENSG00000124224 | 20 | 214  | 17 | 4E+05 | 0.033256 | PPP4R1L     | 0.643239221757322 | 1 |
| COPD-CHD | ENSG00000149782 | 11 | 27   | 9  | 4E+05 | 0.033197 | PLCB3       | 0.642770394764398 | 1 |
| COPD-CHD | ENSG00000167578 | 19 | 65   | 13 | 4E+05 | 0.033167 | RAB4B       | 0.642770394764398 | 1 |
| COPD-CHD | ENSG00000064102 | 12 | 76   | 13 | 4E+05 | 0.03308  | ASUN        | 0.641849192025184 | 1 |
| COPD-CHD | ENSG00000168116 | 6  | 6    | 2  | 4E+05 | 0.033014 | KIAA1586    | 0.641241464285714 | 1 |
| COPD-CHD | ENSG00000131378 | 3  | 609  | 56 | 4E+05 | 0.03297  | RFTN1       | 0.641060220820189 | 1 |
| COPD-CHD | ENSG00000051825 | 12 | 236  | 10 | 4E+05 | 0.032934 | MPHOSPH9    | 0.641034309473684 | 1 |
| COPD-CHD | ENSG00000186517 | 1  | 42   | 10 | 4E+05 | 0.032881 | ARHGAP30    | 0.640677103266596 | 1 |
| COPD-CHD | ENSG00000162971 | 2  | 46   | 9  | 4E+05 | 0.032864 | TYW5        | 0.640677103266596 | 1 |
| COPD-CHD | ENSG00000116586 | 1  | 6    | 3  | 4E+05 | 0.032847 | LAMTOR2     | 0.640677103266596 | 1 |
| COPD-CHD | ENSG00000144426 | 2  | 292  | 19 | 4E+05 | 0.032845 | NBEAL1      | 0.640677103266596 | 1 |
| COPD-CHD | ENSG00000118513 | 6  | 59   | 9  | 4E+05 | 0.03273  | MYB         | 0.640434317460317 | 1 |
| COPD-CHD | ENSG00000077585 | 1  | 233  | 17 | 4E+05 | 0.032625 | GPR137B     | 0.639056011652543 | 1 |
| COPD-CHD | ENSG00000105509 | 19 | 44   | 9  | 4E+05 | 0.03261  | HAS1        | 0.639056011652543 | 1 |
| COPD-CHD | ENSG00000259003 | 14 | 6    | 2  | 4E+05 | 0.032608 | AE000662.92 | 0.639056011652543 | 1 |
| COPD-CHD | ENSG00000184220 | 3  | 465  | 24 | 4E+05 | 0.032542 | CMSS1       | 0.639056011652543 | 1 |
| COPD-CHD | ENSG00000169612 | 15 | 6    | 2  | 4E+05 | 0.032439 | FAM103A1    | 0.638116541489362 | 1 |
| COPD-CHD | ENSG00000177666 | 11 | 14   | 4  | 4E+05 | 0.03235  | PNPLA2      | 0.63704350372737  | 1 |
| COPD-CHD | ENSG00000203485 | 14 | 127  | 17 | 4E+05 | 0.03235  | INF2        | 0.63704350372737  | 1 |
| COPD-CHD | ENSG00000176495 | 11 | 2    | 1  | 4E+05 | 0.032296 | OR5AN1      | 0.63704350372737  | 1 |
| COPD-CHD | ENSG00000070366 | 17 | 573  | 21 | 4E+05 | 0.032268 | SMG6        | 0.63704350372737  | 1 |
| COPD-CHD | ENSG00000156026 | 10 | 160  | 10 | 4E+05 | 0.03224  | MCU         | 0.63704350372737  | 1 |

|          |                 |    |     |    |       |          |              |                   |   |
|----------|-----------------|----|-----|----|-------|----------|--------------|-------------------|---|
| COPD-CHD | ENSG00000105352 | 19 | 32  | 6  | 4E+05 | 0.032224 | CEACAM4      | 0.63704350372737  | 1 |
| COPD-CHD | ENSG00000110375 | 11 | 96  | 18 | 4E+05 | 0.032205 | UPK2         | 0.63704350372737  | 1 |
| COPD-CHD | ENSG00000108826 | 17 | 9   | 2  | 4E+05 | 0.032065 | MRPL27       | 0.636173728540773 | 1 |
| COPD-CHD | ENSG00000133958 | 14 | 765 | 24 | 4E+05 | 0.032061 | UNC79        | 0.636173728540773 | 1 |
| COPD-CHD | ENSG00000141526 | 17 | 45  | 12 | 4E+05 | 0.032053 | SLC16A3      | 0.636173728540773 | 1 |
| COPD-CHD | ENSG00000131899 | 17 | 42  | 6  | 4E+05 | 0.031964 | LLGL1        | 0.636173728540773 | 1 |
| COPD-CHD | ENSG00000184599 | 1  | 16  | 4  | 4E+05 | 0.031961 | FAM19A3      | 0.636173728540773 | 1 |
| COPD-CHD | ENSG00000215717 | 1  | 24  | 6  | 4E+05 | 0.03194  | TMEM167B     | 0.636173728540773 | 1 |
| COPD-CHD | ENSG00000076604 | 17 | 8   | 3  | 4E+05 | 0.031904 | TRAF4        | 0.636173728540773 | 1 |
| COPD-CHD | ENSG00000160097 | 1  | 12  | 4  | 4E+05 | 0.031862 | FNDC5        | 0.636173728540773 | 1 |
| COPD-CHD | ENSG00000198218 | 3  | 58  | 10 | 4E+05 | 0.031767 | QRICH1       | 0.635718178571429 | 1 |
| COPD-CHD | ENSG00000268870 | 19 | 266 | 7  | 4E+05 | 0.031706 | CTD-3105H1   | 0.635184881906826 | 1 |
| COPD-CHD | ENSG00000239474 | 2  | 33  | 11 | 4E+05 | 0.031666 | KLHL41       | 0.635071590021692 | 1 |
| COPD-CHD | ENSG00000143702 | 1  | 188 | 17 | 4E+05 | 0.031647 | CEP170       | 0.635071590021692 | 1 |
| COPD-CHD | ENSG00000260272 | 16 | 13  | 8  | 4E+05 | 0.031641 | RP11-20I23.1 | 0.635071590021692 | 1 |
| COPD-CHD | ENSG00000127125 | 1  | 35  | 5  | 4E+05 | 0.031625 | PPCS         | 0.635071590021692 | 1 |
| COPD-CHD | ENSG00000100479 | 14 | 94  | 5  | 4E+05 | 0.031589 | POLE2        | 0.635071590021692 | 1 |
| COPD-CHD | ENSG00000108829 | 17 | 43  | 7  | 4E+05 | 0.031571 | LRRRC59      | 0.635071590021692 | 1 |
| COPD-CHD | ENSG00000172320 | 11 | 4   | 1  | 4E+05 | 0.031518 | OR5A1        | 0.635071590021692 | 1 |
| COPD-CHD | ENSG00000253626 | 10 | 15  | 4  | 4E+05 | 0.031512 | EIF5AL1      | 0.635071590021692 | 1 |
| COPD-CHD | ENSG00000164180 | 5  | 120 | 16 | 4E+05 | 0.031494 | TMEM161B     | 0.635071590021692 | 1 |
| COPD-CHD | ENSG00000135185 | 7  | 69  | 7  | 4E+05 | 0.031476 | TMEM243      | 0.635071590021692 | 1 |
| COPD-CHD | ENSG00000183742 | 7  | 223 | 19 | 4E+05 | 0.031428 | MACC1        | 0.635071590021692 | 1 |
| COPD-CHD | ENSG00000069956 | 15 | 237 | 22 | 4E+05 | 0.031427 | MAPK6        | 0.635071590021692 | 1 |
| COPD-CHD | ENSG00000163508 | 3  | 10  | 4  | 4E+05 | 0.031383 | EOMES        | 0.635071590021692 | 1 |
| COPD-CHD | ENSG00000070193 | 5  | 139 | 8  | 4E+05 | 0.031376 | FGF10        | 0.635071590021692 | 1 |
| COPD-CHD | ENSG00000111237 | 12 | 20  | 5  | 4E+05 | 0.031363 | VPS29        | 0.635071590021692 | 1 |
| COPD-CHD | ENSG00000122515 | 7  | 30  | 7  | 4E+05 | 0.031292 | ZMIZ2        | 0.635071590021692 | 1 |
| COPD-CHD | ENSG00000115568 | 2  | 34  | 4  | 4E+05 | 0.031244 | ZNF142       | 0.635071590021692 | 1 |
| COPD-CHD | ENSG00000272410 | 3  | 99  | 12 | 4E+05 | 0.031176 | RP11-438J1.1 | 0.635071590021692 | 1 |
| COPD-CHD | ENSG00000100012 | 22 | 101 | 10 | 4E+05 | 0.031096 | SEC14L3      | 0.635071590021692 | 1 |
| COPD-CHD | ENSG00000254834 | 11 | 3   | 2  | 4E+05 | 0.031079 | OR5M10       | 0.635071590021692 | 1 |
| COPD-CHD | ENSG00000267881 | 19 | 98  | 10 | 4E+05 | 0.031047 | CEA          | 0.635071590021692 | 1 |

|          |                 |    |      |     |       |          |          |                   |   |
|----------|-----------------|----|------|-----|-------|----------|----------|-------------------|---|
| COPD-CHD | ENSG00000178999 | 17 | 15   | 6   | 4E+05 | 0.03098  | AURKB    | 0.635071590021692 | 1 |
| COPD-CHD | ENSG00000123066 | 12 | 435  | 25  | 4E+05 | 0.03092  | MED13L   | 0.635071590021692 | 1 |
| COPD-CHD | ENSG00000147434 | 8  | 105  | 11  | 4E+05 | 0.030896 | CHRNA6   | 0.635071590021692 | 1 |
| COPD-CHD | ENSG00000204852 | 12 | 61   | 8   | 4E+05 | 0.03088  | TCTN1    | 0.635071590021692 | 1 |
| COPD-CHD | ENSG00000143153 | 1  | 101  | 16  | 4E+05 | 0.030871 | ATP1B1   | 0.635071590021692 | 1 |
| COPD-CHD | ENSG00000035681 | 8  | 148  | 11  | 4E+05 | 0.030803 | NSMAF    | 0.635071590021692 | 1 |
| COPD-CHD | ENSG00000101489 | 18 | 788  | 81  | 4E+05 | 0.030798 | CELF4    | 0.635071590021692 | 1 |
| COPD-CHD | ENSG00000123352 | 12 | 328  | 18  | 4E+05 | 0.030719 | SPATS2   | 0.635071590021692 | 1 |
| COPD-CHD | ENSG00000068001 | 3  | 1    | 1   | 4E+05 | 0.030601 | HYAL2    | 0.633642879059351 | 1 |
| COPD-CHD | ENSG00000125630 | 2  | 100  | 10  | 4E+05 | 0.030472 | POLR1B   | 0.631679094170404 | 1 |
| COPD-CHD | ENSG00000135973 | 2  | 1    | 1   | 4E+05 | 0.030431 | GPR45    | 0.631537172839506 | 1 |
| COPD-CHD | ENSG00000165512 | 10 | 16   | 4   | 4E+05 | 0.03029  | ZNF22    | 0.629317292134831 | 1 |
| COPD-CHD | ENSG00000187871 | 6  | 425  | 25  | 4E+05 | 0.030237 | GFRAL    | 0.628922797525309 | 1 |
| COPD-CHD | ENSG00000212938 | 21 | 1    | 1   | 4E+05 | 0.03019  | KRTAP6-3 | 0.628652353603604 | 1 |
| COPD-CHD | ENSG00000114204 | 3  | 102  | 10  | 4E+05 | 0.030117 | SERPINI2 | 0.627839286358512 | 1 |
| COPD-CHD | ENSG00000180116 | 12 | 711  | 28  | 4E+05 | 0.030072 | C12orf40 | 0.627608749435666 | 1 |
| COPD-CHD | ENSG00000103723 | 15 | 112  | 18  | 4E+05 | 0.029918 | AP3B2    | 0.625100268926554 | 1 |
| COPD-CHD | ENSG00000168386 | 3  | 379  | 22  | 4E+05 | 0.029866 | FILIP1L  | 0.624719690045249 | 1 |
| COPD-CHD | ENSG00000136653 | 1  | 171  | 24  | 4E+05 | 0.029863 | RASSF5   | 0.624719690045249 | 1 |
| COPD-CHD | ENSG00000161405 | 17 | 217  | 5   | 4E+05 | 0.029852 | IKZF3    | 0.624719690045249 | 1 |
| COPD-CHD | ENSG00000166884 | 11 | 4    | 1   | 4E+05 | 0.029843 | OR4D6    | 0.624719690045249 | 1 |
| COPD-CHD | ENSG00000187498 | 13 | 691  | 72  | 4E+05 | 0.029787 | COL4A1   | 0.624719690045249 | 1 |
| COPD-CHD | ENSG00000115556 | 2  | 43   | 5   | 4E+05 | 0.029786 | PLCD4    | 0.624719690045249 | 1 |
| COPD-CHD | ENSG00000126561 | 17 | 54   | 6   | 4E+05 | 0.029737 | STAT5A   | 0.624719690045249 | 1 |
| COPD-CHD | ENSG00000111252 | 12 | 36   | 4   | 4E+05 | 0.029603 | SH2B3    | 0.624160858608894 | 1 |
| COPD-CHD | ENSG00000091536 | 17 | 130  | 16  | 4E+05 | 0.029582 | MYO15A   | 0.624160858608894 | 1 |
| COPD-CHD | ENSG00000119655 | 14 | 47   | 5   | 4E+05 | 0.0295   | NPC2     | 0.623410857142857 | 1 |
| COPD-CHD | ENSG00000150760 | 10 | 1790 | 116 | 4E+05 | 0.029491 | DOCK1    | 0.623410857142857 | 1 |
| COPD-CHD | ENSG00000099991 | 22 | 191  | 22  | 4E+05 | 0.029479 | CABIN1   | 0.623410857142857 | 1 |
| COPD-CHD | ENSG00000064651 | 5  | 158  | 12  | 4E+05 | 0.029429 | SLC12A2  | 0.623410857142857 | 1 |
| COPD-CHD | ENSG00000115526 | 2  | 41   | 6   | 4E+05 | 0.029405 | CHST10   | 0.623410857142857 | 1 |
| COPD-CHD | ENSG00000111275 | 12 | 36   | 5   | 4E+05 | 0.029397 | ALDH2    | 0.623410857142857 | 1 |
| COPD-CHD | ENSG00000123933 | 4  | 35   | 4   | 4E+05 | 0.029346 | MXD4     | 0.623410857142857 | 1 |

|          |                 |    |      |    |       |          |             |                   |   |
|----------|-----------------|----|------|----|-------|----------|-------------|-------------------|---|
| COPD-CHD | ENSG00000261701 | 16 | 42   | 7  | 4E+05 | 0.029251 | HPR         | 0.623133918202765 | 1 |
| COPD-CHD | ENSG00000173110 | 1  | 8    | 3  | 4E+05 | 0.029226 | HSPA6       | 0.623133918202765 | 1 |
| COPD-CHD | ENSG00000136731 | 2  | 249  | 17 | 4E+05 | 0.029215 | UGGT1       | 0.623133918202765 | 1 |
| COPD-CHD | ENSG00000120253 | 6  | 39   | 3  | 4E+05 | 0.029187 | NUP43       | 0.623133918202765 | 1 |
| COPD-CHD | ENSG00000197261 | 6  | 50   | 6  | 4E+05 | 0.029167 | C6orf141    | 0.623133918202765 | 1 |
| COPD-CHD | ENSG00000156599 | 11 | 48   | 8  | 4E+05 | 0.029166 | ZDHHC5      | 0.623133918202765 | 1 |
| COPD-CHD | ENSG00000185313 | 3  | 304  | 24 | 4E+05 | 0.029098 | SCN10A      | 0.623133918202765 | 1 |
| COPD-CHD | ENSG00000077044 | 2  | 225  | 23 | 4E+05 | 0.029045 | DGKD        | 0.623133918202765 | 1 |
| COPD-CHD | ENSG00000107745 | 10 | 392  | 8  | 4E+05 | 0.028962 | MICU1       | 0.622716676744186 | 1 |
| COPD-CHD | ENSG00000268556 | 2  | 7    | 3  | 4E+05 | 0.028931 | AC012360.1  | 0.622716676744186 | 1 |
| COPD-CHD | ENSG00000169826 | 10 | 112  | 12 | 4E+05 | 0.028899 | CSGALNACT10 | 0.622716676744186 | 1 |
| COPD-CHD | ENSG00000175161 | 3  | 2853 | 49 | 4E+05 | 0.028886 | CADM2       | 0.622695752625438 | 1 |
| COPD-CHD | ENSG00000155307 | 21 | 324  | 31 | 4E+05 | 0.028777 | SAMSN1      | 0.621630265186916 | 1 |
| COPD-CHD | ENSG00000173041 | 7  | 176  | 12 | 4E+05 | 0.028776 | ZNF680      | 0.621630265186916 | 1 |
| COPD-CHD | ENSG00000187231 | 2  | 372  | 20 | 4E+05 | 0.028772 | SESTD1      | 0.621630265186916 | 1 |
| COPD-CHD | ENSG00000086200 | 5  | 382  | 18 | 4E+05 | 0.028757 | IPO11       | 0.621630265186916 | 1 |
| COPD-CHD | ENSG00000171570 | 19 | 94   | 16 | 4E+05 | 0.028745 | RAB4B-EGLT  | 0.621630265186916 | 1 |
| COPD-CHD | ENSG00000106536 | 7  | 1452 | 57 | 4E+05 | 0.028686 | POU6F2      | 0.621630265186916 | 1 |
| COPD-CHD | ENSG00000011021 | 1  | 200  | 14 | 4E+05 | 0.028684 | CLCN6       | 0.621630265186916 | 1 |
| COPD-CHD | ENSG00000112208 | 6  | 22   | 4  | 4E+05 | 0.02866  | BAG2        | 0.621630265186916 | 1 |
| COPD-CHD | ENSG00000124523 | 6  | 64   | 10 | 4E+05 | 0.028633 | SIRT5       | 0.621630265186916 | 1 |
| COPD-CHD | ENSG00000109686 | 4  | 517  | 18 | 4E+05 | 0.028553 | SH3D19      | 0.621630265186916 | 1 |
| COPD-CHD | ENSG00000219435 | 11 | 5    | 2  | 4E+05 | 0.0285   | TEX40       | 0.621630265186916 | 1 |
| COPD-CHD | ENSG00000185800 | 19 | 20   | 7  | 4E+05 | 0.028428 | DMWD        | 0.621630265186916 | 1 |
| COPD-CHD | ENSG00000138413 | 2  | 47   | 7  | 4E+05 | 0.028422 | IDH1        | 0.621630265186916 | 1 |
| COPD-CHD | ENSG00000160654 | 11 | 19   | 5  | 4E+05 | 0.028347 | CD3G        | 0.621630265186916 | 1 |
| COPD-CHD | ENSG00000158109 | 1  | 11   | 3  | 4E+05 | 0.028332 | TPRG1L      | 0.621630265186916 | 1 |
| COPD-CHD | ENSG00000106780 | 9  | 108  | 10 | 4E+05 | 0.028229 | MEGF9       | 0.620668774078478 | 1 |
| COPD-CHD | ENSG00000205517 | 19 | 81   | 7  | 4E+05 | 0.028164 | RGL3        | 0.619976814285714 | 1 |
| COPD-CHD | ENSG00000119318 | 9  | 164  | 17 | 4E+05 | 0.028138 | RAD23B      | 0.619976814285714 | 1 |
| COPD-CHD | ENSG00000132170 | 3  | 340  | 22 | 4E+05 | 0.028126 | PPARG       | 0.619976814285714 | 1 |
| COPD-CHD | ENSG00000138867 | 22 | 36   | 5  | 4E+05 | 0.028119 | GUCD1       | 0.619976814285714 | 1 |
| COPD-CHD | ENSG00000111639 | 12 | 14   | 1  | 4E+05 | 0.028114 | MRPL51      | 0.619976814285714 | 1 |

|          |                 |    |      |    |       |          |              |                   |   |
|----------|-----------------|----|------|----|-------|----------|--------------|-------------------|---|
| COPD-CHD | ENSG00000120256 | 6  | 73   | 5  | 4E+05 | 0.027956 | LRP11        | 0.619083108982036 | 1 |
| COPD-CHD | ENSG00000131023 | 6  | 80   | 3  | 4E+05 | 0.027935 | LATS1        | 0.619083108982036 | 1 |
| COPD-CHD | ENSG00000144580 | 2  | 48   | 4  | 4E+05 | 0.027857 | RQCD1        | 0.618371893157263 | 1 |
| COPD-CHD | ENSG00000178078 | 19 | 68   | 11 | 4E+05 | 0.027765 | STAP2        | 0.617070450721154 | 1 |
| COPD-CHD | ENSG00000143740 | 1  | 129  | 16 | 4E+05 | 0.027764 | SNAP47       | 0.617070450721154 | 1 |
| COPD-CHD | ENSG00000048828 | 9  | 311  | 18 | 4E+05 | 0.027636 | FAM120A      | 0.615683465060241 | 1 |
| COPD-CHD | ENSG00000197170 | 17 | 50   | 9  | 4E+05 | 0.027635 | PSMD12       | 0.615683465060241 | 1 |
| COPD-CHD | ENSG00000031698 | 1  | 37   | 8  | 4E+05 | 0.027609 | SARS         | 0.615683465060241 | 1 |
| COPD-CHD | ENSG00000137460 | 4  | 112  | 26 | 4E+05 | 0.027598 | FHDC1        | 0.615683465060241 | 1 |
| COPD-CHD | ENSG00000138193 | 10 | 577  | 44 | 4E+05 | 0.027528 | PLCE1        | 0.615683465060241 | 1 |
| COPD-CHD | ENSG00000159352 | 1  | 17   | 4  | 4E+05 | 0.027516 | PSMD4        | 0.615683465060241 | 1 |
| COPD-CHD | ENSG00000118898 | 16 | 344  | 41 | 4E+05 | 0.027491 | PPL          | 0.615683465060241 | 1 |
| COPD-CHD | ENSG00000102970 | 16 | 46   | 11 | 4E+05 | 0.027476 | CCL17        | 0.615683465060241 | 1 |
| COPD-CHD | ENSG00000229644 | 10 | 7    | 2  | 4E+05 | 0.027424 | NAMPTL       | 0.615683465060241 | 1 |
| COPD-CHD | ENSG00000157578 | 21 | 106  | 8  | 4E+05 | 0.027412 | LCA5L        | 0.615683465060241 | 1 |
| COPD-CHD | ENSG00000116497 | 1  | 56   | 8  | 4E+05 | 0.027287 | S100PBP      | 0.61532185        | 1 |
| COPD-CHD | ENSG00000176148 | 11 | 285  | 18 | 4E+05 | 0.027219 | TCP11L1      | 0.614537886446886 | 1 |
| COPD-CHD | ENSG00000257767 | 12 | 24   | 3  | 4E+05 | 0.027161 | RP11-162P23  | 0.613978057457213 | 1 |
| COPD-CHD | ENSG00000186298 | 12 | 50   | 8  | 4E+05 | 0.027119 | PPP1CC       | 0.613778982864137 | 1 |
| COPD-CHD | ENSG00000163884 | 3  | 23   | 6  | 4E+05 | 0.02705  | KLF15        | 0.612967585784314 | 1 |
| COPD-CHD | ENSG00000130997 | 4  | 399  | 11 | 4E+05 | 0.027039 | POLN         | 0.612967585784314 | 1 |
| COPD-CHD | ENSG00000156218 | 15 | 1003 | 40 | 4E+05 | 0.027015 | ADAMTSL3     | 0.612967585784314 | 1 |
| COPD-CHD | ENSG00000135837 | 1  | 390  | 16 | 4E+05 | 0.026984 | CEP350       | 0.612967585784314 | 1 |
| COPD-CHD | ENSG00000198054 | 21 | 112  | 12 | 4E+05 | 0.02698  | DSCR8        | 0.612967585784314 | 1 |
| COPD-CHD | ENSG00000118007 | 3  | 588  | 22 | 4E+05 | 0.026917 | STAG1        | 0.612967585784314 | 1 |
| COPD-CHD | ENSG00000259030 | 1  | 653  | 49 | 4E+05 | 0.02689  | FPGT-TNNI310 | 0.612967585784314 | 1 |
| COPD-CHD | ENSG00000116783 | 1  | 653  | 49 | 4E+05 | 0.02689  | TNNI3K       | 0.612967585784314 | 1 |
| COPD-CHD | ENSG00000163159 | 1  | 17   | 7  | 4E+05 | 0.026837 | VPS72        | 0.612967585784314 | 1 |
| COPD-CHD | ENSG00000165501 | 14 | 52   | 6  | 4E+05 | 0.026826 | LRR1         | 0.612967585784314 | 1 |
| COPD-CHD | ENSG00000168899 | 2  | 22   | 6  | 4E+05 | 0.026804 | VAMP5        | 0.612967585784314 | 1 |
| COPD-CHD | ENSG00000142444 | 19 | 12   | 5  | 4E+05 | 0.02679  | C19orf52     | 0.612967585784314 | 1 |
| COPD-CHD | ENSG00000114933 | 2  | 202  | 20 | 4E+05 | 0.026636 | INO80D       | 0.612594870646766 | 1 |
| COPD-CHD | ENSG00000140107 | 14 | 21   | 5  | 4E+05 | 0.026565 | SLC25A47     | 0.611722808219178 | 1 |

|          |                 |    |      |    |       |          |            |                   |   |
|----------|-----------------|----|------|----|-------|----------|------------|-------------------|---|
| COPD-CHD | ENSG00000111249 | 12 | 345  | 27 | 4E+05 | 0.026558 | CUX2       | 0.611722808219178 | 1 |
| COPD-CHD | ENSG00000141279 | 17 | 137  | 10 | 4E+05 | 0.026518 | NPEPPS     | 0.611722808219178 | 1 |
| COPD-CHD | ENSG00000197296 | 20 | 13   | 4  | 4E+05 | 0.026428 | FITM2      | 0.610850185       | 1 |
| COPD-CHD | ENSG00000156471 | 8  | 135  | 15 | 4E+05 | 0.026412 | PTDSS1     | 0.610850185       | 1 |
| COPD-CHD | ENSG00000132017 | 19 | 8    | 3  | 4E+05 | 0.026354 | DCAF15     | 0.61066643358396  | 1 |
| COPD-CHD | ENSG00000183137 | 6  | 83   | 10 | 4E+05 | 0.02633  | CEP57L1    | 0.61066643358396  | 1 |
| COPD-CHD | ENSG00000165502 | 14 | 6    | 2  | 4E+05 | 0.026288 | RPL36AL    | 0.61066643358396  | 1 |
| COPD-CHD | ENSG00000107263 | 9  | 398  | 24 | 4E+05 | 0.02628  | RAPGEF1    | 0.61066643358396  | 1 |
| COPD-CHD | ENSG00000164038 | 4  | 78   | 18 | 4E+05 | 0.026261 | SLC9B2     | 0.61066643358396  | 1 |
| COPD-CHD | ENSG00000156587 | 11 | 48   | 8  | 4E+05 | 0.026151 | UBE2L6     | 0.609783279949559 | 1 |
| COPD-CHD | ENSG00000023228 | 2  | 128  | 10 | 4E+05 | 0.026138 | NDUFS1     | 0.609783279949559 | 1 |
| COPD-CHD | ENSG00000111737 | 12 | 66   | 12 | 4E+05 | 0.026059 | RAB35      | 0.609174423514539 | 1 |
| COPD-CHD | ENSG00000269554 | 1  | 4    | 2  | 4E+05 | 0.026011 | AL590822.2 | 0.608822026582279 | 1 |
| COPD-CHD | ENSG00000074582 | 2  | 9    | 2  | 4E+05 | 0.025794 | BCS1L      | 0.604508053231939 | 1 |
| COPD-CHD | ENSG00000170266 | 3  | 331  | 26 | 4E+05 | 0.02579  | GLB1       | 0.604508053231939 | 1 |
| COPD-CHD | ENSG00000198546 | 10 | 69   | 13 | 4E+05 | 0.02577  | ZNF511     | 0.604508053231939 | 1 |
| COPD-CHD | ENSG00000129038 | 15 | 110  | 15 | 4E+05 | 0.02577  | LOXL1      | 0.604508053231939 | 1 |
| COPD-CHD | ENSG00000129933 | 19 | 74   | 8  | 4E+05 | 0.02575  | MAU2       | 0.604508053231939 | 1 |
| COPD-CHD | ENSG00000073050 | 19 | 107  | 16 | 4E+05 | 0.025715 | XRCC1      | 0.604508053231939 | 1 |
| COPD-CHD | ENSG00000182450 | 11 | 6    | 2  | 4E+05 | 0.02569  | KCNK4      | 0.604508053231939 | 1 |
| COPD-CHD | ENSG00000184990 | 14 | 43   | 7  | 4E+05 | 0.025687 | SIVA1      | 0.604508053231939 | 1 |
| COPD-CHD | ENSG00000196776 | 3  | 92   | 16 | 4E+05 | 0.025596 | CD47       | 0.604508053231939 | 1 |
| COPD-CHD | ENSG00000166862 | 22 | 388  | 46 | 4E+05 | 0.025527 | CACNG2     | 0.604508053231939 | 1 |
| COPD-CHD | ENSG00000171234 | 4  | 354  | 9  | 4E+05 | 0.025378 | UGT2B7     | 0.602393578947368 | 1 |
| COPD-CHD | ENSG00000162819 | 1  | 33   | 9  | 4E+05 | 0.025337 | BROX       | 0.602193402313625 | 1 |
| COPD-CHD | ENSG00000146757 | 7  | 88   | 8  | 4E+05 | 0.025192 | ZNF92      | 0.599517724581725 | 1 |
| COPD-CHD | ENSG00000113194 | 5  | 111  | 13 | 4E+05 | 0.025167 | FAF2       | 0.599517724581725 | 1 |
| COPD-CHD | ENSG00000138640 | 4  | 1231 | 46 | 4E+05 | 0.025119 | FAM13A     | 0.599323134193548 | 1 |
| COPD-CHD | ENSG00000268472 | 11 | 2    | 1  | 4E+05 | 0.025096 | AP002884.2 | 0.599323134193548 | 1 |
| COPD-CHD | ENSG00000149639 | 20 | 106  | 20 | 4E+05 | 0.025071 | SOGA1      | 0.599323134193548 | 1 |
| COPD-CHD | ENSG00000168140 | 16 | 24   | 5  | 4E+05 | 0.024936 | VASN       | 0.597268880829016 | 1 |
| COPD-CHD | ENSG00000064726 | 15 | 119  | 16 | 4E+05 | 0.024841 | BTBD1      | 0.595765150453956 | 1 |
| COPD-CHD | ENSG00000147573 | 8  | 102  | 9  | 4E+05 | 0.024791 | TRIM55     | 0.595338157142857 | 1 |

|          |                 |    |     |    |       |          |          |                   |   |
|----------|-----------------|----|-----|----|-------|----------|----------|-------------------|---|
| COPD-CHD | ENSG00000152583 | 4  | 182 | 13 | 4E+05 | 0.024746 | SPARCL1  | 0.595030280884265 | 1 |
| COPD-CHD | ENSG00000187266 | 19 | 5   | 2  | 4E+05 | 0.024721 | EPOR     | 0.595030280884265 | 1 |
| COPD-CHD | ENSG00000140836 | 16 | 635 | 71 | 4E+05 | 0.024652 | ZFHX3    | 0.594315687092569 | 1 |
| COPD-CHD | ENSG00000109189 | 4  | 80  | 6  | 4E+05 | 0.024607 | USP46    | 0.594005270234987 | 1 |
| COPD-CHD | ENSG00000110931 | 12 | 176 | 28 | 4E+05 | 0.024574 | CAMKK2   | 0.593984096732026 | 1 |
| COPD-CHD | ENSG00000138496 | 3  | 79  | 10 | 4E+05 | 0.024551 | PARP9    | 0.593984096732026 | 1 |
| COPD-CHD | ENSG00000136425 | 15 | 93  | 14 | 4E+05 | 0.024542 | CIB2     | 0.593984096732026 | 1 |
| COPD-CHD | ENSG00000178201 | 19 | 2   | 1  | 4E+05 | 0.024519 | VN1R1    | 0.593984096732026 | 1 |
| COPD-CHD | ENSG00000126391 | 11 | 32  | 8  | 4E+05 | 0.024506 | FRMD8    | 0.593984096732026 | 1 |
| COPD-CHD | ENSG00000120251 | 4  | 258 | 19 | 4E+05 | 0.024501 | GRIA2    | 0.593984096732026 | 1 |
| COPD-CHD | ENSG00000145425 | 4  | 4   | 2  | 4E+05 | 0.024496 | RPS3A    | 0.593984096732026 | 1 |
| COPD-CHD | ENSG00000101306 | 20 | 40  | 6  | 4E+05 | 0.024494 | MYLK2    | 0.593984096732026 | 1 |
| COPD-CHD | ENSG00000175745 | 5  | 6   | 2  | 4E+05 | 0.024487 | NR2F1    | 0.593984096732026 | 1 |
| COPD-CHD | ENSG00000147533 | 8  | 56  | 10 | 4E+05 | 0.024483 | GOLGA7   | 0.593984096732026 | 1 |
| COPD-CHD | ENSG00000154227 | 15 | 694 | 25 | 4E+05 | 0.024447 | CERS3    | 0.593984096732026 | 1 |
| COPD-CHD | ENSG00000167491 | 19 | 181 | 13 | 4E+05 | 0.024366 | GATAD2A  | 0.593984096732026 | 1 |
| COPD-CHD | ENSG00000090447 | 16 | 21  | 4  | 4E+05 | 0.024266 | TFAP4    | 0.593984096732026 | 1 |
| COPD-CHD | ENSG00000153933 | 17 | 79  | 5  | 4E+05 | 0.024228 | DGKE     | 0.593984096732026 | 1 |
| COPD-CHD | ENSG00000149243 | 11 | 7   | 3  | 4E+05 | 0.024213 | KLHL35   | 0.593984096732026 | 1 |
| COPD-CHD | ENSG00000113742 | 5  | 180 | 17 | 4E+05 | 0.024077 | CPEB4    | 0.593610409333333 | 1 |
| COPD-CHD | ENSG00000170748 | 11 | 6   | 2  | 4E+05 | 0.024064 | RBMXL2   | 0.593610409333333 | 1 |
| COPD-CHD | ENSG00000213281 | 1  | 12  | 3  | 4E+05 | 0.023806 | NRAS     | 0.588498323529412 | 1 |
| COPD-CHD | ENSG00000100425 | 22 | 110 | 10 | 4E+05 | 0.023805 | BRD1     | 0.588498323529412 | 1 |
| COPD-CHD | ENSG00000174942 | 11 | 8   | 3  | 4E+05 | 0.023754 | OR5R1    | 0.588498323529412 | 1 |
| COPD-CHD | ENSG00000101000 | 20 | 10  | 2  | 4E+05 | 0.023671 | PROCR    | 0.587517397315436 | 1 |
| COPD-CHD | ENSG00000101074 | 20 | 57  | 5  | 4E+05 | 0.023634 | R3HDML   | 0.587387491935484 | 1 |
| COPD-CHD | ENSG00000148935 | 11 | 466 | 34 | 4E+05 | 0.023586 | GAS2     | 0.586983480484522 | 1 |
| COPD-CHD | ENSG00000147509 | 8  | 126 | 18 | 4E+05 | 0.023583 | RGS20    | 0.586983480484522 | 1 |
| COPD-CHD | ENSG00000119965 | 10 | 32  | 7  | 4E+05 | 0.02358  | C10orf88 | 0.586983480484522 | 1 |
| COPD-CHD | ENSG00000152795 | 4  | 27  | 5  | 4E+05 | 0.023454 | HNRNPDL  | 0.586064748648649 | 1 |
| COPD-CHD | ENSG00000114942 | 2  | 3   | 1  | 4E+05 | 0.023425 | EEF1B2   | 0.586064748648649 | 1 |
| COPD-CHD | ENSG00000106460 | 7  | 202 | 9  | 4E+05 | 0.023371 | TMEM106B | 0.585573388888889 | 1 |
| COPD-CHD | ENSG00000164626 | 6  | 136 | 24 | 4E+05 | 0.023322 | KCNK5    | 0.585138537313433 | 1 |

|                          |    |      |     |       |          |            |                   |   |
|--------------------------|----|------|-----|-------|----------|------------|-------------------|---|
| COPD-CHD ENSG00000248483 | 5  | 6    | 2   | 4E+05 | 0.023239 | POU5F2     | 0.583848300271739 | 1 |
| COPD-CHD ENSG00000167778 | 12 | 29   | 8   | 4E+05 | 0.023239 | SPRYD3     | 0.583848300271739 | 1 |
| COPD-CHD ENSG00000153930 | 17 | 824  | 44  | 4E+05 | 0.023086 | ANKFN1     | 0.581584776566757 | 1 |
| COPD-CHD ENSG00000197415 | 3  | 760  | 32  | 4E+05 | 0.023076 | VEPH1      | 0.581584776566757 | 1 |
| COPD-CHD ENSG00000103591 | 15 | 103  | 9   | 4E+05 | 0.023059 | AAGAB      | 0.581584776566757 | 1 |
| COPD-CHD ENSG00000132464 | 4  | 75   | 10  | 4E+05 | 0.022966 | ENAM       | 0.580936123119015 | 1 |
| COPD-CHD ENSG00000129355 | 19 | 5    | 2   | 4E+05 | 0.022948 | CDKN2D     | 0.580936123119015 | 1 |
| COPD-CHD ENSG00000138029 | 2  | 76   | 8   | 4E+05 | 0.022908 | HADHB      | 0.580936123119015 | 1 |
| COPD-CHD ENSG00000159228 | 21 | 14   | 4   | 4E+05 | 0.022906 | CBR1       | 0.580936123119015 | 1 |
| COPD-CHD ENSG00000150593 | 10 | 57   | 12  | 4E+05 | 0.022868 | PDCD4      | 0.580936123119015 | 1 |
| COPD-CHD ENSG00000214919 | 3  | 2    | 1   | 4E+05 | 0.022837 | AC104472.1 | 0.580936123119015 | 1 |
| COPD-CHD ENSG00000163481 | 2  | 21   | 3   | 4E+05 | 0.022794 | RNF25      | 0.580936123119015 | 1 |
| COPD-CHD ENSG00000125966 | 20 | 57   | 8   | 4E+05 | 0.022747 | MMP24      | 0.580936123119015 | 1 |
| COPD-CHD ENSG00000203780 | 10 | 300  | 14  | 4E+05 | 0.022706 | FANK1      | 0.580714586445367 | 1 |
| COPD-CHD ENSG00000196937 | 7  | 92   | 6   | 4E+05 | 0.022642 | FAM3C      | 0.579879808864266 | 1 |
| COPD-CHD ENSG00000267873 | 12 | 3    | 2   | 4E+05 | 0.022634 | AC121757.1 | 0.579879808864266 | 1 |
| COPD-CHD ENSG00000103199 | 16 | 82   | 10  | 4E+05 | 0.022634 | ZNF500     | 0.579879808864266 | 1 |
| COPD-CHD ENSG00000140798 | 16 | 54   | 11  | 4E+05 | 0.022525 | ABCC12     | 0.579290368567455 | 1 |
| COPD-CHD ENSG00000178913 | 5  | 5    | 2   | 4E+05 | 0.022492 | TAF7       | 0.579247314763231 | 1 |
| COPD-CHD ENSG00000131504 | 5  | 167  | 23  | 4E+05 | 0.022488 | DIAPH1     | 0.579247314763231 | 1 |
| COPD-CHD ENSG00000157890 | 15 | 1123 | 101 | 4E+05 | 0.022467 | MEGF11     | 0.579247314763231 | 1 |
| COPD-CHD ENSG00000150433 | 11 | 53   | 11  | 4E+05 | 0.022446 | TMEM218    | 0.579247314763231 | 1 |
| COPD-CHD ENSG00000140632 | 16 | 129  | 19  | 4E+05 | 0.022437 | GLYR1      | 0.579247314763231 | 1 |
| COPD-CHD ENSG00000168159 | 1  | 25   | 8   | 4E+05 | 0.022389 | RNF187     | 0.579247314763231 | 1 |
| COPD-CHD ENSG00000162814 | 1  | 728  | 34  | 4E+05 | 0.022378 | SPATA17    | 0.579247314763231 | 1 |
| COPD-CHD ENSG00000145934 | 5  | 2140 | 185 | 4E+05 | 0.02234  | TENM2      | 0.579247314763231 | 1 |
| COPD-CHD ENSG00000172425 | 11 | 2    | 1   | 4E+05 | 0.022319 | TTC36      | 0.579247314763231 | 1 |
| COPD-CHD ENSG00000178074 | 2  | 92   | 13  | 4E+05 | 0.022244 | C2orf69    | 0.579247314763231 | 1 |
| COPD-CHD ENSG00000215012 | 22 | 32   | 5   | 4E+05 | 0.022151 | C22orf29   | 0.578522798022599 | 1 |
| COPD-CHD ENSG00000122490 | 18 | 111  | 16  | 4E+05 | 0.022095 | PQLC1      | 0.5778764427157   | 1 |
| COPD-CHD ENSG00000189320 | 7  | 55   | 10  | 4E+05 | 0.021911 | FAM180A    | 0.573875780453258 | 1 |
| COPD-CHD ENSG00000177731 | 17 | 21   | 6   | 4E+05 | 0.021886 | FLII       | 0.573875780453258 | 1 |
| COPD-CHD ENSG00000206557 | 3  | 154  | 25  | 4E+05 | 0.021877 | TRIM71     | 0.573875780453258 | 1 |

|          |                 |    |      |    |       |          |              |                   |   |
|----------|-----------------|----|------|----|-------|----------|--------------|-------------------|---|
| COPD-CHD | ENSG00000171060 | 8  | 36   | 12 | 4E+05 | 0.021809 | C8orf74      | 0.573641847795164 | 1 |
| COPD-CHD | ENSG00000176593 | 19 | 38   | 6  | 4E+05 | 0.021709 | CTD-2368P220 | 0.571824955840456 | 1 |
| COPD-CHD | ENSG00000182986 | 19 | 140  | 17 | 4E+05 | 0.0217   | ZNF320       | 0.571824955840456 | 1 |
| COPD-CHD | ENSG00000002745 | 7  | 35   | 7  | 4E+05 | 0.021596 | WNT16        | 0.570473765714286 | 1 |
| COPD-CHD | ENSG00000174136 | 5  | 63   | 8  | 4E+05 | 0.021519 | RGMB         | 0.569252974248927 | 1 |
| COPD-CHD | ENSG00000157353 | 16 | 21   | 10 | 4E+05 | 0.021381 | FUK          | 0.566412709169054 | 1 |
| COPD-CHD | ENSG00000089248 | 12 | 11   | 4  | 4E+05 | 0.021366 | ERP29        | 0.566412709169054 | 1 |
| COPD-CHD | ENSG00000015532 | 17 | 33   | 5  | 4E+05 | 0.021289 | XYLT2        | 0.565596119252874 | 1 |
| COPD-CHD | ENSG00000068137 | 17 | 7    | 3  | 4E+05 | 0.02119  | PLEKHH3      | 0.563775956834532 | 1 |
| COPD-CHD | ENSG00000167645 | 19 | 33   | 8  | 4E+05 | 0.021181 | YIF1B        | 0.563775956834532 | 1 |
| COPD-CHD | ENSG00000142453 | 19 | 77   | 9  | 4E+05 | 0.021166 | CARM1        | 0.563775956834532 | 1 |
| COPD-CHD | ENSG00000115652 | 2  | 181  | 20 | 4E+05 | 0.021101 | UXS1         | 0.563775956834532 | 1 |
| COPD-CHD | ENSG00000243156 | 22 | 920  | 58 | 4E+05 | 0.021029 | MICAL3       | 0.562731170767004 | 1 |
| COPD-CHD | ENSG00000164270 | 5  | 511  | 25 | 4E+05 | 0.020985 | HTR4         | 0.562367586956522 | 1 |
| COPD-CHD | ENSG00000119714 | 14 | 69   | 7  | 4E+05 | 0.02094  | GPR68        | 0.56197611030479  | 1 |
| COPD-CHD | ENSG00000266258 | 18 | 56   | 11 | 4E+05 | 0.020905 | RP11-41O4.1  | 0.561852260174419 | 1 |
| COPD-CHD | ENSG00000236699 | 4  | 398  | 31 | 4E+05 | 0.020881 | ARHGEF38     | 0.561852260174419 | 1 |
| COPD-CHD | ENSG00000214367 | 4  | 34   | 5  | 4E+05 | 0.020764 | HAUS3        | 0.559689685131195 | 1 |
| COPD-CHD | ENSG00000108591 | 17 | 34   | 5  | 4E+05 | 0.020751 | DRG2         | 0.559689685131195 | 1 |
| COPD-CHD | ENSG00000164116 | 4  | 185  | 26 | 4E+05 | 0.020522 | GUCY1A3      | 0.554784067251462 | 1 |
| COPD-CHD | ENSG00000164039 | 4  | 47   | 6  | 4E+05 | 0.020381 | BDH2         | 0.551779020497804 | 1 |
| COPD-CHD | ENSG00000147316 | 8  | 1205 | 75 | 4E+05 | 0.020361 | MCPH1        | 0.551779020497804 | 1 |
| COPD-CHD | ENSG00000134242 | 1  | 96   | 13 | 4E+05 | 0.020278 | PTPN22       | 0.550602787077827 | 1 |
| COPD-CHD | ENSG00000143466 | 1  | 80   | 18 | 4E+05 | 0.020259 | IKBKE        | 0.550602787077827 | 1 |
| COPD-CHD | ENSG00000184164 | 22 | 77   | 4  | 4E+05 | 0.020242 | CRELD2       | 0.550602787077827 | 1 |
| COPD-CHD | ENSG00000186625 | 6  | 107  | 4  | 4E+05 | 0.020102 | KATNA1       | 0.54823905899705  | 1 |
| COPD-CHD | ENSG00000135148 | 12 | 23   | 5  | 4E+05 | 0.020078 | TRAFD1       | 0.54823905899705  | 1 |
| COPD-CHD | ENSG00000177275 | 1  | 1    | 1  | 4E+05 | 0.020054 | OR2AJ1       | 0.54823905899705  | 1 |
| COPD-CHD | ENSG00000087301 | 14 | 293  | 15 | 4E+05 | 0.020005 | TXNDC16      | 0.548018451851852 | 1 |
| COPD-CHD | ENSG00000176087 | 5  | 6    | 3  | 4E+05 | 0.019936 | SLC35A4      | 0.546938540059347 | 1 |
| COPD-CHD | ENSG00000167531 | 12 | 3    | 2  | 4E+05 | 0.019877 | LALBA        | 0.54613017384844  | 1 |
| COPD-CHD | ENSG00000176953 | 16 | 18   | 5  | 4E+05 | 0.019854 | NFATC2IP     | 0.54613017384844  | 1 |
| COPD-CHD | ENSG00000108557 | 17 | 174  | 22 | 4E+05 | 0.019818 | RAI1         | 0.54613017384844  | 1 |

|          |                 |    |      |    |       |          |             |                   |   |
|----------|-----------------|----|------|----|-------|----------|-------------|-------------------|---|
| COPD-CHD | ENSG00000170683 | 11 | 1    | 1  | 4E+05 | 0.019766 | OR10A3      | 0.545512098507463 | 1 |
| COPD-CHD | ENSG00000144730 | 3  | 203  | 21 | 4E+05 | 0.019741 | IL17RD      | 0.545512098507463 | 1 |
| COPD-CHD | ENSG00000111231 | 12 | 37   | 7  | 4E+05 | 0.019695 | GPN3        | 0.54518000748503  | 1 |
| COPD-CHD | ENSG00000163596 | 2  | 190  | 14 | 4E+05 | 0.019693 | ICA1L       | 0.54518000748503  | 1 |
| COPD-CHD | ENSG00000154479 | 2  | 189  | 10 | 4E+05 | 0.019675 | CCDC173     | 0.54518000748503  | 1 |
| COPD-CHD | ENSG00000112200 | 6  | 98   | 8  | 4E+05 | 0.019669 | ZNF451      | 0.54518000748503  | 1 |
| COPD-CHD | ENSG00000160712 | 1  | 146  | 14 | 4E+05 | 0.019658 | IL6R        | 0.54518000748503  | 1 |
| COPD-CHD | ENSG00000138443 | 2  | 181  | 24 | 4E+05 | 0.019634 | ABI2        | 0.54518000748503  | 1 |
| COPD-CHD | ENSG00000115977 | 2  | 254  | 16 | 4E+05 | 0.019611 | AAK1        | 0.54518000748503  | 1 |
| COPD-CHD | ENSG00000149273 | 11 | 35   | 8  | 4E+05 | 0.01959  | RPS3        | 0.54518000748503  | 1 |
| COPD-CHD | ENSG00000159263 | 21 | 139  | 33 | 4E+05 | 0.019554 | SIM2        | 0.54518000748503  | 1 |
| COPD-CHD | ENSG00000105388 | 19 | 41   | 8  | 4E+05 | 0.019473 | CEACAM5     | 0.54518000748503  | 1 |
| COPD-CHD | ENSG00000183638 | 8  | 314  | 40 | 4E+05 | 0.019424 | RP1L1       | 0.54518000748503  | 1 |
| COPD-CHD | ENSG00000188352 | 9  | 892  | 36 | 4E+05 | 0.01942  | FOCAD       | 0.54518000748503  | 1 |
| COPD-CHD | ENSG00000157429 | 16 | 166  | 22 | 4E+05 | 0.019417 | ZNF19       | 0.54518000748503  | 1 |
| COPD-CHD | ENSG00000267748 | 19 | 41   | 8  | 4E+05 | 0.019413 | CTB-102L5.4 | 0.54518000748503  | 1 |
| COPD-CHD | ENSG00000117877 | 19 | 20   | 6  | 4E+05 | 0.019352 | CD3EAP      | 0.54518000748503  | 1 |
| COPD-CHD | ENSG00000188938 | 9  | 21   | 6  | 4E+05 | 0.019349 | FAM120AOS   | 0.54518000748503  | 1 |
| COPD-CHD | ENSG00000130940 | 1  | 379  | 64 | 4E+05 | 0.019297 | CASZ1       | 0.54518000748503  | 1 |
| COPD-CHD | ENSG00000146409 | 6  | 97   | 10 | 4E+05 | 0.019283 | SLC18B1     | 0.54518000748503  | 1 |
| COPD-CHD | ENSG00000241852 | 8  | 8    | 2  | 4E+05 | 0.01923  | C8orf58     | 0.54518000748503  | 1 |
| COPD-CHD | ENSG00000183431 | 1  | 89   | 10 | 4E+05 | 0.019202 | SF3A3       | 0.54518000748503  | 1 |
| COPD-CHD | ENSG00000146049 | 6  | 2    | 1  | 4E+05 | 0.019177 | KAAG1       | 0.54518000748503  | 1 |
| COPD-CHD | ENSG00000124749 | 6  | 1372 | 49 | 4E+05 | 0.019143 | COL21A1     | 0.54518000748503  | 1 |
| COPD-CHD | ENSG00000115970 | 2  | 1034 | 31 | 4E+05 | 0.01907  | THADA       | 0.54518000748503  | 1 |
| COPD-CHD | ENSG00000268163 | 19 | 144  | 13 | 4E+05 | 0.019056 | AC004076.9  | 0.54518000748503  | 1 |
| COPD-CHD | ENSG00000118094 | 11 | 44   | 4  | 4E+05 | 0.019    | TREH        | 0.54518000748503  | 1 |
| COPD-CHD | ENSG00000139734 | 13 | 1126 | 29 | 4E+05 | 0.018965 | DIAPH3      | 0.54518000748503  | 1 |
| COPD-CHD | ENSG00000204138 | 1  | 379  | 9  | 4E+05 | 0.018743 | PHACTR4     | 0.53983927258567  | 1 |
| COPD-CHD | ENSG00000130758 | 19 | 32   | 7  | 4E+05 | 0.0187   | MAP3K10     | 0.539441029641186 | 1 |
| COPD-CHD | ENSG00000146555 | 7  | 3441 | 96 | 4E+05 | 0.018692 | SDK1        | 0.539441029641186 | 1 |
| COPD-CHD | ENSG00000132781 | 1  | 14   | 6  | 4E+05 | 0.018658 | MUTYH       | 0.539441029641186 | 1 |
| COPD-CHD | ENSG00000186367 | 5  | 58   | 9  | 4E+05 | 0.018657 | KIAA1024L   | 0.539441029641186 | 1 |

|          |                 |    |     |    |       |          |              |                   |   |
|----------|-----------------|----|-----|----|-------|----------|--------------|-------------------|---|
| COPD-CHD | ENSG00000163394 | 4  | 24  | 5  | 4E+05 | 0.018565 | CCKAR        | 0.538909599686028 | 1 |
| COPD-CHD | ENSG00000176994 | 17 | 33  | 5  | 4E+05 | 0.018492 | SMCR8        | 0.537634547169811 | 1 |
| COPD-CHD | ENSG00000177191 | 19 | 6   | 2  | 4E+05 | 0.018488 | B3GNT8       | 0.537634547169811 | 1 |
| COPD-CHD | ENSG00000129691 | 8  | 35  | 12 | 4E+05 | 0.018479 | ASH2L        | 0.537634547169811 | 1 |
| COPD-CHD | ENSG00000165689 | 9  | 50  | 9  | 4E+05 | 0.018471 | SDCCAG3      | 0.537634547169811 | 1 |
| COPD-CHD | ENSG00000151012 | 4  | 196 | 19 | 4E+05 | 0.018406 | SLC7A11      | 0.537634547169811 | 1 |
| COPD-CHD | ENSG00000134684 | 1  | 75  | 10 | 4E+05 | 0.018396 | YARS         | 0.537634547169811 | 1 |
| COPD-CHD | ENSG00000139218 | 12 | 78  | 11 | 4E+05 | 0.018353 | SCAF11       | 0.537634547169811 | 1 |
| COPD-CHD | ENSG00000235608 | 4  | 4   | 2  | 4E+05 | 0.01833  | NKX1-1       | 0.537634547169811 | 1 |
| COPD-CHD | ENSG00000184571 | 22 | 188 | 20 | 4E+05 | 0.018237 | PIWIL3       | 0.536975106687898 | 1 |
| COPD-CHD | ENSG00000214530 | 11 | 79  | 10 | 4E+05 | 0.01821  | STARD10      | 0.536975106687898 | 1 |
| COPD-CHD | ENSG00000138231 | 3  | 21  | 2  | 4E+05 | 0.018199 | DBR1         | 0.536975106687898 | 1 |
| COPD-CHD | ENSG00000167644 | 19 | 5   | 2  | 4E+05 | 0.018175 | C19orf33     | 0.536975106687898 | 1 |
| COPD-CHD | ENSG00000149761 | 11 | 7   | 3  | 4E+05 | 0.018142 | NUDT22       | 0.536975106687898 | 1 |
| COPD-CHD | ENSG00000182179 | 3  | 6   | 2  | 4E+05 | 0.018139 | UBA7         | 0.536975106687898 | 1 |
| COPD-CHD | ENSG00000149131 | 11 | 36  | 4  | 4E+05 | 0.018099 | SERPING1     | 0.536975106687898 | 1 |
| COPD-CHD | ENSG00000182261 | 11 | 20  | 6  | 4E+05 | 0.018049 | NLRP10       | 0.536975106687898 | 1 |
| COPD-CHD | ENSG00000197386 | 4  | 355 | 19 | 4E+05 | 0.018021 | HTT          | 0.536975106687898 | 1 |
| COPD-CHD | ENSG00000146250 | 6  | 31  | 4  | 4E+05 | 0.017977 | PRSS35       | 0.536975106687898 | 1 |
| COPD-CHD | ENSG00000108423 | 17 | 60  | 9  | 4E+05 | 0.017938 | TUBD1        | 0.536717731391586 | 1 |
| COPD-CHD | ENSG00000129167 | 11 | 43  | 5  | 4E+05 | 0.017926 | TPH1         | 0.536717731391586 | 1 |
| COPD-CHD | ENSG00000180855 | 19 | 91  | 6  | 4E+05 | 0.017738 | ZNF443       | 0.53245675        | 1 |
| COPD-CHD | ENSG00000131626 | 11 | 230 | 8  | 4E+05 | 0.017679 | PPFIA1       | 0.5315486         | 1 |
| COPD-CHD | ENSG00000080546 | 6  | 209 | 9  | 4E+05 | 0.01761  | SESN1        | 0.530336335504886 | 1 |
| COPD-CHD | ENSG00000258512 | 14 | 8   | 1  | 4E+05 | 0.017549 | RP11-796G6.2 | 0.529361433931484 | 1 |
| COPD-CHD | ENSG00000119396 | 9  | 83  | 11 | 4E+05 | 0.017482 | RAB14        | 0.528202062091503 | 1 |
| COPD-CHD | ENSG00000148019 | 9  | 96  | 15 | 4E+05 | 0.01746  | CEP78        | 0.528202062091503 | 1 |
| COPD-CHD | ENSG00000140564 | 15 | 30  | 6  | 4E+05 | 0.017438 | FURIN        | 0.528202062091503 | 1 |
| COPD-CHD | ENSG00000130270 | 19 | 81  | 18 | 4E+05 | 0.017389 | ATP8B3       | 0.527980293924466 | 1 |
| COPD-CHD | ENSG00000181264 | 11 | 12  | 3  | 4E+05 | 0.01729  | TMEM136      | 0.525837813       | 1 |
| COPD-CHD | ENSG00000125755 | 19 | 183 | 12 | 4E+05 | 0.017284 | SYMPK        | 0.525837813       | 1 |
| COPD-CHD | ENSG00000204850 | 19 | 3   | 2  | 4E+05 | 0.017223 | AC011484.1   | 0.525528866336634 | 1 |
| COPD-CHD | ENSG00000214212 | 19 | 47  | 10 | 4E+05 | 0.017165 | C19orf38     | 0.524624818181818 | 1 |

|          |                 |    |     |    |       |          |              |                   |   |
|----------|-----------------|----|-----|----|-------|----------|--------------|-------------------|---|
| COPD-CHD | ENSG00000164162 | 4  | 125 | 18 | 4E+05 | 0.017126 | ANAPC10      | 0.524299447019868 | 1 |
| COPD-CHD | ENSG00000183559 | 10 | 7   | 2  | 4E+05 | 0.017091 | C10orf120    | 0.524095656716418 | 1 |
| COPD-CHD | ENSG00000088881 | 20 | 166 | 20 | 4E+05 | 0.017079 | EBF4         | 0.524095656716418 | 1 |
| COPD-CHD | ENSG00000173917 | 17 | 14  | 4  | 4E+05 | 0.017062 | HOXB2        | 0.524095656716418 | 1 |
| COPD-CHD | ENSG00000100197 | 22 | 14  | 5  | 4E+05 | 0.016994 | CYP2D6       | 0.523726756666667 | 1 |
| COPD-CHD | ENSG00000108861 | 17 | 30  | 4  | 4E+05 | 0.016975 | DUSP3        | 0.523726756666667 | 1 |
| COPD-CHD | ENSG00000165617 | 14 | 30  | 7  | 4E+05 | 0.016968 | DACT1        | 0.523726756666667 | 1 |
| COPD-CHD | ENSG00000033170 | 14 | 697 | 28 | 4E+05 | 0.016941 | FUT8         | 0.523726756666667 | 1 |
| COPD-CHD | ENSG00000125388 | 4  | 236 | 18 | 4E+05 | 0.016933 | GRK4         | 0.523726756666667 | 1 |
| COPD-CHD | ENSG00000166526 | 7  | 33  | 9  | 4E+05 | 0.016898 | ZNF3         | 0.523726756666667 | 1 |
| COPD-CHD | ENSG00000085721 | 16 | 76  | 12 | 4E+05 | 0.016872 | RRN3         | 0.523726756666667 | 1 |
| COPD-CHD | ENSG00000182511 | 15 | 36  | 7  | 4E+05 | 0.016846 | FES          | 0.523726756666667 | 1 |
| COPD-CHD | ENSG00000138780 | 4  | 326 | 12 | 4E+05 | 0.016818 | GSTCD        | 0.523726756666667 | 1 |
| COPD-CHD | ENSG00000150526 | 14 | 59  | 9  | 4E+05 | 0.016733 | MIA2         | 0.523536214890017 | 1 |
| COPD-CHD | ENSG00000132911 | 5  | 147 | 6  | 4E+05 | 0.016628 | NMUR2        | 0.521132793220339 | 1 |
| COPD-CHD | ENSG00000137962 | 1  | 197 | 27 | 4E+05 | 0.016627 | ARHGAP29     | 0.521132793220339 | 1 |
| COPD-CHD | ENSG00000136404 | 15 | 46  | 8  | 4E+05 | 0.016537 | TM6SF1       | 0.520043651360544 | 1 |
| COPD-CHD | ENSG00000213213 | 9  | 25  | 5  | 4E+05 | 0.016499 | CCDC183      | 0.519732553662692 | 1 |
| COPD-CHD | ENSG00000136457 | 17 | 8   | 3  | 4E+05 | 0.01649  | CHAD         | 0.519732553662692 | 1 |
| COPD-CHD | ENSG00000174233 | 12 | 38  | 4  | 4E+05 | 0.016442 | ADCY6        | 0.51970772991453  | 1 |
| COPD-CHD | ENSG00000138380 | 2  | 138 | 9  | 4E+05 | 0.016376 | CARF         | 0.518507904109589 | 1 |
| COPD-CHD | ENSG00000177455 | 16 | 6   | 3  | 4E+05 | 0.016328 | CD19         | 0.517874867924528 | 1 |
| COPD-CHD | ENSG00000141002 | 16 | 100 | 5  | 4E+05 | 0.016327 | TCF25        | 0.517874867924528 | 1 |
| COPD-CHD | ENSG00000138442 | 2  | 276 | 11 | 4E+05 | 0.016234 | WDR12        | 0.516665910499139 | 1 |
| COPD-CHD | ENSG00000118849 | 3  | 113 | 13 | 4E+05 | 0.016208 | RARRES1      | 0.516665910499139 | 1 |
| COPD-CHD | ENSG00000162374 | 1  | 180 | 28 | 4E+05 | 0.016202 | ELAVL4       | 0.516665910499139 | 1 |
| COPD-CHD | ENSG00000073711 | 3  | 282 | 19 | 4E+05 | 0.016198 | PPP2R3A      | 0.516665910499139 | 1 |
| COPD-CHD | ENSG00000170099 | 14 | 83  | 13 | 4E+05 | 0.016091 | SERPINA6     | 0.515664958405546 | 1 |
| COPD-CHD | ENSG00000140835 | 16 | 15  | 6  | 4E+05 | 0.016073 | CHST4        | 0.515664958405546 | 1 |
| COPD-CHD | ENSG00000171495 | 5  | 320 | 25 | 4E+05 | 0.015925 | MROH2B       | 0.512120304347826 | 1 |
| COPD-CHD | ENSG00000124177 | 20 | 469 | 25 | 4E+05 | 0.015898 | CHD6         | 0.512120304347826 | 1 |
| COPD-CHD | ENSG00000165816 | 10 | 127 | 19 | 4E+05 | 0.015867 | VWA2         | 0.512036120418848 | 1 |
| COPD-CHD | ENSG00000258875 | 14 | 31  | 4  | 4E+05 | 0.015804 | CTD-2547L240 | 0.510894692307692 | 1 |

|          |                 |    |     |    |       |          |              |                   |   |
|----------|-----------------|----|-----|----|-------|----------|--------------|-------------------|---|
| COPD-CHD | ENSG00000084112 | 12 | 105 | 18 | 4E+05 | 0.015683 | SSH1         | 0.507871021015762 | 1 |
| COPD-CHD | ENSG00000166503 | 15 | 140 | 10 | 4E+05 | 0.01565  | HDGFRP3      | 0.50769149122807  | 1 |
| COPD-CHD | ENSG00000183072 | 5  | 4   | 2  | 4E+05 | 0.01563  | NKX2-5       | 0.50769149122807  | 1 |
| COPD-CHD | ENSG00000162526 | 1  | 4   | 2  | 4E+05 | 0.015575 | TSSK3        | 0.507037544014085 | 1 |
| COPD-CHD | ENSG00000138785 | 4  | 482 | 14 | 4E+05 | 0.01557  | INTS12       | 0.507037544014085 | 1 |
| COPD-CHD | ENSG00000268361 | 19 | 86  | 14 | 4E+05 | 0.01553  | L34079.2     | 0.507037544014085 | 1 |
| COPD-CHD | ENSG00000068784 | 2  | 641 | 26 | 4E+05 | 0.015494 | SRBD1        | 0.507037544014085 | 1 |
| COPD-CHD | ENSG00000166529 | 7  | 18  | 3  | 4E+05 | 0.015473 | ZSCAN21      | 0.507037544014085 | 1 |
| COPD-CHD | ENSG00000108798 | 17 | 34  | 8  | 4E+05 | 0.015451 | ABI3         | 0.507037544014085 | 1 |
| COPD-CHD | ENSG00000099974 | 22 | 10  | 3  | 4E+05 | 0.015438 | DDTL         | 0.507037544014085 | 1 |
| COPD-CHD | ENSG00000183196 | 16 | 36  | 11 | 4E+05 | 0.015436 | CHST6        | 0.507037544014085 | 1 |
| COPD-CHD | ENSG00000173391 | 12 | 48  | 6  | 4E+05 | 0.015362 | OLR1         | 0.507037544014085 | 1 |
| COPD-CHD | ENSG00000160716 | 1  | 20  | 7  | 4E+05 | 0.015301 | CHRN2        | 0.506137372093023 | 1 |
| COPD-CHD | ENSG00000174579 | 3  | 50  | 11 | 4E+05 | 0.015291 | MSL2         | 0.506137372093023 | 1 |
| COPD-CHD | ENSG00000099977 | 22 | 3   | 1  | 4E+05 | 0.015249 | DDT          | 0.506137372093023 | 1 |
| COPD-CHD | ENSG00000124194 | 20 | 76  | 9  | 4E+05 | 0.015245 | GDAP1L1      | 0.506137372093023 | 1 |
| COPD-CHD | ENSG00000125347 | 5  | 41  | 2  | 4E+05 | 0.015212 | IRF1         | 0.506137372093023 | 1 |
| COPD-CHD | ENSG00000120696 | 13 | 4   | 1  | 4E+05 | 0.015179 | KBTBD7       | 0.506137372093023 | 1 |
| COPD-CHD | ENSG00000152518 | 2  | 10  | 4  | 4E+05 | 0.015155 | ZFP36L2      | 0.506137372093023 | 1 |
| COPD-CHD | ENSG00000182022 | 10 | 188 | 27 | 4E+05 | 0.01513  | CHST15       | 0.506137372093023 | 1 |
| COPD-CHD | ENSG00000255692 | 12 | 1   | 1  | 4E+05 | 0.015119 | RP1-127H14.3 | 0.506137372093023 | 1 |
| COPD-CHD | ENSG00000170500 | 2  | 180 | 10 | 4E+05 | 0.015105 | LONRF2       | 0.506137372093023 | 1 |
| COPD-CHD | ENSG00000185650 | 14 | 19  | 4  | 4E+05 | 0.015076 | ZFP36L1      | 0.506137372093023 | 1 |
| COPD-CHD | ENSG00000101049 | 20 | 75  | 17 | 4E+05 | 0.015053 | SGK2         | 0.506137372093023 | 1 |
| COPD-CHD | ENSG00000115705 | 2  | 614 | 37 | 4E+05 | 0.015044 | TPO          | 0.506137372093023 | 1 |
| COPD-CHD | ENSG00000186998 | 22 | 178 | 27 | 4E+05 | 0.015    | EMID1        | 0.506137372093023 | 1 |
| COPD-CHD | ENSG00000138778 | 4  | 172 | 11 | 4E+05 | 0.014949 | CENPE        | 0.506137372093023 | 1 |
| COPD-CHD | ENSG00000112539 | 6  | 79  | 10 | 4E+05 | 0.014827 | C6orf118     | 0.503981722426471 | 1 |
| COPD-CHD | ENSG00000166159 | 12 | 59  | 18 | 4E+05 | 0.014806 | LRTM2        | 0.503981722426471 | 1 |
| COPD-CHD | ENSG00000269755 | 19 | 214 | 11 | 4E+05 | 0.014805 | CTD-3105H1   | 0.503981722426471 | 1 |
| COPD-CHD | ENSG00000101236 | 20 | 204 | 15 | 4E+05 | 0.014714 | RNF24        | 0.502914184842884 | 1 |
| COPD-CHD | ENSG00000187581 | 14 | 8   | 3  | 4E+05 | 0.014601 | COX8C        | 0.499976094444445 | 1 |
| COPD-CHD | ENSG00000163825 | 3  | 12  | 3  | 4E+05 | 0.014535 | RTP3         | 0.498639489795918 | 1 |

|          |                 |    |      |    |       |          |            |                   |   |
|----------|-----------------|----|------|----|-------|----------|------------|-------------------|---|
| COPD-CHD | ENSG00000205971 | 7  | 4    | 2  | 4E+05 | 0.01449  | AC074389.6 | 0.49801968401487  | 1 |
| COPD-CHD | ENSG00000087884 | 11 | 176  | 14 | 4E+05 | 0.014467 | AAMDC      | 0.49801968401487  | 1 |
| COPD-CHD | ENSG00000125743 | 19 | 10   | 4  | 4E+05 | 0.014446 | SNRPD2     | 0.49801968401487  | 1 |
| COPD-CHD | ENSG00000130733 | 19 | 5    | 3  | 4E+05 | 0.014325 | YIPF2      | 0.495109485981308 | 1 |
| COPD-CHD | ENSG00000011114 | 14 | 271  | 15 | 4E+05 | 0.01428  | BTBD7      | 0.494478426966292 | 1 |
| COPD-CHD | ENSG00000176974 | 17 | 97   | 10 | 4E+05 | 0.014139 | SHMT1      | 0.490514538461539 | 1 |
| COPD-CHD | ENSG00000088325 | 20 | 98   | 9  | 4E+05 | 0.014121 | TPX2       | 0.490514538461539 | 1 |
| COPD-CHD | ENSG00000143498 | 1  | 76   | 9  | 4E+05 | 0.014097 | TAF1A      | 0.490514538461539 | 1 |
| COPD-CHD | ENSG00000128242 | 22 | 50   | 18 | 4E+05 | 0.014095 | GAL3ST1    | 0.490514538461539 | 1 |
| COPD-CHD | ENSG00000177427 | 17 | 11   | 4  | 4E+05 | 0.014075 | MIEF2      | 0.490514538461539 | 1 |
| COPD-CHD | ENSG00000177302 | 17 | 86   | 8  | 4E+05 | 0.014062 | TOP3A      | 0.490514538461539 | 1 |
| COPD-CHD | ENSG00000147465 | 8  | 6    | 3  | 4E+05 | 0.014026 | STAR       | 0.490514538461539 | 1 |
| COPD-CHD | ENSG00000130640 | 10 | 83   | 13 | 4E+05 | 0.014013 | TUBGCP2    | 0.490514538461539 | 1 |
| COPD-CHD | ENSG00000108306 | 17 | 285  | 9  | 4E+05 | 0.014012 | FBXL20     | 0.490514538461539 | 1 |
| COPD-CHD | ENSG00000101199 | 20 | 42   | 4  | 4E+05 | 0.013999 | ARFGAP1    | 0.490514538461539 | 1 |
| COPD-CHD | ENSG00000257704 | 19 | 2    | 1  | 4E+05 | 0.013958 | PRR24      | 0.490514538461539 | 1 |
| COPD-CHD | ENSG00000128408 | 22 | 55   | 5  | 4E+05 | 0.013938 | RIBC2      | 0.490514538461539 | 1 |
| COPD-CHD | ENSG00000244624 | 21 | 1    | 1  | 4E+05 | 0.013912 | KRTAP20-1  | 0.490514538461539 | 1 |
| COPD-CHD | ENSG00000162630 | 1  | 9    | 3  | 4E+05 | 0.013866 | B3GALT2    | 0.490514538461539 | 1 |
| COPD-CHD | ENSG00000129351 | 19 | 47   | 5  | 4E+05 | 0.013782 | ILF3       | 0.490514538461539 | 1 |
| COPD-CHD | ENSG00000100142 | 22 | 80   | 8  | 4E+05 | 0.013772 | POLR2F     | 0.490514538461539 | 1 |
| COPD-CHD | ENSG00000111300 | 12 | 75   | 11 | 4E+05 | 0.01377  | NAA25      | 0.490514538461539 | 1 |
| COPD-CHD | ENSG00000113391 | 5  | 658  | 21 | 4E+05 | 0.013673 | FAM172A    | 0.489975664728682 | 1 |
| COPD-CHD | ENSG00000167202 | 15 | 242  | 23 | 4E+05 | 0.013649 | TBC1D2B    | 0.489975664728682 | 1 |
| COPD-CHD | ENSG00000114670 | 3  | 678  | 29 | 4E+05 | 0.013633 | NEK11      | 0.489975664728682 | 1 |
| COPD-CHD | ENSG00000186907 | 11 | 14   | 6  | 4E+05 | 0.013563 | RTN4RL2    | 0.488876087719298 | 1 |
| COPD-CHD | ENSG00000073060 | 12 | 333  | 49 | 4E+05 | 0.013492 | SCARB1     | 0.4872667421875   | 1 |
| COPD-CHD | ENSG00000115841 | 2  | 457  | 22 | 4E+05 | 0.01348  | RMDN2      | 0.4872667421875   | 1 |
| COPD-CHD | ENSG00000171044 | 8  | 1032 | 29 | 4E+05 | 0.013368 | XKR6       | 0.484681741176471 | 1 |
| COPD-CHD | ENSG00000104228 | 8  | 40   | 6  | 4E+05 | 0.013356 | TRIM35     | 0.484681741176471 | 1 |
| COPD-CHD | ENSG00000196826 | 19 | 267  | 19 | 4E+05 | 0.013336 | ZNF709     | 0.484681741176471 | 1 |
| COPD-CHD | ENSG00000100003 | 22 | 70   | 13 | 4E+05 | 0.01331  | SEC14L2    | 0.484681741176471 | 1 |
| COPD-CHD | ENSG00000197128 | 19 | 41   | 4  | 4E+05 | 0.013303 | ZNF772     | 0.484681741176471 | 1 |

|          |                 |    |      |     |       |          |             |                   |   |
|----------|-----------------|----|------|-----|-------|----------|-------------|-------------------|---|
| COPD-CHD | ENSG00000130643 | 10 | 22   | 7   | 4E+05 | 0.013285 | CALY        | 0.484681741176471 | 1 |
| COPD-CHD | ENSG00000196914 | 11 | 253  | 12  | 4E+05 | 0.013116 | ARHGEF12    | 0.481206261904762 | 1 |
| COPD-CHD | ENSG00000177374 | 17 | 9    | 4   | 4E+05 | 0.013029 | HIC1        | 0.478964689860835 | 1 |
| COPD-CHD | ENSG00000178093 | 19 | 5    | 2   | 4E+05 | 0.013008 | TSSK6       | 0.478964689860835 | 1 |
| COPD-CHD | ENSG00000059377 | 7  | 527  | 66  | 4E+05 | 0.013002 | TBXAS1      | 0.478964689860835 | 1 |
| COPD-CHD | ENSG00000113212 | 5  | 18   | 5   | 4E+05 | 0.012996 | PCDHB7      | 0.478964689860835 | 1 |
| COPD-CHD | ENSG00000125686 | 17 | 73   | 6   | 4E+05 | 0.012972 | MED1        | 0.478964689860835 | 1 |
| COPD-CHD | ENSG00000116329 | 1  | 160  | 18  | 4E+05 | 0.012919 | OPRD1       | 0.478964689860835 | 1 |
| COPD-CHD | ENSG00000156052 | 9  | 540  | 23  | 4E+05 | 0.012919 | GNAQ        | 0.478964689860835 | 1 |
| COPD-CHD | ENSG00000131148 | 16 | 87   | 8   | 4E+05 | 0.012866 | EMC8        | 0.478964689860835 | 1 |
| COPD-CHD | ENSG00000162777 | 1  | 44   | 14  | 4E+05 | 0.012836 | DENND2D     | 0.478964689860835 | 1 |
| COPD-CHD | ENSG00000185019 | 20 | 130  | 15  | 4E+05 | 0.01282  | UBOX5       | 0.478964689860835 | 1 |
| COPD-CHD | ENSG00000144152 | 2  | 128  | 18  | 4E+05 | 0.012754 | FBLN7       | 0.478365545638945 | 1 |
| COPD-CHD | ENSG0000006042  | 17 | 54   | 7   | 4E+05 | 0.012671 | TMEM98      | 0.476218416666667 | 1 |
| COPD-CHD | ENSG00000172409 | 11 | 14   | 3   | 4E+05 | 0.012611 | CLP1        | 0.474928718940937 | 1 |
| COPD-CHD | ENSG00000111271 | 12 | 65   | 5   | 4E+05 | 0.012606 | ACAD10      | 0.474928718940937 | 1 |
| COPD-CHD | ENSG00000249590 | 22 | 45   | 11  | 4E+05 | 0.012461 | RP4-539M6.1 | 0.471199081799591 | 1 |
| COPD-CHD | ENSG00000139718 | 12 | 36   | 5   | 4E+05 | 0.012436 | SETD1B      | 0.471199081799591 | 1 |
| COPD-CHD | ENSG00000132297 | 8  | 202  | 29  | 4E+05 | 0.01241  | HHLA1       | 0.471197761806982 | 1 |
| COPD-CHD | ENSG00000214413 | 10 | 42   | 10  | 4E+05 | 0.012357 | BBIP1       | 0.470150796296296 | 1 |
| COPD-CHD | ENSG00000116604 | 1  | 65   | 9   | 4E+05 | 0.01235  | MEF2D       | 0.470150796296296 | 1 |
| COPD-CHD | ENSG00000146094 | 5  | 18   | 6   | 4E+05 | 0.012296 | DOK3        | 0.469763090909091 | 1 |
| COPD-CHD | ENSG00000081019 | 1  | 64   | 12  | 4E+05 | 0.01229  | RSBN1       | 0.469763090909091 | 1 |
| COPD-CHD | ENSG00000101017 | 20 | 26   | 9   | 4E+05 | 0.012245 | CD40        | 0.469755798755187 | 1 |
| COPD-CHD | ENSG00000151651 | 10 | 48   | 5   | 4E+05 | 0.012227 | ADAM8       | 0.469755798755187 | 1 |
| COPD-CHD | ENSG00000204842 | 12 | 108  | 8   | 4E+05 | 0.012196 | ATXN2       | 0.469755798755187 | 1 |
| COPD-CHD | ENSG00000139209 | 12 | 207  | 30  | 4E+05 | 0.012185 | SLC38A4     | 0.469755798755187 | 1 |
| COPD-CHD | ENSG00000184304 | 14 | 1413 | 104 | 4E+05 | 0.01207  | PRKD1       | 0.466917092050209 | 1 |
| COPD-CHD | ENSG00000078804 | 20 | 10   | 3   | 4E+05 | 0.012049 | TP53INP2    | 0.466917092050209 | 1 |
| COPD-CHD | ENSG00000169609 | 15 | 53   | 9   | 4E+05 | 0.012047 | C15orf40    | 0.466917092050209 | 1 |
| COPD-CHD | ENSG00000136695 | 2  | 46   | 3   | 4E+05 | 0.012015 | IL36RN      | 0.466917092050209 | 1 |
| COPD-CHD | ENSG00000100296 | 22 | 119  | 10  | 4E+05 | 0.01201  | THOC5       | 0.466917092050209 | 1 |
| COPD-CHD | ENSG00000107014 | 9  | 8    | 2   | 4E+05 | 0.012005 | RLN2        | 0.466917092050209 | 1 |

|          |                 |    |     |    |       |          |            |                   |   |
|----------|-----------------|----|-----|----|-------|----------|------------|-------------------|---|
| COPD-CHD | ENSG0000081026  | 1  | 569 | 30 | 4E+05 | 0.011925 | MAGI3      | 0.466917092050209 | 1 |
| COPD-CHD | ENSG00000162775 | 1  | 11  | 4  | 4E+05 | 0.011903 | RBM15      | 0.466917092050209 | 1 |
| COPD-CHD | ENSG00000204140 | 6  | 37  | 6  | 4E+05 | 0.011871 | CLPSL1     | 0.466917092050209 | 1 |
| COPD-CHD | ENSG00000173621 | 11 | 1   | 1  | 4E+05 | 0.0118   | LRFN4      | 0.465231982942431 | 1 |
| COPD-CHD | ENSG00000133114 | 13 | 114 | 15 | 4E+05 | 0.011753 | GPALPP1    | 0.464369066239316 | 1 |
| COPD-CHD | ENSG00000157500 | 3  | 69  | 9  | 4E+05 | 0.011746 | APPL1      | 0.464369066239316 | 1 |
| COPD-CHD | ENSG00000215251 | 20 | 33  | 7  | 4E+05 | 0.011721 | FASTKD5    | 0.464369066239316 | 1 |
| COPD-CHD | ENSG00000240682 | 3  | 34  | 8  | 4E+05 | 0.011592 | ISY1       | 0.460962735483871 | 1 |
| COPD-CHD | ENSG00000173641 | 1  | 47  | 6  | 4E+05 | 0.011557 | HSPB7      | 0.460561394396552 | 1 |
| COPD-CHD | ENSG00000099338 | 19 | 119 | 15 | 4E+05 | 0.011554 | CATSPERG   | 0.460561394396552 | 1 |
| COPD-CHD | ENSG00000140463 | 15 | 99  | 14 | 4E+05 | 0.011546 | BBS4       | 0.460561394396552 | 1 |
| COPD-CHD | ENSG00000162241 | 11 | 11  | 4  | 4E+05 | 0.01152  | SLC25A45   | 0.460561394396552 | 1 |
| COPD-CHD | ENSG00000108465 | 17 | 38  | 7  | 4E+05 | 0.0115   | CDK5RAP3   | 0.460561394396552 | 1 |
| COPD-CHD | ENSG00000135503 | 12 | 70  | 10 | 4E+05 | 0.01148  | ACVR1B     | 0.460561394396552 | 1 |
| COPD-CHD | ENSG00000100207 | 22 | 376 | 30 | 4E+05 | 0.01132  | TCF20      | 0.457026462882096 | 1 |
| COPD-CHD | ENSG00000116514 | 1  | 55  | 7  | 4E+05 | 0.011298 | RNF19B     | 0.457026462882096 | 1 |
| COPD-CHD | ENSG00000151617 | 4  | 112 | 11 | 4E+05 | 0.011261 | EDNRA      | 0.456638489035088 | 1 |
| COPD-CHD | ENSG00000269095 | 19 | 63  | 14 | 4E+05 | 0.011235 | AC010646.3 | 0.456585461538462 | 1 |
| COPD-CHD | ENSG00000164253 | 5  | 726 | 35 | 4E+05 | 0.011171 | WDR41      | 0.454984495594714 | 1 |
| COPD-CHD | ENSG00000163666 | 3  | 39  | 7  | 4E+05 | 0.011153 | HESX1      | 0.454984495594714 | 1 |
| COPD-CHD | ENSG00000116670 | 1  | 55  | 10 | 4E+05 | 0.011095 | MAD2L2     | 0.453888595132743 | 1 |
| COPD-CHD | ENSG00000134809 | 11 | 3   | 1  | 4E+05 | 0.011    | TIMM10     | 0.451             | 1 |
| COPD-CHD | ENSG00000173868 | 17 | 17  | 5  | 4E+05 | 0.010991 | PHOSPHO1   | 0.451             | 1 |
| COPD-CHD | ENSG00000196600 | 11 | 223 | 12 | 4E+05 | 0.010823 | SLC22A25   | 0.445719583518931 | 1 |
| COPD-CHD | ENSG00000166997 | 7  | 12  | 4  | 4E+05 | 0.010815 | CNPY4      | 0.445719583518931 | 1 |
| COPD-CHD | ENSG00000177548 | 16 | 33  | 7  | 4E+05 | 0.010758 | RABEP2     | 0.445025006711409 | 1 |
| COPD-CHD | ENSG00000131435 | 5  | 43  | 7  | 4E+05 | 0.010686 | PDLIM4     | 0.443037726457399 | 1 |
| COPD-CHD | ENSG00000197256 | 19 | 121 | 12 | 4E+05 | 0.01059  | KANK2      | 0.440044247191011 | 1 |
| COPD-CHD | ENSG00000175393 | 11 | 6   | 2  | 4E+05 | 0.010589 | OR10A6     | 0.440044247191011 | 1 |
| COPD-CHD | ENSG00000176209 | 8  | 44  | 6  | 4E+05 | 0.010581 | SMIM19     | 0.440044247191011 | 1 |
| COPD-CHD | ENSG00000089234 | 12 | 29  | 5  | 4E+05 | 0.010574 | BRAP       | 0.440044247191011 | 1 |
| COPD-CHD | ENSG00000081692 | 1  | 13  | 5  | 4E+05 | 0.01054  | JMJD4      | 0.440044247191011 | 1 |
| COPD-CHD | ENSG00000168589 | 16 | 42  | 5  | 4E+05 | 0.01053  | DYNLRB2    | 0.440044247191011 | 1 |

|          |                 |    |     |    |       |          |              |                   |   |
|----------|-----------------|----|-----|----|-------|----------|--------------|-------------------|---|
| COPD-CHD | ENSG00000249222 | 22 | 3   | 1  | 4E+05 | 0.01052  | ATP5L2       | 0.440044247191011 | 1 |
| COPD-CHD | ENSG00000140368 | 15 | 101 | 17 | 4E+05 | 0.010499 | PSTPIP1      | 0.440044247191011 | 1 |
| COPD-CHD | ENSG00000186010 | 19 | 34  | 4  | 4E+05 | 0.010494 | NDUFA13      | 0.440044247191011 | 1 |
| COPD-CHD | ENSG00000186063 | 1  | 69  | 13 | 4E+05 | 0.010365 | AIDA         | 0.439585355504587 | 1 |
| COPD-CHD | ENSG00000126062 | 3  | 3   | 2  | 4E+05 | 0.010355 | TMEM115      | 0.439585355504587 | 1 |
| COPD-CHD | ENSG00000150938 | 2  | 489 | 45 | 4E+05 | 0.01035  | CRIM1        | 0.439585355504587 | 1 |
| COPD-CHD | ENSG00000143207 | 1  | 541 | 19 | 4E+05 | 0.010338 | RFWD2        | 0.439585355504587 | 1 |
| COPD-CHD | ENSG00000105255 | 19 | 57  | 12 | 4E+05 | 0.010317 | FSD1         | 0.439585355504587 | 1 |
| COPD-CHD | ENSG00000169599 | 2  | 98  | 6  | 4E+05 | 0.010119 | NFU1         | 0.43413092575406  | 1 |
| COPD-CHD | ENSG00000102996 | 16 | 32  | 7  | 4E+05 | 0.01008  | MMP15        | 0.433463441860465 | 1 |
| COPD-CHD | ENSG00000155792 | 8  | 729 | 27 | 4E+05 | 0.010073 | DEPTOR       | 0.433463441860465 | 1 |
| COPD-CHD | ENSG00000161544 | 17 | 39  | 5  | 4E+05 | 0.010056 | CYGB         | 0.433463441860465 | 1 |
| COPD-CHD | ENSG00000131400 | 19 | 13  | 3  | 4E+05 | 0.010045 | NAPSA        | 0.433463441860465 | 1 |
| COPD-CHD | ENSG00000242852 | 19 | 187 | 10 | 4E+05 | 0.010044 | ZNF709       | 0.433463441860465 | 1 |
| COPD-CHD | ENSG00000135049 | 9  | 294 | 23 | 4E+05 | 0.009925 | AGTPBP1      | 0.431819235294118 | 1 |
| COPD-CHD | ENSG00000167258 | 17 | 188 | 10 | 4E+05 | 0.00992  | CDK12        | 0.431819235294118 | 1 |
| COPD-CHD | ENSG00000214140 | 17 | 42  | 5  | 4E+05 | 0.009909 | PRCD         | 0.431819235294118 | 1 |
| COPD-CHD | ENSG00000258674 | 19 | 35  | 4  | 4E+05 | 0.009892 | CTC-260F20.1 | 0.431819235294118 | 1 |
| COPD-CHD | ENSG00000170677 | 18 | 135 | 19 | 4E+05 | 0.009793 | SOCS6        | 0.430111201187648 | 1 |
| COPD-CHD | ENSG00000162419 | 1  | 64  | 6  | 4E+05 | 0.009725 | GMEB1        | 0.428150299761905 | 1 |
| COPD-CHD | ENSG00000173757 | 17 | 74  | 8  | 4E+05 | 0.009716 | STAT5B       | 0.428150299761905 | 1 |
| COPD-CHD | ENSG00000250067 | 19 | 37  | 4  | 4E+05 | 0.009703 | YJEFN3       | 0.428150299761905 | 1 |
| COPD-CHD | ENSG00000139433 | 12 | 67  | 10 | 4E+05 | 0.009672 | GLTP         | 0.428150299761905 | 1 |
| COPD-CHD | ENSG00000184117 | 22 | 65  | 7  | 4E+05 | 0.009661 | NIPSNAP1     | 0.428150299761905 | 1 |
| COPD-CHD | ENSG00000179295 | 12 | 89  | 12 | 4E+05 | 0.009576 | PTPN11       | 0.426692078072289 | 1 |
| COPD-CHD | ENSG00000164062 | 3  | 7   | 2  | 4E+05 | 0.00956  | APEH         | 0.426692078072289 | 1 |
| COPD-CHD | ENSG00000138182 | 10 | 250 | 11 | 4E+05 | 0.00954  | KIF20B       | 0.426692078072289 | 1 |
| COPD-CHD | ENSG00000159322 | 15 | 70  | 10 | 4E+05 | 0.009539 | ADPGK        | 0.426692078072289 | 1 |
| COPD-CHD | ENSG00000255730 | 19 | 163 | 8  | 4E+05 | 0.009537 | CTC-435M10   | 0.426692078072289 | 1 |
| COPD-CHD | ENSG00000091592 | 17 | 510 | 17 | 4E+05 | 0.009518 | NLRP1        | 0.426692078072289 | 1 |
| COPD-CHD | ENSG00000134248 | 1  | 17  | 4  | 4E+05 | 0.009446 | LAMTOR5      | 0.426692078072289 | 1 |
| COPD-CHD | ENSG00000185974 | 13 | 43  | 6  | 4E+05 | 0.009424 | GRK1         | 0.426692078072289 | 1 |
| COPD-CHD | ENSG00000162755 | 1  | 4   | 2  | 4E+05 | 0.009397 | KLHDC9       | 0.426692078072289 | 1 |

|          |                 |    |      |    |       |          |            |                   |   |
|----------|-----------------|----|------|----|-------|----------|------------|-------------------|---|
| COPD-CHD | ENSG00000147905 | 9  | 280  | 16 | 4E+05 | 0.009389 | ZCCHC7     | 0.426692078072289 | 1 |
| COPD-CHD | ENSG00000172780 | 3  | 35   | 7  | 4E+05 | 0.009316 | RAB43      | 0.42535235382716  | 1 |
| COPD-CHD | ENSG00000134909 | 11 | 646  | 22 | 4E+05 | 0.009316 | ARHGAP32   | 0.42535235382716  | 1 |
| COPD-CHD | ENSG00000099337 | 19 | 27   | 6  | 4E+05 | 0.009295 | KCNK6      | 0.42535235382716  | 1 |
| COPD-CHD | ENSG00000196549 | 3  | 363  | 43 | 4E+05 | 0.009264 | MME        | 0.42535235382716  | 1 |
| COPD-CHD | ENSG00000198646 | 20 | 186  | 13 | 4E+05 | 0.009249 | NCOA6      | 0.42535235382716  | 1 |
| COPD-CHD | ENSG00000197093 | 7  | 12   | 3  | 4E+05 | 0.009204 | GAL3ST4    | 0.42535235382716  | 1 |
| COPD-CHD | ENSG00000100604 | 14 | 43   | 8  | 4E+05 | 0.009121 | CHGA       | 0.422679234586466 | 1 |
| COPD-CHD | ENSG00000112273 | 6  | 8    | 2  | 4E+05 | 0.009098 | HDGFL1     | 0.422679234586466 | 1 |
| COPD-CHD | ENSG00000117399 | 1  | 6    | 3  | 4E+05 | 0.009078 | CDC20      | 0.422679234586466 | 1 |
| COPD-CHD | ENSG00000261796 | 3  | 76   | 11 | 4E+05 | 0.009071 | ISY1-RAB43 | 0.422679234586466 | 1 |
| COPD-CHD | ENSG00000213047 | 1  | 345  | 17 | 4E+05 | 0.009064 | DENND1B    | 0.422679234586466 | 1 |
| COPD-CHD | ENSG00000102908 | 16 | 280  | 15 | 4E+05 | 0.009045 | NFAT5      | 0.422679234586466 | 1 |
| COPD-CHD | ENSG00000055211 | 6  | 19   | 4  | 4E+05 | 0.009038 | GINM1      | 0.422679234586466 | 1 |
| COPD-CHD | ENSG00000138399 | 2  | 119  | 19 | 4E+05 | 0.009008 | FASTKD1    | 0.422679234586466 | 1 |
| COPD-CHD | ENSG00000181698 | 11 | 3    | 2  | 4E+05 | 0.009001 | OR5T1      | 0.422679234586466 | 1 |
| COPD-CHD | ENSG00000197408 | 19 | 102  | 11 | 4E+05 | 0.008998 | CYP2B6     | 0.422679234586466 | 1 |
| COPD-CHD | ENSG00000138315 | 10 | 35   | 5  | 4E+05 | 0.008929 | OIT3       | 0.422679234586466 | 1 |
| COPD-CHD | ENSG00000154310 | 3  | 970  | 94 | 4E+05 | 0.00892  | TNIK       | 0.422679234586466 | 1 |
| COPD-CHD | ENSG00000177673 | 2  | 3    | 2  | 4E+05 | 0.008912 | C2orf57    | 0.422679234586466 | 1 |
| COPD-CHD | ENSG00000144362 | 2  | 12   | 3  | 4E+05 | 0.008911 | PHOSPHO2   | 0.422679234586466 | 1 |
| COPD-CHD | ENSG00000147889 | 9  | 29   | 7  | 4E+05 | 0.008891 | CDKN2A     | 0.422679234586466 | 1 |
| COPD-CHD | ENSG00000148834 | 10 | 61   | 12 | 4E+05 | 0.008889 | GSTO1      | 0.422679234586466 | 1 |
| COPD-CHD | ENSG00000168679 | 1  | 54   | 9  | 4E+05 | 0.008883 | SLC16A4    | 0.422679234586466 | 1 |
| COPD-CHD | ENSG00000198046 | 19 | 95   | 12 | 4E+05 | 0.008861 | ZNF667     | 0.422679234586466 | 1 |
| COPD-CHD | ENSG00000160844 | 7  | 132  | 13 | 4E+05 | 0.008855 | GATS       | 0.422679234586466 | 1 |
| COPD-CHD | ENSG00000105341 | 19 | 16   | 2  | 4E+05 | 0.008764 | ATP5SL     | 0.422679234586466 | 1 |
| COPD-CHD | ENSG00000163798 | 2  | 23   | 7  | 4E+05 | 0.008747 | SLC4A1AP   | 0.422679234586466 | 1 |
| COPD-CHD | ENSG00000149262 | 11 | 301  | 15 | 4E+05 | 0.008681 | INTS4      | 0.422679234586466 | 1 |
| COPD-CHD | ENSG00000166949 | 15 | 370  | 51 | 4E+05 | 0.00847  | SMAD3      | 0.415449117506631 | 1 |
| COPD-CHD | ENSG00000188186 | 7  | 8    | 2  | 4E+05 | 0.008358 | LAMTOR4    | 0.411036242287234 | 1 |
| COPD-CHD | ENSG00000171552 | 20 | 84   | 6  | 4E+05 | 0.008323 | BCL2L1     | 0.410406512266667 | 1 |
| COPD-CHD | ENSG00000172159 | 9  | 1142 | 73 | 4E+05 | 0.008287 | FRMD3      | 0.409709141176471 | 1 |

|          |                 |    |     |    |       |          |           |                   |   |
|----------|-----------------|----|-----|----|-------|----------|-----------|-------------------|---|
| COPD-CHD | ENSG00000186075 | 17 | 32  | 3  | 4E+05 | 0.008185 | ZBPB2     | 0.405741122252011 | 1 |
| COPD-CHD | ENSG00000164077 | 3  | 22  | 6  | 4E+05 | 0.008178 | MON1A     | 0.405741122252011 | 1 |
| COPD-CHD | ENSG00000186207 | 1  | 4   | 2  | 4E+05 | 0.008162 | LCE5A     | 0.405741122252011 | 1 |
| COPD-CHD | ENSG00000059378 | 7  | 140 | 19 | 4E+05 | 0.008157 | PARP12    | 0.405741122252011 | 1 |
| COPD-CHD | ENSG00000106261 | 7  | 40  | 8  | 4E+05 | 0.008149 | ZKSCAN1   | 0.405741122252011 | 1 |
| COPD-CHD | ENSG00000162888 | 1  | 22  | 6  | 4E+05 | 0.008148 | C1orf147  | 0.405741122252011 | 1 |
| COPD-CHD | ENSG00000162040 | 16 | 36  | 4  | 4E+05 | 0.008104 | HS3ST6    | 0.405741122252011 | 1 |
| COPD-CHD | ENSG00000137575 | 8  | 49  | 3  | 4E+05 | 0.008102 | SDCBP     | 0.405741122252011 | 1 |
| COPD-CHD | ENSG00000117475 | 1  | 74  | 9  | 4E+05 | 0.008044 | BLZF1     | 0.405741122252011 | 1 |
| COPD-CHD | ENSG00000173511 | 11 | 3   | 1  | 4E+05 | 0.007993 | VEGFB     | 0.405741122252011 | 1 |
| COPD-CHD | ENSG00000169509 | 1  | 5   | 2  | 4E+05 | 0.007957 | CRCT1     | 0.405334945454545 | 1 |
| COPD-CHD | ENSG00000104941 | 19 | 59  | 10 | 4E+05 | 0.007922 | RSPH6A    | 0.404646419337017 | 1 |
| COPD-CHD | ENSG00000197859 | 9  | 144 | 17 | 4E+05 | 0.007899 | ADAMTSL2  | 0.404599470914127 | 1 |
| COPD-CHD | ENSG00000055163 | 5  | 407 | 21 | 4E+05 | 0.007887 | CYFIP2    | 0.404599470914127 | 1 |
| COPD-CHD | ENSG00000196141 | 2  | 387 | 40 | 4E+05 | 0.00788  | SPATS2L   | 0.404599470914127 | 1 |
| COPD-CHD | ENSG00000077348 | 19 | 19  | 2  | 4E+05 | 0.007865 | EXOSC5    | 0.404599470914127 | 1 |
| COPD-CHD | ENSG00000136688 | 2  | 16  | 4  | 4E+05 | 0.007726 | IL36G     | 0.400177353221289 | 1 |
| COPD-CHD | ENSG00000235750 | 1  | 108 | 12 | 4E+05 | 0.007664 | KIAA0040  | 0.398096686516854 | 1 |
| COPD-CHD | ENSG00000169594 | 15 | 36  | 6  | 4E+05 | 0.007628 | BNC1      | 0.397311689577465 | 1 |
| COPD-CHD | ENSG00000129354 | 19 | 68  | 6  | 4E+05 | 0.007601 | AP1M2     | 0.397034155367232 | 1 |
| COPD-CHD | ENSG00000116793 | 1  | 99  | 10 | 4E+05 | 0.007555 | PHTF1     | 0.395728352974504 | 1 |
| COPD-CHD | ENSG00000131507 | 5  | 165 | 13 | 4E+05 | 0.00753  | NDFIP1    | 0.395534047       | 1 |
| COPD-CHD | ENSG00000163431 | 1  | 113 | 18 | 4E+05 | 0.007517 | LMOD1     | 0.395534047       | 1 |
| COPD-CHD | ENSG00000006282 | 17 | 44  | 7  | 4E+05 | 0.007474 | SPATA20   | 0.394883229714286 | 1 |
| COPD-CHD | ENSG00000165813 | 10 | 102 | 9  | 4E+05 | 0.007438 | C10orf118 | 0.394070231232092 | 1 |
| COPD-CHD | ENSG00000105229 | 19 | 102 | 10 | 4E+05 | 0.007423 | PIAS4     | 0.394070231232092 | 1 |
| COPD-CHD | ENSG00000100167 | 22 | 51  | 9  | 4E+05 | 0.007389 | SEPT3     | 0.393762381268012 | 1 |
| COPD-CHD | ENSG00000156194 | 4  | 72  | 10 | 4E+05 | 0.007362 | PPEF2     | 0.393420073988439 | 1 |
| COPD-CHD | ENSG00000196296 | 16 | 29  | 5  | 4E+05 | 0.007358 | ATP2A1    | 0.393420073988439 | 1 |
| COPD-CHD | ENSG00000198156 | 16 | 3   | 1  | 4E+05 | 0.007344 | NPIP6     | 0.393420073988439 | 1 |
| COPD-CHD | ENSG00000187492 | 3  | 14  | 5  | 4E+05 | 0.007285 | CDHR4     | 0.392731588921283 | 1 |
| COPD-CHD | ENSG00000159788 | 4  | 296 | 31 | 4E+05 | 0.007273 | RGS12     | 0.392731588921283 | 1 |
| COPD-CHD | ENSG00000171956 | 15 | 117 | 17 | 4E+05 | 0.007255 | FOXB1     | 0.392731588921283 | 1 |

|          |                 |    |     |    |       |          |            |                   |   |
|----------|-----------------|----|-----|----|-------|----------|------------|-------------------|---|
| COPD-CHD | ENSG00000138398 | 2  | 210 | 15 | 4E+05 | 0.007232 | PPIG       | 0.392731588921283 | 1 |
| COPD-CHD | ENSG00000095627 | 10 | 121 | 11 | 4E+05 | 0.007141 | TDRD1      | 0.389516460471976 | 1 |
| COPD-CHD | ENSG00000162992 | 2  | 7   | 2  | 4E+05 | 0.007133 | NEUROD1    | 0.389516460471976 | 1 |
| COPD-CHD | ENSG00000070444 | 17 | 45  | 7  | 4E+05 | 0.007112 | MNT        | 0.389516460471976 | 1 |
| COPD-CHD | ENSG00000106952 | 9  | 99  | 7  | 4E+05 | 0.007092 | TNFSF8     | 0.389516460471976 | 1 |
| COPD-CHD | ENSG00000145020 | 3  | 8   | 2  | 4E+05 | 0.007087 | AMT        | 0.389516460471976 | 1 |
| COPD-CHD | ENSG00000116824 | 1  | 30  | 6  | 4E+05 | 0.00707  | CD2        | 0.389516460471976 | 1 |
| COPD-CHD | ENSG00000160161 | 19 | 16  | 2  | 4E+05 | 0.006979 | CILP2      | 0.387550259159159 | 1 |
| COPD-CHD | ENSG00000117477 | 1  | 182 | 18 | 4E+05 | 0.006949 | CCDC181    | 0.387041136144578 | 1 |
| COPD-CHD | ENSG00000127616 | 19 | 275 | 20 | 4E+05 | 0.006858 | SMARCA4    | 0.383126816314199 | 1 |
| COPD-CHD | ENSG00000248098 | 19 | 109 | 4  | 4E+05 | 0.006846 | BCKDHA     | 0.383126816314199 | 1 |
| COPD-CHD | ENSG00000166444 | 11 | 494 | 26 | 4E+05 | 0.006814 | ST5        | 0.382943551671733 | 1 |
| COPD-CHD | ENSG00000164086 | 3  | 5   | 3  | 4E+05 | 0.006805 | DUSP7      | 0.382943551671733 | 1 |
| COPD-CHD | ENSG00000168610 | 17 | 143 | 12 | 4E+05 | 0.006789 | STAT3      | 0.382943551671733 | 1 |
| COPD-CHD | ENSG00000105705 | 19 | 89  | 10 | 4E+05 | 0.006693 | SUGP1      | 0.379610020245399 | 1 |
| COPD-CHD | ENSG00000175202 | 15 | 16  | 5  | 4E+05 | 0.006684 | HIGD2B     | 0.379610020245399 | 1 |
| COPD-CHD | ENSG00000213413 | 7  | 13  | 3  | 4E+05 | 0.006681 | PVRIG      | 0.379610020245399 | 1 |
| COPD-CHD | ENSG00000130598 | 11 | 6   | 3  | 4E+05 | 0.006655 | TNNI2      | 0.379610020245399 | 1 |
| COPD-CHD | ENSG00000134871 | 13 | 949 | 99 | 4E+05 | 0.006588 | COL4A2     | 0.378341939130435 | 1 |
| COPD-CHD | ENSG00000105198 | 19 | 8   | 4  | 4E+05 | 0.00654  | LGALS13    | 0.376749804672897 | 1 |
| COPD-CHD | ENSG00000135698 | 16 | 214 | 11 | 4E+05 | 0.00654  | MPHOSPH6   | 0.376749804672897 | 1 |
| COPD-CHD | ENSG00000173402 | 3  | 105 | 10 | 4E+05 | 0.006521 | DAG1       | 0.376749804672897 | 1 |
| COPD-CHD | ENSG00000139116 | 12 | 235 | 19 | 4E+05 | 0.00641  | KIF21A     | 0.372727389937107 | 1 |
| COPD-CHD | ENSG00000112182 | 6  | 727 | 72 | 4E+05 | 0.006389 | BACH2      | 0.372701562776025 | 1 |
| COPD-CHD | ENSG00000233538 | 2  | 1   | 1  | 4E+05 | 0.006333 | AC017104.2 | 0.370557299367089 | 1 |
| COPD-CHD | ENSG00000173442 | 11 | 24  | 7  | 4E+05 | 0.006288 | EHBP1L1    | 0.369115580952381 | 1 |
| COPD-CHD | ENSG00000170522 | 4  | 502 | 58 | 4E+05 | 0.006262 | ELOVL6     | 0.36876589522293  | 1 |
| COPD-CHD | ENSG00000100029 | 22 | 97  | 18 | 4E+05 | 0.006219 | PES1       | 0.367421486900959 | 1 |
| COPD-CHD | ENSG00000186451 | 3  | 40  | 8  | 4E+05 | 0.006193 | SPATA12    | 0.36704635        | 1 |
| COPD-CHD | ENSG00000172568 | 5  | 15  | 4  | 4E+05 | 0.006169 | FNDC9      | 0.366805550803859 | 1 |
| COPD-CHD | ENSG00000138061 | 2  | 155 | 19 | 4E+05 | 0.006169 | CYP1B1     | 0.366805550803859 | 1 |
| COPD-CHD | ENSG00000067560 | 3  | 82  | 8  | 4E+05 | 0.006158 | RHOA       | 0.366805550803859 | 1 |
| COPD-CHD | ENSG00000188816 | 10 | 4   | 1  | 4E+05 | 0.006124 | HMX2       | 0.366805550803859 | 1 |

|                          |    |      |     |       |          |            |                   |   |
|--------------------------|----|------|-----|-------|----------|------------|-------------------|---|
| COPD-CHD ENSG0000089280  | 16 | 7    | 3   | 4E+05 | 0.006117 | FUS        | 0.366805550803859 | 1 |
| COPD-CHD ENSG00000137547 | 8  | 25   | 3   | 4E+05 | 0.00602  | MRPL15     | 0.363771146732026 | 1 |
| COPD-CHD ENSG00000153214 | 2  | 122  | 20  | 4E+05 | 0.006017 | TMEM87B    | 0.363771146732026 | 1 |
| COPD-CHD ENSG0000044574  | 9  | 5    | 2   | 4E+05 | 0.006008 | HSPA5      | 0.363771146732026 | 1 |
| COPD-CHD ENSG00000183798 | 20 | 23   | 6   | 4E+05 | 0.005927 | EMILIN3    | 0.361721796369637 | 1 |
| COPD-CHD ENSG0000083799  | 16 | 81   | 10  | 4E+05 | 0.005917 | CYLD       | 0.361721796369637 | 1 |
| COPD-CHD ENSG00000153820 | 2  | 708  | 27  | 4E+05 | 0.005909 | SPHKAP     | 0.361721796369637 | 1 |
| COPD-CHD ENSG00000198077 | 19 | 29   | 6   | 4E+05 | 0.005907 | CYP2A7     | 0.361721796369637 | 1 |
| COPD-CHD ENSG00000175489 | 19 | 23   | 5   | 4E+05 | 0.005833 | LRRC25     | 0.360722922742475 | 1 |
| COPD-CHD ENSG0000065621  | 10 | 55   | 10  | 4E+05 | 0.005793 | GSTO2      | 0.359426568791946 | 1 |
| COPD-CHD ENSG00000217236 | 2  | 15   | 5   | 4E+05 | 0.005783 | SP9        | 0.359426568791946 | 1 |
| COPD-CHD ENSG00000183476 | 15 | 65   | 15  | 4E+05 | 0.005682 | SH2D7      | 0.354927248648649 | 1 |
| COPD-CHD ENSG00000169714 | 3  | 12   | 5   | 4E+05 | 0.005673 | CNBP       | 0.354927248648649 | 1 |
| COPD-CHD ENSG00000197272 | 16 | 27   | 6   | 4E+05 | 0.005666 | IL27       | 0.354927248648649 | 1 |
| COPD-CHD ENSG00000196923 | 5  | 19   | 6   | 4E+05 | 0.005661 | PDLIM7     | 0.354927248648649 | 1 |
| COPD-CHD ENSG00000125901 | 20 | 4    | 2   | 4E+05 | 0.005529 | MRPS26     | 0.350106820890411 | 1 |
| COPD-CHD ENSG00000188786 | 1  | 76   | 13  | 4E+05 | 0.005503 | MTF1       | 0.349702300343643 | 1 |
| COPD-CHD ENSG00000198478 | 6  | 182  | 22  | 4E+05 | 0.005474 | SH3BGRL2   | 0.349027189310345 | 1 |
| COPD-CHD ENSG00000196263 | 19 | 79   | 9   | 4E+05 | 0.005466 | ZNF471     | 0.349027189310345 | 1 |
| COPD-CHD ENSG00000133488 | 22 | 62   | 9   | 4E+05 | 0.005432 | SEC14L4    | 0.348741544097222 | 1 |
| COPD-CHD ENSG00000143222 | 1  | 10   | 3   | 4E+05 | 0.005395 | UFC1       | 0.347579257142857 | 1 |
| COPD-CHD ENSG00000268344 | 13 | 1    | 1   | 4E+05 | 0.005357 | AL138815.2 | 0.346344188461539 | 1 |
| COPD-CHD ENSG00000228008 | 3  | 11   | 3   | 4E+05 | 0.005342 | CTD-2330K9 | 0.346344188461539 | 1 |
| COPD-CHD ENSG00000151465 | 10 | 136  | 16  | 4E+05 | 0.005283 | CDC123     | 0.343945621830986 | 1 |
| COPD-CHD ENSG00000158186 | 3  | 128  | 11  | 4E+05 | 0.005197 | MRAS       | 0.339548338162544 | 1 |
| COPD-CHD ENSG00000120471 | 11 | 25   | 8   | 4E+05 | 0.005097 | TP53AIP1   | 0.334234660638298 | 1 |
| COPD-CHD ENSG00000197479 | 5  | 8    | 3   | 4E+05 | 0.005093 | PCDHB11    | 0.334234660638298 | 1 |
| COPD-CHD ENSG00000184608 | 8  | 295  | 23  | 4E+05 | 0.005074 | C8orf12    | 0.334234660638298 | 1 |
| COPD-CHD ENSG00000234465 | 19 | 23   | 6   | 4E+05 | 0.00502  | PINLYP     | 0.332678937634409 | 1 |
| COPD-CHD ENSG00000112499 | 6  | 342  | 23  | 4E+05 | 0.005019 | SLC22A2    | 0.332678937634409 | 1 |
| COPD-CHD ENSG00000141744 | 17 | 3    | 2   | 4E+05 | 0.004906 | PNMT       | 0.327477612635379 | 1 |
| COPD-CHD ENSG00000168769 | 4  | 258  | 24  | 4E+05 | 0.0049   | TET2       | 0.327477612635379 | 1 |
| COPD-CHD ENSG0000048471  | 16 | 2333 | 105 | 4E+05 | 0.004866 | SNX29      | 0.327183116       | 1 |

|          |                 |    |     |    |       |          |            |                   |   |
|----------|-----------------|----|-----|----|-------|----------|------------|-------------------|---|
| COPD-CHD | ENSG00000106290 | 7  | 20  | 5  | 4E+05 | 0.004864 | TAF6       | 0.327183116       | 1 |
| COPD-CHD | ENSG00000255524 | 16 | 11  | 3  | 4E+05 | 0.004837 | NPIP8      | 0.327183116       | 1 |
| COPD-CHD | ENSG00000162972 | 2  | 97  | 15 | 4E+05 | 0.004809 | C2orf47    | 0.326937195588235 | 1 |
| COPD-CHD | ENSG00000147459 | 8  | 570 | 49 | 4E+05 | 0.004663 | DOCK5      | 0.318174841697417 | 1 |
| COPD-CHD | ENSG00000173064 | 12 | 222 | 16 | 4E+05 | 0.004632 | HECTD4     | 0.317223377777778 | 1 |
| COPD-CHD | ENSG00000088298 | 20 | 338 | 18 | 4E+05 | 0.004627 | EDEM2      | 0.317223377777778 | 1 |
| COPD-CHD | ENSG00000008838 | 17 | 86  | 9  | 4E+05 | 0.004622 | MED24      | 0.317223377777778 | 1 |
| COPD-CHD | ENSG00000169194 | 5  | 8   | 2  | 4E+05 | 0.004574 | IL13       | 0.316750137453184 | 1 |
| COPD-CHD | ENSG00000099994 | 22 | 22  | 7  | 4E+05 | 0.00457  | SUSD2      | 0.316750137453184 | 1 |
| COPD-CHD | ENSG00000130513 | 19 | 55  | 9  | 4E+05 | 0.004532 | GDF15      | 0.316203077735849 | 1 |
| COPD-CHD | ENSG00000119397 | 9  | 203 | 15 | 4E+05 | 0.004524 | CNTRL      | 0.316203077735849 | 1 |
| COPD-CHD | ENSG00000139370 | 12 | 121 | 9  | 4E+05 | 0.004506 | SLC15A4    | 0.316203077735849 | 1 |
| COPD-CHD | ENSG00000154473 | 10 | 14  | 1  | 4E+05 | 0.004483 | BUB3       | 0.316203077735849 | 1 |
| COPD-CHD | ENSG00000225828 | 1  | 1   | 1  | 4E+05 | 0.004404 | FAM229A    | 0.311973634099617 | 1 |
| COPD-CHD | ENSG00000197520 | 1  | 15  | 4  | 4E+05 | 0.004379 | FAM177B    | 0.311395551923077 | 1 |
| COPD-CHD | ENSG00000181693 | 11 | 4   | 2  | 4E+05 | 0.004373 | OR8H1      | 0.311395551923077 | 1 |
| COPD-CHD | ENSG00000137494 | 11 | 128 | 15 | 4E+05 | 0.00436  | ANKRD42    | 0.311395551923077 | 1 |
| COPD-CHD | ENSG00000198380 | 2  | 118 | 6  | 4E+05 | 0.004343 | GFPT1      | 0.311395551923077 | 1 |
| COPD-CHD | ENSG00000176986 | 10 | 35  | 6  | 4E+05 | 0.004302 | SEC24C     | 0.310742699609375 | 1 |
| COPD-CHD | ENSG00000143554 | 1  | 7   | 4  | 4E+05 | 0.00423  | SLC27A3    | 0.306733058823529 | 1 |
| COPD-CHD | ENSG00000066923 | 7  | 114 | 8  | 4E+05 | 0.004179 | STAG3      | 0.304242469291339 | 1 |
| COPD-CHD | ENSG00000148842 | 10 | 399 | 19 | 4E+05 | 0.004113 | CNNM2      | 0.300613960869565 | 1 |
| COPD-CHD | ENSG00000172650 | 10 | 12  | 4  | 4E+05 | 0.004078 | AGAP5      | 0.29920199047619  | 1 |
| COPD-CHD | ENSG00000156603 | 11 | 8   | 3  | 4E+05 | 0.004077 | MED19      | 0.29920199047619  | 1 |
| COPD-CHD | ENSG00000198373 | 16 | 445 | 24 | 4E+05 | 0.004058 | WWP2       | 0.29920199047619  | 1 |
| COPD-CHD | ENSG00000001617 | 3  | 57  | 8  | 4E+05 | 0.004019 | SEMA3F     | 0.298425432128514 | 1 |
| COPD-CHD | ENSG00000150261 | 11 | 4   | 2  | 4E+05 | 0.003984 | OR8K1      | 0.297056423790323 | 1 |
| COPD-CHD | ENSG00000175445 | 8  | 148 | 23 | 4E+05 | 0.003979 | LPL        | 0.297056423790323 | 1 |
| COPD-CHD | ENSG00000196968 | 10 | 9   | 2  | 4E+05 | 0.00397  | FUT11      | 0.297056423790323 | 1 |
| COPD-CHD | ENSG00000164078 | 3  | 21  | 4  | 4E+05 | 0.003907 | MST1R      | 0.294889939591837 | 1 |
| COPD-CHD | ENSG00000204038 | 10 | 31  | 4  | 4E+05 | 0.003875 | AL359195.1 | 0.293688612295082 | 1 |
| COPD-CHD | ENSG00000164061 | 3  | 159 | 14 | 4E+05 | 0.003862 | BSN        | 0.293688612295082 | 1 |
| COPD-CHD | ENSG00000169682 | 16 | 14  | 5  | 4E+05 | 0.003855 | SPNS1      | 0.293688612295082 | 1 |

|          |                 |    |      |     |       |          |              |                   |   |
|----------|-----------------|----|------|-----|-------|----------|--------------|-------------------|---|
| COPD-CHD | ENSG00000196782 | 4  | 1054 | 101 | 4E+05 | 0.003844 | MAML3        | 0.293688612295082 | 1 |
| COPD-CHD | ENSG00000145022 | 3  | 6    | 2   | 4E+05 | 0.003833 | TCTA         | 0.293688612295082 | 1 |
| COPD-CHD | ENSG00000167914 | 17 | 48   | 7   | 4E+05 | 0.003805 | GSDMA        | 0.293688612295082 | 1 |
| COPD-CHD | ENSG00000224470 | 16 | 68   | 11  | 4E+05 | 0.003772 | ATXNIL       | 0.293043503361345 | 1 |
| COPD-CHD | ENSG00000142694 | 1  | 3    | 1   | 4E+05 | 0.003763 | EVA1B        | 0.293043503361345 | 1 |
| COPD-CHD | ENSG00000143398 | 1  | 59   | 7   | 4E+05 | 0.003718 | PIP5K1A      | 0.29133510720339  | 1 |
| COPD-CHD | ENSG00000131143 | 16 | 15   | 4   | 4E+05 | 0.003718 | COX4I1       | 0.29133510720339  | 1 |
| COPD-CHD | ENSG00000178952 | 16 | 7    | 2   | 4E+05 | 0.003621 | TUFM         | 0.286136371794872 | 1 |
| COPD-CHD | ENSG00000050438 | 12 | 248  | 19  | 4E+05 | 0.003613 | SLC4A8       | 0.286136371794872 | 1 |
| COPD-CHD | ENSG00000137571 | 8  | 423  | 35  | 4E+05 | 0.003609 | SLCO5A1      | 0.286136371794872 | 1 |
| COPD-CHD | ENSG00000213420 | 7  | 7    | 3   | 4E+05 | 0.003606 | GPC2         | 0.286136371794872 | 1 |
| COPD-CHD | ENSG00000143156 | 1  | 760  | 18  | 4E+05 | 0.003572 | NME7         | 0.286136371794872 | 1 |
| COPD-CHD | ENSG00000214491 | 22 | 93   | 10  | 4E+05 | 0.003504 | SEC14L6      | 0.282936524017467 | 1 |
| COPD-CHD | ENSG00000205730 | 16 | 5    | 2   | 4E+05 | 0.003499 | ITPRIPL2     | 0.282936524017467 | 1 |
| COPD-CHD | ENSG00000064199 | 11 | 9    | 4   | 4E+05 | 0.003474 | SPA17        | 0.282936524017467 | 1 |
| COPD-CHD | ENSG00000076685 | 10 | 236  | 17  | 4E+05 | 0.003416 | NT5C2        | 0.279475919469027 | 1 |
| COPD-CHD | ENSG00000235931 | 10 | 19   | 4   | 4E+05 | 0.003387 | C10orf40     | 0.278375841333333 | 1 |
| COPD-CHD | ENSG00000129158 | 11 | 417  | 38  | 4E+05 | 0.003341 | SERGEF       | 0.275813076785714 | 1 |
| COPD-CHD | ENSG00000168484 | 8  | 22   | 8   | 4E+05 | 0.003337 | SFTPC        | 0.275813076785714 | 1 |
| COPD-CHD | ENSG00000178149 | 3  | 4    | 2   | 4E+05 | 0.003316 | DALRD3       | 0.275813076785714 | 1 |
| COPD-CHD | ENSG00000213996 | 19 | 22   | 5   | 4E+05 | 0.003299 | TM6SF2       | 0.275813076785714 | 1 |
| COPD-CHD | ENSG00000250038 | 4  | 114  | 11  | 4E+05 | 0.003281 | RP11-180C1.1 | 0.27573443        | 1 |
| COPD-CHD | ENSG00000119912 | 10 | 229  | 25  | 4E+05 | 0.003271 | IDE          | 0.27573443        | 1 |
| COPD-CHD | ENSG00000177238 | 16 | 6    | 2   | 4E+05 | 0.003261 | TRIM72       | 0.27573443        | 1 |
| COPD-CHD | ENSG00000138668 | 4  | 48   | 5   | 4E+05 | 0.003226 | HNRNPD       | 0.274851246543779 | 1 |
| COPD-CHD | ENSG00000132376 | 17 | 93   | 13  | 4E+05 | 0.003174 | INPP5K       | 0.271689290277778 | 1 |
| COPD-CHD | ENSG00000221838 | 7  | 20   | 4   | 4E+05 | 0.003095 | AP4M1        | 0.266175794883721 | 1 |
| COPD-CHD | ENSG00000166507 | 10 | 12   | 3   | 4E+05 | 0.003094 | NDST2        | 0.266175794883721 | 1 |
| COPD-CHD | ENSG00000213658 | 16 | 5    | 2   | 4E+05 | 0.00309  | LAT          | 0.266175794883721 | 1 |
| COPD-CHD | ENSG00000164087 | 3  | 85   | 10  | 4E+05 | 0.003067 | POC1A        | 0.266175794883721 | 1 |
| COPD-CHD | ENSG00000130164 | 19 | 153  | 20  | 4E+05 | 0.003067 | LDLR         | 0.266175794883721 | 1 |
| COPD-CHD | ENSG00000179832 | 8  | 97   | 12  | 4E+05 | 0.003065 | MROH1        | 0.266175794883721 | 1 |
| COPD-CHD | ENSG00000213185 | 10 | 32   | 10  | 4E+05 | 0.003061 | FAM24B       | 0.266175794883721 | 1 |

|                          |    |     |    |       |                      |                   |   |
|--------------------------|----|-----|----|-------|----------------------|-------------------|---|
| COPD-CHD ENSG00000183560 | 11 | 7   | 1  | 4E+05 | 0.003031 FOLR4       | 0.266175794883721 | 1 |
| COPD-CHD ENSG0000010539  | 16 | 33  | 6  | 4E+05 | 0.00303 ZNF200       | 0.266175794883721 | 1 |
| COPD-CHD ENSG00000166166 | 14 | 18  | 3  | 4E+05 | 0.003007 TRMT61A     | 0.266175794883721 | 1 |
| COPD-CHD ENSG00000120324 | 5  | 8   | 3  | 4E+05 | 0.002984 PCDHB10     | 0.266175794883721 | 1 |
| COPD-CHD ENSG00000175866 | 17 | 369 | 44 | 4E+05 | 0.002968 BAIAP2      | 0.266175794883721 | 1 |
| COPD-CHD ENSG00000145029 | 3  | 7   | 4  | 4E+05 | 0.002956 NICN1       | 0.266175794883721 | 1 |
| COPD-CHD ENSG00000221986 | 1  | 39  | 9  | 4E+05 | 0.002896 MYBPHL      | 0.265107847029703 | 1 |
| COPD-CHD ENSG00000168488 | 16 | 29  | 3  | 4E+05 | 0.002894 ATXN2L      | 0.265107847029703 | 1 |
| COPD-CHD ENSG00000136828 | 9  | 505 | 15 | 4E+05 | 0.002886 RALGPS1     | 0.265107847029703 | 1 |
| COPD-CHD ENSG00000188981 | 4  | 98  | 9  | 4E+05 | 0.002821 MSANTD1     | 0.262079726130653 | 1 |
| COPD-CHD ENSG00000100243 | 22 | 104 | 14 | 4E+05 | 0.002809 CYB5R3      | 0.262079726130653 | 1 |
| COPD-CHD ENSG00000072682 | 5  | 248 | 21 | 4E+05 | 0.0028 P4HA2         | 0.262079726130653 | 1 |
| COPD-CHD ENSG00000154305 | 1  | 116 | 10 | 4E+05 | 0.002793 MIA3        | 0.262079726130653 | 1 |
| COPD-CHD ENSG00000143226 | 1  | 62  | 11 | 4E+05 | 0.00276 FCGR2A       | 0.261690321538462 | 1 |
| COPD-CHD ENSG00000137500 | 11 | 65  | 7  | 4E+05 | 0.002753 CCDC90B     | 0.261690321538462 | 1 |
| COPD-CHD ENSG00000138472 | 3  | 170 | 22 | 4E+05 | 0.00275 GUCA1C       | 0.261690321538462 | 1 |
| COPD-CHD ENSG00000140391 | 15 | 28  | 6  | 4E+05 | 0.00272 TSPAN3       | 0.261690321538462 | 1 |
| COPD-CHD ENSG00000175029 | 10 | 670 | 64 | 4E+05 | 0.002673 CTBP2       | 0.258757826178011 | 1 |
| COPD-CHD ENSG00000101203 | 20 | 123 | 11 | 4E+05 | 0.002666 COL20A1     | 0.258757826178011 | 1 |
| COPD-CHD ENSG00000186866 | 21 | 63  | 7  | 4E+05 | 0.002665 POFUT2      | 0.258757826178011 | 1 |
| COPD-CHD ENSG00000158019 | 2  | 902 | 42 | 4E+05 | 0.002663 BRE         | 0.258757826178011 | 1 |
| COPD-CHD ENSG00000203795 | 10 | 6   | 3  | 4E+05 | 0.00266 FAM24A       | 0.258757826178011 | 1 |
| COPD-CHD ENSG00000135443 | 12 | 24  | 8  | 4E+05 | 0.002651 KRT85       | 0.258757826178011 | 1 |
| COPD-CHD ENSG00000178188 | 16 | 41  | 3  | 4E+05 | 0.002643 SH2B1       | 0.258757826178011 | 1 |
| COPD-CHD ENSG00000148660 | 10 | 67  | 7  | 4E+05 | 0.002617 CAMK2G      | 0.258757826178011 | 1 |
| COPD-CHD ENSG00000167083 | 17 | 26  | 7  | 4E+05 | 0.002596 GNGT2       | 0.258757826178011 | 1 |
| COPD-CHD ENSG00000268797 | 19 | 307 | 38 | 4E+05 | 0.002592 CTC-490E21. | 0.258757826178011 | 1 |
| COPD-CHD ENSG00000158793 | 1  | 9   | 4  | 4E+05 | 0.002592 NIT1        | 0.258757826178011 | 1 |
| COPD-CHD ENSG00000161849 | 12 | 59  | 4  | 4E+05 | 0.002576 KRT84       | 0.258757826178011 | 1 |
| COPD-CHD ENSG00000163660 | 3  | 26  | 4  | 4E+05 | 0.002563 CCNL1       | 0.258757826178011 | 1 |
| COPD-CHD ENSG00000132773 | 1  | 5   | 3  | 4E+05 | 0.002521 TOE1        | 0.258757826178011 | 1 |
| COPD-CHD ENSG00000204084 | 1  | 185 | 20 | 4E+05 | 0.002511 INPP5B      | 0.258757826178011 | 1 |
| COPD-CHD ENSG00000102984 | 16 | 61  | 9  | 4E+05 | 0.00245 ZNF821       | 0.257382113       | 1 |

|          |                 |    |     |    |       |          |             |                   |   |
|----------|-----------------|----|-----|----|-------|----------|-------------|-------------------|---|
| COPD-CHD | ENSG00000205089 | 5  | 7   | 2  | 4E+05 | 0.002422 | CCNI2       | 0.255947138857143 | 1 |
| COPD-CHD | ENSG00000198892 | 1  | 7   | 3  | 4E+05 | 0.002418 | SHISA4      | 0.255947138857143 | 1 |
| COPD-CHD | ENSG00000081177 | 14 | 95  | 10 | 4E+05 | 0.002409 | EXD2        | 0.255947138857143 | 1 |
| COPD-CHD | ENSG00000074201 | 11 | 247 | 19 | 4E+05 | 0.002401 | CLNS1A      | 0.255947138857143 | 1 |
| COPD-CHD | ENSG00000205334 | 2  | 13  | 4  | 4E+05 | 0.002383 | AC074091.13 | 0.255947138857143 | 1 |
| COPD-CHD | ENSG00000110075 | 11 | 225 | 11 | 4E+05 | 0.002371 | PPP6R3      | 0.255947138857143 | 1 |
| COPD-CHD | ENSG00000120992 | 8  | 109 | 7  | 4E+05 | 0.002305 | LYPLA1      | 0.252155968047337 | 1 |
| COPD-CHD | ENSG00000182149 | 16 | 167 | 15 | 4E+05 | 0.002278 | IST1        | 0.25067412202381  | 1 |
| COPD-CHD | ENSG00000166147 | 15 | 361 | 13 | 4E+05 | 0.002273 | FBN1        | 0.25067412202381  | 1 |
| COPD-CHD | ENSG00000107960 | 10 | 88  | 8  | 4E+05 | 0.002253 | OBFC1       | 0.25067412202381  | 1 |
| COPD-CHD | ENSG00000184730 | 16 | 9   | 2  | 4E+05 | 0.0022   | APOBR       | 0.246513046666667 | 1 |
| COPD-CHD | ENSG00000103449 | 16 | 16  | 6  | 4E+05 | 0.002187 | SALL1       | 0.246513046666667 | 1 |
| COPD-CHD | ENSG00000158850 | 1  | 6   | 2  | 4E+05 | 0.002187 | B4GALT3     | 0.246513046666667 | 1 |
| COPD-CHD | ENSG00000173208 | 12 | 138 | 17 | 4E+05 | 0.002186 | ABCD2       | 0.246513046666667 | 1 |
| COPD-CHD | ENSG00000198758 | 1  | 43  | 12 | 4E+05 | 0.002177 | EPS8L3      | 0.246513046666667 | 1 |
| COPD-CHD | ENSG00000183066 | 22 | 109 | 9  | 4E+05 | 0.002141 | WBP2NL      | 0.246513046666667 | 1 |
| COPD-CHD | ENSG00000136694 | 2  | 6   | 2  | 4E+05 | 0.002049 | IL36A       | 0.238301308805031 | 1 |
| COPD-CHD | ENSG00000142599 | 1  | 659 | 22 | 4E+05 | 0.001982 | RERE        | 0.231898205696203 | 1 |
| COPD-CHD | ENSG00000154102 | 16 | 215 | 19 | 4E+05 | 0.001961 | C16orf74    | 0.230937278980892 | 1 |
| COPD-CHD | ENSG00000178301 | 11 | 41  | 5  | 4E+05 | 0.00192  | AQP11       | 0.227617098076923 | 1 |
| COPD-CHD | ENSG00000136859 | 9  | 54  | 9  | 4E+05 | 0.001884 | ANGPTL2     | 0.224707403870968 | 1 |
| COPD-CHD | ENSG00000187664 | 19 | 16  | 3  | 4E+05 | 0.001873 | HAPLN4      | 0.224707403870968 | 1 |
| COPD-CHD | ENSG00000088387 | 13 | 890 | 29 | 4E+05 | 0.001864 | DOCK9       | 0.224707403870968 | 1 |
| COPD-CHD | ENSG00000173531 | 3  | 6   | 3  | 4E+05 | 0.001812 | MST1        | 0.220395688815789 | 1 |
| COPD-CHD | ENSG00000119669 | 14 | 6   | 2  | 4E+05 | 0.001797 | IRF2BPL     | 0.220055145695364 | 1 |
| COPD-CHD | ENSG00000131067 | 20 | 47  | 7  | 4E+05 | 0.001745 | GGT7        | 0.215074984666667 | 1 |
| COPD-CHD | ENSG00000176476 | 16 | 82  | 9  | 4E+05 | 0.001744 | CCDC101     | 0.215074984666667 | 1 |
| COPD-CHD | ENSG00000174145 | 4  | 681 | 56 | 4E+05 | 0.001739 | KIAA1239    | 0.215074984666667 | 1 |
| COPD-CHD | ENSG00000128285 | 22 | 7   | 2  | 4E+05 | 0.001725 | MCHR1       | 0.215074984666667 | 1 |
| COPD-CHD | ENSG00000136930 | 9  | 97  | 12 | 4E+05 | 0.001716 | PSMB7       | 0.215074984666667 | 1 |
| COPD-CHD | ENSG00000268241 | 2  | 2   | 1  | 4E+05 | 0.001708 | AC018470.1  | 0.215074984666667 | 1 |
| COPD-CHD | ENSG00000100711 | 14 | 43  | 10 | 4E+05 | 0.001704 | ZFYVE21     | 0.215074984666667 | 1 |
| COPD-CHD | ENSG00000149084 | 11 | 624 | 25 | 4E+05 | 0.001702 | HSD17B12    | 0.215074984666667 | 1 |

|          |                 |    |      |     |       |          |             |                   |   |
|----------|-----------------|----|------|-----|-------|----------|-------------|-------------------|---|
| COPD-CHD | ENSG00000158092 | 3  | 185  | 6   | 4E+05 | 0.001701 | NCK1        | 0.215074984666667 | 1 |
| COPD-CHD | ENSG00000272916 | 10 | 15   | 4   | 4E+05 | 0.001696 | RP11-574K11 | 0.215074984666667 | 1 |
| COPD-CHD | ENSG00000158796 | 1  | 11   | 3   | 4E+05 | 0.001682 | DEDD        | 0.215074984666667 | 1 |
| COPD-CHD | ENSG00000233276 | 3  | 3    | 1   | 4E+05 | 0.001644 | GPX1        | 0.215074984666667 | 1 |
| COPD-CHD | ENSG00000164068 | 3  | 45   | 7   | 4E+05 | 0.001629 | RNF123      | 0.215074984666667 | 1 |
| COPD-CHD | ENSG00000090104 | 1  | 12   | 4   | 4E+05 | 0.001619 | RGS1        | 0.215074984666667 | 1 |
| COPD-CHD | ENSG00000113161 | 5  | 45   | 7   | 4E+05 | 0.001611 | HMGCR       | 0.215074984666667 | 1 |
| COPD-CHD | ENSG00000162426 | 1  | 77   | 11  | 4E+05 | 0.001593 | SLC45A1     | 0.215074984666667 | 1 |
| COPD-CHD | ENSG00000181019 | 16 | 51   | 11  | 4E+05 | 0.001584 | NQO1        | 0.215074984666667 | 1 |
| COPD-CHD | ENSG00000153208 | 2  | 449  | 17  | 4E+05 | 0.001574 | MERTK       | 0.215074984666667 | 1 |
| COPD-CHD | ENSG00000109736 | 4  | 8    | 4   | 4E+05 | 0.001537 | MFSD10      | 0.215074984666667 | 1 |
| COPD-CHD | ENSG00000132793 | 20 | 49   | 11  | 4E+05 | 0.001506 | LPIN3       | 0.212575923664122 | 1 |
| COPD-CHD | ENSG00000067836 | 16 | 14   | 4   | 4E+05 | 0.001491 | ROGDI       | 0.212134441538462 | 1 |
| COPD-CHD | ENSG00000114349 | 3  | 3    | 1   | 4E+05 | 0.001477 | GNAT1       | 0.211643112403101 | 1 |
| COPD-CHD | ENSG00000172869 | 5  | 289  | 26  | 4E+05 | 0.001438 | DMXL1       | 0.20774927421875  | 1 |
| COPD-CHD | ENSG00000169900 | 16 | 1    | 1   | 4E+05 | 0.001429 | PYDC1       | 0.20774927421875  | 1 |
| COPD-CHD | ENSG00000179915 | 2  | 3426 | 115 | 4E+05 | 0.001352 | NRXN1       | 0.198455391269841 | 1 |
| COPD-CHD | ENSG00000102967 | 16 | 50   | 9   | 4E+05 | 0.001337 | DHODH       | 0.197735358       | 1 |
| COPD-CHD | ENSG00000198492 | 1  | 48   | 6   | 4E+05 | 0.001336 | YTHDF2      | 0.197735358       | 1 |
| COPD-CHD | ENSG00000178922 | 1  | 7    | 3   | 4E+05 | 0.001335 | HYI         | 0.197735358       | 1 |
| COPD-CHD | ENSG00000242114 | 22 | 9    | 4   | 4E+05 | 0.001307 | MTFP1       | 0.197735358       | 1 |
| COPD-CHD | ENSG00000048649 | 11 | 320  | 12  | 4E+05 | 0.001305 | RSF1        | 0.197735358       | 1 |
| COPD-CHD | ENSG00000196502 | 16 | 56   | 5   | 4E+05 | 0.001285 | SULT1A1     | 0.197735358       | 1 |
| COPD-CHD | ENSG00000148841 | 10 | 49   | 8   | 4E+05 | 0.001257 | ITPRIP      | 0.195258744537815 | 1 |
| COPD-CHD | ENSG00000185158 | 17 | 54   | 5   | 4E+05 | 0.001254 | LRRC37B     | 0.195258744537815 | 1 |
| COPD-CHD | ENSG00000197165 | 16 | 20   | 4   | 4E+05 | 0.001252 | SULT1A2     | 0.195258744537815 | 1 |
| COPD-CHD | ENSG00000164076 | 3  | 16   | 4   | 4E+05 | 0.001225 | CAMKV       | 0.195258744537815 | 1 |
| COPD-CHD | ENSG00000196526 | 4  | 898  | 36  | 4E+05 | 0.001221 | AFAP1       | 0.195258744537815 | 1 |
| COPD-CHD | ENSG00000168124 | 16 | 3    | 1   | 4E+05 | 0.00122  | OR1F1       | 0.195258744537815 | 1 |
| COPD-CHD | ENSG00000183763 | 3  | 37   | 5   | 4E+05 | 0.00122  | TRAIP       | 0.195258744537815 | 1 |
| COPD-CHD | ENSG00000087274 | 4  | 135  | 15  | 4E+05 | 0.001184 | ADD1        | 0.195258744537815 | 1 |
| COPD-CHD | ENSG00000119408 | 9  | 237  | 24  | 4E+05 | 0.00118  | NEK6        | 0.195258744537815 | 1 |
| COPD-CHD | ENSG00000143224 | 1  | 16   | 5   | 4E+05 | 0.001173 | PPOX        | 0.195258744537815 | 1 |

|          |                 |    |     |    |       |          |              |                   |   |
|----------|-----------------|----|-----|----|-------|----------|--------------|-------------------|---|
| COPD-CHD | ENSG0000073605  | 17 | 48  | 4  | 4E+05 | 0.001166 | GSDMB        | 0.195258744537815 | 1 |
| COPD-CHD | ENSG00000168917 | 3  | 95  | 4  | 4E+05 | 0.001161 | SLC35G2      | 0.195258744537815 | 1 |
| COPD-CHD | ENSG00000130202 | 19 | 170 | 22 | 4E+05 | 0.001154 | PVRL2        | 0.195258744537815 | 1 |
| COPD-CHD | ENSG00000089009 | 12 | 11  | 4  | 4E+05 | 0.001149 | RPL6         | 0.195258744537815 | 1 |
| COPD-CHD | ENSG00000164161 | 4  | 172 | 13 | 4E+05 | 0.001134 | HHIP         | 0.195258744537815 | 1 |
| COPD-CHD | ENSG00000138161 | 10 | 48  | 13 | 4E+05 | 0.001121 | CUZD1        | 0.195258744537815 | 1 |
| COPD-CHD | ENSG00000172349 | 15 | 384 | 25 | 4E+05 | 0.001101 | IL16         | 0.195258744537815 | 1 |
| COPD-CHD | ENSG00000143256 | 1  | 28  | 4  | 4E+05 | 0.001084 | PFDN2        | 0.195258744537815 | 1 |
| COPD-CHD | ENSG00000214435 | 10 | 105 | 11 | 4E+05 | 0.00106  | AS3MT        | 0.194118884158416 | 1 |
| COPD-CHD | ENSG00000185888 | 1  | 101 | 16 | 4E+05 | 0.000993 | PRSS38       | 0.183704387       | 1 |
| COPD-CHD | ENSG00000166275 | 10 | 23  | 6  | 4E+05 | 0.000983 | C10orf32     | 0.183555861111111 | 1 |
| COPD-CHD | ENSG00000138674 | 4  | 177 | 9  | 4E+05 | 0.000979 | SEC31A       | 0.183555861111111 | 1 |
| COPD-CHD | ENSG00000169783 | 15 | 607 | 35 | 4E+05 | 0.000978 | LINGO1       | 0.183555861111111 | 1 |
| COPD-CHD | ENSG00000198700 | 1  | 83  | 13 | 4E+05 | 0.000931 | IPO9         | 0.179304916       | 1 |
| COPD-CHD | ENSG00000100372 | 22 | 62  | 7  | 4E+05 | 0.000919 | SLC25A17     | 0.178815755684211 | 1 |
| COPD-CHD | ENSG00000264545 | 9  | 441 | 45 | 4E+05 | 0.000902 | RP11-145E5.5 | 0.177464421808511 | 1 |
| COPD-CHD | ENSG00000114378 | 3  | 14  | 5  | 4E+05 | 0.000885 | HYAL1        | 0.176014437204301 | 1 |
| COPD-CHD | ENSG00000198670 | 6  | 227 | 18 | 4E+05 | 0.000874 | LPA          | 0.175616262608696 | 1 |
| COPD-CHD | ENSG00000141736 | 17 | 42  | 7  | 4E+05 | 0.000841 | ERBB2        | 0.170958438901099 | 1 |
| COPD-CHD | ENSG00000187735 | 8  | 97  | 7  | 4E+05 | 0.000833 | TCEA1        | 0.170958438901099 | 1 |
| COPD-CHD | ENSG00000184983 | 22 | 9   | 2  | 4E+05 | 0.000816 | NDUFA6       | 0.169533383033708 | 1 |
| COPD-CHD | ENSG00000105323 | 19 | 64  | 6  | 4E+05 | 0.000808 | HNRNPUL1     | 0.169533383033708 | 1 |
| COPD-CHD | ENSG00000172037 | 3  | 10  | 6  | 4E+05 | 0.000773 | LAMB2        | 0.164197954597701 | 1 |
| COPD-CHD | ENSG00000188603 | 16 | 27  | 4  | 4E+05 | 0.000772 | CLN3         | 0.164197954597701 | 1 |
| COPD-CHD | ENSG00000070540 | 17 | 98  | 16 | 4E+05 | 0.000766 | WIPI1        | 0.164197954597701 | 1 |
| COPD-CHD | ENSG00000270316 | 10 | 139 | 14 | 4E+05 | 0.000756 | C10orf32-AS1 | 0.164197954597701 | 1 |
| COPD-CHD | ENSG00000172057 | 17 | 10  | 4  | 4E+05 | 0.00073  | ORMDL3       | 0.162653965060241 | 1 |
| COPD-CHD | ENSG00000176095 | 3  | 88  | 8  | 4E+05 | 0.000705 | IP6K1        | 0.15890083        | 1 |
| COPD-CHD | ENSG00000166033 | 10 | 192 | 26 | 4E+05 | 0.000698 | HTRA1        | 0.15890083        | 1 |
| COPD-CHD | ENSG00000140403 | 15 | 56  | 10 | 4E+05 | 0.000678 | DNAJA4       | 0.156822171       | 1 |
| COPD-CHD | ENSG00000261832 | 16 | 22  | 3  | 4E+05 | 0.000678 | CLN3         | 0.156822171       | 1 |
| COPD-CHD | ENSG00000198951 | 22 | 19  | 4  | 4E+05 | 0.000668 | NAGA         | 0.156822171       | 1 |
| COPD-CHD | ENSG00000148795 | 10 | 18  | 3  | 4E+05 | 0.000664 | CYP17A1      | 0.156822171       | 1 |

|                          |    |      |    |       |          |             |                    |   |
|--------------------------|----|------|----|-------|----------|-------------|--------------------|---|
| COPD-CHD ENSG00000118900 | 16 | 131  | 16 | 4E+05 | 0.000617 | UBN1        | 0.150178549342105  | 1 |
| COPD-CHD ENSG00000104447 | 8  | 509  | 17 | 4E+05 | 0.000597 | TRPS1       | 0.147124257866667  | 1 |
| COPD-CHD ENSG00000178691 | 17 | 161  | 5  | 4E+05 | 0.000593 | SUZ12       | 0.147124257866667  | 1 |
| COPD-CHD ENSG00000143126 | 1  | 75   | 13 | 4E+05 | 0.000584 | CELSR2      | 0.147124257866667  | 1 |
| COPD-CHD ENSG00000170122 | 9  | 2    | 1  | 4E+05 | 0.00053  | FOXD4       | 0.136186215        | 1 |
| COPD-CHD ENSG00000256500 | 14 | 284  | 16 | 4E+05 | 0.000514 | RP11-73M18. | 0.133937344788732  | 1 |
| COPD-CHD ENSG00000172548 | 5  | 47   | 8  | 4E+05 | 0.000494 | NIPAL4      | 0.130520044285714  | 1 |
| COPD-CHD ENSG00000183172 | 22 | 5    | 1  | 4E+05 | 0.000491 | SMDT1       | 0.130520044285714  | 1 |
| COPD-CHD ENSG00000167085 | 17 | 23   | 8  | 4E+05 | 0.000448 | PHB         | 0.121842093676471  | 1 |
| COPD-CHD ENSG00000258429 | 16 | 5    | 2  | 4E+05 | 0.000435 | PDF         | 0.120031428656716  | 1 |
| COPD-CHD ENSG00000126214 | 14 | 322  | 17 | 4E+05 | 0.000435 | KLC1        | 0.120031428656716  | 1 |
| COPD-CHD ENSG00000159479 | 1  | 4    | 2  | 4E+05 | 0.000414 | MED8        | 0.117736464153846  | 1 |
| COPD-CHD ENSG00000139990 | 14 | 157  | 18 | 4E+05 | 0.000388 | DCAF5       | 0.1120727953125    | 1 |
| COPD-CHD ENSG00000120885 | 8  | 37   | 6  | 4E+05 | 0.00035  | CLU         | 0.10282757047619   | 1 |
| COPD-CHD ENSG00000188266 | 15 | 51   | 3  | 4E+05 | 0.00035  | HYKK        | 0.10282757047619   | 1 |
| COPD-CHD ENSG00000161395 | 17 | 63   | 3  | 4E+05 | 0.000328 | PGAP3       | 0.0995300809836066 | 1 |
| COPD-CHD ENSG00000187555 | 16 | 185  | 17 | 4E+05 | 0.000327 | USP7        | 0.0995300809836066 | 1 |
| COPD-CHD ENSG00000142039 | 19 | 25   | 2  | 4E+05 | 0.000327 | CCDC97      | 0.0995300809836066 | 1 |
| COPD-CHD ENSG00000105329 | 19 | 94   | 12 | 4E+05 | 0.000323 | TGFB1       | 0.0995300809836066 | 1 |
| COPD-CHD ENSG00000141101 | 16 | 27   | 7  | 4E+05 | 0.000308 | NOB1        | 0.0995300809836066 | 1 |
| COPD-CHD ENSG00000224997 | 14 | 2    | 1  | 4E+05 | 0.000282 | AL049840.1  | 0.0932078478571428 | 1 |
| COPD-CHD ENSG00000214655 | 10 | 6    | 2  | 4E+05 | 0.000279 | ZSWIM8      | 0.0932078478571428 | 1 |
| COPD-CHD ENSG00000041357 | 15 | 26   | 3  | 4E+05 | 0.000276 | PSMA4       | 0.0932078478571428 | 1 |
| COPD-CHD ENSG00000122194 | 6  | 130  | 12 | 4E+05 | 0.000267 | PLG         | 0.0930515964150944 | 1 |
| COPD-CHD ENSG00000254636 | 10 | 15   | 3  | 4E+05 | 0.000253 | ARMS2       | 0.0899089315384615 | 1 |
| COPD-CHD ENSG00000135074 | 5  | 646  | 30 | 4E+05 | 0.00024  | ADAM19      | 0.0870563531372549 | 1 |
| COPD-CHD ENSG00000121797 | 3  | 18   | 4  | 4E+05 | 0.000223 | CCRL2       | 0.082333027        | 1 |
| COPD-CHD ENSG00000088808 | 14 | 240  | 12 | 4E+05 | 0.000219 | PPP1R13B    | 0.082333027        | 1 |
| COPD-CHD ENSG00000164989 | 9  | 1445 | 16 | 4E+05 | 0.000206 | CCDC171     | 0.0795074477083333 | 1 |
| COPD-CHD ENSG00000126215 | 14 | 32   | 7  | 4E+05 | 0.000202 | XRCC3       | 0.0792831131914894 | 1 |
| COPD-CHD ENSG00000177096 | 22 | 11   | 3  | 4E+05 | 0.000173 | FAM109B     | 0.0694940017391304 | 1 |
| COPD-CHD ENSG00000197208 | 5  | 121  | 10 | 4E+05 | 0.000159 | SLC22A4     | 0.0651499566666667 | 1 |
| COPD-CHD ENSG00000204764 | 5  | 857  | 17 | 4E+05 | 0.00014  | RANBP17     | 0.058755153        | 1 |

|          |                 |    |     |    |       |            |              |                     |             |
|----------|-----------------|----|-----|----|-------|------------|--------------|---------------------|-------------|
| COPD-CHD | ENSG00000198198 | 1  | 84  | 7  | 4E+05 | 0.000127   | SZT2         | 0.054518348372093   | 1           |
| COPD-CHD | ENSG00000153774 | 16 | 491 | 15 | 4E+05 | 0.000116   | CFDP1        | 0.0512332778571429  | 1           |
| COPD-CHD | ENSG00000120693 | 13 | 176 | 23 | 4E+05 | 0.000103   | SMAD9        | 0.04625005          | 1           |
| COPD-CHD | ENSG00000272617 | 16 | 13  | 4  | 4E+05 | 0.000102   | RP11-343C2.1 | 0.04625005          | 1           |
| COPD-CHD | ENSG00000166822 | 16 | 92  | 9  | 4E+05 | 9.9684e-05 | TMEM170A     | 0.04625005          | 1           |
| COPD-CHD | ENSG00000213380 | 16 | 47  | 7  | 4E+05 | 9.1154e-05 | COG8         | 0.0443560161578947  | 1           |
| COPD-CHD | ENSG00000132604 | 16 | 84  | 14 | 4E+05 | 8.8066e-05 | TERF2        | 0.0440115785405405  | 1           |
| COPD-CHD | ENSG00000197375 | 5  | 84  | 8  | 4E+05 | 8.4584e-05 | SLC22A5      | 0.0434456317777778  | 1           |
| COPD-CHD | ENSG00000146477 | 6  | 214 | 16 | 4E+05 | 8.3719e-05 | SLC22A3      | 0.0434456317777778  | 1           |
| COPD-CHD | ENSG00000138663 | 4  | 49  | 9  | 4E+05 | 7.8234e-05 | COPS4        | 0.042547791         | 1           |
| COPD-CHD | ENSG00000117400 | 1  | 13  | 3  | 4E+05 | 7.0475e-05 | MPL          | 0.0394894916666667  | 1           |
| COPD-CHD | ENSG00000261717 | 16 | 204 | 11 | 4E+05 | 6.9525e-05 | RP11-77K12.1 | 0.0394894916666667  | 1           |
| COPD-CHD | ENSG00000066056 | 1  | 31  | 4  | 4E+05 | 6.3897e-05 | TIE1         | 0.0381135299032258  | 1           |
| COPD-CHD | ENSG00000167081 | 9  | 247 | 17 | 4E+05 | 5.5589e-05 | PBX3         | 0.0342632066333333  | 1           |
| COPD-CHD | ENSG00000132603 | 16 | 14  | 5  | 4E+05 | 4.3668e-05 | NIP7         | 0.0278436202758621  | 0.807464988 |
| COPD-CHD | ENSG00000259900 | 16 | 36  | 8  | 4E+05 | 3.0813e-05 | RP11-343C2.1 | 0.0203486851071429  | 0.569763183 |
| COPD-CHD | ENSG00000204775 | 8  | 1   | 1  | 4E+05 | 3.0266e-05 | KM-PA-2      | 0.0203486851071429  | 0.559648606 |
| COPD-CHD | ENSG00000058335 | 15 | 337 | 51 | 4E+05 | 2.9696e-05 | RASGRF1      | 0.0203486851071429  | 0.549108736 |
| COPD-CHD | ENSG00000256053 | 14 | 108 | 11 | 4E+05 | 2.7492e-05 | APOPT1       | 0.020334183         | 0.508354572 |
| COPD-CHD | ENSG00000260371 | 16 | 39  | 10 | 4E+05 | 2.5834e-05 | RP11-343C2.1 | 0.0199040205833333  | 0.477696494 |
| COPD-CHD | ENSG00000157315 | 16 | 19  | 7  | 4E+05 | 2.4691e-05 | TMED6        | 0.0198504904782609  | 0.456561281 |
| COPD-CHD | ENSG00000262039 | 17 | 253 | 36 | 4E+05 | 2.1939e-05 | RP11-81K2.1  | 0.01843973          | 0.405674049 |
| COPD-CHD | ENSG00000189308 | 4  | 209 | 9  | 4E+05 | 2.1573e-05 | LIN54        | 0.01843973          | 0.398906343 |
| COPD-CHD | ENSG00000169684 | 15 | 37  | 5  | 4E+05 | 2.0476e-05 | CHRNA5       | 0.01843973          | 0.378621716 |
| COPD-CHD | ENSG00000197536 | 5  | 185 | 18 | 4E+05 | 1.44e-05   | C5orf56      | 0.0140142315789474  | 0.2662704   |
| COPD-CHD | ENSG00000080644 | 15 | 44  | 4  | 4E+05 | 1.3801e-05 | CHRNA3       | 0.0140142315789474  | 0.255194291 |
| COPD-CHD | ENSG00000168152 | 4  | 37  | 4  | 4E+05 | 1.3254e-05 | THAP9        | 0.0140142315789474  | 0.245079714 |
| COPD-CHD | ENSG00000168802 | 16 | 29  | 10 | 4E+05 | 9.4108e-06 | CHTF8        | 0.010875944         | 0.174015103 |
| COPD-CHD | ENSG00000136378 | 15 | 104 | 15 | 4E+05 | 7.8011e-06 | ADAMTS7      | 0.00961667600666667 | 0.14425014  |
| COPD-CHD | ENSG00000166170 | 14 | 10  | 2  | 4E+05 | 6.6018e-06 | BAG5         | 0.00871956312857143 | 0.122073884 |
| COPD-CHD | ENSG00000101204 | 20 | 188 | 33 | 4E+05 | 2.5133e-06 | CHRNA4       | 0.00357487925384615 | 0.04647343  |
| COPD-CHD | ENSG00000130208 | 19 | 12  | 5  | 4E+05 | 2.2231e-06 | APOC1        | 0.00342561184166667 | 0.041107342 |
| COPD-CHD | ENSG00000168807 | 16 | 229 | 21 | 4E+05 | 1.5852e-06 | SNTB2        | 0.002664721         | 0.029311933 |

|          |                 |    |      |    |       |            |               |                      |                 |
|----------|-----------------|----|------|----|-------|------------|---------------|----------------------|-----------------|
| COPD-CHD | ENSG00000132612 | 16 | 37   | 7  | 4E+05 | 1.5684e-06 | VPS4A         | 0.002664721          | 0.029001284     |
| COPD-CHD | ENSG00000141076 | 16 | 172  | 21 | 4E+05 | 1.3979e-06 | CIRH1A        | 0.002664721          | 0.025848569     |
| COPD-CHD | ENSG00000130204 | 19 | 50   | 10 | 4E+05 | 1.0888e-06 | TOMM40        | 0.002516625          | 0.020133001     |
| COPD-CHD | ENSG00000260914 | 16 | 39   | 6  | 4E+05 | 8.4901e-07 | RP11-343C2.10 | 0.00224272055857143  | 0.015699044     |
| COPD-CHD | ENSG00000168487 | 8  | 140  | 20 | 4E+05 | 2.3328e-07 | BMP1          | 0.00071893           | 0.00431358      |
| COPD-CHD | ENSG00000117971 | 15 | 174  | 20 | 4E+05 | 4.4206e-08 | CHRN4         | 0.0001634826292      | 0.000817413     |
| COPD-CHD | ENSG00000198740 | 17 | 154  | 13 | 4E+05 | 4.3905e-08 | ZNF652        | 0.0001634826292      | 0.000811847     |
| COPD-CHD | ENSG00000130203 | 19 | 5    | 2  | 4E+05 | 6.985e-09  | APOE          | 4.30532116666667e-05 | 0.00012916      |
| COPD-CHD | ENSG00000136381 | 15 | 63   | 10 | 4E+05 | 5.9374e-09 | IREB2         | 4.30532116666667e-05 | 0.0001097884634 |
| COPD-CHD | ENSG00000185787 | 15 | 343  | 16 | 4E+05 | 9.3726e-10 | MORF4L1       | 1.733087466e-05      | 1.733087466e-05 |
| COPD-HTN | ENSG0000007129  | 19 | 47   | 7  | 5E+05 | 0.049955   | CEACAM21      | 0.535473852515905    | 1               |
| COPD-HTN | ENSG00000113851 | 3  | 92   | 14 | 5E+05 | 0.049818   | CRBN          | 0.534825389633081    | 1               |
| COPD-HTN | ENSG00000221914 | 8  | 166  | 24 | 5E+05 | 0.049767   | PPP2R2A       | 0.534589225524476    | 1               |
| COPD-HTN | ENSG00000100325 | 22 | 126  | 14 | 5E+05 | 0.049748   | ASCC2         | 0.534589225524476    | 1               |
| COPD-HTN | ENSG00000135972 | 2  | 206  | 7  | 5E+05 | 0.049686   | MRPS9         | 0.534341912485414    | 1               |
| COPD-HTN | ENSG00000100523 | 14 | 154  | 10 | 5E+05 | 0.049576   | DDHD1         | 0.533470173963806    | 1               |
| COPD-HTN | ENSG00000156282 | 21 | 1    | 1  | 5E+05 | 0.049569   | CLDN17        | 0.533470173963806    | 1               |
| COPD-HTN | ENSG00000115556 | 2  | 42   | 5  | 5E+05 | 0.049508   | PLCD4         | 0.533361171244886    | 1               |
| COPD-HTN | ENSG00000205531 | 11 | 150  | 15 | 5E+05 | 0.049427   | NAP1L4        | 0.53279993625731     | 1               |
| COPD-HTN | ENSG00000250067 | 19 | 35   | 3  | 5E+05 | 0.049426   | YJEFN3        | 0.53279993625731     | 1               |
| COPD-HTN | ENSG00000080823 | 14 | 188  | 16 | 5E+05 | 0.049414   | MOK           | 0.53279993625731     | 1               |
| COPD-HTN | ENSG00000120318 | 5  | 74   | 16 | 5E+05 | 0.049376   | ARAP3         | 0.53279993625731     | 1               |
| COPD-HTN | ENSG00000169855 | 3  | 2245 | 84 | 5E+05 | 0.049365   | ROBO1         | 0.53279993625731     | 1               |
| COPD-HTN | ENSG00000110321 | 11 | 23   | 5  | 5E+05 | 0.049334   | EIF4G2        | 0.53279993625731     | 1               |
| COPD-HTN | ENSG00000187323 | 18 | 4020 | 98 | 5E+05 | 0.049304   | DCC           | 0.53279993625731     | 1               |
| COPD-HTN | ENSG00000186453 | 2  | 72   | 11 | 5E+05 | 0.049266   | FAM228A       | 0.53279993625731     | 1               |
| COPD-HTN | ENSG00000091129 | 7  | 985  | 46 | 5E+05 | 0.049204   | NRCAM         | 0.53279993625731     | 1               |
| COPD-HTN | ENSG00000231880 | 11 | 1    | 1  | 5E+05 | 0.049195   | KBTBD4        | 0.53279993625731     | 1               |
| COPD-HTN | ENSG00000243232 | 5  | 49   | 11 | 5E+05 | 0.049188   | PCDHAC2       | 0.53279993625731     | 1               |
| COPD-HTN | ENSG00000184497 | 13 | 150  | 14 | 5E+05 | 0.049184   | TMEM255B      | 0.53279993625731     | 1               |
| COPD-HTN | ENSG00000176444 | 1  | 15   | 3  | 5E+05 | 0.049157   | CLK2          | 0.53279993625731     | 1               |
| COPD-HTN | ENSG00000153563 | 2  | 67   | 6  | 5E+05 | 0.04915    | CD8A          | 0.53279993625731     | 1               |
| COPD-HTN | ENSG00000181656 | 1  | 8    | 3  | 5E+05 | 0.049145   | GPR88         | 0.53279993625731     | 1               |

|          |                 |    |     |    |       |          |             |                   |   |
|----------|-----------------|----|-----|----|-------|----------|-------------|-------------------|---|
| COPD-HTN | ENSG0000064607  | 19 | 75  | 8  | 5E+05 | 0.049118 | SUGP2       | 0.53279993625731  | 1 |
| COPD-HTN | ENSG00000162039 | 16 | 318 | 6  | 5E+05 | 0.049096 | MEIOB       | 0.53279993625731  | 1 |
| COPD-HTN | ENSG00000170185 | 4  | 75  | 6  | 5E+05 | 0.049086 | USP38       | 0.53279993625731  | 1 |
| COPD-HTN | ENSG00000161016 | 8  | 4   | 2  | 5E+05 | 0.049035 | RPL8        | 0.53279993625731  | 1 |
| COPD-HTN | ENSG00000111885 | 6  | 616 | 25 | 5E+05 | 0.048953 | MAN1A1      | 0.53279993625731  | 1 |
| COPD-HTN | ENSG00000172375 | 11 | 41  | 8  | 5E+05 | 0.048945 | C2CD2L      | 0.53279993625731  | 1 |
| COPD-HTN | ENSG0000016082  | 5  | 18  | 7  | 5E+05 | 0.048925 | ISL1        | 0.53279993625731  | 1 |
| COPD-HTN | ENSG00000174442 | 15 | 129 | 15 | 5E+05 | 0.048911 | ZWILCH      | 0.53279993625731  | 1 |
| COPD-HTN | ENSG00000140263 | 15 | 50  | 10 | 5E+05 | 0.04889  | SORD        | 0.53279993625731  | 1 |
| COPD-HTN | ENSG00000035681 | 8  | 130 | 11 | 5E+05 | 0.048869 | NSMAF       | 0.53279993625731  | 1 |
| COPD-HTN | ENSG00000072134 | 17 | 63  | 9  | 5E+05 | 0.048795 | EPN2        | 0.53279993625731  | 1 |
| COPD-HTN | ENSG00000173421 | 3  | 67  | 8  | 5E+05 | 0.048757 | CCDC36      | 0.53279993625731  | 1 |
| COPD-HTN | ENSG00000138777 | 4  | 360 | 17 | 5E+05 | 0.048674 | PPA2        | 0.53279993625731  | 1 |
| COPD-HTN | ENSG00000139970 | 14 | 451 | 22 | 5E+05 | 0.048642 | RTN1        | 0.53279993625731  | 1 |
| COPD-HTN | ENSG00000003756 | 3  | 28  | 6  | 5E+05 | 0.04859  | RBM5        | 0.53279993625731  | 1 |
| COPD-HTN | ENSG00000068784 | 2  | 608 | 26 | 5E+05 | 0.048551 | SRBD1       | 0.53270272797619  | 1 |
| COPD-HTN | ENSG00000114302 | 3  | 64  | 9  | 5E+05 | 0.048457 | PRKAR2A     | 0.531988017272186 | 1 |
| COPD-HTN | ENSG00000162413 | 1  | 42  | 9  | 5E+05 | 0.048445 | KLHL21      | 0.531988017272186 | 1 |
| COPD-HTN | ENSG00000183765 | 22 | 118 | 17 | 5E+05 | 0.048441 | CHEK2       | 0.531988017272186 | 1 |
| COPD-HTN | ENSG00000198398 | 3  | 66  | 14 | 5E+05 | 0.048435 | TMEM207     | 0.531988017272186 | 1 |
| COPD-HTN | ENSG00000125538 | 2  | 14  | 4  | 5E+05 | 0.048221 | IL1B        | 0.530661309253731 | 1 |
| COPD-HTN | ENSG00000109680 | 4  | 162 | 8  | 5E+05 | 0.048216 | TBC1D19     | 0.530661309253731 | 1 |
| COPD-HTN | ENSG00000257767 | 12 | 23  | 3  | 5E+05 | 0.048136 | RP11-162P23 | 0.530359167961745 | 1 |
| COPD-HTN | ENSG00000182326 | 12 | 124 | 11 | 5E+05 | 0.048012 | C1S         | 0.529309327751196 | 1 |
| COPD-HTN | ENSG00000205436 | 14 | 25  | 5  | 5E+05 | 0.047916 | EXOC3L4     | 0.528567102333932 | 1 |
| COPD-HTN | ENSG00000159761 | 16 | 1   | 1  | 5E+05 | 0.04791  | C16orf86    | 0.528567102333932 | 1 |
| COPD-HTN | ENSG00000197016 | 19 | 62  | 6  | 5E+05 | 0.047905 | ZNF470      | 0.528567102333932 | 1 |
| COPD-HTN | ENSG00000146374 | 6  | 130 | 10 | 5E+05 | 0.047866 | RSPO3       | 0.528567102333932 | 1 |
| COPD-HTN | ENSG00000143994 | 2  | 8   | 2  | 5E+05 | 0.047856 | ABHD1       | 0.528567102333932 | 1 |
| COPD-HTN | ENSG00000255582 | 14 | 2   | 1  | 5E+05 | 0.047815 | OR10G2      | 0.528567102333932 | 1 |
| COPD-HTN | ENSG00000180113 | 6  | 11  | 5  | 5E+05 | 0.047793 | TDRD6       | 0.528567102333932 | 1 |
| COPD-HTN | ENSG00000189079 | 12 | 122 | 16 | 5E+05 | 0.047779 | ARID2       | 0.528567102333932 | 1 |
| COPD-HTN | ENSG00000078304 | 14 | 394 | 38 | 5E+05 | 0.047761 | PPP2R5C     | 0.528567102333932 | 1 |

|          |                 |    |      |     |       |          |              |                   |   |
|----------|-----------------|----|------|-----|-------|----------|--------------|-------------------|---|
| COPD-HTN | ENSG00000138399 | 2  | 109  | 17  | 5E+05 | 0.047755 | FASTKD1      | 0.528567102333932 | 1 |
| COPD-HTN | ENSG00000259164 | 14 | 370  | 37  | 5E+05 | 0.047732 | RP11-463C8.4 | 0.528567102333932 | 1 |
| COPD-HTN | ENSG00000244537 | 17 | 5    | 2   | 5E+05 | 0.047698 | KRTAP4-2     | 0.528567102333932 | 1 |
| COPD-HTN | ENSG00000136816 | 9  | 15   | 3   | 5E+05 | 0.047663 | TOR1B        | 0.528567102333932 | 1 |
| COPD-HTN | ENSG00000123178 | 13 | 40   | 6   | 5E+05 | 0.047608 | SPRYD7       | 0.528567102333932 | 1 |
| COPD-HTN | ENSG00000188580 | 6  | 2555 | 186 | 5E+05 | 0.047591 | NKAIN2       | 0.528567102333932 | 1 |
| COPD-HTN | ENSG00000168116 | 6  | 6    | 2   | 5E+05 | 0.04752  | KIAA1586     | 0.528567102333932 | 1 |
| COPD-HTN | ENSG00000135913 | 2  | 184  | 9   | 5E+05 | 0.047518 | USP37        | 0.528567102333932 | 1 |
| COPD-HTN | ENSG00000081818 | 5  | 10   | 3   | 5E+05 | 0.047517 | PCDHB4       | 0.528567102333932 | 1 |
| COPD-HTN | ENSG00000196683 | 7  | 61   | 8   | 5E+05 | 0.04745  | TOMM7        | 0.528567102333932 | 1 |
| COPD-HTN | ENSG00000196381 | 19 | 53   | 9   | 5E+05 | 0.047395 | ZNF781       | 0.528567102333932 | 1 |
| COPD-HTN | ENSG00000248487 | 3  | 10   | 6   | 5E+05 | 0.047378 | ABHD14A      | 0.528567102333932 | 1 |
| COPD-HTN | ENSG00000070540 | 17 | 93   | 16  | 5E+05 | 0.04727  | WIPI1        | 0.528077521212121 | 1 |
| COPD-HTN | ENSG00000072571 | 5  | 69   | 9   | 5E+05 | 0.04726  | HMMR         | 0.528077521212121 | 1 |
| COPD-HTN | ENSG00000198556 | 7  | 36   | 10  | 5E+05 | 0.047226 | ZNF789       | 0.528077521212121 | 1 |
| COPD-HTN | ENSG00000060642 | 1  | 12   | 4   | 5E+05 | 0.047168 | PIGV         | 0.52789784092289  | 1 |
| COPD-HTN | ENSG00000000971 | 1  | 208  | 14  | 5E+05 | 0.047152 | CFH          | 0.52789784092289  | 1 |
| COPD-HTN | ENSG00000116521 | 1  | 6    | 1   | 5E+05 | 0.047034 | SCAMP3       | 0.52703812887538  | 1 |
| COPD-HTN | ENSG00000139718 | 12 | 34   | 5   | 5E+05 | 0.047008 | SETD1B       | 0.52703812887538  | 1 |
| COPD-HTN | ENSG00000102901 | 16 | 18   | 3   | 5E+05 | 0.047008 | CENPT        | 0.52703812887538  | 1 |
| COPD-HTN | ENSG00000006788 | 17 | 238  | 29  | 5E+05 | 0.046891 | MYH13        | 0.526395738733252 | 1 |
| COPD-HTN | ENSG00000106799 | 9  | 82   | 9   | 5E+05 | 0.046881 | TGFBR1       | 0.526395738733252 | 1 |
| COPD-HTN | ENSG00000184076 | 22 | 5    | 2   | 5E+05 | 0.046748 | UQCR10       | 0.525430417073171 | 1 |
| COPD-HTN | ENSG00000128250 | 22 | 11   | 2   | 5E+05 | 0.046716 | RFPL1        | 0.525391109212935 | 1 |
| COPD-HTN | ENSG00000157741 | 7  | 107  | 12  | 5E+05 | 0.046704 | UBN2         | 0.525391109212935 | 1 |
| COPD-HTN | ENSG00000188321 | 19 | 55   | 5   | 5E+05 | 0.046585 | ZNF559       | 0.52455791386683  | 1 |
| COPD-HTN | ENSG00000166188 | 16 | 12   | 4   | 5E+05 | 0.046543 | ZNF319       | 0.524405329462103 | 1 |
| COPD-HTN | ENSG00000188322 | 16 | 35   | 11  | 5E+05 | 0.046518 | SBK1         | 0.524405329462103 | 1 |
| COPD-HTN | ENSG00000181371 | 11 | 1    | 1   | 5E+05 | 0.046472 | OR5M8        | 0.524246252141983 | 1 |
| COPD-HTN | ENSG00000196345 | 3  | 59   | 6   | 5E+05 | 0.046412 | ZKSCAN7      | 0.523890015921617 | 1 |
| COPD-HTN | ENSG00000162241 | 11 | 10   | 4   | 5E+05 | 0.046292 | SLC25A45     | 0.522855659313725 | 1 |
| COPD-HTN | ENSG00000139410 | 12 | 21   | 3   | 5E+05 | 0.046231 | SDSL         | 0.522486832004905 | 1 |
| COPD-HTN | ENSG00000129347 | 19 | 50   | 8   | 5E+05 | 0.046215 | KRI1         | 0.522486832004905 | 1 |

|          |                 |    |     |    |       |          |              |                   |   |
|----------|-----------------|----|-----|----|-------|----------|--------------|-------------------|---|
| COPD-HTN | ENSG00000179965 | 16 | 19  | 6  | 5E+05 | 0.046179 | ZNF771       | 0.522486832004905 | 1 |
| COPD-HTN | ENSG00000108582 | 17 | 94  | 8  | 5E+05 | 0.046152 | CPD          | 0.522486832004905 | 1 |
| COPD-HTN | ENSG00000174173 | 3  | 12  | 5  | 5E+05 | 0.046026 | TRMT10C      | 0.52144883712354  | 1 |
| COPD-HTN | ENSG00000143476 | 1  | 216 | 23 | 5E+05 | 0.046025 | DTL          | 0.52144883712354  | 1 |
| COPD-HTN | ENSG00000206181 | 18 | 9   | 3  | 5E+05 | 0.045941 | TCEB3B       | 0.521126432615385 | 1 |
| COPD-HTN | ENSG00000245680 | 19 | 49  | 10 | 5E+05 | 0.04593  | ZNF585B      | 0.521126432615385 | 1 |
| COPD-HTN | ENSG00000105879 | 7  | 28  | 4  | 5E+05 | 0.045916 | CBLL1        | 0.521126432615385 | 1 |
| COPD-HTN | ENSG00000176208 | 17 | 120 | 6  | 5E+05 | 0.045803 | ATAD5        | 0.520522009247842 | 1 |
| COPD-HTN | ENSG00000273303 | 3  | 49  | 5  | 5E+05 | 0.045799 | RP11-944L7.5 | 0.520522009247842 | 1 |
| COPD-HTN | ENSG00000103769 | 15 | 295 | 20 | 5E+05 | 0.045777 | RAB11A       | 0.520522009247842 | 1 |
| COPD-HTN | ENSG00000262601 | 16 | 58  | 14 | 5E+05 | 0.045708 | CTC-786C10   | 0.520404919085856 | 1 |
| COPD-HTN | ENSG00000148600 | 10 | 79  | 12 | 5E+05 | 0.045683 | CDHR1        | 0.520404919085856 | 1 |
| COPD-HTN | ENSG00000172489 | 11 | 1   | 1  | 5E+05 | 0.045683 | OR5T3        | 0.520404919085856 | 1 |
| COPD-HTN | ENSG00000101546 | 18 | 40  | 5  | 5E+05 | 0.045627 | RBFA         | 0.520404919085856 | 1 |
| COPD-HTN | ENSG00000181785 | 11 | 5   | 1  | 5E+05 | 0.045622 | OR5AS1       | 0.520404919085856 | 1 |
| COPD-HTN | ENSG00000162148 | 11 | 13  | 4  | 5E+05 | 0.045603 | PPP1R32      | 0.520404919085856 | 1 |
| COPD-HTN | ENSG00000135973 | 2  | 1   | 1  | 5E+05 | 0.045506 | GPR45        | 0.520032298822071 | 1 |
| COPD-HTN | ENSG00000130589 | 20 | 65  | 14 | 5E+05 | 0.04547  | HELZ2        | 0.519943244416874 | 1 |
| COPD-HTN | ENSG00000112667 | 6  | 5   | 3  | 5E+05 | 0.045346 | DNPH1        | 0.518847186840472 | 1 |
| COPD-HTN | ENSG00000064933 | 2  | 169 | 17 | 5E+05 | 0.045344 | PMS1         | 0.518847186840472 | 1 |
| COPD-HTN | ENSG00000255394 | 8  | 11  | 4  | 5E+05 | 0.045272 | C8orf49      | 0.518644360472343 | 1 |
| COPD-HTN | ENSG00000164694 | 6  | 345 | 14 | 5E+05 | 0.045247 | FNDC1        | 0.518644360472343 | 1 |
| COPD-HTN | ENSG00000154856 | 18 | 115 | 16 | 5E+05 | 0.045219 | APCDD1       | 0.518644360472343 | 1 |
| COPD-HTN | ENSG00000228259 | 5  | 2   | 1  | 5E+05 | 0.045177 | AC136604.1   | 0.518522815068493 | 1 |
| COPD-HTN | ENSG00000100170 | 22 | 166 | 9  | 5E+05 | 0.045176 | SLC5A1       | 0.518522815068493 | 1 |
| COPD-HTN | ENSG00000073861 | 17 | 39  | 8  | 5E+05 | 0.045102 | TBX21        | 0.518307460099751 | 1 |
| COPD-HTN | ENSG00000162676 | 1  | 20  | 5  | 5E+05 | 0.044966 | GFI1         | 0.517066923268871 | 1 |
| COPD-HTN | ENSG00000137812 | 15 | 125 | 11 | 5E+05 | 0.044957 | CASC5        | 0.517066923268871 | 1 |
| COPD-HTN | ENSG00000174939 | 16 | 20  | 5  | 5E+05 | 0.044926 | ASPHD1       | 0.517066923268871 | 1 |
| COPD-HTN | ENSG00000151838 | 14 | 227 | 17 | 5E+05 | 0.044857 | CCDC175      | 0.516780676       | 1 |
| COPD-HTN | ENSG00000064886 | 1  | 134 | 18 | 5E+05 | 0.044806 | CHI3L2       | 0.516515946216385 | 1 |
| COPD-HTN | ENSG00000116209 | 1  | 29  | 6  | 5E+05 | 0.044803 | TMEM59       | 0.516515946216385 | 1 |
| COPD-HTN | ENSG00000170946 | 11 | 81  | 9  | 5E+05 | 0.044779 | DNAJC24      | 0.516515946216385 | 1 |

|          |                 |    |     |    |       |          |              |                   |   |
|----------|-----------------|----|-----|----|-------|----------|--------------|-------------------|---|
| COPD-HTN | ENSG00000204021 | 10 | 146 | 8  | 5E+05 | 0.044705 | LIPK         | 0.516320341478697 | 1 |
| COPD-HTN | ENSG00000157330 | 1  | 32  | 7  | 5E+05 | 0.044573 | C1orf158     | 0.515118563636364 | 1 |
| COPD-HTN | ENSG00000023572 | 1  | 12  | 4  | 5E+05 | 0.044552 | GLRX2        | 0.515118563636364 | 1 |
| COPD-HTN | ENSG00000157119 | 3  | 8   | 3  | 5E+05 | 0.044538 | KLHL40       | 0.515118563636364 | 1 |
| COPD-HTN | ENSG00000144560 | 3  | 535 | 39 | 5E+05 | 0.04452  | VGLL4        | 0.515118563636364 | 1 |
| COPD-HTN | ENSG00000115042 | 2  | 6   | 3  | 5E+05 | 0.044511 | FAHD2A       | 0.515118563636364 | 1 |
| COPD-HTN | ENSG00000102871 | 16 | 3   | 1  | 5E+05 | 0.044504 | TRADD        | 0.515118563636364 | 1 |
| COPD-HTN | ENSG00000180340 | 17 | 1   | 1  | 5E+05 | 0.0444   | FZD2         | 0.515056765261171 | 1 |
| COPD-HTN | ENSG00000254440 | 6  | 10  | 2  | 5E+05 | 0.044262 | PBOV1        | 0.513779248110831 | 1 |
| COPD-HTN | ENSG00000113525 | 5  | 12  | 2  | 5E+05 | 0.044254 | IL5          | 0.513779248110831 | 1 |
| COPD-HTN | ENSG00000151148 | 12 | 145 | 17 | 5E+05 | 0.044217 | UBE3B        | 0.513779248110831 | 1 |
| COPD-HTN | ENSG00000129235 | 17 | 16  | 4  | 5E+05 | 0.044184 | TXNDC17      | 0.513779248110831 | 1 |
| COPD-HTN | ENSG00000174444 | 15 | 79  | 12 | 5E+05 | 0.04418  | RPL4         | 0.513779248110831 | 1 |
| COPD-HTN | ENSG00000137494 | 11 | 119 | 13 | 5E+05 | 0.043936 | ANKRD42      | 0.511605993682881 | 1 |
| COPD-HTN | ENSG00000112658 | 6  | 11  | 3  | 5E+05 | 0.043926 | SRF          | 0.511605993682881 | 1 |
| COPD-HTN | ENSG00000236609 | 7  | 22  | 5  | 5E+05 | 0.043864 | ZNF853       | 0.511413733080329 | 1 |
| COPD-HTN | ENSG00000140374 | 15 | 178 | 12 | 5E+05 | 0.043673 | ETFPA        | 0.509509119620253 | 1 |
| COPD-HTN | ENSG00000112659 | 6  | 79  | 10 | 5E+05 | 0.043621 | CUL9         | 0.509224758074731 | 1 |
| COPD-HTN | ENSG00000183090 | 4  | 207 | 18 | 5E+05 | 0.043611 | FREM3        | 0.509224758074731 | 1 |
| COPD-HTN | ENSG00000125459 | 1  | 99  | 13 | 5E+05 | 0.043455 | MSTO1        | 0.507930256816741 | 1 |
| COPD-HTN | ENSG00000144580 | 2  | 46  | 4  | 5E+05 | 0.043451 | RQCD1        | 0.507930256816741 | 1 |
| COPD-HTN | ENSG00000110906 | 12 | 119 | 10 | 5E+05 | 0.043379 | KCTD10       | 0.507685782222222 | 1 |
| COPD-HTN | ENSG00000270011 | 19 | 117 | 6  | 5E+05 | 0.043319 | ZNF559-ZNF10 | 0.507305671537484 | 1 |
| COPD-HTN | ENSG00000109519 | 4  | 23  | 3  | 5E+05 | 0.043247 | GRPEL1       | 0.506784457088366 | 1 |
| COPD-HTN | ENSG00000184056 | 15 | 69  | 10 | 5E+05 | 0.043234 | VPS33B       | 0.506784457088366 | 1 |
| COPD-HTN | ENSG00000181761 | 11 | 13  | 3  | 5E+05 | 0.043182 | OR8H3        | 0.506666967536601 | 1 |
| COPD-HTN | ENSG00000170848 | 19 | 55  | 8  | 5E+05 | 0.043173 | PSG6         | 0.506666967536601 | 1 |
| COPD-HTN | ENSG00000188629 | 19 | 115 | 6  | 5E+05 | 0.043165 | ZNF177       | 0.506666967536601 | 1 |
| COPD-HTN | ENSG00000105329 | 19 | 91  | 12 | 5E+05 | 0.043125 | TGFB1        | 0.506666967536601 | 1 |
| COPD-HTN | ENSG00000105676 | 19 | 53  | 8  | 5E+05 | 0.043065 | ARMC6        | 0.506584010848756 | 1 |
| COPD-HTN | ENSG00000156671 | 10 | 150 | 15 | 5E+05 | 0.04306  | SAMD8        | 0.506584010848756 | 1 |
| COPD-HTN | ENSG00000109458 | 4  | 221 | 26 | 5E+05 | 0.042999 | GAB1         | 0.506454036421725 | 1 |
| COPD-HTN | ENSG00000143167 | 1  | 106 | 17 | 5E+05 | 0.042985 | GPA33        | 0.506454036421725 | 1 |

|          |                 |    |      |    |       |          |          |                   |   |
|----------|-----------------|----|------|----|-------|----------|----------|-------------------|---|
| COPD-HTN | ENSG00000108244 | 17 | 52   | 7  | 5E+05 | 0.042949 | KRT23    | 0.506454036421725 | 1 |
| COPD-HTN | ENSG00000075213 | 7  | 1503 | 65 | 5E+05 | 0.042906 | SEMA3A   | 0.506329256081946 | 1 |
| COPD-HTN | ENSG00000130307 | 19 | 100  | 16 | 5E+05 | 0.042864 | USHBP1   | 0.506157663036515 | 1 |
| COPD-HTN | ENSG00000214367 | 4  | 32   | 4  | 5E+05 | 0.042818 | HAUS3    | 0.505938585897436 | 1 |
| COPD-HTN | ENSG00000253293 | 7  | 9    | 3  | 5E+05 | 0.042817 | HOXA10   | 0.505938585897436 | 1 |
| COPD-HTN | ENSG00000079435 | 19 | 11   | 4  | 5E+05 | 0.042813 | LIPE     | 0.505938585897436 | 1 |
| COPD-HTN | ENSG00000178966 | 9  | 32   | 5  | 5E+05 | 0.042726 | RMI1     | 0.505824250481696 | 1 |
| COPD-HTN | ENSG00000124467 | 19 | 265  | 14 | 5E+05 | 0.04271  | PSG8     | 0.505824250481696 | 1 |
| COPD-HTN | ENSG00000136738 | 10 | 292  | 15 | 5E+05 | 0.042705 | STAM     | 0.505824250481696 | 1 |
| COPD-HTN | ENSG00000131504 | 5  | 154  | 23 | 5E+05 | 0.04262  | DIAPH1   | 0.505543410553411 | 1 |
| COPD-HTN | ENSG00000179761 | 17 | 165  | 32 | 5E+05 | 0.042512 | PIPOX    | 0.504587054732775 | 1 |
| COPD-HTN | ENSG00000180479 | 19 | 77   | 10 | 5E+05 | 0.042436 | ZNF571   | 0.504009528350515 | 1 |
| COPD-HTN | ENSG00000198169 | 8  | 37   | 10 | 5E+05 | 0.042386 | ZNF251   | 0.50374025660864  | 1 |
| COPD-HTN | ENSG00000132801 | 20 | 66   | 7  | 5E+05 | 0.042369 | ZSWIM3   | 0.50374025660864  | 1 |
| COPD-HTN | ENSG00000075884 | 2  | 1387 | 80 | 5E+05 | 0.042357 | ARHGAP15 | 0.50374025660864  | 1 |
| COPD-HTN | ENSG00000241058 | 10 | 344  | 16 | 5E+05 | 0.04231  | NSUN6    | 0.50374025660864  | 1 |
| COPD-HTN | ENSG00000076513 | 12 | 69   | 12 | 5E+05 | 0.04226  | ANKRD13A | 0.503541422107305 | 1 |
| COPD-HTN | ENSG00000189320 | 7  | 50   | 9  | 5E+05 | 0.042232 | FAM180A  | 0.503533283311772 | 1 |
| COPD-HTN | ENSG00000051825 | 12 | 213  | 9  | 5E+05 | 0.04218  | MPHOSPH9 | 0.503238796116505 | 1 |
| COPD-HTN | ENSG00000181752 | 11 | 1    | 1  | 5E+05 | 0.042117 | OR8K5    | 0.502812604274611 | 1 |
| COPD-HTN | ENSG00000134987 | 5  | 100  | 11 | 5E+05 | 0.042116 | WDR36    | 0.502812604274611 | 1 |
| COPD-HTN | ENSG00000172171 | 17 | 19   | 2  | 5E+05 | 0.042075 | TEFM     | 0.502812604274611 | 1 |
| COPD-HTN | ENSG00000160917 | 7  | 37   | 6  | 5E+05 | 0.041996 | CPSF4    | 0.5023441064244   | 1 |
| COPD-HTN | ENSG00000149925 | 16 | 10   | 4  | 5E+05 | 0.041935 | ALDOA    | 0.501940165584416 | 1 |
| COPD-HTN | ENSG00000180185 | 16 | 116  | 3  | 5E+05 | 0.041876 | FAHD1    | 0.501559654320988 | 1 |
| COPD-HTN | ENSG00000131951 | 14 | 237  | 12 | 5E+05 | 0.041865 | LRRC9    | 0.501559654320988 | 1 |
| COPD-HTN | ENSG00000197714 | 19 | 39   | 7  | 5E+05 | 0.041853 | ZNF460   | 0.501559654320988 | 1 |
| COPD-HTN | ENSG00000225828 | 1  | 1    | 1  | 5E+05 | 0.041829 | FAM229A  | 0.501559654320988 | 1 |
| COPD-HTN | ENSG00000126602 | 16 | 177  | 27 | 5E+05 | 0.041819 | TRAP1    | 0.501559654320988 | 1 |
| COPD-HTN | ENSG00000169504 | 1  | 80   | 8  | 5E+05 | 0.041818 | CLIC4    | 0.501559654320988 | 1 |
| COPD-HTN | ENSG00000038274 | 5  | 34   | 7  | 5E+05 | 0.041761 | MAT2B    | 0.501559654320988 | 1 |
| COPD-HTN | ENSG00000186866 | 21 | 52   | 5  | 5E+05 | 0.041742 | POFUT2   | 0.501559654320988 | 1 |
| COPD-HTN | ENSG00000099377 | 16 | 7    | 2  | 5E+05 | 0.041709 | HSD3B7   | 0.501559654320988 | 1 |

|          |                 |    |     |    |       |          |          |                   |   |
|----------|-----------------|----|-----|----|-------|----------|----------|-------------------|---|
| COPD-HTN | ENSG00000147955 | 9  | 6   | 3  | 5E+05 | 0.0417   | SIGMAR1  | 0.501559654320988 | 1 |
| COPD-HTN | ENSG00000149654 | 20 | 269 | 33 | 5E+05 | 0.04166  | CDH22    | 0.501559654320988 | 1 |
| COPD-HTN | ENSG00000132911 | 5  | 143 | 6  | 5E+05 | 0.041657 | NMUR2    | 0.501559654320988 | 1 |
| COPD-HTN | ENSG00000100151 | 22 | 32  | 7  | 5E+05 | 0.041631 | PICK1    | 0.501559654320988 | 1 |
| COPD-HTN | ENSG00000153561 | 2  | 60  | 7  | 5E+05 | 0.041579 | RMND5A   | 0.501559654320988 | 1 |
| COPD-HTN | ENSG00000122194 | 6  | 118 | 11 | 5E+05 | 0.041548 | PLG      | 0.501559654320988 | 1 |
| COPD-HTN | ENSG00000160307 | 21 | 27  | 6  | 5E+05 | 0.041548 | S100B    | 0.501559654320988 | 1 |
| COPD-HTN | ENSG00000179292 | 11 | 6   | 3  | 5E+05 | 0.041419 | TMEM151A | 0.501297719632305 | 1 |
| COPD-HTN | ENSG00000100197 | 22 | 10  | 5  | 5E+05 | 0.041399 | CYP2D6   | 0.501297719632305 | 1 |
| COPD-HTN | ENSG00000165699 | 9  | 94  | 12 | 5E+05 | 0.041388 | TSC1     | 0.501297719632305 | 1 |
| COPD-HTN | ENSG00000126773 | 14 | 174 | 6  | 5E+05 | 0.041376 | PCNXL4   | 0.501297719632305 | 1 |
| COPD-HTN | ENSG00000130775 | 1  | 46  | 9  | 5E+05 | 0.04137  | THEMIS2  | 0.501297719632305 | 1 |
| COPD-HTN | ENSG00000170266 | 3  | 306 | 26 | 5E+05 | 0.041365 | GLB1     | 0.501297719632305 | 1 |
| COPD-HTN | ENSG00000141696 | 17 | 24  | 4  | 5E+05 | 0.041186 | LEPREL4  | 0.500449266974291 | 1 |
| COPD-HTN | ENSG00000177875 | 12 | 4   | 2  | 5E+05 | 0.041168 | C12orf68 | 0.500449266974291 | 1 |
| COPD-HTN | ENSG00000103740 | 15 | 227 | 41 | 5E+05 | 0.041113 | ACSBG1   | 0.500221735313531 | 1 |
| COPD-HTN | ENSG00000177125 | 9  | 25  | 7  | 5E+05 | 0.041077 | ZBTB34   | 0.500113831571995 | 1 |
| COPD-HTN | ENSG00000134884 | 13 | 25  | 7  | 5E+05 | 0.041017 | ARGLU1   | 0.499713391275611 | 1 |
| COPD-HTN | ENSG00000061918 | 4  | 114 | 21 | 5E+05 | 0.041005 | GUCY1B3  | 0.499713391275611 | 1 |
| COPD-HTN | ENSG00000120616 | 10 | 242 | 17 | 5E+05 | 0.040983 | EPC1     | 0.499713391275611 | 1 |
| COPD-HTN | ENSG00000186174 | 11 | 44  | 13 | 5E+05 | 0.040974 | BCL9L    | 0.499713391275611 | 1 |
| COPD-HTN | ENSG00000149923 | 16 | 10  | 3  | 5E+05 | 0.040941 | PPP4C    | 0.499713391275611 | 1 |
| COPD-HTN | ENSG00000152133 | 2  | 32  | 5  | 5E+05 | 0.040883 | GPATCH11 | 0.499713391275611 | 1 |
| COPD-HTN | ENSG00000144452 | 2  | 354 | 39 | 5E+05 | 0.040706 | ABCA12   | 0.497898936960849 | 1 |
| COPD-HTN | ENSG00000137817 | 15 | 39  | 5  | 5E+05 | 0.040698 | PARP6    | 0.497898936960849 | 1 |
| COPD-HTN | ENSG00000175294 | 11 | 21  | 4  | 5E+05 | 0.040618 | CATSPER1 | 0.497482786710964 | 1 |
| COPD-HTN | ENSG00000163909 | 1  | 36  | 13 | 5E+05 | 0.040545 | HEYL     | 0.496918873005319 | 1 |
| COPD-HTN | ENSG00000143153 | 1  | 89  | 16 | 5E+05 | 0.040522 | ATP1B1   | 0.496918873005319 | 1 |
| COPD-HTN | ENSG00000196233 | 10 | 157 | 10 | 5E+05 | 0.040518 | LCOR     | 0.496918873005319 | 1 |
| COPD-HTN | ENSG00000136688 | 2  | 16  | 4  | 5E+05 | 0.040467 | IL36G    | 0.496918873005319 | 1 |
| COPD-HTN | ENSG00000176697 | 11 | 85  | 10 | 5E+05 | 0.040428 | BDNF     | 0.496806216       | 1 |
| COPD-HTN | ENSG00000111077 | 12 | 40  | 10 | 5E+05 | 0.040425 | TENC1    | 0.496806216       | 1 |
| COPD-HTN | ENSG00000159556 | 15 | 14  | 4  | 5E+05 | 0.040381 | ISL2     | 0.496806216       | 1 |

|          |                 |    |      |    |       |          |               |                   |   |
|----------|-----------------|----|------|----|-------|----------|---------------|-------------------|---|
| COPD-HTN | ENSG0000078804  | 20 | 8    | 2  | 5E+05 | 0.040371 | TP53INP2      | 0.496806216       | 1 |
| COPD-HTN | ENSG00000160113 | 19 | 32   | 11 | 5E+05 | 0.040362 | NR2F6         | 0.496806216       | 1 |
| COPD-HTN | ENSG00000255150 | 12 | 2    | 1  | 5E+05 | 0.040341 | EID3          | 0.496806216       | 1 |
| COPD-HTN | ENSG00000138085 | 2  | 11   | 3  | 5E+05 | 0.040302 | ATRAID        | 0.496806216       | 1 |
| COPD-HTN | ENSG00000010244 | 17 | 47   | 9  | 5E+05 | 0.040266 | ZNF207        | 0.496806216       | 1 |
| COPD-HTN | ENSG00000162545 | 1  | 3    | 2  | 5E+05 | 0.040254 | CAMK2N1       | 0.496806216       | 1 |
| COPD-HTN | ENSG00000143469 | 1  | 313  | 15 | 5E+05 | 0.040247 | SYT14         | 0.496806216       | 1 |
| COPD-HTN | ENSG00000132170 | 3  | 315  | 22 | 5E+05 | 0.040245 | PPARG         | 0.496806216       | 1 |
| COPD-HTN | ENSG00000182257 | 22 | 12   | 3  | 5E+05 | 0.040193 | C22orf26      | 0.496806216       | 1 |
| COPD-HTN | ENSG00000157613 | 11 | 70   | 13 | 5E+05 | 0.040134 | CREB3L1       | 0.496806216       | 1 |
| COPD-HTN | ENSG00000125901 | 20 | 4    | 2  | 5E+05 | 0.040077 | MRPS26        | 0.496798480833894 | 1 |
| COPD-HTN | ENSG00000169220 | 5  | 17   | 4  | 5E+05 | 0.039919 | RGS14         | 0.495172898384926 | 1 |
| COPD-HTN | ENSG00000138448 | 2  | 117  | 15 | 5E+05 | 0.039906 | ITGAV         | 0.495172898384926 | 1 |
| COPD-HTN | ENSG00000174851 | 11 | 6    | 2  | 5E+05 | 0.039898 | YIF1A         | 0.495172898384926 | 1 |
| COPD-HTN | ENSG00000119318 | 9  | 154  | 17 | 5E+05 | 0.039895 | RAD23B        | 0.495172898384926 | 1 |
| COPD-HTN | ENSG00000071991 | 18 | 203  | 23 | 5E+05 | 0.039893 | CDH19         | 0.495172898384926 | 1 |
| COPD-HTN | ENSG00000168038 | 3  | 1955 | 38 | 5E+05 | 0.039889 | ULK4          | 0.495172898384926 | 1 |
| COPD-HTN | ENSG00000163581 | 3  | 73   | 6  | 5E+05 | 0.039889 | SLC2A2        | 0.495172898384926 | 1 |
| COPD-HTN | ENSG00000267318 | 17 | 42   | 7  | 5E+05 | 0.039876 | RP11-178C3.10 | 0.495172898384926 | 1 |
| COPD-HTN | ENSG00000090273 | 1  | 61   | 9  | 5E+05 | 0.039821 | NUDC          | 0.495172898384926 | 1 |
| COPD-HTN | ENSG00000142039 | 19 | 26   | 3  | 5E+05 | 0.039784 | CCDC97        | 0.495172898384926 | 1 |
| COPD-HTN | ENSG00000143627 | 1  | 12   | 2  | 5E+05 | 0.039777 | PKLR          | 0.495172898384926 | 1 |
| COPD-HTN | ENSG00000141639 | 18 | 373  | 46 | 5E+05 | 0.039687 | MAPK4         | 0.495172898384926 | 1 |
| COPD-HTN | ENSG00000173511 | 11 | 2    | 1  | 5E+05 | 0.039573 | VEGFB         | 0.494877278833107 | 1 |
| COPD-HTN | ENSG00000135094 | 12 | 70   | 4  | 5E+05 | 0.039417 | SDS           | 0.493261073319756 | 1 |
| COPD-HTN | ENSG00000198054 | 21 | 119  | 13 | 5E+05 | 0.039376 | DSCR8         | 0.49308275        | 1 |
| COPD-HTN | ENSG00000160791 | 3  | 16   | 3  | 5E+05 | 0.039344 | CCR5          | 0.493016962610469 | 1 |
| COPD-HTN | ENSG00000116539 | 1  | 136  | 15 | 5E+05 | 0.039252 | ASH1L         | 0.492198718367347 | 1 |
| COPD-HTN | ENSG00000181619 | 14 | 105  | 12 | 5E+05 | 0.039188 | GPR135        | 0.491730703880191 | 1 |
| COPD-HTN | ENSG00000162302 | 11 | 22   | 3  | 5E+05 | 0.039151 | RPS6KA4       | 0.491601078337875 | 1 |
| COPD-HTN | ENSG00000136754 | 10 | 326  | 17 | 5E+05 | 0.03915  | ABI1          | 0.491601078337875 | 1 |
| COPD-HTN | ENSG00000139218 | 12 | 74   | 11 | 5E+05 | 0.039148 | SCAF11        | 0.491601078337875 | 1 |
| COPD-HTN | ENSG00000127831 | 2  | 37   | 4  | 5E+05 | 0.039096 | VIL1          | 0.491601078337875 | 1 |

|          |                 |    |     |    |       |          |          |                   |   |
|----------|-----------------|----|-----|----|-------|----------|----------|-------------------|---|
| COPD-HTN | ENSG00000104320 | 8  | 144 | 7  | 5E+05 | 0.039091 | NBN      | 0.491601078337875 | 1 |
| COPD-HTN | ENSG00000204913 | 17 | 8   | 3  | 5E+05 | 0.03894  | LRRC3C   | 0.490622706766917 | 1 |
| COPD-HTN | ENSG00000100413 | 22 | 28  | 3  | 5E+05 | 0.038921 | POLR3H   | 0.490622706766917 | 1 |
| COPD-HTN | ENSG00000085721 | 16 | 52  | 11 | 5E+05 | 0.038846 | RRN3     | 0.490108362765229 | 1 |
| COPD-HTN | ENSG00000177181 | 1  | 125 | 8  | 5E+05 | 0.038844 | RIMKLA   | 0.490108362765229 | 1 |
| COPD-HTN | ENSG00000145246 | 4  | 345 | 31 | 5E+05 | 0.038837 | ATP10D   | 0.490108362765229 | 1 |
| COPD-HTN | ENSG00000203910 | 1  | 17  | 4  | 5E+05 | 0.038811 | C1orf146 | 0.490108362765229 | 1 |
| COPD-HTN | ENSG00000089876 | 10 | 58  | 10 | 5E+05 | 0.038798 | DHX32    | 0.490108362765229 | 1 |
| COPD-HTN | ENSG00000108375 | 17 | 103 | 14 | 5E+05 | 0.038764 | RNF43    | 0.490108362765229 | 1 |
| COPD-HTN | ENSG00000214944 | 5  | 858 | 60 | 5E+05 | 0.038652 | ARHGEF28 | 0.489671694845361 | 1 |
| COPD-HTN | ENSG00000185009 | 10 | 51  | 6  | 5E+05 | 0.038625 | AP3M1    | 0.489666179504814 | 1 |
| COPD-HTN | ENSG00000171703 | 20 | 59  | 13 | 5E+05 | 0.038596 | TCEA2    | 0.489635284239505 | 1 |
| COPD-HTN | ENSG00000173557 | 2  | 40  | 7  | 5E+05 | 0.038571 | C2orf70  | 0.489635284239505 | 1 |
| COPD-HTN | ENSG00000163633 | 4  | 114 | 13 | 5E+05 | 0.038568 | C4orf36  | 0.489635284239505 | 1 |
| COPD-HTN | ENSG00000174970 | 11 | 11  | 1  | 5E+05 | 0.038531 | OR10AG1  | 0.489635284239505 | 1 |
| COPD-HTN | ENSG00000153820 | 2  | 621 | 25 | 5E+05 | 0.038455 | SPHKAP   | 0.489193247066943 | 1 |
| COPD-HTN | ENSG00000159640 | 17 | 92  | 9  | 5E+05 | 0.038406 | ACE      | 0.488907319060774 | 1 |
| COPD-HTN | ENSG00000012223 | 3  | 158 | 19 | 5E+05 | 0.038367 | LTF      | 0.488748383552177 | 1 |
| COPD-HTN | ENSG00000168159 | 1  | 23  | 7  | 5E+05 | 0.038235 | RNF187   | 0.487403703319502 | 1 |
| COPD-HTN | ENSG00000144161 | 2  | 44  | 7  | 5E+05 | 0.038212 | ZC3H8    | 0.487403703319502 | 1 |
| COPD-HTN | ENSG00000144048 | 2  | 11  | 3  | 5E+05 | 0.038204 | DUSP11   | 0.487403703319502 | 1 |
| COPD-HTN | ENSG00000101444 | 20 | 31  | 2  | 5E+05 | 0.038198 | AHCY     | 0.487403703319502 | 1 |
| COPD-HTN | ENSG00000188921 | 9  | 123 | 14 | 5E+05 | 0.038161 | PTPLAD2  | 0.487403703319502 | 1 |
| COPD-HTN | ENSG00000161203 | 3  | 21  | 6  | 5E+05 | 0.038077 | AP2M1    | 0.48707379666898  | 1 |
| COPD-HTN | ENSG00000116161 | 1  | 16  | 5  | 5E+05 | 0.038058 | CACYBP   | 0.48707379666898  | 1 |
| COPD-HTN | ENSG00000137500 | 11 | 60  | 6  | 5E+05 | 0.037985 | CCDC90B  | 0.486572275886032 | 1 |
| COPD-HTN | ENSG00000069812 | 1  | 37  | 7  | 5E+05 | 0.037971 | HES2     | 0.486572275886032 | 1 |
| COPD-HTN | ENSG00000148019 | 9  | 88  | 14 | 5E+05 | 0.037858 | CEP78    | 0.485620399443285 | 1 |
| COPD-HTN | ENSG00000167578 | 19 | 61  | 12 | 5E+05 | 0.037845 | RAB4B    | 0.485620399443285 | 1 |
| COPD-HTN | ENSG00000196141 | 2  | 365 | 38 | 5E+05 | 0.037823 | SPATS2L  | 0.485620399443285 | 1 |
| COPD-HTN | ENSG00000168795 | 9  | 42  | 12 | 5E+05 | 0.037818 | ZBTB5    | 0.485620399443285 | 1 |
| COPD-HTN | ENSG00000103599 | 15 | 372 | 19 | 5E+05 | 0.03775  | IQCH     | 0.485586706210747 | 1 |
| COPD-HTN | ENSG00000125779 | 20 | 78  | 9  | 5E+05 | 0.037703 | PANK2    | 0.485320809357542 | 1 |

|          |                 |    |     |    |       |          |              |                   |   |
|----------|-----------------|----|-----|----|-------|----------|--------------|-------------------|---|
| COPD-HTN | ENSG00000128713 | 2  | 10  | 3  | 5E+05 | 0.037692 | HOXD11       | 0.485320809357542 | 1 |
| COPD-HTN | ENSG00000211450 | 11 | 3   | 1  | 5E+05 | 0.037682 | C11orf31     | 0.485320809357542 | 1 |
| COPD-HTN | ENSG00000186432 | 3  | 86  | 9  | 5E+05 | 0.037662 | KPNA4        | 0.485320809357542 | 1 |
| COPD-HTN | ENSG00000150051 | 10 | 150 | 16 | 5E+05 | 0.037655 | MKX          | 0.485320809357542 | 1 |
| COPD-HTN | ENSG00000169826 | 10 | 103 | 12 | 5E+05 | 0.037646 | CSGALNACT10  | 0.485320809357542 | 1 |
| COPD-HTN | ENSG00000164008 | 1  | 41  | 8  | 5E+05 | 0.037632 | C1orf50      | 0.485320809357542 | 1 |
| COPD-HTN | ENSG00000165637 | 10 | 37  | 8  | 5E+05 | 0.037601 | VDAC2        | 0.485320809357542 | 1 |
| COPD-HTN | ENSG00000111912 | 6  | 242 | 25 | 5E+05 | 0.037534 | NCOA7        | 0.485320809357542 | 1 |
| COPD-HTN | ENSG00000113758 | 5  | 32  | 5  | 5E+05 | 0.037511 | DBN1         | 0.485320809357542 | 1 |
| COPD-HTN | ENSG00000157500 | 3  | 59  | 9  | 5E+05 | 0.037219 | APPL1        | 0.48245979395218  | 1 |
| COPD-HTN | ENSG00000134253 | 1  | 38  | 7  | 5E+05 | 0.037174 | TRIM45       | 0.482215581984518 | 1 |
| COPD-HTN | ENSG00000103047 | 16 | 458 | 26 | 5E+05 | 0.037166 | TANGO6       | 0.482215581984518 | 1 |
| COPD-HTN | ENSG00000255046 | 8  | 28  | 8  | 5E+05 | 0.037133 | RP11-297N6.2 | 0.482215581984518 | 1 |
| COPD-HTN | ENSG00000104228 | 8  | 39  | 6  | 5E+05 | 0.037085 | TRIM35       | 0.48207884696756  | 1 |
| COPD-HTN | ENSG00000117305 | 1  | 41  | 4  | 5E+05 | 0.037042 | HMGCL        | 0.481859693719125 | 1 |
| COPD-HTN | ENSG00000139644 | 12 | 150 | 11 | 5E+05 | 0.036934 | TMBIM6       | 0.480794083333333 | 1 |
| COPD-HTN | ENSG00000028528 | 15 | 85  | 10 | 5E+05 | 0.036893 | SNX1         | 0.480599766077739 | 1 |
| COPD-HTN | ENSG00000196378 | 8  | 27  | 2  | 5E+05 | 0.036831 | ZNF34        | 0.480131416548798 | 1 |
| COPD-HTN | ENSG00000175920 | 4  | 245 | 31 | 5E+05 | 0.036829 | DOK7         | 0.480131416548798 | 1 |
| COPD-HTN | ENSG00000170423 | 12 | 20  | 5  | 5E+05 | 0.036816 | KRT78        | 0.480131416548798 | 1 |
| COPD-HTN | ENSG00000141431 | 18 | 344 | 23 | 5E+05 | 0.036806 | ASXL3        | 0.480131416548798 | 1 |
| COPD-HTN | ENSG00000129465 | 14 | 16  | 2  | 5E+05 | 0.036801 | RIPK3        | 0.480131416548798 | 1 |
| COPD-HTN | ENSG00000084112 | 12 | 97  | 17 | 5E+05 | 0.036797 | SSH1         | 0.480131416548798 | 1 |
| COPD-HTN | ENSG00000151687 | 2  | 135 | 15 | 5E+05 | 0.036743 | ANKAR        | 0.480131416548798 | 1 |
| COPD-HTN | ENSG00000120885 | 8  | 37  | 6  | 5E+05 | 0.036703 | CLU          | 0.480131416548798 | 1 |
| COPD-HTN | ENSG00000134909 | 11 | 582 | 21 | 5E+05 | 0.036547 | ARHGAP32     | 0.479140007823613 | 1 |
| COPD-HTN | ENSG00000131188 | 5  | 11  | 3  | 5E+05 | 0.036533 | PRR7         | 0.479140007823613 | 1 |
| COPD-HTN | ENSG00000179295 | 12 | 79  | 12 | 5E+05 | 0.036524 | PTPN11       | 0.479140007823613 | 1 |
| COPD-HTN | ENSG00000168872 | 16 | 22  | 7  | 5E+05 | 0.036507 | DDX19A       | 0.479140007823613 | 1 |
| COPD-HTN | ENSG00000144369 | 2  | 107 | 14 | 5E+05 | 0.036491 | FAM171B      | 0.479140007823613 | 1 |
| COPD-HTN | ENSG00000152404 | 11 | 402 | 23 | 5E+05 | 0.03645  | CWF19L2      | 0.479140007823613 | 1 |
| COPD-HTN | ENSG00000130299 | 19 | 26  | 5  | 5E+05 | 0.036372 | GTPBP3       | 0.47888934        | 1 |
| COPD-HTN | ENSG00000181291 | 17 | 121 | 25 | 5E+05 | 0.036362 | TMEM132E     | 0.47888934        | 1 |

|          |                 |    |     |    |       |          |          |                   |   |
|----------|-----------------|----|-----|----|-------|----------|----------|-------------------|---|
| COPD-HTN | ENSG0000067225  | 15 | 35  | 7  | 5E+05 | 0.036181 | PKM      | 0.477056060801144 | 1 |
| COPD-HTN | ENSG00000102904 | 16 | 27  | 6  | 5E+05 | 0.036165 | TSNAXIP1 | 0.477056060801144 | 1 |
| COPD-HTN | ENSG00000138109 | 10 | 159 | 15 | 5E+05 | 0.036156 | CYP2C9   | 0.477056060801144 | 1 |
| COPD-HTN | ENSG00000170677 | 18 | 121 | 18 | 5E+05 | 0.036114 | SOCS6    | 0.477056060801144 | 1 |
| COPD-HTN | ENSG00000148700 | 10 | 163 | 16 | 5E+05 | 0.036063 | ADD3     | 0.476864619081779 | 1 |
| COPD-HTN | ENSG00000103657 | 15 | 519 | 17 | 5E+05 | 0.036029 | HERC1    | 0.476757040201005 | 1 |
| COPD-HTN | ENSG00000198625 | 1  | 113 | 9  | 5E+05 | 0.035983 | MDM4     | 0.47649040158046  | 1 |
| COPD-HTN | ENSG00000116205 | 1  | 104 | 11 | 5E+05 | 0.035969 | TCEANC2  | 0.47649040158046  | 1 |
| COPD-HTN | ENSG00000197457 | 20 | 28  | 6  | 5E+05 | 0.035938 | STMN3    | 0.47649040158046  | 1 |
| COPD-HTN | ENSG00000171136 | 19 | 9   | 3  | 5E+05 | 0.03591  | RLN3     | 0.47649040158046  | 1 |
| COPD-HTN | ENSG00000162927 | 2  | 120 | 20 | 5E+05 | 0.035907 | PUS10    | 0.47649040158046  | 1 |
| COPD-HTN | ENSG00000253304 | 1  | 9   | 3  | 5E+05 | 0.035906 | TMEM200B | 0.47649040158046  | 1 |
| COPD-HTN | ENSG00000052723 | 1  | 3   | 1  | 5E+05 | 0.035793 | SIKE1    | 0.47602624025974  | 1 |
| COPD-HTN | ENSG00000139405 | 12 | 10  | 2  | 5E+05 | 0.035739 | RITA1    | 0.475651254151625 | 1 |
| COPD-HTN | ENSG00000110148 | 11 | 51  | 8  | 5E+05 | 0.035734 | CCKBR    | 0.475651254151625 | 1 |
| COPD-HTN | ENSG00000105088 | 19 | 191 | 21 | 5E+05 | 0.035685 | OLFM2    | 0.475619381778742 | 1 |
| COPD-HTN | ENSG00000077380 | 2  | 103 | 14 | 5E+05 | 0.035575 | DYNC112  | 0.474496363965268 | 1 |
| COPD-HTN | ENSG00000166260 | 17 | 61  | 6  | 5E+05 | 0.035484 | COX11    | 0.473625323678494 | 1 |
| COPD-HTN | ENSG00000213494 | 17 | 76  | 10 | 5E+05 | 0.035479 | CCL14    | 0.473625323678494 | 1 |
| COPD-HTN | ENSG00000123064 | 12 | 43  | 4  | 5E+05 | 0.035423 | DDX54    | 0.473496852066715 | 1 |
| COPD-HTN | ENSG00000100625 | 14 | 11  | 3  | 5E+05 | 0.03542  | SIX4     | 0.473496852066715 | 1 |
| COPD-HTN | ENSG00000149743 | 11 | 4   | 2  | 5E+05 | 0.035334 | TRPT1    | 0.472993189542484 | 1 |
| COPD-HTN | ENSG00000009830 | 14 | 143 | 24 | 5E+05 | 0.035283 | POMT2    | 0.472653734738372 | 1 |
| COPD-HTN | ENSG00000163374 | 1  | 20  | 5  | 5E+05 | 0.035223 | YY1AP1   | 0.472193133818182 | 1 |
| COPD-HTN | ENSG00000231924 | 19 | 56  | 6  | 5E+05 | 0.035185 | PSG1     | 0.472027005094614 | 1 |
| COPD-HTN | ENSG00000154310 | 3  | 919 | 92 | 5E+05 | 0.035097 | TNIK     | 0.471189367079388 | 1 |
| COPD-HTN | ENSG00000240771 | 12 | 18  | 6  | 5E+05 | 0.035074 | ARHGEF25 | 0.471189367079388 | 1 |
| COPD-HTN | ENSG00000147535 | 8  | 7   | 3  | 5E+05 | 0.03504  | PPAPDC1B | 0.471110371991247 | 1 |
| COPD-HTN | ENSG00000175318 | 15 | 38  | 7  | 5E+05 | 0.034839 | GRAMD2   | 0.468749844525548 | 1 |
| COPD-HTN | ENSG00000198844 | 17 | 39  | 10 | 5E+05 | 0.03482  | ARHGEF15 | 0.468749844525548 | 1 |
| COPD-HTN | ENSG00000123473 | 1  | 139 | 8  | 5E+05 | 0.034766 | STIL     | 0.468451519005848 | 1 |
| COPD-HTN | ENSG00000180346 | 4  | 4   | 1  | 5E+05 | 0.034731 | TIGD2    | 0.468322255303584 | 1 |
| COPD-HTN | ENSG00000013275 | 19 | 24  | 5  | 5E+05 | 0.034697 | PSMC4    | 0.468206296486091 | 1 |

|          |                 |    |      |    |       |          |            |                    |   |
|----------|-----------------|----|------|----|-------|----------|------------|--------------------|---|
| COPD-HTN | ENSG00000100319 | 22 | 103  | 9  | 5E+05 | 0.034658 | ZMAT5      | 0.468022647619048  | 1 |
| COPD-HTN | ENSG00000147697 | 8  | 100  | 16 | 5E+05 | 0.034657 | GSDMC      | 0.468022647619048  | 1 |
| COPD-HTN | ENSG00000101166 | 20 | 13   | 4  | 5E+05 | 0.034652 | SLMO2      | 0.468022647619048  | 1 |
| COPD-HTN | ENSG00000119801 | 2  | 26   | 9  | 5E+05 | 0.034624 | YPEL5      | 0.468022647619048  | 1 |
| COPD-HTN | ENSG00000186446 | 3  | 15   | 4  | 5E+05 | 0.034604 | ZNF501     | 0.468022647619048  | 1 |
| COPD-HTN | ENSG00000161574 | 17 | 72   | 9  | 5E+05 | 0.034567 | CCL15-CCL1 | 0.468022647619048  | 1 |
| COPD-HTN | ENSG00000107949 | 10 | 41   | 7  | 5E+05 | 0.034477 | BCCIP      | 0.467633952170714  | 1 |
| COPD-HTN | ENSG00000163666 | 3  | 37   | 7  | 5E+05 | 0.034435 | HESX1      | 0.467408214285714  | 1 |
| COPD-HTN | ENSG00000120729 | 5  | 11   | 3  | 5E+05 | 0.034425 | MYOT       | 0.467408214285714  | 1 |
| COPD-HTN | ENSG00000089169 | 12 | 537  | 47 | 5E+05 | 0.03435  | RPH3A      | 0.466942146017699  | 1 |
| COPD-HTN | ENSG00000126500 | 11 | 46   | 9  | 5E+05 | 0.03433  | FLRT1      | 0.466942146017699  | 1 |
| COPD-HTN | ENSG00000158092 | 3  | 168  | 6  | 5E+05 | 0.034293 | NCK1       | 0.466855885524372  | 1 |
| COPD-HTN | ENSG00000163875 | 1  | 64   | 11 | 5E+05 | 0.034256 | MEAF6      | 0.466696857354028  | 1 |
| COPD-HTN | ENSG00000165841 | 10 | 402  | 15 | 5E+05 | 0.034252 | CYP2C19    | 0.466696857354028  | 1 |
| COPD-HTN | ENSG00000119326 | 9  | 193  | 20 | 5E+05 | 0.034208 | CTNNAL1    | 0.466696857354028  | 1 |
| COPD-HTN | ENSG00000135148 | 12 | 22   | 5  | 5E+05 | 0.034176 | TRAFD1     | 0.4666416355555556 | 1 |
| COPD-HTN | ENSG00000111684 | 12 | 41   | 5  | 5E+05 | 0.034173 | LPCAT3     | 0.4666416355555556 | 1 |
| COPD-HTN | ENSG00000173068 | 9  | 1327 | 74 | 5E+05 | 0.034152 | BNC2       | 0.4666416355555556 | 1 |
| COPD-HTN | ENSG00000137831 | 15 | 147  | 12 | 5E+05 | 0.03413  | UACA       | 0.4666416355555556 | 1 |
| COPD-HTN | ENSG00000010282 | 3  | 18   | 4  | 5E+05 | 0.034044 | HHATL      | 0.466220692421991  | 1 |
| COPD-HTN | ENSG00000172057 | 17 | 10   | 4  | 5E+05 | 0.034019 | ORMDL3     | 0.466220692421991  | 1 |
| COPD-HTN | ENSG00000221909 | 7  | 9    | 3  | 5E+05 | 0.033998 | FAM200A    | 0.466220692421991  | 1 |
| COPD-HTN | ENSG00000010319 | 3  | 14   | 6  | 5E+05 | 0.033945 | SEMA3G     | 0.465903339538347  | 1 |
| COPD-HTN | ENSG00000105982 | 7  | 79   | 9  | 5E+05 | 0.033939 | RNF32      | 0.465903339538347  | 1 |
| COPD-HTN | ENSG00000165644 | 10 | 1    | 1  | 5E+05 | 0.033908 | COMTD1     | 0.465903339538347  | 1 |
| COPD-HTN | ENSG00000173598 | 12 | 57   | 8  | 5E+05 | 0.033863 | NUDT4      | 0.465818417164179  | 1 |
| COPD-HTN | ENSG00000186583 | 8  | 17   | 5  | 5E+05 | 0.033858 | SPATC1     | 0.465818417164179  | 1 |
| COPD-HTN | ENSG00000091009 | 5  | 222  | 14 | 5E+05 | 0.033765 | RBM27      | 0.465164607623318  | 1 |
| COPD-HTN | ENSG00000058091 | 7  | 1915 | 65 | 5E+05 | 0.033711 | CDK14      | 0.464768035153328  | 1 |
| COPD-HTN | ENSG00000111271 | 12 | 55   | 5  | 5E+05 | 0.033699 | ACAD10     | 0.464768035153328  | 1 |
| COPD-HTN | ENSG00000168917 | 3  | 87   | 4  | 5E+05 | 0.033684 | SLC35G2    | 0.464768035153328  | 1 |
| COPD-HTN | ENSG00000177096 | 22 | 11   | 3  | 5E+05 | 0.033673 | FAM109B    | 0.464768035153328  | 1 |
| COPD-HTN | ENSG00000186566 | 17 | 140  | 10 | 5E+05 | 0.033549 | GPATCH8    | 0.463922518379595  | 1 |

|          |                 |    |      |     |       |          |         |                   |   |
|----------|-----------------|----|------|-----|-------|----------|---------|-------------------|---|
| COPD-HTN | ENSG00000213930 | 9  | 18   | 5   | 5E+05 | 0.033506 | GALT    | 0.463675749249249 | 1 |
| COPD-HTN | ENSG00000108671 | 17 | 36   | 8   | 5E+05 | 0.033482 | PSMD11  | 0.463675749249249 | 1 |
| COPD-HTN | ENSG00000128487 | 17 | 653  | 18  | 5E+05 | 0.033409 | SPECC1  | 0.463028644360902 | 1 |
| COPD-HTN | ENSG00000124767 | 6  | 63   | 11  | 5E+05 | 0.033347 | GLO1    | 0.462517118886381 | 1 |
| COPD-HTN | ENSG00000113396 | 5  | 1781 | 42  | 5E+05 | 0.033315 | SLC27A6 | 0.462421231174699 | 1 |
| COPD-HTN | ENSG00000182896 | 17 | 3    | 1   | 5E+05 | 0.033172 | TMEM95  | 0.460783327807084 | 1 |
| COPD-HTN | ENSG00000111300 | 12 | 72   | 11  | 5E+05 | 0.03313  | NAA25   | 0.46054697586727  | 1 |
| COPD-HTN | ENSG00000110536 | 11 | 5    | 2   | 5E+05 | 0.033124 | PTPMT1  | 0.46054697586727  | 1 |
| COPD-HTN | ENSG00000183888 | 1  | 16   | 5   | 5E+05 | 0.033106 | C1orf64 | 0.46054697586727  | 1 |
| COPD-HTN | ENSG00000186710 | 12 | 14   | 1   | 5E+05 | 0.033097 | CCDC42B | 0.46054697586727  | 1 |
| COPD-HTN | ENSG0000020633  | 1  | 119  | 24  | 5E+05 | 0.03306  | RUNX3   | 0.46054697586727  | 1 |
| COPD-HTN | ENSG00000105229 | 19 | 92   | 9   | 5E+05 | 0.032995 | PIAS4   | 0.460406385314156 | 1 |
| COPD-HTN | ENSG00000081014 | 15 | 213  | 15  | 5E+05 | 0.032977 | AP4E1   | 0.460406385314156 | 1 |
| COPD-HTN | ENSG00000113742 | 5  | 173  | 17  | 5E+05 | 0.03296  | CPEB4   | 0.460406385314156 | 1 |
| COPD-HTN | ENSG00000123119 | 8  | 308  | 11  | 5E+05 | 0.032946 | NECAB1  | 0.460406385314156 | 1 |
| COPD-HTN | ENSG00000160570 | 19 | 18   | 2   | 5E+05 | 0.032915 | DEDD2   | 0.460406385314156 | 1 |
| COPD-HTN | ENSG00000137571 | 8  | 396  | 36  | 5E+05 | 0.0329   | SLCO5A1 | 0.460406385314156 | 1 |
| COPD-HTN | ENSG00000164347 | 5  | 81   | 9   | 5E+05 | 0.032885 | GFM2    | 0.460406385314156 | 1 |
| COPD-HTN | ENSG00000126749 | 12 | 36   | 6   | 5E+05 | 0.032867 | EMG1    | 0.460406385314156 | 1 |
| COPD-HTN | ENSG00000174776 | 3  | 253  | 26  | 5E+05 | 0.032864 | WDR49   | 0.460406385314156 | 1 |
| COPD-HTN | ENSG00000119401 | 9  | 25   | 6   | 5E+05 | 0.032854 | TRIM32  | 0.460406385314156 | 1 |
| COPD-HTN | ENSG00000167104 | 20 | 36   | 6   | 5E+05 | 0.032769 | BPIFB6  | 0.460406385314156 | 1 |
| COPD-HTN | ENSG00000108439 | 17 | 16   | 6   | 5E+05 | 0.032676 | PNPO    | 0.459783746564885 | 1 |
| COPD-HTN | ENSG00000160161 | 19 | 16   | 2   | 5E+05 | 0.032632 | CILP2   | 0.459515398013751 | 1 |
| COPD-HTN | ENSG00000006047 | 17 | 8    | 2   | 5E+05 | 0.032591 | YBX2    | 0.459288916666667 | 1 |
| COPD-HTN | ENSG00000109189 | 4  | 77   | 6   | 5E+05 | 0.032581 | USP46   | 0.459288916666667 | 1 |
| COPD-HTN | ENSG00000105251 | 19 | 26   | 5   | 5E+05 | 0.032576 | SHD     | 0.459288916666667 | 1 |
| COPD-HTN | ENSG00000162642 | 1  | 23   | 8   | 5E+05 | 0.032552 | C1orf52 | 0.459288916666667 | 1 |
| COPD-HTN | ENSG00000082497 | 1  | 13   | 5   | 5E+05 | 0.03251  | SERTAD4 | 0.459288916666667 | 1 |
| COPD-HTN | ENSG00000114861 | 3  | 1172 | 104 | 5E+05 | 0.032476 | FOXP1   | 0.459288916666667 | 1 |
| COPD-HTN | ENSG00000109618 | 4  | 67   | 12  | 5E+05 | 0.032465 | SEPSECS | 0.459288916666667 | 1 |
| COPD-HTN | ENSG00000165120 | 7  | 16   | 4   | 5E+05 | 0.032452 | SSMEM1  | 0.459288916666667 | 1 |
| COPD-HTN | ENSG00000112208 | 6  | 18   | 4   | 5E+05 | 0.032413 | BAG2    | 0.459288916666667 | 1 |

|          |                 |    |     |    |       |          |            |                   |   |
|----------|-----------------|----|-----|----|-------|----------|------------|-------------------|---|
| COPD-HTN | ENSG00000181754 | 1  | 9   | 4  | 5E+05 | 0.03238  | AMIGO1     | 0.459288916666667 | 1 |
| COPD-HTN | ENSG00000074266 | 11 | 72  | 9  | 5E+05 | 0.032269 | EED        | 0.458254604776579 | 1 |
| COPD-HTN | ENSG00000119328 | 9  | 41  | 8  | 5E+05 | 0.032237 | FAM206A    | 0.458153138781804 | 1 |
| COPD-HTN | ENSG00000023191 | 11 | 54  | 8  | 5E+05 | 0.032076 | RNH1       | 0.45621675        | 1 |
| COPD-HTN | ENSG00000243943 | 2  | 98  | 10 | 5E+05 | 0.03202  | ZNF512     | 0.455771938223938 | 1 |
| COPD-HTN | ENSG00000117500 | 1  | 54  | 9  | 5E+05 | 0.032019 | TMED5      | 0.455771938223938 | 1 |
| COPD-HTN | ENSG00000203859 | 1  | 15  | 2  | 5E+05 | 0.031995 | HSD3B2     | 0.455771938223938 | 1 |
| COPD-HTN | ENSG00000122483 | 1  | 202 | 15 | 5E+05 | 0.031943 | CCDC18     | 0.455731671052632 | 1 |
| COPD-HTN | ENSG00000121621 | 11 | 96  | 12 | 5E+05 | 0.031915 | KIF18A     | 0.455684891556933 | 1 |
| COPD-HTN | ENSG00000197562 | 16 | 103 | 7  | 5E+05 | 0.031845 | RAB40C     | 0.455037895348837 | 1 |
| COPD-HTN | ENSG00000135213 | 7  | 71  | 12 | 5E+05 | 0.031828 | POM121C    | 0.455037895348837 | 1 |
| COPD-HTN | ENSG00000164932 | 8  | 36  | 7  | 5E+05 | 0.031827 | CTHRC1     | 0.455037895348837 | 1 |
| COPD-HTN | ENSG00000114383 | 3  | 3   | 2  | 5E+05 | 0.03179  | TUSC2      | 0.455037895348837 | 1 |
| COPD-HTN | ENSG00000147432 | 8  | 176 | 6  | 5E+05 | 0.03176  | CHRN3      | 0.455037895348837 | 1 |
| COPD-HTN | ENSG00000131981 | 14 | 37  | 4  | 5E+05 | 0.031734 | LGALS3     | 0.455037895348837 | 1 |
| COPD-HTN | ENSG00000112183 | 6  | 18  | 5  | 5E+05 | 0.031659 | RBM24      | 0.454494039719626 | 1 |
| COPD-HTN | ENSG00000047365 | 4  | 728 | 52 | 5E+05 | 0.031604 | ARAP2      | 0.454058091971941 | 1 |
| COPD-HTN | ENSG00000173486 | 11 | 3   | 2  | 5E+05 | 0.031577 | FKBP2      | 0.454024056942278 | 1 |
| COPD-HTN | ENSG00000198276 | 20 | 30  | 10 | 5E+05 | 0.031526 | UCKL1      | 0.453644619828259 | 1 |
| COPD-HTN | ENSG00000108423 | 17 | 56  | 8  | 5E+05 | 0.031462 | TUBD1      | 0.4530773796875   | 1 |
| COPD-HTN | ENSG00000149043 | 11 | 35  | 8  | 5E+05 | 0.031415 | SYT8       | 0.452754257232213 | 1 |
| COPD-HTN | ENSG00000076382 | 17 | 13  | 8  | 5E+05 | 0.031376 | SPAG5      | 0.452546015649452 | 1 |
| COPD-HTN | ENSG00000145075 | 3  | 546 | 32 | 5E+05 | 0.031315 | CCDC39     | 0.452019886452623 | 1 |
| COPD-HTN | ENSG00000043514 | 1  | 107 | 12 | 5E+05 | 0.031293 | TRIT1      | 0.452019886452623 | 1 |
| COPD-HTN | ENSG00000166323 | 11 | 222 | 12 | 5E+05 | 0.031249 | C11orf65   | 0.451774758431373 | 1 |
| COPD-HTN | ENSG00000181649 | 11 | 2   | 1  | 5E+05 | 0.031148 | PHLDA2     | 0.450668040816327 | 1 |
| COPD-HTN | ENSG00000215114 | 8  | 69  | 10 | 5E+05 | 0.031134 | UBXN2B     | 0.450668040816327 | 1 |
| COPD-HTN | ENSG00000106125 | 7  | 394 | 26 | 5E+05 | 0.031114 | FAM188B    | 0.450668040816327 | 1 |
| COPD-HTN | ENSG00000144736 | 3  | 147 | 9  | 5E+05 | 0.03108  | SHQ1       | 0.450668040816327 | 1 |
| COPD-HTN | ENSG00000089639 | 19 | 21  | 6  | 5E+05 | 0.031065 | GMIP       | 0.450668040816327 | 1 |
| COPD-HTN | ENSG00000268412 | 2  | 1   | 1  | 5E+05 | 0.030816 | AC013449.1 | 0.447621219858156 | 1 |
| COPD-HTN | ENSG00000101337 | 20 | 98  | 8  | 5E+05 | 0.030686 | TM9SF4     | 0.446084414826499 | 1 |
| COPD-HTN | ENSG00000187871 | 6  | 364 | 23 | 5E+05 | 0.030682 | GFRAL      | 0.446084414826499 | 1 |

|          |                 |    |      |     |       |          |            |                   |   |
|----------|-----------------|----|------|-----|-------|----------|------------|-------------------|---|
| COPD-HTN | ENSG00000164221 | 5  | 51   | 9   | 5E+05 | 0.030677 | CCDC112    | 0.446084414826499 | 1 |
| COPD-HTN | ENSG00000137936 | 1  | 826  | 29  | 5E+05 | 0.030671 | BCAR3      | 0.446084414826499 | 1 |
| COPD-HTN | ENSG00000185666 | 22 | 1535 | 102 | 5E+05 | 0.030637 | SYN3       | 0.446084414826499 | 1 |
| COPD-HTN | ENSG00000043143 | 5  | 134  | 22  | 5E+05 | 0.030613 | JADE2      | 0.446084414826499 | 1 |
| COPD-HTN | ENSG00000196526 | 4  | 845  | 36  | 5E+05 | 0.03061  | AFAP1      | 0.446084414826499 | 1 |
| COPD-HTN | ENSG00000103044 | 16 | 22   | 8   | 5E+05 | 0.030606 | HAS3       | 0.446084414826499 | 1 |
| COPD-HTN | ENSG00000205147 | 19 | 9    | 4   | 5E+05 | 0.0306   | AC016586.1 | 0.446084414826499 | 1 |
| COPD-HTN | ENSG00000179094 | 17 | 31   | 8   | 5E+05 | 0.030545 | PER1       | 0.446084414826499 | 1 |
| COPD-HTN | ENSG00000255223 | 11 | 6    | 2   | 5E+05 | 0.03045  | OR5M11     | 0.446084414826499 | 1 |
| COPD-HTN | ENSG00000075043 | 20 | 248  | 30  | 5E+05 | 0.030345 | KCNQ2      | 0.444987577565632 | 1 |
| COPD-HTN | ENSG00000176920 | 19 | 35   | 4   | 5E+05 | 0.030327 | FUT2       | 0.444987577565632 | 1 |
| COPD-HTN | ENSG00000168924 | 4  | 21   | 12  | 5E+05 | 0.030299 | LETM1      | 0.444987577565632 | 1 |
| COPD-HTN | ENSG00000109182 | 4  | 114  | 9   | 5E+05 | 0.030285 | CWH43      | 0.444987577565632 | 1 |
| COPD-HTN | ENSG00000146232 | 6  | 15   | 6   | 5E+05 | 0.030193 | NFKBIE     | 0.444172042298484 | 1 |
| COPD-HTN | ENSG00000164093 | 4  | 37   | 7   | 5E+05 | 0.030168 | PITX2      | 0.444158741214058 | 1 |
| COPD-HTN | ENSG00000139445 | 12 | 57   | 10  | 5E+05 | 0.030067 | FOXN4      | 0.443025588329337 | 1 |
| COPD-HTN | ENSG00000099381 | 16 | 27   | 3   | 5E+05 | 0.030031 | SETD1A     | 0.442849138       | 1 |
| COPD-HTN | ENSG00000183196 | 16 | 28   | 12  | 5E+05 | 0.030023 | CHST6      | 0.442849138       | 1 |
| COPD-HTN | ENSG00000169964 | 3  | 2    | 1   | 5E+05 | 0.030021 | TMEM42     | 0.442849138       | 1 |
| COPD-HTN | ENSG00000165702 | 9  | 160  | 37  | 5E+05 | 0.030001 | GFI1B      | 0.442849138       | 1 |
| COPD-HTN | ENSG00000185129 | 5  | 3    | 2   | 5E+05 | 0.029969 | PURA       | 0.442849138       | 1 |
| COPD-HTN | ENSG00000181322 | 3  | 49   | 15  | 5E+05 | 0.029964 | NME9       | 0.442849138       | 1 |
| COPD-HTN | ENSG00000204020 | 10 | 67   | 12  | 5E+05 | 0.029907 | LIPN       | 0.442849138       | 1 |
| COPD-HTN | ENSG00000114166 | 3  | 443  | 28  | 5E+05 | 0.029905 | KAT2B      | 0.442849138       | 1 |
| COPD-HTN | ENSG00000269795 | 1  | 11   | 4   | 5E+05 | 0.029865 | AC092782.1 | 0.442849138       | 1 |
| COPD-HTN | ENSG00000111530 | 12 | 153  | 13  | 5E+05 | 0.029858 | CAND1      | 0.442849138       | 1 |
| COPD-HTN | ENSG00000151465 | 10 | 127  | 15  | 5E+05 | 0.029812 | CDC123     | 0.442849138       | 1 |
| COPD-HTN | ENSG00000197851 | 7  | 42   | 9   | 5E+05 | 0.029809 | C7orf76    | 0.442849138       | 1 |
| COPD-HTN | ENSG00000067208 | 1  | 508  | 10  | 5E+05 | 0.029766 | EVI5       | 0.442849138       | 1 |
| COPD-HTN | ENSG00000120696 | 13 | 4    | 1   | 5E+05 | 0.029722 | KBTBD7     | 0.442849138       | 1 |
| COPD-HTN | ENSG00000084733 | 2  | 169  | 7   | 5E+05 | 0.029655 | RAB10      | 0.442257779126214 | 1 |
| COPD-HTN | ENSG00000171492 | 1  | 156  | 32  | 5E+05 | 0.029642 | LRRRC8D    | 0.442257779126214 | 1 |
| COPD-HTN | ENSG00000106526 | 7  | 144  | 15  | 5E+05 | 0.029595 | ACTR3C     | 0.442078310372771 | 1 |

|          |                 |    |     |    |       |          |              |                   |   |
|----------|-----------------|----|-----|----|-------|----------|--------------|-------------------|---|
| COPD-HTN | ENSG00000159176 | 1  | 91  | 12 | 5E+05 | 0.029591 | CSRP1        | 0.442078310372771 | 1 |
| COPD-HTN | ENSG00000167258 | 17 | 171 | 10 | 5E+05 | 0.029561 | CDK12        | 0.442078310372771 | 1 |
| COPD-HTN | ENSG00000253426 | 8  | 21  | 3  | 5E+05 | 0.029521 | RP11-10A14.4 | 0.442047597887896 | 1 |
| COPD-HTN | ENSG00000170915 | 6  | 157 | 31 | 5E+05 | 0.029455 | PAQR8        | 0.441417898373984 | 1 |
| COPD-HTN | ENSG00000106460 | 7  | 182 | 9  | 5E+05 | 0.02944  | TMEM106B     | 0.441417898373984 | 1 |
| COPD-HTN | ENSG00000118971 | 12 | 59  | 15 | 5E+05 | 0.029425 | CCND2        | 0.441417898373984 | 1 |
| COPD-HTN | ENSG00000206260 | 3  | 3   | 2  | 5E+05 | 0.029402 | PRR23A       | 0.441417898373984 | 1 |
| COPD-HTN | ENSG00000139428 | 12 | 88  | 13 | 5E+05 | 0.029358 | MMAB         | 0.441399685154976 | 1 |
| COPD-HTN | ENSG00000134242 | 1  | 89  | 13 | 5E+05 | 0.029247 | PTPN22       | 0.440089755918367 | 1 |
| COPD-HTN | ENSG00000125686 | 17 | 68  | 6  | 5E+05 | 0.029246 | MED1         | 0.440089755918367 | 1 |
| COPD-HTN | ENSG00000050130 | 14 | 70  | 8  | 5E+05 | 0.029234 | JKAMP        | 0.440089755918367 | 1 |
| COPD-HTN | ENSG00000178053 | 3  | 102 | 12 | 5E+05 | 0.029227 | MLF1         | 0.440089755918367 | 1 |
| COPD-HTN | ENSG00000106113 | 7  | 105 | 18 | 5E+05 | 0.029144 | CRHR2        | 0.439976537264537 | 1 |
| COPD-HTN | ENSG00000071082 | 2  | 49  | 7  | 5E+05 | 0.02905  | RPL31        | 0.438916926229508 | 1 |
| COPD-HTN | ENSG00000164744 | 7  | 76  | 6  | 5E+05 | 0.02902  | SUN3         | 0.438823347005742 | 1 |
| COPD-HTN | ENSG00000104129 | 15 | 49  | 6  | 5E+05 | 0.028972 | DNAJC17      | 0.438457205254516 | 1 |
| COPD-HTN | ENSG00000164967 | 9  | 2   | 1  | 5E+05 | 0.028916 | RPP25L       | 0.437969291700904 | 1 |
| COPD-HTN | ENSG00000254959 | 7  | 459 | 31 | 5E+05 | 0.028849 | INMT-FAM180  | 0.437313829769737 | 1 |
| COPD-HTN | ENSG00000149781 | 11 | 29  | 7  | 5E+05 | 0.028823 | FERMT3       | 0.43727930781893  | 1 |
| COPD-HTN | ENSG00000196263 | 19 | 69  | 9  | 5E+05 | 0.028748 | ZNF471       | 0.436500728171334 | 1 |
| COPD-HTN | ENSG00000079462 | 19 | 4   | 1  | 5E+05 | 0.02872  | PAFAH1B3     | 0.436435086562242 | 1 |
| COPD-HTN | ENSG00000084764 | 2  | 55  | 4  | 5E+05 | 0.0287   | MAPRE3       | 0.436435086562242 | 1 |
| COPD-HTN | ENSG00000157150 | 3  | 16  | 5  | 5E+05 | 0.028687 | TIMP4        | 0.436435086562242 | 1 |
| COPD-HTN | ENSG00000133789 | 11 | 265 | 10 | 5E+05 | 0.028604 | SWAP70       | 0.435750026446281 | 1 |
| COPD-HTN | ENSG00000139437 | 12 | 164 | 16 | 5E+05 | 0.028519 | TCHP         | 0.434814497105045 | 1 |
| COPD-HTN | ENSG00000249590 | 22 | 44  | 11 | 5E+05 | 0.028486 | RP4-539M6.1  | 0.434670892384106 | 1 |
| COPD-HTN | ENSG00000138795 | 4  | 191 | 17 | 5E+05 | 0.028455 | LEF1         | 0.434557593206297 | 1 |
| COPD-HTN | ENSG00000226887 | 4  | 37  | 3  | 5E+05 | 0.028413 | ERVMER34-10  | 0.43427597761194  | 1 |
| COPD-HTN | ENSG00000110921 | 12 | 63  | 11 | 5E+05 | 0.028354 | MVK          | 0.433733843983403 | 1 |
| COPD-HTN | ENSG00000008130 | 1  | 65  | 8  | 5E+05 | 0.028353 | NADK         | 0.433733843983403 | 1 |
| COPD-HTN | ENSG00000113248 | 5  | 5   | 3  | 5E+05 | 0.028329 | PCDHB15      | 0.433733843983403 | 1 |
| COPD-HTN | ENSG00000163935 | 3  | 251 | 18 | 5E+05 | 0.028325 | SFMBT1       | 0.433733843983403 | 1 |
| COPD-HTN | ENSG00000110955 | 12 | 7   | 1  | 5E+05 | 0.028266 | ATP5B        | 0.433733843983403 | 1 |

|          |                 |    |     |    |       |          |           |                   |   |
|----------|-----------------|----|-----|----|-------|----------|-----------|-------------------|---|
| COPD-HTN | ENSG0000021776  | 15 | 233 | 18 | 5E+05 | 0.028244 | AQR       | 0.433733843983403 | 1 |
| COPD-HTN | ENSG00000204991 | 16 | 142 | 14 | 5E+05 | 0.028199 | SPIRE2    | 0.433521407005838 | 1 |
| COPD-HTN | ENSG00000100285 | 22 | 27  | 6  | 5E+05 | 0.028139 | NEFH      | 0.432960089315526 | 1 |
| COPD-HTN | ENSG00000168374 | 3  | 68  | 9  | 5E+05 | 0.028135 | ARF4      | 0.432960089315526 | 1 |
| COPD-HTN | ENSG00000205212 | 17 | 78  | 15 | 5E+05 | 0.02808  | CCDC144NL | 0.432774782608696 | 1 |
| COPD-HTN | ENSG00000203993 | 9  | 1   | 1  | 5E+05 | 0.028072 | C9orf37   | 0.432774782608696 | 1 |
| COPD-HTN | ENSG00000099849 | 11 | 11  | 5  | 5E+05 | 0.028047 | RASSF7    | 0.432774782608696 | 1 |
| COPD-HTN | ENSG00000156603 | 11 | 7   | 3  | 5E+05 | 0.028    | MED19     | 0.432626990779547 | 1 |
| COPD-HTN | ENSG00000159023 | 1  | 347 | 19 | 5E+05 | 0.027986 | EPB41     | 0.432626990779547 | 1 |
| COPD-HTN | ENSG00000163629 | 4  | 535 | 12 | 5E+05 | 0.027875 | PTPN13    | 0.431418870696893 | 1 |
| COPD-HTN | ENSG00000132698 | 1  | 5   | 3  | 5E+05 | 0.027867 | RAB25     | 0.431418870696893 | 1 |
| COPD-HTN | ENSG00000130758 | 19 | 31  | 8  | 5E+05 | 0.027812 | MAP3K10   | 0.431167868797309 | 1 |
| COPD-HTN | ENSG00000126464 | 19 | 77  | 9  | 5E+05 | 0.027789 | PRR12     | 0.431167868797309 | 1 |
| COPD-HTN | ENSG00000125447 | 17 | 39  | 5  | 5E+05 | 0.027711 | GGA3      | 0.430325916596462 | 1 |
| COPD-HTN | ENSG00000153832 | 2  | 116 | 17 | 5E+05 | 0.027703 | FBXO36    | 0.430325916596462 | 1 |
| COPD-HTN | ENSG00000064999 | 6  | 152 | 17 | 5E+05 | 0.027647 | ANKS1A    | 0.430056667510549 | 1 |
| COPD-HTN | ENSG00000115318 | 2  | 16  | 4  | 5E+05 | 0.027602 | LOXL3     | 0.429719313       | 1 |
| COPD-HTN | ENSG00000128928 | 15 | 78  | 8  | 5E+05 | 0.027562 | IVD       | 0.42945929501268  | 1 |
| COPD-HTN | ENSG00000125378 | 14 | 15  | 3  | 5E+05 | 0.027559 | BMP4      | 0.42945929501268  | 1 |
| COPD-HTN | ENSG00000117479 | 1  | 31  | 9  | 5E+05 | 0.027542 | SLC19A2   | 0.42945929501268  | 1 |
| COPD-HTN | ENSG00000129245 | 17 | 33  | 8  | 5E+05 | 0.027513 | FXR2      | 0.42945929501268  | 1 |
| COPD-HTN | ENSG00000148180 | 9  | 225 | 20 | 5E+05 | 0.027512 | GSN       | 0.42945929501268  | 1 |
| COPD-HTN | ENSG00000118402 | 6  | 105 | 10 | 5E+05 | 0.027464 | ELOVL4    | 0.42945929501268  | 1 |
| COPD-HTN | ENSG00000242852 | 19 | 153 | 10 | 5E+05 | 0.027426 | ZNF709    | 0.42945929501268  | 1 |
| COPD-HTN | ENSG00000118849 | 3  | 104 | 12 | 5E+05 | 0.027392 | RARRES1   | 0.429350965986395 | 1 |
| COPD-HTN | ENSG00000165806 | 10 | 144 | 16 | 5E+05 | 0.027335 | CASP7     | 0.428822174468085 | 1 |
| COPD-HTN | ENSG00000136731 | 2  | 230 | 16 | 5E+05 | 0.027295 | UGGT1     | 0.428559399488927 | 1 |
| COPD-HTN | ENSG00000139977 | 14 | 19  | 4  | 5E+05 | 0.027295 | NAA30     | 0.428559399488927 | 1 |
| COPD-HTN | ENSG00000141720 | 17 | 59  | 11 | 5E+05 | 0.027275 | PIP4K2B   | 0.428559399488927 | 1 |
| COPD-HTN | ENSG00000161791 | 12 | 95  | 9  | 5E+05 | 0.027271 | FMNL3     | 0.428559399488927 | 1 |
| COPD-HTN | ENSG00000205517 | 19 | 78  | 8  | 5E+05 | 0.027251 | RGL3      | 0.428559399488927 | 1 |
| COPD-HTN | ENSG00000181718 | 11 | 12  | 4  | 5E+05 | 0.027226 | OR5T2     | 0.428559399488927 | 1 |
| COPD-HTN | ENSG00000115602 | 2  | 146 | 13 | 5E+05 | 0.027222 | IL1RL1    | 0.428559399488927 | 1 |

|          |                 |    |      |     |       |          |          |                   |   |
|----------|-----------------|----|------|-----|-------|----------|----------|-------------------|---|
| COPD-HTN | ENSG00000130703 | 20 | 147  | 15  | 5E+05 | 0.027211 | OSBPL2   | 0.428559399488927 | 1 |
| COPD-HTN | ENSG00000166529 | 7  | 16   | 3   | 5E+05 | 0.027208 | ZSCAN21  | 0.428559399488927 | 1 |
| COPD-HTN | ENSG00000166813 | 15 | 89   | 10  | 5E+05 | 0.027201 | KIF7     | 0.428559399488927 | 1 |
| COPD-HTN | ENSG00000147874 | 9  | 209  | 17  | 5E+05 | 0.02715  | HAUS6    | 0.428559399488927 | 1 |
| COPD-HTN | ENSG00000143217 | 1  | 36   | 9   | 5E+05 | 0.026979 | PVRL4    | 0.427604391229579 | 1 |
| COPD-HTN | ENSG00000116809 | 1  | 49   | 10  | 5E+05 | 0.026952 | ZBTB17   | 0.427544075731498 | 1 |
| COPD-HTN | ENSG00000047849 | 3  | 188  | 11  | 5E+05 | 0.026952 | MAP4     | 0.427544075731498 | 1 |
| COPD-HTN | ENSG00000128510 | 7  | 86   | 12  | 5E+05 | 0.026942 | CPA4     | 0.427544075731498 | 1 |
| COPD-HTN | ENSG00000107438 | 10 | 169  | 23  | 5E+05 | 0.026865 | PDLIM1   | 0.427267079378775 | 1 |
| COPD-HTN | ENSG00000163872 | 3  | 182  | 13  | 5E+05 | 0.026857 | YEATS2   | 0.427267079378775 | 1 |
| COPD-HTN | ENSG00000169760 | 3  | 2213 | 125 | 5E+05 | 0.026809 | NLGN1    | 0.427113480553155 | 1 |
| COPD-HTN | ENSG00000205189 | 8  | 71   | 11  | 5E+05 | 0.0268   | ZBTB10   | 0.427113480553155 | 1 |
| COPD-HTN | ENSG00000106246 | 7  | 91   | 11  | 5E+05 | 0.026741 | PTCD1    | 0.426767838095238 | 1 |
| COPD-HTN | ENSG00000110367 | 11 | 71   | 9   | 5E+05 | 0.026706 | DDX6     | 0.426578594454073 | 1 |
| COPD-HTN | ENSG00000140391 | 15 | 26   | 5   | 5E+05 | 0.026676 | TSPAN3   | 0.426468957502168 | 1 |
| COPD-HTN | ENSG00000136444 | 17 | 11   | 3   | 5E+05 | 0.026646 | RSAD1    | 0.426359130208333 | 1 |
| COPD-HTN | ENSG00000122779 | 7  | 167  | 18  | 5E+05 | 0.026525 | TRIM24   | 0.424791768027802 | 1 |
| COPD-HTN | ENSG00000166143 | 15 | 17   | 4   | 5E+05 | 0.026471 | PPP1R14D | 0.424295602608696 | 1 |
| COPD-HTN | ENSG00000173039 | 11 | 11   | 4   | 5E+05 | 0.026424 | RELA     | 0.423910872062663 | 1 |
| COPD-HTN | ENSG00000198646 | 20 | 173  | 12  | 5E+05 | 0.026418 | NCOA6    | 0.423910872062663 | 1 |
| COPD-HTN | ENSG00000091592 | 17 | 469  | 18  | 5E+05 | 0.026395 | NLRP1    | 0.423910872062663 | 1 |
| COPD-HTN | ENSG00000139436 | 12 | 115  | 15  | 5E+05 | 0.026345 | GIT2     | 0.42374989965096  | 1 |
| COPD-HTN | ENSG00000165124 | 9  | 741  | 59  | 5E+05 | 0.026336 | SVEP1    | 0.42374989965096  | 1 |
| COPD-HTN | ENSG00000108829 | 17 | 42   | 7   | 5E+05 | 0.026319 | LRRC59   | 0.42374989965096  | 1 |
| COPD-HTN | ENSG00000126790 | 14 | 71   | 9   | 5E+05 | 0.026306 | L3HYPDH  | 0.42374989965096  | 1 |
| COPD-HTN | ENSG00000165868 | 10 | 241  | 21  | 5E+05 | 0.02625  | HSPA12A  | 0.423700744308231 | 1 |
| COPD-HTN | ENSG00000133805 | 11 | 721  | 66  | 5E+05 | 0.026227 | AMPD3    | 0.423700517966696 | 1 |
| COPD-HTN | ENSG00000113389 | 5  | 261  | 25  | 5E+05 | 0.026188 | NPR3     | 0.42344158245614  | 1 |
| COPD-HTN | ENSG00000163618 | 3  | 1683 | 98  | 5E+05 | 0.026156 | CADPS    | 0.423295476733977 | 1 |
| COPD-HTN | ENSG00000115607 | 2  | 133  | 12  | 5E+05 | 0.026144 | IL18RAP  | 0.423295476733977 | 1 |
| COPD-HTN | ENSG00000091138 | 7  | 88   | 20  | 5E+05 | 0.026143 | SLC26A3  | 0.423295476733977 | 1 |
| COPD-HTN | ENSG00000178295 | 2  | 71   | 12  | 5E+05 | 0.026135 | GEN1     | 0.423295476733977 | 1 |
| COPD-HTN | ENSG00000142867 | 1  | 33   | 10  | 5E+05 | 0.026126 | BCL10    | 0.423295476733977 | 1 |

|          |                 |    |      |    |       |          |            |                   |   |
|----------|-----------------|----|------|----|-------|----------|------------|-------------------|---|
| COPD-HTN | ENSG00000117475 | 1  | 68   | 9  | 5E+05 | 0.026114 | BLZF1      | 0.423295476733977 | 1 |
| COPD-HTN | ENSG00000105427 | 19 | 3    | 1  | 5E+05 | 0.026079 | CNFN       | 0.423295476733977 | 1 |
| COPD-HTN | ENSG00000132510 | 17 | 18   | 5  | 5E+05 | 0.026063 | KDM6B      | 0.423295476733977 | 1 |
| COPD-HTN | ENSG00000171700 | 20 | 11   | 4  | 5E+05 | 0.026033 | RGS19      | 0.423295476733977 | 1 |
| COPD-HTN | ENSG00000180116 | 12 | 583  | 24 | 5E+05 | 0.026003 | C12orf40   | 0.423295476733977 | 1 |
| COPD-HTN | ENSG00000129965 | 11 | 74   | 16 | 5E+05 | 0.025996 | INS-IGF2   | 0.423295476733977 | 1 |
| COPD-HTN | ENSG00000035403 | 10 | 172  | 21 | 5E+05 | 0.025955 | VCL        | 0.423295476733977 | 1 |
| COPD-HTN | ENSG00000174943 | 16 | 34   | 5  | 5E+05 | 0.025938 | KCTD13     | 0.423295476733977 | 1 |
| COPD-HTN | ENSG00000196653 | 3  | 11   | 4  | 5E+05 | 0.025859 | ZNF502     | 0.423295476733977 | 1 |
| COPD-HTN | ENSG00000255073 | 11 | 70   | 11 | 5E+05 | 0.025802 | ZFP91-CNTF | 0.422762903111111 | 1 |
| COPD-HTN | ENSG00000173264 | 11 | 21   | 8  | 5E+05 | 0.025782 | GPR137     | 0.422762903111111 | 1 |
| COPD-HTN | ENSG00000139514 | 13 | 213  | 19 | 5E+05 | 0.025769 | SLC7A1     | 0.422762903111111 | 1 |
| COPD-HTN | ENSG00000117748 | 1  | 48   | 4  | 5E+05 | 0.025765 | RPA2       | 0.422762903111111 | 1 |
| COPD-HTN | ENSG00000197343 | 7  | 29   | 8  | 5E+05 | 0.025745 | ZNF655     | 0.422762903111111 | 1 |
| COPD-HTN | ENSG00000119559 | 19 | 27   | 5  | 5E+05 | 0.025687 | C19orf25   | 0.422757563392857 | 1 |
| COPD-HTN | ENSG00000101440 | 20 | 94   | 5  | 5E+05 | 0.025565 | ASIP       | 0.421125688114388 | 1 |
| COPD-HTN | ENSG00000160472 | 19 | 1    | 1  | 5E+05 | 0.025452 | TMEM190    | 0.419639280858676 | 1 |
| COPD-HTN | ENSG00000196586 | 6  | 271  | 16 | 5E+05 | 0.025423 | MYO6       | 0.419536400179051 | 1 |
| COPD-HTN | ENSG00000203883 | 20 | 1    | 1  | 5E+05 | 0.025394 | SOX18      | 0.419433335125448 | 1 |
| COPD-HTN | ENSG00000170927 | 6  | 1380 | 51 | 5E+05 | 0.025376 | PKHD1      | 0.419433335125448 | 1 |
| COPD-HTN | ENSG00000019995 | 10 | 74   | 7  | 5E+05 | 0.025331 | ZRANB1     | 0.419143916517056 | 1 |
| COPD-HTN | ENSG00000181333 | 11 | 166  | 14 | 5E+05 | 0.02528  | HEPHL1     | 0.418675867026056 | 1 |
| COPD-HTN | ENSG00000064601 | 20 | 16   | 3  | 5E+05 | 0.025229 | CTSA       | 0.418206975719424 | 1 |
| COPD-HTN | ENSG00000080709 | 5  | 281  | 31 | 5E+05 | 0.025161 | KCNN2      | 0.417455187218722 | 1 |
| COPD-HTN | ENSG00000179751 | 19 | 1    | 1  | 5E+05 | 0.025143 | SYCN       | 0.417455187218722 | 1 |
| COPD-HTN | ENSG00000149260 | 11 | 151  | 28 | 5E+05 | 0.025114 | CAPN5      | 0.417426836789901 | 1 |
| COPD-HTN | ENSG00000049449 | 11 | 652  | 59 | 5E+05 | 0.025093 | RCN1       | 0.417426836789901 | 1 |
| COPD-HTN | ENSG00000166140 | 15 | 14   | 2  | 5E+05 | 0.025092 | ZFYVE19    | 0.417426836789901 | 1 |
| COPD-HTN | ENSG00000161956 | 17 | 20   | 7  | 5E+05 | 0.025072 | SENP3      | 0.417426836789901 | 1 |
| COPD-HTN | ENSG00000214954 | 8  | 262  | 11 | 5E+05 | 0.025061 | LRRC69     | 0.417426836789901 | 1 |
| COPD-HTN | ENSG00000160752 | 1  | 11   | 2  | 5E+05 | 0.025052 | FDPS       | 0.417426836789901 | 1 |
| COPD-HTN | ENSG00000259030 | 1  | 601  | 45 | 5E+05 | 0.024995 | FPGT-TNNI3 | 0.417426836789901 | 1 |
| COPD-HTN | ENSG00000116783 | 1  | 601  | 45 | 5E+05 | 0.024995 | TNNI3K     | 0.417426836789901 | 1 |

|          |                 |    |     |    |       |          |             |                   |   |
|----------|-----------------|----|-----|----|-------|----------|-------------|-------------------|---|
| COPD-HTN | ENSG00000268656 | 2  | 8   | 3  | 5E+05 | 0.024952 | AC110084.1  | 0.417426836789901 | 1 |
| COPD-HTN | ENSG00000118557 | 16 | 136 | 14 | 5E+05 | 0.024906 | PMFBP1      | 0.417356634545455 | 1 |
| COPD-HTN | ENSG00000167531 | 12 | 3   | 2  | 5E+05 | 0.024902 | LALBA       | 0.417356634545455 | 1 |
| COPD-HTN | ENSG00000217236 | 2  | 14  | 5  | 5E+05 | 0.024887 | SP9         | 0.417356634545455 | 1 |
| COPD-HTN | ENSG00000165997 | 10 | 57  | 10 | 5E+05 | 0.024822 | ARL5B       | 0.417086532360985 | 1 |
| COPD-HTN | ENSG00000161328 | 11 | 83  | 14 | 5E+05 | 0.024815 | LRRC56      | 0.417086532360985 | 1 |
| COPD-HTN | ENSG00000178971 | 17 | 50  | 9  | 5E+05 | 0.024804 | CTC1        | 0.417086532360985 | 1 |
| COPD-HTN | ENSG00000163508 | 3  | 7   | 3  | 5E+05 | 0.024764 | EOMES       | 0.417086532360985 | 1 |
| COPD-HTN | ENSG00000169519 | 11 | 274 | 14 | 5E+05 | 0.024709 | METTL15     | 0.416707225068619 | 1 |
| COPD-HTN | ENSG00000139370 | 12 | 117 | 9  | 5E+05 | 0.024655 | SLC15A4     | 0.416177303113553 | 1 |
| COPD-HTN | ENSG00000160767 | 1  | 16  | 1  | 5E+05 | 0.02464  | FAM189B     | 0.416177303113553 | 1 |
| COPD-HTN | ENSG00000213445 | 11 | 20  | 7  | 5E+05 | 0.024605 | SIPA1       | 0.416095380733945 | 1 |
| COPD-HTN | ENSG00000136828 | 9  | 447 | 17 | 5E+05 | 0.024557 | RALGPS1     | 0.415664996326905 | 1 |
| COPD-HTN | ENSG00000248919 | 7  | 80  | 9  | 5E+05 | 0.024527 | ATP5J2-PTCI | 0.415538778492647 | 1 |
| COPD-HTN | ENSG00000100884 | 14 | 11  | 5  | 5E+05 | 0.024525 | CPNE6       | 0.415538778492647 | 1 |
| COPD-HTN | ENSG00000266118 | 2  | 205 | 22 | 5E+05 | 0.024386 | RP11-507M3  | 0.413910808471455 | 1 |
| COPD-HTN | ENSG00000183657 | 3  | 57  | 7  | 5E+05 | 0.024374 | PP13439     | 0.413910808471455 | 1 |
| COPD-HTN | ENSG00000168490 | 8  | 36  | 12 | 5E+05 | 0.024254 | PHYHIP      | 0.412429872693727 | 1 |
| COPD-HTN | ENSG00000197361 | 15 | 10  | 4  | 5E+05 | 0.024191 | FBXL22      | 0.411738414589104 | 1 |
| COPD-HTN | ENSG00000134571 | 11 | 41  | 11 | 5E+05 | 0.02417  | MYBPC3      | 0.411738414589104 | 1 |
| COPD-HTN | ENSG00000136694 | 2  | 6   | 2  | 5E+05 | 0.024037 | IL36A       | 0.409874209990749 | 1 |
| COPD-HTN | ENSG00000117676 | 1  | 89  | 11 | 5E+05 | 0.02402  | RPS6KA1     | 0.409874209990749 | 1 |
| COPD-HTN | ENSG00000253729 | 8  | 131 | 17 | 5E+05 | 0.023975 | PRKDC       | 0.409574768303985 | 1 |
| COPD-HTN | ENSG00000171017 | 19 | 35  | 6  | 5E+05 | 0.023965 | LRRC8E      | 0.409574768303985 | 1 |
| COPD-HTN | ENSG00000167658 | 19 | 25  | 7  | 5E+05 | 0.023937 | EEF2        | 0.409574768303985 | 1 |
| COPD-HTN | ENSG00000244694 | 6  | 500 | 39 | 5E+05 | 0.023896 | PTCHD4      | 0.409363353159851 | 1 |
| COPD-HTN | ENSG00000268863 | 16 | 2   | 1  | 5E+05 | 0.02381  | AC135048.1  | 0.40826951627907  | 1 |
| COPD-HTN | ENSG00000156284 | 21 | 4   | 2  | 5E+05 | 0.023734 | CLDN8       | 0.407345271880819 | 1 |
| COPD-HTN | ENSG00000092439 | 15 | 379 | 15 | 5E+05 | 0.023596 | TRPM7       | 0.405354210624418 | 1 |
| COPD-HTN | ENSG00000109180 | 4  | 45  | 6  | 5E+05 | 0.023546 | OCIAD1      | 0.40487259141791  | 1 |
| COPD-HTN | ENSG00000142655 | 1  | 339 | 23 | 5E+05 | 0.023509 | PEX14       | 0.404613816059757 | 1 |
| COPD-HTN | ENSG00000169992 | 17 | 34  | 14 | 5E+05 | 0.023505 | NLGN2       | 0.404613816059757 | 1 |
| COPD-HTN | ENSG00000108094 | 10 | 168 | 8  | 5E+05 | 0.023464 | CUL2        | 0.404594866230122 | 1 |

|          |                 |    |     |    |       |          |            |                   |   |
|----------|-----------------|----|-----|----|-------|----------|------------|-------------------|---|
| COPD-HTN | ENSG00000120656 | 1  | 54  | 8  | 5E+05 | 0.023435 | TAF12      | 0.404473178838951 | 1 |
| COPD-HTN | ENSG00000164626 | 6  | 129 | 23 | 5E+05 | 0.023358 | KCNK5      | 0.403522037488285 | 1 |
| COPD-HTN | ENSG00000178718 | 15 | 1   | 1  | 5E+05 | 0.023347 | RPP25      | 0.403522037488285 | 1 |
| COPD-HTN | ENSG00000168779 | 3  | 26  | 4  | 5E+05 | 0.023272 | SHOX2      | 0.402791338967136 | 1 |
| COPD-HTN | ENSG00000165102 | 8  | 65  | 14 | 5E+05 | 0.023157 | HGSNAT     | 0.401177613721805 | 1 |
| COPD-HTN | ENSG00000164346 | 5  | 20  | 4  | 5E+05 | 0.023067 | NSA2       | 0.399994365945437 | 1 |
| COPD-HTN | ENSG00000268821 | 2  | 8   | 3  | 5E+05 | 0.022999 | AC068039.1 | 0.399190741054614 | 1 |
| COPD-HTN | ENSG00000108306 | 17 | 261 | 9  | 5E+05 | 0.022975 | FBXL20     | 0.399150023562677 | 1 |
| COPD-HTN | ENSG00000001617 | 3  | 57  | 8  | 5E+05 | 0.022943 | SEMA3F     | 0.398970112264151 | 1 |
| COPD-HTN | ENSG00000119979 | 10 | 71  | 3  | 5E+05 | 0.022908 | FAM45A     | 0.39873764305949  | 1 |
| COPD-HTN | ENSG00000233438 | 2  | 43  | 6  | 5E+05 | 0.022879 | AC109829.1 | 0.398609269376181 | 1 |
| COPD-HTN | ENSG00000063046 | 12 | 95  | 6  | 5E+05 | 0.022818 | EIF4B      | 0.397922605487228 | 1 |
| COPD-HTN | ENSG00000075131 | 15 | 116 | 18 | 5E+05 | 0.022812 | TIPIN      | 0.397922605487228 | 1 |
| COPD-HTN | ENSG00000169951 | 16 | 4   | 2  | 5E+05 | 0.022786 | ZNF764     | 0.397922605487228 | 1 |
| COPD-HTN | ENSG00000138073 | 2  | 8   | 3  | 5E+05 | 0.022758 | PREB       | 0.397922605487228 | 1 |
| COPD-HTN | ENSG00000116396 | 1  | 190 | 20 | 5E+05 | 0.022691 | KCNC4      | 0.397211018993352 | 1 |
| COPD-HTN | ENSG00000117834 | 1  | 42  | 9  | 5E+05 | 0.022674 | SLC5A9     | 0.397211018993352 | 1 |
| COPD-HTN | ENSG00000212670 | 1  | 3   | 1  | 5E+05 | 0.022657 | AL161915.1 | 0.397211018993352 | 1 |
| COPD-HTN | ENSG00000145700 | 5  | 393 | 13 | 5E+05 | 0.022622 | ANKRD31    | 0.397134596190476 | 1 |
| COPD-HTN | ENSG00000095794 | 10 | 167 | 7  | 5E+05 | 0.02261  | CREM       | 0.397134596190476 | 1 |
| COPD-HTN | ENSG00000196826 | 19 | 226 | 21 | 5E+05 | 0.022593 | ZNF709     | 0.397134596190476 | 1 |
| COPD-HTN | ENSG00000123352 | 12 | 301 | 18 | 5E+05 | 0.02258  | SPATS2     | 0.397134596190476 | 1 |
| COPD-HTN | ENSG00000127995 | 7  | 80  | 9  | 5E+05 | 0.022568 | CASD1      | 0.397134596190476 | 1 |
| COPD-HTN | ENSG00000189050 | 17 | 21  | 5  | 5E+05 | 0.022549 | RNFT1      | 0.397134596190476 | 1 |
| COPD-HTN | ENSG00000174236 | 12 | 2   | 1  | 5E+05 | 0.022536 | REP15      | 0.397134596190476 | 1 |
| COPD-HTN | ENSG00000241468 | 7  | 36  | 6  | 5E+05 | 0.022498 | ATP5J2     | 0.397134596190476 | 1 |
| COPD-HTN | ENSG00000131061 | 20 | 78  | 11 | 5E+05 | 0.022496 | ZNF341     | 0.397134596190476 | 1 |
| COPD-HTN | ENSG00000213516 | 1  | 12  | 6  | 5E+05 | 0.022467 | RBMXL1     | 0.397134596190476 | 1 |
| COPD-HTN | ENSG00000064932 | 19 | 206 | 27 | 5E+05 | 0.022278 | SBNO2      | 0.394856128846154 | 1 |
| COPD-HTN | ENSG00000171695 | 20 | 3   | 1  | 5E+05 | 0.022145 | C20orf201  | 0.392876597690087 | 1 |
| COPD-HTN | ENSG00000081019 | 1  | 60  | 11 | 5E+05 | 0.022089 | RSBN1      | 0.392260632947977 | 1 |
| COPD-HTN | ENSG00000204876 | 7  | 7   | 2  | 5E+05 | 0.022065 | AC021218.2 | 0.392212290260366 | 1 |
| COPD-HTN | ENSG00000079432 | 19 | 22  | 3  | 5E+05 | 0.022051 | CIC        | 0.392212290260366 | 1 |

|          |                 |    |      |    |       |          |               |                   |   |
|----------|-----------------|----|------|----|-------|----------|---------------|-------------------|---|
| COPD-HTN | ENSG00000253250 | 8  | 40   | 6  | 5E+05 | 0.022023 | C8orf88       | 0.392212290260366 | 1 |
| COPD-HTN | ENSG00000173641 | 1  | 46   | 5  | 5E+05 | 0.021971 | HSPB7         | 0.39167450967118  | 1 |
| COPD-HTN | ENSG00000187187 | 19 | 54   | 4  | 5E+05 | 0.02197  | ZNF546        | 0.39167450967118  | 1 |
| COPD-HTN | ENSG00000066382 | 11 | 471  | 34 | 5E+05 | 0.021913 | MPED2         | 0.391397605620155 | 1 |
| COPD-HTN | ENSG00000137154 | 9  | 10   | 3  | 5E+05 | 0.021907 | RPS6          | 0.391397605620155 | 1 |
| COPD-HTN | ENSG00000148204 | 9  | 68   | 12 | 5E+05 | 0.021862 | CRB2          | 0.391244899029126 | 1 |
| COPD-HTN | ENSG00000186094 | 1  | 1933 | 51 | 5E+05 | 0.021846 | AGBL4         | 0.391244899029126 | 1 |
| COPD-HTN | ENSG00000250038 | 4  | 103  | 11 | 5E+05 | 0.021831 | RP11-180C1.10 | 0.391244899029126 | 1 |
| COPD-HTN | ENSG00000166106 | 11 | 59   | 12 | 5E+05 | 0.021806 | ADAMTS15      | 0.391244899029126 | 1 |
| COPD-HTN | ENSG00000143207 | 1  | 448  | 21 | 5E+05 | 0.021795 | RFWD2         | 0.391244899029126 | 1 |
| COPD-HTN | ENSG00000100249 | 22 | 7    | 4  | 5E+05 | 0.021794 | C22orf31      | 0.391244899029126 | 1 |
| COPD-HTN | ENSG00000115977 | 2  | 228  | 19 | 5E+05 | 0.021687 | AAK1          | 0.390387178710938 | 1 |
| COPD-HTN | ENSG00000151422 | 5  | 1453 | 45 | 5E+05 | 0.021658 | FER           | 0.390246250244379 | 1 |
| COPD-HTN | ENSG00000153165 | 2  | 8    | 4  | 5E+05 | 0.021657 | RGPD3         | 0.390246250244379 | 1 |
| COPD-HTN | ENSG00000111642 | 12 | 70   | 8  | 5E+05 | 0.021604 | CHD4          | 0.390035780607248 | 1 |
| COPD-HTN | ENSG00000115252 | 2  | 901  | 40 | 5E+05 | 0.021565 | PDE1A         | 0.38971337745098  | 1 |
| COPD-HTN | ENSG00000179909 | 19 | 31   | 7  | 5E+05 | 0.021532 | ZNF154        | 0.389498877330716 | 1 |
| COPD-HTN | ENSG00000257138 | 7  | 3    | 1  | 5E+05 | 0.021518 | TAS2R38       | 0.389498877330716 | 1 |
| COPD-HTN | ENSG00000186193 | 9  | 22   | 4  | 5E+05 | 0.021482 | SAPCD2        | 0.389358609636185 | 1 |
| COPD-HTN | ENSG00000130734 | 19 | 22   | 6  | 5E+05 | 0.021476 | ATG4D         | 0.389358609636185 | 1 |
| COPD-HTN | ENSG00000154127 | 11 | 475  | 68 | 5E+05 | 0.02145  | UBASH3B       | 0.389358609636185 | 1 |
| COPD-HTN | ENSG00000137575 | 8  | 43   | 3  | 5E+05 | 0.021398 | SDCBP         | 0.388983564102564 | 1 |
| COPD-HTN | ENSG00000180347 | 7  | 404  | 29 | 5E+05 | 0.021357 | CCDC129       | 0.38862150148075  | 1 |
| COPD-HTN | ENSG00000136381 | 15 | 57   | 9  | 5E+05 | 0.021357 | IREB2         | 0.38862150148075  | 1 |
| COPD-HTN | ENSG00000116871 | 1  | 27   | 5  | 5E+05 | 0.021341 | MAP7D1        | 0.38862150148075  | 1 |
| COPD-HTN | ENSG00000061794 | 12 | 83   | 11 | 5E+05 | 0.021314 | MRPS35        | 0.38862150148075  | 1 |
| COPD-HTN | ENSG00000124203 | 20 | 141  | 25 | 5E+05 | 0.021297 | ZNF831        | 0.38862150148075  | 1 |
| COPD-HTN | ENSG00000212734 | 17 | 4    | 1  | 5E+05 | 0.021245 | C17orf100     | 0.388501076388889 | 1 |
| COPD-HTN | ENSG00000272647 | 7  | 75   | 11 | 5E+05 | 0.021195 | GS1-259H13.10 | 0.387971633565045 | 1 |
| COPD-HTN | ENSG00000186660 | 11 | 66   | 11 | 5E+05 | 0.021168 | ZFP91         | 0.387862568588469 | 1 |
| COPD-HTN | ENSG00000222022 | 2  | 2    | 1  | 5E+05 | 0.021142 | AC112721.1    | 0.387771627860697 | 1 |
| COPD-HTN | ENSG00000174279 | 2  | 8    | 3  | 5E+05 | 0.021127 | EVX2          | 0.387771627860697 | 1 |
| COPD-HTN | ENSG00000088305 | 20 | 122  | 9  | 5E+05 | 0.021122 | DNMT3B        | 0.387771627860697 | 1 |

|          |                 |    |      |    |       |          |              |                   |   |
|----------|-----------------|----|------|----|-------|----------|--------------|-------------------|---|
| COPD-HTN | ENSG00000147684 | 8  | 118  | 18 | 5E+05 | 0.02106  | NDUFB9       | 0.387424131736527 | 1 |
| COPD-HTN | ENSG00000135547 | 6  | 22   | 3  | 5E+05 | 0.021047 | HEY2         | 0.387424131736527 | 1 |
| COPD-HTN | ENSG00000180929 | 3  | 3    | 2  | 5E+05 | 0.021042 | GPR62        | 0.387424131736527 | 1 |
| COPD-HTN | ENSG00000023892 | 6  | 40   | 7  | 5E+05 | 0.021036 | DEF6         | 0.387424131736527 | 1 |
| COPD-HTN | ENSG00000157404 | 4  | 174  | 23 | 5E+05 | 0.02101  | KIT          | 0.387424131736527 | 1 |
| COPD-HTN | ENSG00000187017 | 1  | 100  | 11 | 5E+05 | 0.021004 | ESPN         | 0.387424131736527 | 1 |
| COPD-HTN | ENSG00000065308 | 6  | 302  | 26 | 5E+05 | 0.020988 | TRAM2        | 0.387424131736527 | 1 |
| COPD-HTN | ENSG00000100461 | 14 | 43   | 5  | 5E+05 | 0.020962 | RBM23        | 0.387424131736527 | 1 |
| COPD-HTN | ENSG00000164933 | 8  | 53   | 7  | 5E+05 | 0.020925 | SLC25A32     | 0.387424131736527 | 1 |
| COPD-HTN | ENSG00000136944 | 9  | 229  | 34 | 5E+05 | 0.020918 | LMX1B        | 0.387424131736527 | 1 |
| COPD-HTN | ENSG00000165553 | 14 | 8    | 4  | 5E+05 | 0.020878 | NGB          | 0.387424131736527 | 1 |
| COPD-HTN | ENSG00000108786 | 17 | 12   | 2  | 5E+05 | 0.020839 | HSD17B1      | 0.387424131736527 | 1 |
| COPD-HTN | ENSG00000103479 | 16 | 97   | 6  | 5E+05 | 0.020819 | RBL2         | 0.387424131736527 | 1 |
| COPD-HTN | ENSG00000110075 | 11 | 211  | 11 | 5E+05 | 0.020798 | PPP6R3       | 0.387424131736527 | 1 |
| COPD-HTN | ENSG00000119689 | 14 | 49   | 7  | 5E+05 | 0.02074  | DLST         | 0.386943744939271 | 1 |
| COPD-HTN | ENSG00000183379 | 14 | 52   | 7  | 5E+05 | 0.020719 | SYNDIGIL     | 0.386943593718338 | 1 |
| COPD-HTN | ENSG00000164934 | 8  | 68   | 8  | 5E+05 | 0.020682 | DCAF13       | 0.386644326572008 | 1 |
| COPD-HTN | ENSG00000127616 | 19 | 266  | 19 | 5E+05 | 0.02066  | SMARCA4      | 0.386625157360406 | 1 |
| COPD-HTN | ENSG00000101470 | 20 | 26   | 5  | 5E+05 | 0.020635 | TNNC2        | 0.38654975101626  | 1 |
| COPD-HTN | ENSG00000111252 | 12 | 34   | 4  | 5E+05 | 0.020633 | SH2B3        | 0.38654975101626  | 1 |
| COPD-HTN | ENSG00000166797 | 15 | 49   | 6  | 5E+05 | 0.020603 | FAM96A       | 0.38654975101626  | 1 |
| COPD-HTN | ENSG00000204764 | 5  | 754  | 16 | 5E+05 | 0.020593 | RANBP17      | 0.38654975101626  | 1 |
| COPD-HTN | ENSG00000172992 | 17 | 89   | 12 | 5E+05 | 0.020589 | DCAKD        | 0.38654975101626  | 1 |
| COPD-HTN | ENSG00000140534 | 15 | 119  | 10 | 5E+05 | 0.020355 | TICRR        | 0.383252007150153 | 1 |
| COPD-HTN | ENSG00000114554 | 3  | 135  | 16 | 5E+05 | 0.020342 | PLXNA1       | 0.383252007150153 | 1 |
| COPD-HTN | ENSG00000084234 | 11 | 214  | 14 | 5E+05 | 0.020302 | APLP2        | 0.383036607983623 | 1 |
| COPD-HTN | ENSG00000198522 | 2  | 40   | 6  | 5E+05 | 0.020269 | GPN1         | 0.382805816598361 | 1 |
| COPD-HTN | ENSG00000178209 | 8  | 142  | 7  | 5E+05 | 0.020046 | PLEC         | 0.37898248        | 1 |
| COPD-HTN | ENSG00000173064 | 12 | 202  | 15 | 5E+05 | 0.019991 | HECTD4       | 0.378330701232033 | 1 |
| COPD-HTN | ENSG00000160145 | 3  | 1754 | 87 | 5E+05 | 0.019959 | KALRN        | 0.37811330626927  | 1 |
| COPD-HTN | ENSG00000257184 | 7  | 23   | 7  | 5E+05 | 0.019907 | RP1-170O19.2 | 0.377516184156379 | 1 |
| COPD-HTN | ENSG00000084676 | 2  | 574  | 24 | 5E+05 | 0.019797 | NCOA1        | 0.37581678784758  | 1 |
| COPD-HTN | ENSG00000188368 | 19 | 5    | 1  | 5E+05 | 0.019786 | PRR19        | 0.37581678784758  | 1 |

|          |                 |    |     |    |       |          |             |                   |   |
|----------|-----------------|----|-----|----|-------|----------|-------------|-------------------|---|
| COPD-HTN | ENSG00000158792 | 16 | 15  | 4  | 5E+05 | 0.019757 | SPATA2L     | 0.37581678784758  | 1 |
| COPD-HTN | ENSG00000160097 | 1  | 10  | 3  | 5E+05 | 0.019747 | FNDC5       | 0.37581678784758  | 1 |
| COPD-HTN | ENSG00000135549 | 6  | 561 | 34 | 5E+05 | 0.019704 | PKIB        | 0.375598585315408 | 1 |
| COPD-HTN | ENSG00000078399 | 7  | 16  | 6  | 5E+05 | 0.019628 | HOXA9       | 0.374537188405797 | 1 |
| COPD-HTN | ENSG00000177479 | 3  | 55  | 8  | 5E+05 | 0.019613 | ARIH2       | 0.374537188405797 | 1 |
| COPD-HTN | ENSG00000269242 | 19 | 2   | 1  | 5E+05 | 0.019574 | CTD-2192J16 | 0.374281682572614 | 1 |
| COPD-HTN | ENSG00000176022 | 1  | 7   | 2  | 5E+05 | 0.019512 | B3GALT6     | 0.373483588785047 | 1 |
| COPD-HTN | ENSG00000163154 | 1  | 3   | 1  | 5E+05 | 0.019496 | TNFAIP8L2   | 0.373483588785047 | 1 |
| COPD-HTN | ENSG00000134201 | 1  | 140 | 22 | 5E+05 | 0.019482 | GSTM5       | 0.373483588785047 | 1 |
| COPD-HTN | ENSG00000143033 | 1  | 85  | 10 | 5E+05 | 0.019479 | MTF2        | 0.373483588785047 | 1 |
| COPD-HTN | ENSG00000136541 | 2  | 5   | 3  | 5E+05 | 0.019402 | ERMN        | 0.372927076120959 | 1 |
| COPD-HTN | ENSG00000176160 | 17 | 79  | 12 | 5E+05 | 0.019355 | HSF5        | 0.372412019832985 | 1 |
| COPD-HTN | ENSG00000173545 | 5  | 26  | 5  | 5E+05 | 0.019336 | ZNF622      | 0.372412019832985 | 1 |
| COPD-HTN | ENSG00000125820 | 20 | 5   | 2  | 5E+05 | 0.019245 | NKX2-2      | 0.371070172594142 | 1 |
| COPD-HTN | ENSG00000103966 | 15 | 194 | 26 | 5E+05 | 0.019239 | EHD4        | 0.371070172594142 | 1 |
| COPD-HTN | ENSG00000253368 | 1  | 5   | 2  | 5E+05 | 0.019236 | TRNP1       | 0.371070172594142 | 1 |
| COPD-HTN | ENSG00000128694 | 2  | 19  | 5  | 5E+05 | 0.019222 | OSGEPL1     | 0.371070172594142 | 1 |
| COPD-HTN | ENSG00000251493 | 5  | 3   | 2  | 5E+05 | 0.019204 | FOXD1       | 0.371070172594142 | 1 |
| COPD-HTN | ENSG00000186766 | 10 | 6   | 1  | 5E+05 | 0.019196 | FOXI2       | 0.371070172594142 | 1 |
| COPD-HTN | ENSG00000153904 | 1  | 637 | 54 | 5E+05 | 0.019193 | DDAH1       | 0.371070172594142 | 1 |
| COPD-HTN | ENSG00000185313 | 3  | 294 | 25 | 5E+05 | 0.019175 | SCN10A      | 0.371070172594142 | 1 |
| COPD-HTN | ENSG00000159708 | 16 | 96  | 10 | 5E+05 | 0.019132 | LRRC36      | 0.371070172594142 | 1 |
| COPD-HTN | ENSG00000180329 | 17 | 14  | 5  | 5E+05 | 0.019131 | CCDC43      | 0.371070172594142 | 1 |
| COPD-HTN | ENSG00000172269 | 11 | 28  | 5  | 5E+05 | 0.019123 | DPAGT1      | 0.371070172594142 | 1 |
| COPD-HTN | ENSG00000143702 | 1  | 139 | 13 | 5E+05 | 0.019116 | CEP170      | 0.371070172594142 | 1 |
| COPD-HTN | ENSG00000113318 | 5  | 573 | 23 | 5E+05 | 0.019114 | MSH3        | 0.371070172594142 | 1 |
| COPD-HTN | ENSG00000154511 | 1  | 145 | 6  | 5E+05 | 0.019098 | FAM69A      | 0.371070172594142 | 1 |
| COPD-HTN | ENSG00000166526 | 7  | 32  | 9  | 5E+05 | 0.019004 | ZNF3        | 0.371070172594142 | 1 |
| COPD-HTN | ENSG00000198836 | 3  | 236 | 14 | 5E+05 | 0.018992 | OPA1        | 0.371070172594142 | 1 |
| COPD-HTN | ENSG00000168228 | 4  | 148 | 17 | 5E+05 | 0.018909 | ZCCHC4      | 0.370797443617021 | 1 |
| COPD-HTN | ENSG00000178467 | 3  | 11  | 3  | 5E+05 | 0.01885  | P4HTM       | 0.370034132055378 | 1 |
| COPD-HTN | ENSG00000125899 | 20 | 3   | 2  | 5E+05 | 0.018794 | C20orf187   | 0.369328147121535 | 1 |
| COPD-HTN | ENSG00000125743 | 19 | 6   | 2  | 5E+05 | 0.018783 | SNRPD2      | 0.369328147121535 | 1 |

|          |                 |    |     |    |       |          |           |                   |   |
|----------|-----------------|----|-----|----|-------|----------|-----------|-------------------|---|
| COPD-HTN | ENSG00000180828 | 8  | 4   | 2  | 5E+05 | 0.01875  | BHLHE22   | 0.369250801282051 | 1 |
| COPD-HTN | ENSG00000068001 | 3  | 1   | 1  | 5E+05 | 0.01872  | HYAL2     | 0.369054288770053 | 1 |
| COPD-HTN | ENSG00000182631 | 5  | 2   | 1  | 5E+05 | 0.018708 | RXFP3     | 0.369054288770053 | 1 |
| COPD-HTN | ENSG00000103064 | 16 | 53  | 8  | 5E+05 | 0.018614 | SLC7A6    | 0.367751191854234 | 1 |
| COPD-HTN | ENSG00000175115 | 11 | 263 | 13 | 5E+05 | 0.01852  | PACS1     | 0.366286652360515 | 1 |
| COPD-HTN | ENSG00000137760 | 11 | 182 | 18 | 5E+05 | 0.018499 | ALKBH8    | 0.366264303974221 | 1 |
| COPD-HTN | ENSG00000173875 | 19 | 36  | 4  | 5E+05 | 0.018478 | ZNF791    | 0.366241907526882 | 1 |
| COPD-HTN | ENSG00000184599 | 1  | 16  | 4  | 5E+05 | 0.018444 | FAM19A3   | 0.365961519913886 | 1 |
| COPD-HTN | ENSG00000100401 | 22 | 78  | 10 | 5E+05 | 0.018424 | RANGAP1   | 0.365958612068966 | 1 |
| COPD-HTN | ENSG00000175193 | 3  | 157 | 16 | 5E+05 | 0.018385 | PARL      | 0.365577891046386 | 1 |
| COPD-HTN | ENSG00000138138 | 10 | 139 | 8  | 5E+05 | 0.018303 | ATAD1     | 0.364340387688985 | 1 |
| COPD-HTN | ENSG00000137880 | 15 | 2   | 1  | 5E+05 | 0.018278 | GCHFR     | 0.36423608        | 1 |
| COPD-HTN | ENSG00000166508 | 7  | 21  | 4  | 5E+05 | 0.018231 | MCM7      | 0.363692665584416 | 1 |
| COPD-HTN | ENSG00000141002 | 16 | 95  | 5  | 5E+05 | 0.018207 | TCF25     | 0.363607400866739 | 1 |
| COPD-HTN | ENSG00000165813 | 10 | 93  | 9  | 5E+05 | 0.01815  | C10orf118 | 0.362862201735358 | 1 |
| COPD-HTN | ENSG00000070961 | 12 | 175 | 19 | 5E+05 | 0.018141 | ATP2B1    | 0.362862201735358 | 1 |
| COPD-HTN | ENSG00000132793 | 20 | 48  | 11 | 5E+05 | 0.01813  | LPIN3     | 0.362862201735358 | 1 |
| COPD-HTN | ENSG00000114670 | 3  | 607 | 28 | 5E+05 | 0.018111 | NEK11     | 0.362862201735358 | 1 |
| COPD-HTN | ENSG00000092969 | 1  | 191 | 33 | 5E+05 | 0.018026 | TGFB2     | 0.361953440087146 | 1 |
| COPD-HTN | ENSG00000204604 | 19 | 75  | 9  | 5E+05 | 0.018025 | ZNF468    | 0.361953440087146 | 1 |
| COPD-HTN | ENSG00000152527 | 2  | 462 | 38 | 5E+05 | 0.018    | PLEKHH2   | 0.361953440087146 | 1 |
| COPD-HTN | ENSG00000196652 | 7  | 39  | 8  | 5E+05 | 0.017985 | ZKSCAN5   | 0.361953440087146 | 1 |
| COPD-HTN | ENSG00000184178 | 4  | 885 | 53 | 5E+05 | 0.017956 | SCFD2     | 0.361953440087146 | 1 |
| COPD-HTN | ENSG00000136448 | 17 | 164 | 16 | 5E+05 | 0.01794  | NMT1      | 0.361953440087146 | 1 |
| COPD-HTN | ENSG00000235750 | 1  | 100 | 11 | 5E+05 | 0.017929 | KIAA0040  | 0.361953440087146 | 1 |
| COPD-HTN | ENSG00000196693 | 10 | 90  | 9  | 5E+05 | 0.017927 | ZNF33B    | 0.361953440087146 | 1 |
| COPD-HTN | ENSG00000178882 | 12 | 936 | 75 | 5E+05 | 0.017925 | FAM101A   | 0.361953440087146 | 1 |
| COPD-HTN | ENSG00000174684 | 11 | 1   | 1  | 5E+05 | 0.017898 | B3GNT1    | 0.361953440087146 | 1 |
| COPD-HTN | ENSG00000149262 | 11 | 240 | 17 | 5E+05 | 0.017878 | INTS4     | 0.361953440087146 | 1 |
| COPD-HTN | ENSG00000116604 | 1  | 60  | 8  | 5E+05 | 0.017829 | MEF2D     | 0.361953440087146 | 1 |
| COPD-HTN | ENSG00000128699 | 2  | 30  | 5  | 5E+05 | 0.017812 | ORMDL1    | 0.361953440087146 | 1 |
| COPD-HTN | ENSG00000051382 | 3  | 211 | 9  | 5E+05 | 0.01776  | PIK3CB    | 0.361734895027624 | 1 |
| COPD-HTN | ENSG00000185290 | 7  | 1   | 1  | 5E+05 | 0.017697 | NUPR1L    | 0.360850443584071 | 1 |

|          |                 |    |      |     |       |          |             |                   |   |
|----------|-----------------|----|------|-----|-------|----------|-------------|-------------------|---|
| COPD-HTN | ENSG0000048471  | 16 | 2174 | 101 | 5E+05 | 0.017605 | SNX29       | 0.359372054263566 | 1 |
| COPD-HTN | ENSG00000130368 | 6  | 1    | 1   | 5E+05 | 0.017592 | MAS1        | 0.359372054263566 | 1 |
| COPD-HTN | ENSG00000109184 | 4  | 80   | 9   | 5E+05 | 0.017523 | DCUN1D4     | 0.358492185349612 | 1 |
| COPD-HTN | ENSG00000173153 | 11 | 9    | 4   | 5E+05 | 0.017516 | ESRRA       | 0.358492185349612 | 1 |
| COPD-HTN | ENSG00000143365 | 1  | 55   | 11  | 5E+05 | 0.01749  | RORC        | 0.358492185349612 | 1 |
| COPD-HTN | ENSG00000099625 | 19 | 18   | 5   | 5E+05 | 0.017439 | C19orf26    | 0.357965575723831 | 1 |
| COPD-HTN | ENSG00000166971 | 16 | 16   | 3   | 5E+05 | 0.017436 | AKTIP       | 0.357965575723831 | 1 |
| COPD-HTN | ENSG00000133056 | 1  | 154  | 15  | 5E+05 | 0.017389 | PIK3C2B     | 0.357735978794643 | 1 |
| COPD-HTN | ENSG00000266956 | 17 | 20   | 3   | 5E+05 | 0.017367 | CTB-186H2.3 | 0.357682582122905 | 1 |
| COPD-HTN | ENSG00000173113 | 11 | 3    | 1   | 5E+05 | 0.017341 | TRMT112     | 0.357546591722595 | 1 |
| COPD-HTN | ENSG00000155099 | 8  | 77   | 10  | 5E+05 | 0.017324 | TMEM55A     | 0.357546591722595 | 1 |
| COPD-HTN | ENSG00000016391 | 3  | 92   | 19  | 5E+05 | 0.017317 | CHDH        | 0.357546591722595 | 1 |
| COPD-HTN | ENSG00000213413 | 7  | 9    | 3   | 5E+05 | 0.017245 | PVRIG       | 0.356764405162739 | 1 |
| COPD-HTN | ENSG00000102970 | 16 | 42   | 11  | 5E+05 | 0.017238 | CCL17       | 0.356764405162739 | 1 |
| COPD-HTN | ENSG00000234560 | 11 | 1    | 1   | 5E+05 | 0.017124 | OR10G8      | 0.355058146231721 | 1 |
| COPD-HTN | ENSG00000163792 | 2  | 5    | 2   | 5E+05 | 0.017043 | TCF23       | 0.353776597972973 | 1 |
| COPD-HTN | ENSG00000197261 | 6  | 47   | 6   | 5E+05 | 0.016971 | C6orf141    | 0.352679191657272 | 1 |
| COPD-HTN | ENSG00000173250 | 5  | 4    | 2   | 5E+05 | 0.016867 | GPR151      | 0.350913556433409 | 1 |
| COPD-HTN | ENSG00000151617 | 4  | 107  | 11  | 5E+05 | 0.016849 | EDNRA       | 0.350913556433409 | 1 |
| COPD-HTN | ENSG00000168071 | 11 | 39   | 8   | 5E+05 | 0.016786 | CCDC88B     | 0.350018481900452 | 1 |
| COPD-HTN | ENSG00000174804 | 11 | 8    | 4   | 5E+05 | 0.016742 | FZD4        | 0.3494963601359   | 1 |
| COPD-HTN | ENSG00000198146 | 15 | 10   | 4   | 5E+05 | 0.016726 | ZNF770      | 0.3494963601359   | 1 |
| COPD-HTN | ENSG00000140153 | 14 | 135  | 14  | 5E+05 | 0.016725 | WDR20       | 0.3494963601359   | 1 |
| COPD-HTN | ENSG00000128944 | 15 | 31   | 5   | 5E+05 | 0.016719 | KNSTRN      | 0.3494963601359   | 1 |
| COPD-HTN | ENSG00000105429 | 19 | 53   | 3   | 5E+05 | 0.01667  | MEGF8       | 0.3494963601359   | 1 |
| COPD-HTN | ENSG00000184117 | 22 | 63   | 7   | 5E+05 | 0.016624 | NIPSNAP1    | 0.349009330296128 | 1 |
| COPD-HTN | ENSG00000112200 | 6  | 90   | 8   | 5E+05 | 0.016596 | ZNF451      | 0.348818777651083 | 1 |
| COPD-HTN | ENSG00000122574 | 7  | 340  | 30  | 5E+05 | 0.01656  | WIPF3       | 0.348459452054795 | 1 |
| COPD-HTN | ENSG00000267981 | 11 | 32   | 4   | 5E+05 | 0.01652  | AP003041.2  | 0.34801504        | 1 |
| COPD-HTN | ENSG00000101199 | 20 | 42   | 4   | 5E+05 | 0.016441 | ARFGAP1     | 0.346747085812357 | 1 |
| COPD-HTN | ENSG00000177311 | 3  | 225  | 25  | 5E+05 | 0.016414 | ZBTB38      | 0.34657418327606  | 1 |
| COPD-HTN | ENSG00000163217 | 2  | 11   | 3   | 5E+05 | 0.016377 | BMP10       | 0.346189496559633 | 1 |
| COPD-HTN | ENSG00000242265 | 7  | 12   | 4   | 5E+05 | 0.016374 | PEG10       | 0.346189496559633 | 1 |

|          |                 |    |      |     |       |          |             |                   |   |
|----------|-----------------|----|------|-----|-------|----------|-------------|-------------------|---|
| COPD-HTN | ENSG0000011114  | 14 | 250  | 18  | 5E+05 | 0.016326 | BTBD7       | 0.345904779310345 | 1 |
| COPD-HTN | ENSG0000100003  | 22 | 67   | 12  | 5E+05 | 0.016309 | SEC14L2     | 0.345904779310345 | 1 |
| COPD-HTN | ENSG00000115325 | 2  | 7    | 2   | 5E+05 | 0.016287 | DOK1        | 0.345873584101382 | 1 |
| COPD-HTN | ENSG00000224470 | 16 | 63   | 10  | 5E+05 | 0.016286 | ATXNL       | 0.345873584101382 | 1 |
| COPD-HTN | ENSG00000091164 | 18 | 83   | 7   | 5E+05 | 0.016256 | TXNL1       | 0.345873584101382 | 1 |
| COPD-HTN | ENSG00000214113 | 6  | 484  | 35  | 5E+05 | 0.016235 | LYRM4       | 0.345873584101382 | 1 |
| COPD-HTN | ENSG00000077809 | 7  | 50   | 16  | 5E+05 | 0.016226 | GTF2I       | 0.345873584101382 | 1 |
| COPD-HTN | ENSG00000130208 | 19 | 8    | 4   | 5E+05 | 0.016211 | APOC1       | 0.345873584101382 | 1 |
| COPD-HTN | ENSG00000151176 | 12 | 53   | 6   | 5E+05 | 0.016111 | PLBD2       | 0.344517474477958 | 1 |
| COPD-HTN | ENSG00000205856 | 22 | 31   | 7   | 5E+05 | 0.016091 | C22orf42    | 0.34448943437863  | 1 |
| COPD-HTN | ENSG00000164219 | 5  | 106  | 16  | 5E+05 | 0.01605  | PGGT1B      | 0.344011220930233 | 1 |
| COPD-HTN | ENSG00000089280 | 16 | 7    | 3   | 5E+05 | 0.016021 | FUS         | 0.343789398137369 | 1 |
| COPD-HTN | ENSG00000183023 | 2  | 1686 | 100 | 5E+05 | 0.016006 | SLC8A1      | 0.343789398137369 | 1 |
| COPD-HTN | ENSG00000160844 | 7  | 115  | 13  | 5E+05 | 0.016002 | GATS        | 0.343789398137369 | 1 |
| COPD-HTN | ENSG00000068078 | 4  | 32   | 7   | 5E+05 | 0.015999 | FGFR3       | 0.343789398137369 | 1 |
| COPD-HTN | ENSG00000176046 | 16 | 4    | 2   | 5E+05 | 0.015999 | NUPR1       | 0.343789398137369 | 1 |
| COPD-HTN | ENSG00000138381 | 2  | 20   | 5   | 5E+05 | 0.015993 | ASNSD1      | 0.343789398137369 | 1 |
| COPD-HTN | ENSG00000203876 | 10 | 21   | 3   | 5E+05 | 0.015964 | RP11-451M15 | 0.343789398137369 | 1 |
| COPD-HTN | ENSG00000169885 | 1  | 11   | 3   | 5E+05 | 0.015949 | CALML6      | 0.343789398137369 | 1 |
| COPD-HTN | ENSG00000102921 | 16 | 142  | 7   | 5E+05 | 0.015949 | N4BP1       | 0.343789398137369 | 1 |
| COPD-HTN | ENSG00000136859 | 9  | 52   | 10  | 5E+05 | 0.015943 | ANGPTL2     | 0.343789398137369 | 1 |
| COPD-HTN | ENSG00000070193 | 5  | 129  | 8   | 5E+05 | 0.015917 | FGF10       | 0.343789398137369 | 1 |
| COPD-HTN | ENSG00000186472 | 7  | 963  | 39  | 5E+05 | 0.015868 | PCLO        | 0.343789398137369 | 1 |
| COPD-HTN | ENSG00000169228 | 5  | 5    | 3   | 5E+05 | 0.015794 | RAB24       | 0.343719955135773 | 1 |
| COPD-HTN | ENSG00000215021 | 12 | 7    | 3   | 5E+05 | 0.015766 | PHB2        | 0.3435161678487   | 1 |
| COPD-HTN | ENSG00000198933 | 17 | 33   | 8   | 5E+05 | 0.015719 | TBKBP1      | 0.342897428402367 | 1 |
| COPD-HTN | ENSG00000146477 | 6  | 209  | 16  | 5E+05 | 0.01571  | SLC22A3     | 0.342897428402367 | 1 |
| COPD-HTN | ENSG00000140995 | 16 | 76   | 11  | 5E+05 | 0.015688 | DEF8        | 0.342897428402367 | 1 |
| COPD-HTN | ENSG00000198894 | 14 | 34   | 7   | 5E+05 | 0.015657 | CIPC        | 0.34276185391924  | 1 |
| COPD-HTN | ENSG00000168827 | 3  | 162  | 8   | 5E+05 | 0.015642 | GFM1        | 0.34276185391924  | 1 |
| COPD-HTN | ENSG00000087884 | 11 | 143  | 12  | 5E+05 | 0.01556  | AAMDC       | 0.341449380952381 | 1 |
| COPD-HTN | ENSG00000124104 | 20 | 22   | 6   | 5E+05 | 0.01555  | SNX21       | 0.341449380952381 | 1 |
| COPD-HTN | ENSG00000165046 | 8  | 27   | 4   | 5E+05 | 0.015518 | LETM2       | 0.341340446300716 | 1 |

|          |                 |    |      |    |       |          |              |                   |   |
|----------|-----------------|----|------|----|-------|----------|--------------|-------------------|---|
| COPD-HTN | ENSG00000137221 | 6  | 29   | 6  | 5E+05 | 0.015499 | TJAP1        | 0.341329829151732 | 1 |
| COPD-HTN | ENSG00000271810 | 1  | 19   | 6  | 5E+05 | 0.015462 | RP11-426L16  | 0.340922303827751 | 1 |
| COPD-HTN | ENSG00000066933 | 15 | 344  | 13 | 5E+05 | 0.015435 | MYO9A        | 0.340734556886228 | 1 |
| COPD-HTN | ENSG00000100462 | 14 | 14   | 3  | 5E+05 | 0.015427 | PRMT5        | 0.340734556886228 | 1 |
| COPD-HTN | ENSG00000101400 | 20 | 45   | 6  | 5E+05 | 0.015409 | SNTA1        | 0.340734556886228 | 1 |
| COPD-HTN | ENSG00000110693 | 11 | 1196 | 50 | 5E+05 | 0.015362 | SOX6         | 0.340345848557692 | 1 |
| COPD-HTN | ENSG00000183798 | 20 | 20   | 5  | 5E+05 | 0.015348 | EMILIN3      | 0.340345848557692 | 1 |
| COPD-HTN | ENSG00000174963 | 3  | 29   | 8  | 5E+05 | 0.015347 | ZIC4         | 0.340345848557692 | 1 |
| COPD-HTN | ENSG00000100167 | 22 | 48   | 8  | 5E+05 | 0.015337 | SEPT3        | 0.340345848557692 | 1 |
| COPD-HTN | ENSG00000103310 | 16 | 39   | 9  | 5E+05 | 0.015293 | ZP2          | 0.340345848557692 | 1 |
| COPD-HTN | ENSG00000100296 | 22 | 104  | 10 | 5E+05 | 0.015259 | THOC5        | 0.340107795646917 | 1 |
| COPD-HTN | ENSG00000067533 | 1  | 81   | 5  | 5E+05 | 0.015216 | RRP15        | 0.33955996125908  | 1 |
| COPD-HTN | ENSG00000129158 | 11 | 402  | 38 | 5E+05 | 0.015188 | SERGEF       | 0.339345944242424 | 1 |
| COPD-HTN | ENSG00000214556 | 17 | 20   | 6  | 5E+05 | 0.015095 | C17orf98     | 0.337677348300971 | 1 |
| COPD-HTN | ENSG00000065526 | 1  | 129  | 15 | 5E+05 | 0.015029 | SPEN         | 0.33660942527339  | 1 |
| COPD-HTN | ENSG00000108443 | 17 | 83   | 11 | 5E+05 | 0.015025 | RPS6KB1      | 0.33660942527339  | 1 |
| COPD-HTN | ENSG00000145777 | 5  | 14   | 4  | 5E+05 | 0.014962 | TSLP         | 0.335925147381242 | 1 |
| COPD-HTN | ENSG00000251283 | 4  | 21   | 6  | 5E+05 | 0.014961 | RP11-171N4.1 | 0.335925147381242 | 1 |
| COPD-HTN | ENSG00000116668 | 1  | 132  | 11 | 5E+05 | 0.014929 | SWT1         | 0.335925147381242 | 1 |
| COPD-HTN | ENSG00000204140 | 6  | 31   | 6  | 5E+05 | 0.014916 | CLPSL1       | 0.335925147381242 | 1 |
| COPD-HTN | ENSG00000168589 | 16 | 41   | 5  | 5E+05 | 0.014895 | DYNLRB2      | 0.335925147381242 | 1 |
| COPD-HTN | ENSG00000242612 | 16 | 18   | 4  | 5E+05 | 0.014885 | DECR2        | 0.335925147381242 | 1 |
| COPD-HTN | ENSG00000131351 | 19 | 82   | 11 | 5E+05 | 0.01488  | HAUS8        | 0.335925147381242 | 1 |
| COPD-HTN | ENSG00000148399 | 9  | 23   | 5  | 5E+05 | 0.014865 | DPH7         | 0.335925147381242 | 1 |
| COPD-HTN | ENSG00000104047 | 15 | 30   | 7  | 5E+05 | 0.014848 | DTWD1        | 0.335925147381242 | 1 |
| COPD-HTN | ENSG00000141744 | 17 | 3    | 2  | 5E+05 | 0.014816 | PNMT         | 0.335925147381242 | 1 |
| COPD-HTN | ENSG00000162630 | 1  | 9    | 3  | 5E+05 | 0.014805 | B3GALT2      | 0.335925147381242 | 1 |
| COPD-HTN | ENSG00000168612 | 20 | 6    | 2  | 5E+05 | 0.014773 | ZSWIM1       | 0.335925147381242 | 1 |
| COPD-HTN | ENSG00000072756 | 3  | 75   | 10 | 5E+05 | 0.014771 | TRNT1        | 0.335925147381242 | 1 |
| COPD-HTN | ENSG00000163877 | 1  | 40   | 8  | 5E+05 | 0.014748 | SNIP1        | 0.335925147381242 | 1 |
| COPD-HTN | ENSG00000196323 | 11 | 91   | 11 | 5E+05 | 0.014741 | ZBTB44       | 0.335925147381242 | 1 |
| COPD-HTN | ENSG00000197386 | 4  | 326  | 19 | 5E+05 | 0.014729 | HTT          | 0.335925147381242 | 1 |
| COPD-HTN | ENSG00000152977 | 3  | 241  | 22 | 5E+05 | 0.014651 | ZIC1         | 0.3354806         | 1 |

|          |                 |    |     |    |       |          |           |                   |   |
|----------|-----------------|----|-----|----|-------|----------|-----------|-------------------|---|
| COPD-HTN | ENSG00000134917 | 11 | 69  | 17 | 5E+05 | 0.014597 | ADAMTS8   | 0.334659827114428 | 1 |
| COPD-HTN | ENSG00000149926 | 16 | 41  | 6  | 5E+05 | 0.014589 | FAM57B    | 0.334659827114428 | 1 |
| COPD-HTN | ENSG00000167528 | 12 | 36  | 7  | 5E+05 | 0.014559 | ZNF641    | 0.334621006234414 | 1 |
| COPD-HTN | ENSG00000243789 | 15 | 35  | 6  | 5E+05 | 0.014551 | JMJD7     | 0.334621006234414 | 1 |
| COPD-HTN | ENSG00000163681 | 3  | 219 | 19 | 5E+05 | 0.014539 | SLMAP     | 0.334621006234414 | 1 |
| COPD-HTN | ENSG00000063015 | 17 | 56  | 9  | 5E+05 | 0.014531 | SEZ6      | 0.334621006234414 | 1 |
| COPD-HTN | ENSG00000132394 | 3  | 448 | 16 | 5E+05 | 0.01453  | EEFSEC    | 0.334621006234414 | 1 |
| COPD-HTN | ENSG00000005249 | 7  | 235 | 22 | 5E+05 | 0.014503 | PRKAR2B   | 0.334621006234414 | 1 |
| COPD-HTN | ENSG00000132185 | 1  | 29  | 6  | 5E+05 | 0.014411 | FCRLA     | 0.333716033919598 | 1 |
| COPD-HTN | ENSG00000159723 | 16 | 3   | 1  | 5E+05 | 0.014366 | AGRP      | 0.333092425157233 | 1 |
| COPD-HTN | ENSG00000089234 | 12 | 29  | 5  | 5E+05 | 0.014315 | BRAP      | 0.332327953400504 | 1 |
| COPD-HTN | ENSG00000138061 | 2  | 132 | 18 | 5E+05 | 0.014202 | CYP1B1    | 0.330120385876419 | 1 |
| COPD-HTN | ENSG00000115970 | 2  | 967 | 36 | 5E+05 | 0.014201 | THADA     | 0.330120385876419 | 1 |
| COPD-HTN | ENSG00000124257 | 20 | 3   | 1  | 5E+05 | 0.014185 | NEURL2    | 0.330120385876419 | 1 |
| COPD-HTN | ENSG00000147548 | 8  | 122 | 9  | 5E+05 | 0.014178 | WHSC1L1   | 0.330120385876419 | 1 |
| COPD-HTN | ENSG00000143793 | 1  | 5   | 3  | 5E+05 | 0.014125 | C1orf35   | 0.329995088719899 | 1 |
| COPD-HTN | ENSG00000178226 | 16 | 8   | 3  | 5E+05 | 0.01411  | PRSS36    | 0.329995088719899 | 1 |
| COPD-HTN | ENSG00000183346 | 10 | 340 | 21 | 5E+05 | 0.014107 | C10orf107 | 0.329995088719899 | 1 |
| COPD-HTN | ENSG00000108344 | 17 | 56  | 6  | 5E+05 | 0.014093 | PSMD3     | 0.329995088719899 | 1 |
| COPD-HTN | ENSG00000165816 | 10 | 124 | 19 | 5E+05 | 0.013991 | VWA2      | 0.328530067515924 | 1 |
| COPD-HTN | ENSG00000182319 | 8  | 252 | 25 | 5E+05 | 0.013926 | SGK223    | 0.327420864795918 | 1 |
| COPD-HTN | ENSG00000143801 | 1  | 72  | 8  | 5E+05 | 0.013924 | PSEN2     | 0.327420864795918 | 1 |
| COPD-HTN | ENSG00000108278 | 17 | 18  | 5  | 5E+05 | 0.013908 | ZNHIT3    | 0.327420864795918 | 1 |
| COPD-HTN | ENSG00000173457 | 11 | 4   | 1  | 5E+05 | 0.013901 | PPP1R14B  | 0.327420864795918 | 1 |
| COPD-HTN | ENSG00000062716 | 17 | 188 | 17 | 5E+05 | 0.013895 | VMP1      | 0.327420864795918 | 1 |
| COPD-HTN | ENSG00000101473 | 20 | 35  | 10 | 5E+05 | 0.013875 | ACOT8     | 0.327420864795918 | 1 |
| COPD-HTN | ENSG00000163071 | 4  | 83  | 9  | 5E+05 | 0.013873 | SPATA18   | 0.327420864795918 | 1 |
| COPD-HTN | ENSG00000082898 | 2  | 93  | 9  | 5E+05 | 0.013863 | XPO1      | 0.327420864795918 | 1 |
| COPD-HTN | ENSG00000204842 | 12 | 101 | 7  | 5E+05 | 0.013828 | ATXN2     | 0.327420864795918 | 1 |
| COPD-HTN | ENSG00000163947 | 3  | 984 | 86 | 5E+05 | 0.013797 | ARHGEF3   | 0.327420864795918 | 1 |
| COPD-HTN | ENSG00000130270 | 19 | 81  | 18 | 5E+05 | 0.013788 | ATP8B3    | 0.327420864795918 | 1 |
| COPD-HTN | ENSG00000159714 | 16 | 32  | 6  | 5E+05 | 0.013757 | ZDHHC1    | 0.327420864795918 | 1 |
| COPD-HTN | ENSG00000169599 | 2  | 88  | 6  | 5E+05 | 0.013751 | NFU1      | 0.327420864795918 | 1 |

|          |                 |    |     |    |       |          |             |                   |   |
|----------|-----------------|----|-----|----|-------|----------|-------------|-------------------|---|
| COPD-HTN | ENSG00000164087 | 3  | 85  | 10 | 5E+05 | 0.01366  | POC1A       | 0.326582075226978 | 1 |
| COPD-HTN | ENSG00000170923 | 19 | 4   | 1  | 5E+05 | 0.013644 | OR7G2       | 0.326582075226978 | 1 |
| COPD-HTN | ENSG00000271786 | 10 | 34  | 5  | 5E+05 | 0.013626 | RP11-139J15 | 0.326582075226978 | 1 |
| COPD-HTN | ENSG00000236980 | 3  | 19  | 4  | 5E+05 | 0.013546 | C3orf84     | 0.325121638020833 | 1 |
| COPD-HTN | ENSG00000120899 | 8  | 352 | 18 | 5E+05 | 0.013527 | PTK2B       | 0.325088906127771 | 1 |
| COPD-HTN | ENSG00000165724 | 9  | 12  | 2  | 5E+05 | 0.013514 | ZMYND19     | 0.325088906127771 | 1 |
| COPD-HTN | ENSG00000170571 | 5  | 74  | 7  | 5E+05 | 0.013481 | EMB         | 0.324830422222222 | 1 |
| COPD-HTN | ENSG00000100207 | 22 | 350 | 30 | 5E+05 | 0.013466 | TCF20       | 0.324830422222222 | 1 |
| COPD-HTN | ENSG00000079257 | 3  | 88  | 7  | 5E+05 | 0.013412 | LXN         | 0.324014935779817 | 1 |
| COPD-HTN | ENSG00000243708 | 15 | 68  | 9  | 5E+05 | 0.013408 | PLA2G4B     | 0.324014935779817 | 1 |
| COPD-HTN | ENSG00000168970 | 15 | 68  | 9  | 5E+05 | 0.013408 | JMJD7-PLA2  | 0.324014935779817 | 1 |
| COPD-HTN | ENSG00000134533 | 12 | 422 | 28 | 5E+05 | 0.013406 | RERG        | 0.324014935779817 | 1 |
| COPD-HTN | ENSG00000240583 | 7  | 187 | 34 | 5E+05 | 0.013391 | AQP1        | 0.324014935779817 | 1 |
| COPD-HTN | ENSG00000116983 | 1  | 67  | 12 | 5E+05 | 0.013365 | HPCAL4      | 0.324014935779817 | 1 |
| COPD-HTN | ENSG00000160716 | 1  | 17  | 6  | 5E+05 | 0.013361 | CHRNA2      | 0.324014935779817 | 1 |
| COPD-HTN | ENSG00000164746 | 7  | 71  | 8  | 5E+05 | 0.01335  | C7orf57     | 0.324014935779817 | 1 |
| COPD-HTN | ENSG00000168758 | 2  | 6   | 3  | 5E+05 | 0.013334 | SEMA4C      | 0.324014935779817 | 1 |
| COPD-HTN | ENSG00000099999 | 22 | 113 | 17 | 5E+05 | 0.013321 | RNF215      | 0.324014935779817 | 1 |
| COPD-HTN | ENSG00000179941 | 12 | 4   | 2  | 5E+05 | 0.01332  | BBS10       | 0.324014935779817 | 1 |
| COPD-HTN | ENSG00000142694 | 1  | 3   | 1  | 5E+05 | 0.013312 | EVA1B       | 0.324014935779817 | 1 |
| COPD-HTN | ENSG00000118900 | 16 | 124 | 16 | 5E+05 | 0.013307 | UBN1        | 0.324014935779817 | 1 |
| COPD-HTN | ENSG00000250424 | 7  | 182 | 33 | 5E+05 | 0.013268 | AQP1        | 0.324014935779817 | 1 |
| COPD-HTN | ENSG00000174840 | 3  | 19  | 5  | 5E+05 | 0.013241 | PDE12       | 0.324014935779817 | 1 |
| COPD-HTN | ENSG00000254647 | 11 | 6   | 2  | 5E+05 | 0.013218 | INS         | 0.324014935779817 | 1 |
| COPD-HTN | ENSG00000174233 | 12 | 38  | 4  | 5E+05 | 0.013214 | ADCY6       | 0.324014935779817 | 1 |
| COPD-HTN | ENSG00000127152 | 14 | 249 | 40 | 5E+05 | 0.013149 | BCL11B      | 0.324014935779817 | 1 |
| COPD-HTN | ENSG00000184574 | 12 | 27  | 9  | 5E+05 | 0.013114 | LPAR5       | 0.324014935779817 | 1 |
| COPD-HTN | ENSG00000116497 | 1  | 54  | 8  | 5E+05 | 0.01309  | S100PBP     | 0.324014935779817 | 1 |
| COPD-HTN | ENSG00000138778 | 4  | 152 | 10 | 5E+05 | 0.013058 | CENPE       | 0.323954393001346 | 1 |
| COPD-HTN | ENSG00000128989 | 15 | 62  | 7  | 5E+05 | 0.01303  | ARPP19      | 0.323695404312669 | 1 |
| COPD-HTN | ENSG00000268217 | 5  | 11  | 4  | 5E+05 | 0.012945 | AC008387.1  | 0.322017793522267 | 1 |
| COPD-HTN | ENSG00000174844 | 3  | 617 | 22 | 5E+05 | 0.01293  | DNAH12      | 0.322017793522267 | 1 |
| COPD-HTN | ENSG00000198218 | 3  | 46  | 8  | 5E+05 | 0.012911 | QRICH1      | 0.322017793522267 | 1 |

|          |                 |    |     |    |       |          |          |                   |   |
|----------|-----------------|----|-----|----|-------|----------|----------|-------------------|---|
| COPD-HTN | ENSG0000081177  | 14 | 90  | 9  | 5E+05 | 0.012905 | EXD2     | 0.322017793522267 | 1 |
| COPD-HTN | ENSG0000073060  | 12 | 312 | 48 | 5E+05 | 0.012884 | SCARB1   | 0.322017793522267 | 1 |
| COPD-HTN | ENSG0000070366  | 17 | 524 | 20 | 5E+05 | 0.012863 | SMG6     | 0.322017793522267 | 1 |
| COPD-HTN | ENSG00000110011 | 11 | 7   | 3  | 5E+05 | 0.012761 | DNAJC4   | 0.320031990476191 | 1 |
| COPD-HTN | ENSG00000101074 | 20 | 52  | 4  | 5E+05 | 0.012735 | R3HDML   | 0.319815061307902 | 1 |
| COPD-HTN | ENSG00000107581 | 10 | 60  | 7  | 5E+05 | 0.01271  | EIF3A    | 0.319622687585266 | 1 |
| COPD-HTN | ENSG00000243130 | 19 | 62  | 6  | 5E+05 | 0.012572 | PSG11    | 0.316584256830601 | 1 |
| COPD-HTN | ENSG00000187513 | 1  | 10  | 3  | 5E+05 | 0.012537 | GJA4     | 0.316134775649795 | 1 |
| COPD-HTN | ENSG00000198650 | 16 | 21  | 7  | 5E+05 | 0.012524 | TAT      | 0.316134775649795 | 1 |
| COPD-HTN | ENSG00000179958 | 16 | 4   | 2  | 5E+05 | 0.012481 | DCTPP1   | 0.315586108367627 | 1 |
| COPD-HTN | ENSG00000070759 | 1  | 203 | 15 | 5E+05 | 0.012324 | TESK2    | 0.312044357142857 | 1 |
| COPD-HTN | ENSG00000135436 | 12 | 32  | 7  | 5E+05 | 0.012317 | FAM186B  | 0.312044357142857 | 1 |
| COPD-HTN | ENSG00000187266 | 19 | 4   | 2  | 5E+05 | 0.012312 | EPOR     | 0.312044357142857 | 1 |
| COPD-HTN | ENSG00000116793 | 1  | 92  | 10 | 5E+05 | 0.012291 | PHTF1    | 0.312044357142857 | 1 |
| COPD-HTN | ENSG00000107789 | 10 | 77  | 13 | 5E+05 | 0.012267 | MINPP1   | 0.312044357142857 | 1 |
| COPD-HTN | ENSG00000170209 | 11 | 38  | 6  | 5E+05 | 0.012235 | ANKK1    | 0.311933271092669 | 1 |
| COPD-HTN | ENSG00000228716 | 5  | 122 | 5  | 5E+05 | 0.012234 | DHFR     | 0.311933271092669 | 1 |
| COPD-HTN | ENSG00000128298 | 22 | 49  | 6  | 5E+05 | 0.012165 | BAIAP2L2 | 0.311008938973648 | 1 |
| COPD-HTN | ENSG00000213420 | 7  | 8   | 3  | 5E+05 | 0.012142 | GPC2     | 0.310852063888889 | 1 |
| COPD-HTN | ENSG00000074855 | 19 | 24  | 7  | 5E+05 | 0.0121   | ANO8     | 0.310207649513213 | 1 |
| COPD-HTN | ENSG00000182177 | 2  | 266 | 14 | 5E+05 | 0.012045 | ASB18    | 0.309227694986072 | 1 |
| COPD-HTN | ENSG00000197093 | 7  | 11  | 3  | 5E+05 | 0.011973 | GAL3ST4  | 0.307807962343096 | 1 |
| COPD-HTN | ENSG00000186314 | 5  | 820 | 30 | 5E+05 | 0.011899 | PRELID2  | 0.306332775139665 | 1 |
| COPD-HTN | ENSG00000162522 | 1  | 51  | 13 | 5E+05 | 0.011847 | KIAA1522 | 0.305420630769231 | 1 |
| COPD-HTN | ENSG00000167202 | 15 | 209 | 21 | 5E+05 | 0.011794 | TBC1D2B  | 0.304480114845938 | 1 |
| COPD-HTN | ENSG00000130598 | 11 | 6   | 3  | 5E+05 | 0.01176  | TNNI2    | 0.304028162692847 | 1 |
| COPD-HTN | ENSG00000140983 | 16 | 20  | 4  | 5E+05 | 0.011669 | RHOT2    | 0.302099265449438 | 1 |
| COPD-HTN | ENSG00000145283 | 4  | 26  | 7  | 5E+05 | 0.011661 | SLC10A6  | 0.302099265449438 | 1 |
| COPD-HTN | ENSG00000176390 | 17 | 158 | 4  | 5E+05 | 0.011655 | CRLF3    | 0.302099265449438 | 1 |
| COPD-HTN | ENSG00000115233 | 2  | 139 | 14 | 5E+05 | 0.011651 | PSMD14   | 0.302099265449438 | 1 |
| COPD-HTN | ENSG00000167914 | 17 | 44  | 7  | 5E+05 | 0.011629 | GSDMA    | 0.302099265449438 | 1 |
| COPD-HTN | ENSG00000119760 | 2  | 8   | 3  | 5E+05 | 0.011628 | SUPT7L   | 0.302099265449438 | 1 |
| COPD-HTN | ENSG00000172426 | 6  | 73  | 8  | 5E+05 | 0.011619 | RSPH9    | 0.302099265449438 | 1 |

|          |                 |    |     |    |       |          |          |                   |   |
|----------|-----------------|----|-----|----|-------|----------|----------|-------------------|---|
| COPD-HTN | ENSG00000148814 | 10 | 181 | 17 | 5E+05 | 0.011539 | LRRC27   | 0.301699839716312 | 1 |
| COPD-HTN | ENSG00000166747 | 16 | 160 | 15 | 5E+05 | 0.011501 | APIG1    | 0.301133427556818 | 1 |
| COPD-HTN | ENSG00000135842 | 1  | 340 | 22 | 5E+05 | 0.011477 | FAM129A  | 0.300932490753912 | 1 |
| COPD-HTN | ENSG00000161992 | 16 | 17  | 7  | 5E+05 | 0.011475 | C16orf11 | 0.300932490753912 | 1 |
| COPD-HTN | ENSG00000103275 | 16 | 111 | 9  | 5E+05 | 0.011466 | UBE2I    | 0.300932490753912 | 1 |
| COPD-HTN | ENSG00000118046 | 19 | 96  | 19 | 5E+05 | 0.01145  | STK11    | 0.300932490753912 | 1 |
| COPD-HTN | ENSG00000179832 | 8  | 86  | 11 | 5E+05 | 0.011441 | MROH1    | 0.300932490753912 | 1 |
| COPD-HTN | ENSG00000162419 | 1  | 58  | 5  | 5E+05 | 0.011421 | GMEB1    | 0.300932490753912 | 1 |
| COPD-HTN | ENSG00000182149 | 16 | 150 | 14 | 5E+05 | 0.011418 | IST1     | 0.300932490753912 | 1 |
| COPD-HTN | ENSG00000153827 | 2  | 169 | 18 | 5E+05 | 0.011413 | TRIP12   | 0.300932490753912 | 1 |
| COPD-HTN | ENSG00000176020 | 3  | 3   | 2  | 5E+05 | 0.011402 | AMIGO3   | 0.300932490753912 | 1 |
| COPD-HTN | ENSG00000173540 | 3  | 3   | 2  | 5E+05 | 0.011402 | GMPPB    | 0.300932490753912 | 1 |
| COPD-HTN | ENSG00000101049 | 20 | 73  | 17 | 5E+05 | 0.011384 | SGK2     | 0.300932490753912 | 1 |
| COPD-HTN | ENSG00000134684 | 1  | 65  | 9  | 5E+05 | 0.011376 | YARS     | 0.300932490753912 | 1 |
| COPD-HTN | ENSG00000108294 | 17 | 25  | 8  | 5E+05 | 0.011268 | PSMB3    | 0.300583276410999 | 1 |
| COPD-HTN | ENSG00000108424 | 17 | 38  | 7  | 5E+05 | 0.011258 | KPNB1    | 0.300583276410999 | 1 |
| COPD-HTN | ENSG00000236287 | 11 | 123 | 11 | 5E+05 | 0.011235 | ZBED5    | 0.30057293904209  | 1 |
| COPD-HTN | ENSG00000127081 | 9  | 65  | 9  | 5E+05 | 0.011156 | ZNF484   | 0.298893238372093 | 1 |
| COPD-HTN | ENSG00000060237 | 12 | 323 | 21 | 5E+05 | 0.011139 | WNK1     | 0.298872179039301 | 1 |
| COPD-HTN | ENSG00000163879 | 1  | 26  | 6  | 5E+05 | 0.011124 | DNALI1   | 0.298872179039301 | 1 |
| COPD-HTN | ENSG00000186451 | 3  | 39  | 8  | 5E+05 | 0.011112 | SPATA12  | 0.298872179039301 | 1 |
| COPD-HTN | ENSG00000079102 | 8  | 161 | 7  | 5E+05 | 0.011076 | RUNX1T1  | 0.298485245614035 | 1 |
| COPD-HTN | ENSG00000113645 | 5  | 549 | 68 | 5E+05 | 0.011066 | WWC1     | 0.298485245614035 | 1 |
| COPD-HTN | ENSG00000188186 | 7  | 8   | 2  | 5E+05 | 0.011022 | LAMTOR4  | 0.297901064516129 | 1 |
| COPD-HTN | ENSG00000164162 | 4  | 110 | 16 | 5E+05 | 0.010937 | ANAPC10  | 0.296037769456681 | 1 |
| COPD-HTN | ENSG00000137513 | 11 | 314 | 6  | 5E+05 | 0.010877 | NARS2    | 0.294846677941176 | 1 |
| COPD-HTN | ENSG00000066923 | 7  | 100 | 8  | 5E+05 | 0.010864 | STAG3    | 0.294846677941176 | 1 |
| COPD-HTN | ENSG00000183762 | 22 | 270 | 24 | 5E+05 | 0.010858 | KREMEN1  | 0.294846677941176 | 1 |
| COPD-HTN | ENSG00000164451 | 6  | 63  | 8  | 5E+05 | 0.010827 | FAM26D   | 0.294791862629247 | 1 |
| COPD-HTN | ENSG00000184349 | 5  | 687 | 85 | 5E+05 | 0.010802 | EFNA5    | 0.29454625147929  | 1 |
| COPD-HTN | ENSG00000130177 | 13 | 85  | 10 | 5E+05 | 0.010775 | CDC16    | 0.294245296296296 | 1 |
| COPD-HTN | ENSG00000146197 | 6  | 54  | 9  | 5E+05 | 0.010769 | SCUBE3   | 0.294245296296296 | 1 |
| COPD-HTN | ENSG00000134461 | 10 | 118 | 13 | 5E+05 | 0.010766 | ANKRD16  | 0.294245296296296 | 1 |

|          |                 |    |      |     |       |          |             |                   |   |
|----------|-----------------|----|------|-----|-------|----------|-------------|-------------------|---|
| COPD-HTN | ENSG00000178821 | 1  | 6    | 2   | 5E+05 | 0.010761 | TMEM52      | 0.294245296296296 | 1 |
| COPD-HTN | ENSG00000072364 | 5  | 167  | 11  | 5E+05 | 0.010745 | AFF4        | 0.294245296296296 | 1 |
| COPD-HTN | ENSG00000198055 | 5  | 63   | 16  | 5E+05 | 0.010601 | GRK6        | 0.291654079104478 | 1 |
| COPD-HTN | ENSG00000129255 | 17 | 12   | 5   | 5E+05 | 0.010598 | MPDU1       | 0.291654079104478 | 1 |
| COPD-HTN | ENSG00000129911 | 19 | 23   | 3   | 5E+05 | 0.010487 | KLF16       | 0.289381543413174 | 1 |
| COPD-HTN | ENSG00000198356 | 19 | 4    | 2   | 5E+05 | 0.010476 | ASNA1       | 0.289381543413174 | 1 |
| COPD-HTN | ENSG00000125450 | 17 | 43   | 6   | 5E+05 | 0.010468 | NUP85       | 0.289381543413174 | 1 |
| COPD-HTN | ENSG00000269693 | 19 | 82   | 14  | 5E+05 | 0.010459 | CTD-2192J16 | 0.289381543413174 | 1 |
| COPD-HTN | ENSG00000174791 | 11 | 18   | 5   | 5E+05 | 0.010458 | RIN1        | 0.289381543413174 | 1 |
| COPD-HTN | ENSG00000065413 | 2  | 829  | 53  | 5E+05 | 0.01038  | ANKRD44     | 0.288589049773756 | 1 |
| COPD-HTN | ENSG00000099814 | 14 | 102  | 11  | 5E+05 | 0.010372 | CEP170B     | 0.288589049773756 | 1 |
| COPD-HTN | ENSG00000054392 | 1  | 1221 | 95  | 5E+05 | 0.010362 | HHAT        | 0.288589049773756 | 1 |
| COPD-HTN | ENSG00000062524 | 15 | 26   | 7   | 5E+05 | 0.010321 | LTK         | 0.28825301969697  | 1 |
| COPD-HTN | ENSG00000115841 | 2  | 403  | 22  | 5E+05 | 0.010269 | RMDN2       | 0.287235928679818 | 1 |
| COPD-HTN | ENSG00000078142 | 18 | 174  | 13  | 5E+05 | 0.010249 | PIK3C3      | 0.287112183890578 | 1 |
| COPD-HTN | ENSG00000147676 | 8  | 240  | 28  | 5E+05 | 0.010223 | MAL2        | 0.286819724505327 | 1 |
| COPD-HTN | ENSG00000111897 | 6  | 64   | 10  | 5E+05 | 0.010177 | SERINC1     | 0.285964391768293 | 1 |
| COPD-HTN | ENSG00000065029 | 6  | 74   | 9   | 5E+05 | 0.010167 | ZNF76       | 0.285964391768293 | 1 |
| COPD-HTN | ENSG00000101391 | 20 | 37   | 7   | 5E+05 | 0.010155 | CDK5RAP1    | 0.285964391768293 | 1 |
| COPD-HTN | ENSG00000128573 | 7  | 797  | 42  | 5E+05 | 0.010072 | FOXP2       | 0.284314205206738 | 1 |
| COPD-HTN | ENSG00000125445 | 17 | 8    | 1   | 5E+05 | 0.010072 | MRPS7       | 0.284314205206738 | 1 |
| COPD-HTN | ENSG00000187801 | 1  | 45   | 14  | 5E+05 | 0.010048 | ZFP69B      | 0.284314205206738 | 1 |
| COPD-HTN | ENSG00000140382 | 15 | 107  | 10  | 5E+05 | 0.009985 | HMG20A      | 0.283164910153846 | 1 |
| COPD-HTN | ENSG00000110844 | 12 | 90   | 10  | 5E+05 | 0.009954 | PRPF40B     | 0.28271223220339  | 1 |
| COPD-HTN | ENSG00000182901 | 1  | 1732 | 145 | 5E+05 | 0.009923 | RGS7        | 0.282272380092593 | 1 |
| COPD-HTN | ENSG00000225968 | 7  | 121  | 15  | 5E+05 | 0.009914 | ELFN1       | 0.282272380092593 | 1 |
| COPD-HTN | ENSG00000156735 | 8  | 47   | 3   | 5E+05 | 0.009885 | BAG4        | 0.2820562874613   | 1 |
| COPD-HTN | ENSG00000025156 | 6  | 62   | 7   | 5E+05 | 0.009842 | HSF2        | 0.281273290852713 | 1 |
| COPD-HTN | ENSG00000085276 | 3  | 1500 | 106 | 5E+05 | 0.009741 | MECOM       | 0.278819160869565 | 1 |
| COPD-HTN | ENSG00000182986 | 19 | 125  | 15  | 5E+05 | 0.009661 | ZNF320      | 0.276939341368585 | 1 |
| COPD-HTN | ENSG00000164402 | 5  | 78   | 7   | 5E+05 | 0.00966  | SEPT8       | 0.276939341368585 | 1 |
| COPD-HTN | ENSG00000153208 | 2  | 414  | 16  | 5E+05 | 0.009653 | MERTK       | 0.276939341368585 | 1 |
| COPD-HTN | ENSG00000155100 | 8  | 23   | 4   | 5E+05 | 0.009621 | OTUD6B      | 0.276939341368585 | 1 |

|          |                 |    |     |    |       |          |          |                   |   |
|----------|-----------------|----|-----|----|-------|----------|----------|-------------------|---|
| COPD-HTN | ENSG0000072135  | 2  | 21  | 3  | 5E+05 | 0.009599 | PTPN18   | 0.276910391549296 | 1 |
| COPD-HTN | ENSG00000184863 | 7  | 347 | 11 | 5E+05 | 0.009581 | RBM33    | 0.276809921159875 | 1 |
| COPD-HTN | ENSG00000155366 | 1  | 14  | 4  | 5E+05 | 0.009559 | RHOC     | 0.276610748822606 | 1 |
| COPD-HTN | ENSG00000166949 | 15 | 357 | 46 | 5E+05 | 0.009546 | SMAD3    | 0.276610748822606 | 1 |
| COPD-HTN | ENSG00000068697 | 2  | 41  | 7  | 5E+05 | 0.009506 | LAPTM4A  | 0.27593185007874  | 1 |
| COPD-HTN | ENSG00000167619 | 19 | 6   | 1  | 5E+05 | 0.009502 | TMEM145  | 0.27593185007874  | 1 |
| COPD-HTN | ENSG00000160321 | 19 | 257 | 11 | 5E+05 | 0.0095   | ZNF208   | 0.27593185007874  | 1 |
| COPD-HTN | ENSG00000149927 | 16 | 27  | 4  | 5E+05 | 0.009475 | DOC2A    | 0.27593185007874  | 1 |
| COPD-HTN | ENSG00000172922 | 11 | 14  | 4  | 5E+05 | 0.009406 | RNASEH2C | 0.274762706973059 | 1 |
| COPD-HTN | ENSG00000254685 | 1  | 90  | 7  | 5E+05 | 0.009381 | FPGT     | 0.274461518253968 | 1 |
| COPD-HTN | ENSG00000102984 | 16 | 58  | 8  | 5E+05 | 0.009327 | ZNF821   | 0.273321241812401 | 1 |
| COPD-HTN | ENSG00000175745 | 5  | 6   | 2  | 5E+05 | 0.009223 | NR2F1    | 0.270712673566879 | 1 |
| COPD-HTN | ENSG00000175202 | 15 | 16  | 5  | 5E+05 | 0.009163 | HIGD2B   | 0.269389328389155 | 1 |
| COPD-HTN | ENSG00000101150 | 20 | 62  | 10 | 5E+05 | 0.009155 | TPD52L2  | 0.269389328389155 | 1 |
| COPD-HTN | ENSG00000133639 | 12 | 9   | 4  | 5E+05 | 0.009112 | BTG1     | 0.268741343       | 1 |
| COPD-HTN | ENSG00000131771 | 17 | 18  | 4  | 5E+05 | 0.009067 | PPP1R1B  | 0.267827945192308 | 1 |
| COPD-HTN | ENSG00000166183 | 14 | 72  | 12 | 5E+05 | 0.009059 | ASPG     | 0.267827945192308 | 1 |
| COPD-HTN | ENSG00000085788 | 8  | 43  | 5  | 5E+05 | 0.008991 | DDHD2    | 0.266457609163987 | 1 |
| COPD-HTN | ENSG00000160208 | 21 | 43  | 4  | 5E+05 | 0.008986 | RRP1B    | 0.266457609163987 | 1 |
| COPD-HTN | ENSG00000145879 | 5  | 10  | 2  | 5E+05 | 0.008968 | SPINK7   | 0.266457609163987 | 1 |
| COPD-HTN | ENSG00000171680 | 1  | 126 | 21 | 5E+05 | 0.008956 | PLEKHG5  | 0.266457609163987 | 1 |
| COPD-HTN | ENSG00000179029 | 17 | 13  | 3  | 5E+05 | 0.008954 | TMEM107  | 0.266457609163987 | 1 |
| COPD-HTN | ENSG00000131437 | 5  | 76  | 5  | 5E+05 | 0.008904 | KIF3A    | 0.26600581636953  | 1 |
| COPD-HTN | ENSG00000188033 | 19 | 94  | 5  | 5E+05 | 0.008887 | ZNF490   | 0.265931933441558 | 1 |
| COPD-HTN | ENSG00000108826 | 17 | 9   | 2  | 5E+05 | 0.00886  | MRPL27   | 0.265543100487805 | 1 |
| COPD-HTN | ENSG00000156218 | 15 | 912 | 37 | 5E+05 | 0.008845 | ADAMTSL3 | 0.265537271986971 | 1 |
| COPD-HTN | ENSG00000175229 | 11 | 13  | 3  | 5E+05 | 0.008837 | GAL3ST3  | 0.265537271986971 | 1 |
| COPD-HTN | ENSG00000040199 | 16 | 168 | 16 | 5E+05 | 0.008819 | PHLPP2   | 0.265537271986971 | 1 |
| COPD-HTN | ENSG00000170382 | 1  | 166 | 22 | 5E+05 | 0.008806 | LRRN2    | 0.265537271986971 | 1 |
| COPD-HTN | ENSG00000005339 | 16 | 96  | 29 | 5E+05 | 0.00876  | CREBBP   | 0.264694858196721 | 1 |
| COPD-HTN | ENSG00000166275 | 10 | 22  | 6  | 5E+05 | 0.008638 | C10orf32 | 0.26146408407225  | 1 |
| COPD-HTN | ENSG00000178202 | 11 | 35  | 6  | 5E+05 | 0.008619 | KDELC2   | 0.261296870230263 | 1 |
| COPD-HTN | ENSG00000188486 | 11 | 4   | 1  | 5E+05 | 0.008614 | H2AFX    | 0.261296870230263 | 1 |

|          |                 |    |      |    |       |          |            |                   |   |
|----------|-----------------|----|------|----|-------|----------|------------|-------------------|---|
| COPD-HTN | ENSG00000213246 | 17 | 20   | 5  | 5E+05 | 0.008607 | SUPT4H1    | 0.261296870230263 | 1 |
| COPD-HTN | ENSG00000107864 | 10 | 283  | 15 | 5E+05 | 0.008589 | CPEB3      | 0.261296870230263 | 1 |
| COPD-HTN | ENSG00000170236 | 15 | 141  | 14 | 5E+05 | 0.008506 | USP50      | 0.259584858774834 | 1 |
| COPD-HTN | ENSG00000139734 | 13 | 1043 | 28 | 5E+05 | 0.008445 | DIAPH3     | 0.258165933996683 | 1 |
| COPD-HTN | ENSG00000059691 | 4  | 191  | 9  | 5E+05 | 0.008442 | PET112     | 0.258165933996683 | 1 |
| COPD-HTN | ENSG00000010327 | 3  | 40   | 10 | 5E+05 | 0.008434 | STAB1      | 0.258165933996683 | 1 |
| COPD-HTN | ENSG00000153214 | 2  | 117  | 19 | 5E+05 | 0.008414 | TMEM87B    | 0.258165933996683 | 1 |
| COPD-HTN | ENSG00000121552 | 3  | 42   | 8  | 5E+05 | 0.008352 | CSTA       | 0.257018796828047 | 1 |
| COPD-HTN | ENSG00000261459 | 16 | 5    | 3  | 5E+05 | 0.008329 | ZNF747     | 0.256727302842809 | 1 |
| COPD-HTN | ENSG00000134697 | 1  | 60   | 10 | 5E+05 | 0.008326 | GNL2       | 0.256727302842809 | 1 |
| COPD-HTN | ENSG00000176387 | 16 | 9    | 4  | 5E+05 | 0.008278 | HSD11B2    | 0.256011483389262 | 1 |
| COPD-HTN | ENSG00000188266 | 15 | 46   | 3  | 5E+05 | 0.008252 | HYKK       | 0.25565176907563  | 1 |
| COPD-HTN | ENSG00000121057 | 17 | 107  | 21 | 5E+05 | 0.008217 | AKAP1      | 0.254977420538721 | 1 |
| COPD-HTN | ENSG00000106031 | 7  | 11   | 4  | 5E+05 | 0.008207 | HOXA13     | 0.254977420538721 | 1 |
| COPD-HTN | ENSG00000131507 | 5  | 157  | 12 | 5E+05 | 0.008191 | NDFIP1     | 0.254977420538721 | 1 |
| COPD-HTN | ENSG00000141279 | 17 | 93   | 10 | 5E+05 | 0.008156 | NPEPPS     | 0.254378518950931 | 1 |
| COPD-HTN | ENSG00000188993 | 4  | 24   | 7  | 5E+05 | 0.008114 | LRRC66     | 0.253506862033898 | 1 |
| COPD-HTN | ENSG00000268861 | 19 | 347  | 16 | 5E+05 | 0.008098 | CTD-2207O2 | 0.253430278438031 | 1 |
| COPD-HTN | ENSG00000177238 | 16 | 6    | 2  | 5E+05 | 0.008089 | TRIM72     | 0.253430278438031 | 1 |
| COPD-HTN | ENSG00000169957 | 16 | 3    | 2  | 5E+05 | 0.008039 | ZNF768     | 0.252425333049404 | 1 |
| COPD-HTN | ENSG00000221843 | 2  | 7    | 3  | 5E+05 | 0.007999 | C2orf16    | 0.25161988668942  | 1 |
| COPD-HTN | ENSG00000140750 | 16 | 147  | 11 | 5E+05 | 0.007976 | ARHGAP17   | 0.251318988034188 | 1 |
| COPD-HTN | ENSG00000139990 | 14 | 149  | 17 | 5E+05 | 0.007945 | DCAF5      | 0.250758239383562 | 1 |
| COPD-HTN | ENSG00000149557 | 11 | 97   | 13 | 5E+05 | 0.007906 | FEZ1       | 0.24996792109777  | 1 |
| COPD-HTN | ENSG00000127990 | 7  | 87   | 8  | 5E+05 | 0.007906 | SGCE       | 0.24996792109777  | 1 |
| COPD-HTN | ENSG00000095627 | 10 | 116  | 11 | 5E+05 | 0.007899 | TDRD1      | 0.24996792109777  | 1 |
| COPD-HTN | ENSG00000166997 | 7  | 7    | 3  | 5E+05 | 0.007874 | CNPY4      | 0.24996792109777  | 1 |
| COPD-HTN | ENSG00000168802 | 16 | 25   | 9  | 5E+05 | 0.007839 | CHTF8      | 0.249574542659758 | 1 |
| COPD-HTN | ENSG00000011304 | 19 | 50   | 10 | 5E+05 | 0.007835 | PTBP1      | 0.249574542659758 | 1 |
| COPD-HTN | ENSG00000219435 | 11 | 5    | 2  | 5E+05 | 0.007814 | TEX40      | 0.249574542659758 | 1 |
| COPD-HTN | ENSG00000169247 | 5  | 341  | 29 | 5E+05 | 0.007806 | SH3TC2     | 0.249574542659758 | 1 |
| COPD-HTN | ENSG00000160207 | 21 | 140  | 11 | 5E+05 | 0.007792 | HSF2BP     | 0.249574542659758 | 1 |
| COPD-HTN | ENSG00000066405 | 3  | 67   | 9  | 5E+05 | 0.00777  | CLDN18     | 0.249519878048781 | 1 |

|          |                 |    |      |    |       |          |             |                   |   |
|----------|-----------------|----|------|----|-------|----------|-------------|-------------------|---|
| COPD-HTN | ENSG00000204909 | 5  | 25   | 2  | 5E+05 | 0.007768 | SPINK9      | 0.249519878048781 | 1 |
| COPD-HTN | ENSG00000162004 | 16 | 11   | 3  | 5E+05 | 0.007754 | CCDC78      | 0.249519878048781 | 1 |
| COPD-HTN | ENSG00000144824 | 3  | 814  | 43 | 5E+05 | 0.007715 | PHLDB2      | 0.249052104553415 | 1 |
| COPD-HTN | ENSG00000105426 | 19 | 569  | 73 | 5E+05 | 0.007687 | PTPRS       | 0.248599726666667 | 1 |
| COPD-HTN | ENSG00000187957 | 2  | 1171 | 93 | 5E+05 | 0.007673 | DNER        | 0.248579857469244 | 1 |
| COPD-HTN | ENSG00000169126 | 10 | 463  | 23 | 5E+05 | 0.007616 | ARMC4       | 0.24714499084507  | 1 |
| COPD-HTN | ENSG00000159322 | 15 | 66   | 10 | 5E+05 | 0.007572 | ADPGK       | 0.246156947795414 | 1 |
| COPD-HTN | ENSG00000061987 | 12 | 284  | 18 | 5E+05 | 0.007567 | MON2        | 0.246156947795414 | 1 |
| COPD-HTN | ENSG00000159720 | 16 | 45   | 9  | 5E+05 | 0.007557 | ATP6V0D1    | 0.246156947795414 | 1 |
| COPD-HTN | ENSG00000132591 | 17 | 13   | 1  | 5E+05 | 0.007554 | ERAL1       | 0.246156947795414 | 1 |
| COPD-HTN | ENSG00000196604 | 2  | 5    | 2  | 5E+05 | 0.007547 | POTEF       | 0.246156947795414 | 1 |
| COPD-HTN | ENSG00000104327 | 8  | 55   | 8  | 5E+05 | 0.007523 | CALB1       | 0.246156947795414 | 1 |
| COPD-HTN | ENSG00000260869 | 16 | 26   | 8  | 5E+05 | 0.007523 | AC002310.13 | 0.246156947795414 | 1 |
| COPD-HTN | ENSG00000068137 | 17 | 7    | 3  | 5E+05 | 0.007501 | PLEKHH3     | 0.246156947795414 | 1 |
| COPD-HTN | ENSG00000162910 | 1  | 1    | 1  | 5E+05 | 0.007474 | MRPL55      | 0.246156947795414 | 1 |
| COPD-HTN | ENSG00000169592 | 16 | 25   | 5  | 5E+05 | 0.007456 | INO80E      | 0.246156947795414 | 1 |
| COPD-HTN | ENSG00000162620 | 1  | 263  | 13 | 5E+05 | 0.00744  | LRRIQ3      | 0.246156947795414 | 1 |
| COPD-HTN | ENSG00000183011 | 17 | 54   | 10 | 5E+05 | 0.007433 | LSMD1       | 0.246156947795414 | 1 |
| COPD-HTN | ENSG00000115648 | 2  | 329  | 16 | 5E+05 | 0.007425 | MLPH        | 0.246156947795414 | 1 |
| COPD-HTN | ENSG00000188501 | 15 | 46   | 9  | 5E+05 | 0.007419 | LCTL        | 0.246156947795414 | 1 |
| COPD-HTN | ENSG00000166689 | 11 | 701  | 42 | 5E+05 | 0.0074   | PLEKHA7     | 0.246156947795414 | 1 |
| COPD-HTN | ENSG00000150756 | 5  | 123  | 20 | 5E+05 | 0.007395 | FAM173B     | 0.246156947795414 | 1 |
| COPD-HTN | ENSG00000117528 | 1  | 101  | 12 | 5E+05 | 0.007373 | ABCD3       | 0.246156947795414 | 1 |
| COPD-HTN | ENSG00000090382 | 12 | 19   | 6  | 5E+05 | 0.007349 | LYZ         | 0.246156947795414 | 1 |
| COPD-HTN | ENSG00000198780 | 5  | 162  | 10 | 5E+05 | 0.007343 | FAM169A     | 0.246156947795414 | 1 |
| COPD-HTN | ENSG00000101203 | 20 | 115  | 11 | 5E+05 | 0.007339 | COL20A1     | 0.246156947795414 | 1 |
| COPD-HTN | ENSG00000171055 | 2  | 281  | 18 | 5E+05 | 0.007334 | FEZ2        | 0.246156947795414 | 1 |
| COPD-HTN | ENSG00000072163 | 2  | 153  | 27 | 5E+05 | 0.00731  | LIMS2       | 0.246156947795414 | 1 |
| COPD-HTN | ENSG00000269095 | 19 | 55   | 13 | 5E+05 | 0.007281 | AC010646.3  | 0.246156947795414 | 1 |
| COPD-HTN | ENSG00000113205 | 5  | 8    | 3  | 5E+05 | 0.007267 | PCDHB3      | 0.246156947795414 | 1 |
| COPD-HTN | ENSG00000221986 | 1  | 39   | 9  | 5E+05 | 0.007226 | MYBPHL      | 0.245284502394107 | 1 |
| COPD-HTN | ENSG00000176349 | 7  | 62   | 8  | 5E+05 | 0.007201 | AC110781.3  | 0.24489362804428  | 1 |
| COPD-HTN | ENSG00000173442 | 11 | 24   | 7  | 5E+05 | 0.007156 | EHBP1L1     | 0.243816459704251 | 1 |

|          |                 |    |      |     |       |          |               |                   |   |
|----------|-----------------|----|------|-----|-------|----------|---------------|-------------------|---|
| COPD-HTN | ENSG00000173065 | 17 | 125  | 6   | 5E+05 | 0.007101 | FAM222B       | 0.242400777037037 | 1 |
| COPD-HTN | ENSG00000140830 | 16 | 114  | 12  | 5E+05 | 0.007004 | TXNL4B        | 0.239519564749536 | 1 |
| COPD-HTN | ENSG00000184304 | 14 | 1312 | 100 | 5E+05 | 0.00697  | PRKD1         | 0.23881698866171  | 1 |
| COPD-HTN | ENSG00000183066 | 22 | 106  | 9   | 5E+05 | 0.006933 | WBP2NL        | 0.237967627188082 | 1 |
| COPD-HTN | ENSG00000182511 | 15 | 32   | 6   | 5E+05 | 0.006917 | FES           | 0.237857918843284 | 1 |
| COPD-HTN | ENSG00000165511 | 10 | 4    | 2   | 5E+05 | 0.006903 | C10orf25      | 0.237823599626168 | 1 |
| COPD-HTN | ENSG00000268126 | 5  | 1    | 1   | 5E+05 | 0.006871 | AC091948.1    | 0.237174718539326 | 1 |
| COPD-HTN | ENSG00000106952 | 9  | 90   | 6   | 5E+05 | 0.006859 | TNFSF8        | 0.237174718539326 | 1 |
| COPD-HTN | ENSG00000087460 | 20 | 155  | 31  | 5E+05 | 0.006858 | GNAS          | 0.237174718539326 | 1 |
| COPD-HTN | ENSG00000257017 | 16 | 6    | 2   | 5E+05 | 0.006836 | HP            | 0.237174718539326 | 1 |
| COPD-HTN | ENSG00000145743 | 5  | 1110 | 40  | 5E+05 | 0.006833 | FBXL17        | 0.237174718539326 | 1 |
| COPD-HTN | ENSG00000172733 | 8  | 49   | 9   | 5E+05 | 0.006824 | PURG          | 0.237174718539326 | 1 |
| COPD-HTN | ENSG00000166938 | 15 | 92   | 16  | 5E+05 | 0.006814 | DIS3L         | 0.237174718539326 | 1 |
| COPD-HTN | ENSG00000172201 | 6  | 12   | 5   | 5E+05 | 0.006811 | ID4           | 0.237174718539326 | 1 |
| COPD-HTN | ENSG00000172366 | 16 | 5    | 2   | 5E+05 | 0.006785 | FAM195A       | 0.237174718539326 | 1 |
| COPD-HTN | ENSG00000198920 | 17 | 177  | 16  | 5E+05 | 0.006752 | KIAA0753      | 0.237079979428571 | 1 |
| COPD-HTN | ENSG00000149932 | 16 | 40   | 5   | 5E+05 | 0.00675  | TMEM219       | 0.237079979428571 | 1 |
| COPD-HTN | ENSG00000108590 | 17 | 38   | 6   | 5E+05 | 0.006744 | MED31         | 0.237079979428571 | 1 |
| COPD-HTN | ENSG00000141314 | 17 | 168  | 24  | 5E+05 | 0.006708 | RHBDL3        | 0.236885237356322 | 1 |
| COPD-HTN | ENSG00000148795 | 10 | 18   | 3   | 5E+05 | 0.006637 | CYP17A1       | 0.234810238771593 | 1 |
| COPD-HTN | ENSG00000145332 | 4  | 143  | 17  | 5E+05 | 0.00663  | KLHL8         | 0.234810238771593 | 1 |
| COPD-HTN | ENSG0000015532  | 17 | 30   | 4   | 5E+05 | 0.006599 | XYLT2         | 0.23436547283237  | 1 |
| COPD-HTN | ENSG00000091536 | 17 | 131  | 17  | 5E+05 | 0.00657  | MYO15A        | 0.233778835521236 | 1 |
| COPD-HTN | ENSG00000174197 | 15 | 247  | 19  | 5E+05 | 0.006459 | MGA           | 0.230301973307544 | 1 |
| COPD-HTN | ENSG00000159479 | 1  | 4    | 2   | 5E+05 | 0.006458 | MED8          | 0.230301973307544 | 1 |
| COPD-HTN | ENSG00000263620 | 17 | 25   | 5   | 5E+05 | 0.006454 | RP11-599B13   | 0.230301973307544 | 1 |
| COPD-HTN | ENSG00000268241 | 2  | 2    | 1   | 5E+05 | 0.006433 | AC018470.1    | 0.230301973307544 | 1 |
| COPD-HTN | ENSG00000162777 | 1  | 42   | 14  | 5E+05 | 0.006429 | DENND2D       | 0.230301973307544 | 1 |
| COPD-HTN | ENSG00000258512 | 14 | 7    | 1   | 5E+05 | 0.006396 | RP11-796G6.10 | 0.2302684921875   | 1 |
| COPD-HTN | ENSG00000165895 | 11 | 1187 | 52  | 5E+05 | 0.00638  | ARHGAP42      | 0.230149171428571 | 1 |
| COPD-HTN | ENSG00000257955 | 12 | 25   | 5   | 5E+05 | 0.006379 | RP1-228P16.50 | 0.230149171428571 | 1 |
| COPD-HTN | ENSG00000170522 | 4  | 437  | 56  | 5E+05 | 0.006352 | ELOVL6        | 0.230021387229862 | 1 |
| COPD-HTN | ENSG00000156427 | 5  | 76   | 15  | 5E+05 | 0.006336 | FGF18         | 0.229886361220472 | 1 |

|          |                 |    |     |    |       |          |           |                   |   |
|----------|-----------------|----|-----|----|-------|----------|-----------|-------------------|---|
| COPD-HTN | ENSG00000213533 | 3  | 106 | 8  | 5E+05 | 0.006328 | TMEM110   | 0.229886361220472 | 1 |
| COPD-HTN | ENSG00000182179 | 3  | 6   | 2  | 5E+05 | 0.006311 | UBA7      | 0.229886361220472 | 1 |
| COPD-HTN | ENSG00000108242 | 10 | 128 | 14 | 5E+05 | 0.006279 | CYP2C18   | 0.229175116435644 | 1 |
| COPD-HTN | ENSG00000240891 | 3  | 535 | 34 | 5E+05 | 0.006257 | PLCXD2    | 0.228850815277778 | 1 |
| COPD-HTN | ENSG00000139318 | 12 | 26  | 5  | 5E+05 | 0.006239 | DUSP6     | 0.228616839960239 | 1 |
| COPD-HTN | ENSG00000137474 | 11 | 250 | 26 | 5E+05 | 0.00618  | MYO7A     | 0.226938870916335 | 1 |
| COPD-HTN | ENSG00000198380 | 2  | 110 | 6  | 5E+05 | 0.006166 | GFPT1     | 0.226862031936128 | 1 |
| COPD-HTN | ENSG00000114349 | 3  | 2   | 1  | 5E+05 | 0.006131 | GNAT1     | 0.226018073       | 1 |
| COPD-HTN | ENSG00000149131 | 11 | 36  | 4  | 5E+05 | 0.006123 | SERPING1  | 0.226018073       | 1 |
| COPD-HTN | ENSG00000089009 | 12 | 10  | 4  | 5E+05 | 0.006112 | RPL6      | 0.226018073       | 1 |
| COPD-HTN | ENSG00000153495 | 13 | 113 | 19 | 5E+05 | 0.006105 | TEX29     | 0.226018073       | 1 |
| COPD-HTN | ENSG00000196092 | 9  | 684 | 57 | 5E+05 | 0.006092 | PAX5      | 0.226018073       | 1 |
| COPD-HTN | ENSG00000116685 | 1  | 18  | 5  | 5E+05 | 0.00607  | KIAA2013  | 0.226018073       | 1 |
| COPD-HTN | ENSG00000162992 | 2  | 7   | 2  | 5E+05 | 0.006065 | NEUROD1   | 0.226018073       | 1 |
| COPD-HTN | ENSG00000090905 | 16 | 143 | 14 | 5E+05 | 0.006026 | TNRC6A    | 0.225297622920893 | 1 |
| COPD-HTN | ENSG00000185888 | 1  | 100 | 16 | 5E+05 | 0.006014 | PRSS38    | 0.225297622920893 | 1 |
| COPD-HTN | ENSG00000116514 | 1  | 48  | 6  | 5E+05 | 0.006011 | RNF19B    | 0.225297622920893 | 1 |
| COPD-HTN | ENSG00000180336 | 17 | 27  | 9  | 5E+05 | 0.00597  | C17orf104 | 0.22457036755102  | 1 |
| COPD-HTN | ENSG00000197128 | 19 | 38  | 4  | 5E+05 | 0.005935 | ZNF772    | 0.223725354396728 | 1 |
| COPD-HTN | ENSG00000129167 | 11 | 41  | 5  | 5E+05 | 0.005921 | TPH1      | 0.223639883401639 | 1 |
| COPD-HTN | ENSG00000133275 | 19 | 114 | 12 | 5E+05 | 0.005918 | CSNK1G2   | 0.223639883401639 | 1 |
| COPD-HTN | ENSG00000128965 | 15 | 5   | 2  | 5E+05 | 0.005893 | CHAC1     | 0.223513399794239 | 1 |
| COPD-HTN | ENSG00000115947 | 2  | 125 | 9  | 5E+05 | 0.005825 | ORC4      | 0.221367027835052 | 1 |
| COPD-HTN | ENSG00000138668 | 4  | 43  | 5  | 5E+05 | 0.005813 | HNRNPD    | 0.221367027835052 | 1 |
| COPD-HTN | ENSG00000162040 | 16 | 33  | 4  | 5E+05 | 0.005807 | HS3ST6    | 0.221367027835052 | 1 |
| COPD-HTN | ENSG00000180098 | 1  | 35  | 6  | 5E+05 | 0.005744 | TRNAU1AP  | 0.219673939004149 | 1 |
| COPD-HTN | ENSG00000137944 | 1  | 98  | 7  | 5E+05 | 0.005731 | CCBL2     | 0.219640116839917 | 1 |
| COPD-HTN | ENSG00000104447 | 8  | 482 | 21 | 5E+05 | 0.00571  | TRPS1     | 0.219287416458333 | 1 |
| COPD-HTN | ENSG00000133069 | 1  | 118 | 13 | 5E+05 | 0.005683 | TMCC2     | 0.218710046346555 | 1 |
| COPD-HTN | ENSG00000196387 | 12 | 5   | 1  | 5E+05 | 0.005683 | ZNF140    | 0.218710046346555 | 1 |
| COPD-HTN | ENSG00000205883 | 8  | 11  | 3  | 5E+05 | 0.005675 | DEFB135   | 0.218710046346555 | 1 |
| COPD-HTN | ENSG00000140832 | 16 | 30  | 6  | 5E+05 | 0.00566  | MARVELD3  | 0.218710046346555 | 1 |
| COPD-HTN | ENSG00000155363 | 1  | 51  | 9  | 5E+05 | 0.00565  | MOV10     | 0.218710046346555 | 1 |

|          |                 |    |     |    |       |          |            |                   |   |
|----------|-----------------|----|-----|----|-------|----------|------------|-------------------|---|
| COPD-HTN | ENSG00000176182 | 19 | 39  | 7  | 5E+05 | 0.005602 | MYPOP      | 0.217839949578059 | 1 |
| COPD-HTN | ENSG00000101210 | 20 | 46  | 12 | 5E+05 | 0.0056   | EEF1A2     | 0.217839949578059 | 1 |
| COPD-HTN | ENSG00000205971 | 7  | 4   | 2  | 5E+05 | 0.005548 | AC074389.6 | 0.216654140042373 | 1 |
| COPD-HTN | ENSG00000108669 | 17 | 133 | 13 | 5E+05 | 0.005468 | CYTH1      | 0.213979343524416 | 1 |
| COPD-HTN | ENSG00000198492 | 1  | 43  | 6  | 5E+05 | 0.005414 | YTHDF2     | 0.212340316170213 | 1 |
| COPD-HTN | ENSG00000248592 | 3  | 116 | 9  | 5E+05 | 0.005411 | TMEM110-M  | 0.212340316170213 | 1 |
| COPD-HTN | ENSG00000138435 | 2  | 43  | 6  | 5E+05 | 0.00541  | CHRNA1     | 0.212340316170213 | 1 |
| COPD-HTN | ENSG00000122406 | 1  | 9   | 3  | 5E+05 | 0.005367 | RPL5       | 0.211821615631692 | 1 |
| COPD-HTN | ENSG00000118369 | 11 | 45  | 8  | 5E+05 | 0.005318 | USP35      | 0.210349801287554 | 1 |
| COPD-HTN | ENSG00000130592 | 11 | 173 | 27 | 5E+05 | 0.005299 | LSP1       | 0.210068810537634 | 1 |
| COPD-HTN | ENSG00000215910 | 1  | 142 | 11 | 5E+05 | 0.005296 | C1orf167   | 0.210068810537634 | 1 |
| COPD-HTN | ENSG00000008838 | 17 | 79  | 8  | 5E+05 | 0.005282 | MED24      | 0.210068810537634 | 1 |
| COPD-HTN | ENSG00000261701 | 16 | 36  | 7  | 5E+05 | 0.005275 | HPR        | 0.210068810537634 | 1 |
| COPD-HTN | ENSG00000115138 | 2  | 14  | 6  | 5E+05 | 0.005268 | POMC       | 0.210068810537634 | 1 |
| COPD-HTN | ENSG00000163029 | 2  | 246 | 22 | 5E+05 | 0.005182 | SMC6       | 0.207631716304348 | 1 |
| COPD-HTN | ENSG00000188334 | 19 | 96  | 13 | 5E+05 | 0.005145 | BSPH1      | 0.206602204357298 | 1 |
| COPD-HTN | ENSG00000171105 | 19 | 658 | 68 | 5E+05 | 0.005101 | INSR       | 0.205302568340611 | 1 |
| COPD-HTN | ENSG00000117477 | 1  | 169 | 17 | 5E+05 | 0.005068 | CCDC181    | 0.2044086595186   | 1 |
| COPD-HTN | ENSG00000121797 | 3  | 18  | 4  | 5E+05 | 0.005033 | CCRL2      | 0.203458279824561 | 1 |
| COPD-HTN | ENSG00000140459 | 15 | 42  | 7  | 5E+05 | 0.005009 | CYP11A1    | 0.202908843516484 | 1 |
| COPD-HTN | ENSG00000100156 | 22 | 12  | 4  | 5E+05 | 0.004989 | SLC16A8    | 0.202568113656388 | 1 |
| COPD-HTN | ENSG00000141101 | 16 | 25  | 7  | 5E+05 | 0.004974 | NOB1       | 0.20237643598234  | 1 |
| COPD-HTN | ENSG00000103254 | 16 | 6   | 1  | 5E+05 | 0.004972 | FAM173A    | 0.20237643598234  | 1 |
| COPD-HTN | ENSG00000133706 | 5  | 236 | 6  | 5E+05 | 0.004964 | LARS       | 0.20237643598234  | 1 |
| COPD-HTN | ENSG00000164338 | 5  | 37  | 4  | 5E+05 | 0.004922 | UTP15      | 0.201599672888889 | 1 |
| COPD-HTN | ENSG00000102886 | 16 | 16  | 6  | 5E+05 | 0.004917 | GDPD3      | 0.201599672888889 | 1 |
| COPD-HTN | ENSG00000173626 | 6  | 134 | 12 | 5E+05 | 0.0049   | TRAPPC3L   | 0.201594479464286 | 1 |
| COPD-HTN | ENSG00000172977 | 11 | 22  | 5  | 5E+05 | 0.004855 | KAT5       | 0.200185678970917 | 1 |
| COPD-HTN | ENSG00000168772 | 4  | 25  | 4  | 5E+05 | 0.004848 | CXXC4      | 0.200185678970917 | 1 |
| COPD-HTN | ENSG00000163069 | 4  | 21  | 4  | 5E+05 | 0.004824 | SGCB       | 0.199834431235955 | 1 |
| COPD-HTN | ENSG00000267534 | 19 | 13  | 4  | 5E+05 | 0.004799 | S1PR2      | 0.199225856756757 | 1 |
| COPD-HTN | ENSG00000253958 | 8  | 15  | 2  | 5E+05 | 0.004716 | CLDN23     | 0.196217828668172 | 1 |
| COPD-HTN | ENSG00000104880 | 19 | 323 | 14 | 5E+05 | 0.004703 | ARHGEF18   | 0.196111272624434 | 1 |

|          |                 |    |      |     |       |          |              |                   |   |
|----------|-----------------|----|------|-----|-------|----------|--------------|-------------------|---|
| COPD-HTN | ENSG00000169955 | 16 | 6    | 3   | 5E+05 | 0.004701 | ZNF747       | 0.196111272624434 | 1 |
| COPD-HTN | ENSG00000117281 | 1  | 4    | 1   | 5E+05 | 0.004686 | CD160        | 0.196111272624434 | 1 |
| COPD-HTN | ENSG00000169344 | 16 | 55   | 6   | 5E+05 | 0.004664 | UMOD         | 0.195813884965831 | 1 |
| COPD-HTN | ENSG00000075239 | 11 | 44   | 7   | 5E+05 | 0.00463  | ACAT1        | 0.194859535616438 | 1 |
| COPD-HTN | ENSG00000169223 | 5  | 24   | 4   | 5E+05 | 0.004605 | LMAN2        | 0.194246700915332 | 1 |
| COPD-HTN | ENSG00000074201 | 11 | 229  | 19  | 5E+05 | 0.004594 | CLNS1A       | 0.194210257110092 | 1 |
| COPD-HTN | ENSG00000128285 | 22 | 7    | 2   | 5E+05 | 0.00457  | MCHR1        | 0.193635486896552 | 1 |
| COPD-HTN | ENSG00000253350 | 8  | 1987 | 103 | 5E+05 | 0.004547 | RP11-127H5.1 | 0.193126023732719 | 1 |
| COPD-HTN | ENSG00000129282 | 17 | 11   | 3   | 5E+05 | 0.004542 | MRM1         | 0.193126023732719 | 1 |
| COPD-HTN | ENSG00000156110 | 10 | 777  | 24  | 5E+05 | 0.004536 | ADK          | 0.193126023732719 | 1 |
| COPD-HTN | ENSG00000132781 | 1  | 14   | 6   | 5E+05 | 0.004521 | MUTYH        | 0.193126023732719 | 1 |
| COPD-HTN | ENSG00000130517 | 19 | 89   | 17  | 5E+05 | 0.004491 | PGPEP1       | 0.192513394651163 | 1 |
| COPD-HTN | ENSG00000198758 | 1  | 41   | 11  | 5E+05 | 0.004488 | EPS8L3       | 0.192513394651163 | 1 |
| COPD-HTN | ENSG00000174839 | 3  | 125  | 15  | 5E+05 | 0.004441 | DENND6A      | 0.191263908878505 | 1 |
| COPD-HTN | ENSG00000173261 | 5  | 46   | 2   | 5E+05 | 0.004436 | PLAC8L1      | 0.191263908878505 | 1 |
| COPD-HTN | ENSG00000149295 | 11 | 166  | 21  | 5E+05 | 0.004419 | DRD2         | 0.191201268544601 | 1 |
| COPD-HTN | ENSG00000197150 | 7  | 46   | 9   | 5E+05 | 0.004389 | ABCB8        | 0.190367349647059 | 1 |
| COPD-HTN | ENSG00000196748 | 6  | 7    | 3   | 5E+05 | 0.004361 | CLPSL2       | 0.189603403066038 | 1 |
| COPD-HTN | ENSG00000188452 | 2  | 337  | 22  | 5E+05 | 0.004353 | CERKL        | 0.189603403066038 | 1 |
| COPD-HTN | ENSG00000151006 | 16 | 12   | 3   | 5E+05 | 0.004342 | PRSS53       | 0.189603403066038 | 1 |
| COPD-HTN | ENSG00000196355 | 4  | 91   | 14  | 5E+05 | 0.004328 | AC021860.1   | 0.189500872446556 | 1 |
| COPD-HTN | ENSG00000109787 | 4  | 73   | 15  | 5E+05 | 0.004324 | KLF3         | 0.189500872446556 | 1 |
| COPD-HTN | ENSG00000170959 | 11 | 637  | 20  | 5E+05 | 0.004313 | DCDC1        | 0.189500872446556 | 1 |
| COPD-HTN | ENSG00000125630 | 2  | 91   | 10  | 5E+05 | 0.004308 | POLR1B       | 0.189500872446556 | 1 |
| COPD-HTN | ENSG00000121905 | 1  | 13   | 3   | 5E+05 | 0.004288 | HPCA         | 0.189500872446556 | 1 |
| COPD-HTN | ENSG00000100372 | 22 | 57   | 7   | 5E+05 | 0.004288 | SLC25A17     | 0.189500872446556 | 1 |
| COPD-HTN | ENSG00000143499 | 1  | 177  | 20  | 5E+05 | 0.004258 | SMYD2        | 0.189104813253012 | 1 |
| COPD-HTN | ENSG00000180198 | 1  | 57   | 7   | 5E+05 | 0.004174 | RCC1         | 0.185857178502415 | 1 |
| COPD-HTN | ENSG00000146674 | 7  | 19   | 6   | 5E+05 | 0.004157 | IGFBP3       | 0.185517210169492 | 1 |
| COPD-HTN | ENSG00000205593 | 22 | 63   | 10  | 5E+05 | 0.004138 | DENND6B      | 0.185144273300971 | 1 |
| COPD-HTN | ENSG00000145868 | 5  | 60   | 4   | 5E+05 | 0.004132 | FBXO38       | 0.185144273300971 | 1 |
| COPD-HTN | ENSG00000114999 | 2  | 99   | 10  | 5E+05 | 0.004099 | TTL          | 0.184289537317073 | 1 |
| COPD-HTN | ENSG00000169230 | 5  | 10   | 5   | 5E+05 | 0.004078 | PRELID1      | 0.183793685330073 | 1 |

|          |                 |    |      |    |       |          |             |                   |   |
|----------|-----------------|----|------|----|-------|----------|-------------|-------------------|---|
| COPD-HTN | ENSG00000157851 | 2  | 122  | 7  | 5E+05 | 0.004063 | DPYSL5      | 0.183570994117647 | 1 |
| COPD-HTN | ENSG00000175324 | 8  | 18   | 5  | 5E+05 | 0.004027 | LSM1        | 0.182364417199017 | 1 |
| COPD-HTN | ENSG00000187778 | 12 | 15   | 4  | 5E+05 | 0.004016 | MCRS1       | 0.182332334975369 | 1 |
| COPD-HTN | ENSG00000149596 | 20 | 269  | 34 | 5E+05 | 0.004008 | JPH2        | 0.182332334975369 | 1 |
| COPD-HTN | ENSG00000105722 | 19 | 8    | 1  | 5E+05 | 0.003957 | ERF         | 0.180524771782178 | 1 |
| COPD-HTN | ENSG00000177733 | 5  | 1    | 1  | 5E+05 | 0.003951 | HNRNPA0     | 0.180524771782178 | 1 |
| COPD-HTN | ENSG00000127337 | 12 | 111  | 11 | 5E+05 | 0.003924 | YEATS4      | 0.179918918905473 | 1 |
| COPD-HTN | ENSG00000157322 | 16 | 1    | 1  | 5E+05 | 0.003912 | CLEC18A     | 0.179802193266833 | 1 |
| COPD-HTN | ENSG00000007541 | 16 | 52   | 4  | 5E+05 | 0.003906 | PIGQ        | 0.179802193266833 | 1 |
| COPD-HTN | ENSG00000121989 | 2  | 93   | 10 | 5E+05 | 0.003902 | ACVR2A      | 0.179802193266833 | 1 |
| COPD-HTN | ENSG00000119772 | 2  | 182  | 34 | 5E+05 | 0.003835 | DNMT3A      | 0.177600565577889 | 1 |
| COPD-HTN | ENSG00000177981 | 12 | 80   | 11 | 5E+05 | 0.003831 | ASB8        | 0.177600565577889 | 1 |
| COPD-HTN | ENSG00000171456 | 20 | 91   | 7  | 5E+05 | 0.003829 | ASXL1       | 0.177600565577889 | 1 |
| COPD-HTN | ENSG00000037042 | 17 | 8    | 3  | 5E+05 | 0.003794 | TUBG2       | 0.177031465316456 | 1 |
| COPD-HTN | ENSG00000126351 | 17 | 50   | 12 | 5E+05 | 0.003784 | THRA        | 0.177008262690355 | 1 |
| COPD-HTN | ENSG00000112282 | 6  | 40   | 8  | 5E+05 | 0.00378  | MED23       | 0.177008262690355 | 1 |
| COPD-HTN | ENSG00000105723 | 19 | 12   | 3  | 5E+05 | 0.003773 | GSK3A       | 0.177008262690355 | 1 |
| COPD-HTN | ENSG00000138829 | 5  | 1094 | 32 | 5E+05 | 0.003768 | FBN2        | 0.177008262690355 | 1 |
| COPD-HTN | ENSG00000169194 | 5  | 8    | 2  | 5E+05 | 0.003718 | IL13        | 0.175713754102564 | 1 |
| COPD-HTN | ENSG00000055955 | 3  | 41   | 5  | 5E+05 | 0.003667 | ITIH4       | 0.17377722596401  | 1 |
| COPD-HTN | ENSG00000172548 | 5  | 45   | 7  | 5E+05 | 0.003639 | NIPAL4      | 0.17289013814433  | 1 |
| COPD-HTN | ENSG00000124177 | 20 | 438  | 25 | 5E+05 | 0.003613 | CHD6        | 0.172093726873385 | 1 |
| COPD-HTN | ENSG00000127578 | 16 | 15   | 3  | 5E+05 | 0.003588 | WFIKKN1     | 0.171345718393782 | 1 |
| COPD-HTN | ENSG00000204957 | 19 | 7    | 2  | 5E+05 | 0.003588 | AC006486.1  | 0.171345718393782 | 1 |
| COPD-HTN | ENSG00000113212 | 5  | 14   | 4  | 5E+05 | 0.003583 | PCDHB7      | 0.171345718393782 | 1 |
| COPD-HTN | ENSG00000243696 | 3  | 55   | 6  | 5E+05 | 0.003571 | RP5-966M1.6 | 0.171345718393782 | 1 |
| COPD-HTN | ENSG00000166147 | 15 | 353  | 13 | 5E+05 | 0.003537 | FBN1        | 0.170664487958115 | 1 |
| COPD-HTN | ENSG00000178035 | 3  | 4    | 2  | 5E+05 | 0.003523 | IMPDH2      | 0.170430260104987 | 1 |
| COPD-HTN | ENSG00000101152 | 20 | 132  | 14 | 5E+05 | 0.003436 | DNAJC5      | 0.166653723157895 | 1 |
| COPD-HTN | ENSG00000130203 | 19 | 5    | 2  | 5E+05 | 0.003413 | APOE        | 0.165999135356201 | 1 |
| COPD-HTN | ENSG00000140564 | 15 | 27   | 6  | 5E+05 | 0.003299 | FURIN       | 0.160888880687831 | 1 |
| COPD-HTN | ENSG00000116678 | 1  | 512  | 20 | 5E+05 | 0.003298 | LEPR        | 0.160888880687831 | 1 |
| COPD-HTN | ENSG00000178301 | 11 | 40   | 4  | 5E+05 | 0.003234 | AQP11       | 0.158558116755319 | 1 |

|          |                 |    |     |    |       |          |            |                   |   |
|----------|-----------------|----|-----|----|-------|----------|------------|-------------------|---|
| COPD-HTN | ENSG00000041357 | 15 | 22  | 3  | 5E+05 | 0.003213 | PSMA4      | 0.157914282133333 | 1 |
| COPD-HTN | ENSG00000268643 | 19 | 25  | 3  | 5E+05 | 0.003182 | AC006486.9 | 0.15682835828877  | 1 |
| COPD-HTN | ENSG00000204160 | 1  | 42  | 6  | 5E+05 | 0.00318  | ZDHHHC18   | 0.15682835828877  | 1 |
| COPD-HTN | ENSG00000168268 | 3  | 21  | 3  | 5E+05 | 0.003178 | NT5DC2     | 0.15682835828877  | 1 |
| COPD-HTN | ENSG00000268163 | 19 | 127 | 13 | 5E+05 | 0.003171 | AC004076.9 | 0.15682835828877  | 1 |
| COPD-HTN | ENSG00000115935 | 2  | 171 | 24 | 5E+05 | 0.003168 | WIPF1      | 0.15682835828877  | 1 |
| COPD-HTN | ENSG00000165379 | 14 | 691 | 31 | 5E+05 | 0.003153 | LRFN5      | 0.15682835828877  | 1 |
| COPD-HTN | ENSG00000108798 | 17 | 27  | 8  | 5E+05 | 0.003138 | ABI3       | 0.15682835828877  | 1 |
| COPD-HTN | ENSG00000255622 | 5  | 4   | 2  | 5E+05 | 0.003125 | PCDHB17    | 0.15682835828877  | 1 |
| COPD-HTN | ENSG00000258429 | 16 | 5   | 2  | 5E+05 | 0.003122 | PDF        | 0.15682835828877  | 1 |
| COPD-HTN | ENSG00000100883 | 14 | 175 | 16 | 5E+05 | 0.003106 | SRP54      | 0.15682835828877  | 1 |
| COPD-HTN | ENSG00000241644 | 7  | 147 | 25 | 5E+05 | 0.003    | INMT       | 0.151925393681319 | 1 |
| COPD-HTN | ENSG00000147434 | 8  | 88  | 9  | 5E+05 | 0.002991 | CHRNA6     | 0.151897060330579 | 1 |
| COPD-HTN | ENSG00000124571 | 6  | 56  | 7  | 5E+05 | 0.002977 | XPO5       | 0.151563051104972 | 1 |
| COPD-HTN | ENSG00000106546 | 7  | 41  | 10 | 5E+05 | 0.002974 | AHR        | 0.151563051104972 | 1 |
| COPD-HTN | ENSG00000163431 | 1  | 111 | 18 | 5E+05 | 0.002958 | LMOD1      | 0.151468057222222 | 1 |
| COPD-HTN | ENSG00000113520 | 5  | 15  | 2  | 5E+05 | 0.002954 | IL4        | 0.151468057222222 | 1 |
| COPD-HTN | ENSG00000105662 | 19 | 206 | 24 | 5E+05 | 0.002944 | CRTC1      | 0.151468057222222 | 1 |
| COPD-HTN | ENSG00000144035 | 2  | 2   | 1  | 5E+05 | 0.002936 | NAT8       | 0.151468057222222 | 1 |
| COPD-HTN | ENSG00000269755 | 19 | 183 | 11 | 5E+05 | 0.002934 | CTD-3105H1 | 0.151468057222222 | 1 |
| COPD-HTN | ENSG00000103591 | 15 | 100 | 8  | 5E+05 | 0.002885 | AAGAB      | 0.149805769859155 | 1 |
| COPD-HTN | ENSG00000163491 | 3  | 720 | 22 | 5E+05 | 0.002884 | NEK10      | 0.149805769859155 | 1 |
| COPD-HTN | ENSG00000142751 | 1  | 20  | 4  | 5E+05 | 0.002805 | GPN2       | 0.146471855524079 | 1 |
| COPD-HTN | ENSG00000033327 | 11 | 318 | 5  | 5E+05 | 0.002804 | GAB2       | 0.146471855524079 | 1 |
| COPD-HTN | ENSG00000182704 | 11 | 45  | 7  | 5E+05 | 0.002763 | TSKU       | 0.145106046438746 | 1 |
| COPD-HTN | ENSG00000137207 | 6  | 10  | 3  | 5E+05 | 0.002708 | YIPF3      | 0.142624020857143 | 1 |
| COPD-HTN | ENSG00000186907 | 11 | 14  | 6  | 5E+05 | 0.002666 | RTN4RL2    | 0.140782697707736 | 1 |
| COPD-HTN | ENSG00000102879 | 16 | 6   | 3  | 5E+05 | 0.00265  | CORO1A     | 0.140355641954023 | 1 |
| COPD-HTN | ENSG00000198670 | 6  | 214 | 17 | 5E+05 | 0.002649 | LPA        | 0.140355641954023 | 1 |
| COPD-HTN | ENSG00000135655 | 12 | 338 | 18 | 5E+05 | 0.002646 | USP15      | 0.140355641954023 | 1 |
| COPD-HTN | ENSG00000178033 | 6  | 37  | 6  | 5E+05 | 0.002644 | FAM26E     | 0.140355641954023 | 1 |
| COPD-HTN | ENSG00000115604 | 2  | 317 | 15 | 5E+05 | 0.002621 | IL18R1     | 0.140355641954023 | 1 |
| COPD-HTN | ENSG00000233538 | 2  | 1   | 1  | 5E+05 | 0.002601 | AC017104.2 | 0.139752234693878 | 1 |

|          |                 |    |     |    |       |          |              |                   |   |
|----------|-----------------|----|-----|----|-------|----------|--------------|-------------------|---|
| COPD-HTN | ENSG00000106261 | 7  | 39  | 8  | 5E+05 | 0.002598 | ZKSCAN1      | 0.139752234693878 | 1 |
| COPD-HTN | ENSG00000184838 | 5  | 664 | 40 | 5E+05 | 0.002596 | PRR16        | 0.139752234693878 | 1 |
| COPD-HTN | ENSG00000167536 | 17 | 7   | 3  | 5E+05 | 0.002575 | DHRS13       | 0.139624553529412 | 1 |
| COPD-HTN | ENSG00000173349 | 2  | 9   | 4  | 5E+05 | 0.002563 | SFT2D3       | 0.139356742477876 | 1 |
| COPD-HTN | ENSG00000185650 | 14 | 17  | 4  | 5E+05 | 0.002551 | ZFP36L1      | 0.139141882248521 | 1 |
| COPD-HTN | ENSG00000149930 | 16 | 23  | 3  | 5E+05 | 0.002545 | TAOK2        | 0.139141882248521 | 1 |
| COPD-HTN | ENSG00000254470 | 11 | 8   | 3  | 5E+05 | 0.002518 | AP5B1        | 0.138154237797619 | 1 |
| COPD-HTN | ENSG00000058335 | 15 | 353 | 55 | 5E+05 | 0.002517 | RASGRF1      | 0.138154237797619 | 1 |
| COPD-HTN | ENSG00000079459 | 8  | 234 | 25 | 5E+05 | 0.002508 | FDFT1        | 0.138154237797619 | 1 |
| COPD-HTN | ENSG00000220205 | 17 | 8   | 2  | 5E+05 | 0.002507 | VAMP2        | 0.138154237797619 | 1 |
| COPD-HTN | ENSG00000181019 | 16 | 46  | 10 | 5E+05 | 0.002488 | NQO1         | 0.138153114156627 | 1 |
| COPD-HTN | ENSG00000172432 | 6  | 21  | 4  | 5E+05 | 0.002474 | GTPBP2       | 0.137779713897281 | 1 |
| COPD-HTN | ENSG00000135519 | 12 | 37  | 6  | 5E+05 | 0.00247  | KCNH3        | 0.137779713897281 | 1 |
| COPD-HTN | ENSG00000213347 | 5  | 24  | 8  | 5E+05 | 0.002459 | MXD3         | 0.137779713897281 | 1 |
| COPD-HTN | ENSG00000102908 | 16 | 259 | 16 | 5E+05 | 0.002433 | NFAT5        | 0.136735769207317 | 1 |
| COPD-HTN | ENSG00000108963 | 17 | 35  | 11 | 5E+05 | 0.002392 | DPH1         | 0.134842750152905 | 1 |
| COPD-HTN | ENSG00000116489 | 1  | 64  | 9  | 5E+05 | 0.002373 | CAPZA1       | 0.134193370858896 | 1 |
| COPD-HTN | ENSG00000105364 | 19 | 16  | 5  | 5E+05 | 0.002371 | MRPL4        | 0.134193370858896 | 1 |
| COPD-HTN | ENSG00000180834 | 3  | 29  | 4  | 5E+05 | 0.002354 | MAP6D1       | 0.13390095308642  | 1 |
| COPD-HTN | ENSG00000158636 | 11 | 189 | 21 | 5E+05 | 0.002353 | C11orf30     | 0.13390095308642  | 1 |
| COPD-HTN | ENSG00000268870 | 19 | 219 | 8  | 5E+05 | 0.002337 | CTD-3105H1   | 0.133759465217391 | 1 |
| COPD-HTN | ENSG00000143079 | 1  | 144 | 5  | 5E+05 | 0.002317 | CTTNBP2NL    | 0.133027687850467 | 1 |
| COPD-HTN | ENSG00000204393 | 20 | 54  | 11 | 5E+05 | 0.002313 | RP11-410N8.4 | 0.133027687850467 | 1 |
| COPD-HTN | ENSG00000244624 | 21 | 1   | 1  | 5E+05 | 0.002308 | KRTAP20-1    | 0.133027687850467 | 1 |
| COPD-HTN | ENSG00000163347 | 3  | 82  | 18 | 5E+05 | 0.002306 | CLDN1        | 0.133027687850467 | 1 |
| COPD-HTN | ENSG00000007341 | 1  | 188 | 15 | 5E+05 | 0.002287 | ST7L         | 0.132990896845426 | 1 |
| COPD-HTN | ENSG00000132773 | 1  | 5   | 3  | 5E+05 | 0.002265 | TOE1         | 0.132099277848101 | 1 |
| COPD-HTN | ENSG00000125611 | 2  | 12  | 3  | 5E+05 | 0.002256 | CHCHD5       | 0.131997835238095 | 1 |
| COPD-HTN | ENSG00000167083 | 17 | 25  | 7  | 5E+05 | 0.002236 | GNGT2        | 0.131232393312102 | 1 |
| COPD-HTN | ENSG00000048649 | 11 | 305 | 12 | 5E+05 | 0.002221 | RSF1         | 0.130774184664537 | 1 |
| COPD-HTN | ENSG00000116127 | 2  | 357 | 12 | 5E+05 | 0.002213 | ALMS1        | 0.13076204775641  | 1 |
| COPD-HTN | ENSG00000171453 | 6  | 25  | 5  | 5E+05 | 0.002209 | POLR1C       | 0.13076204775641  | 1 |
| COPD-HTN | ENSG00000005955 | 17 | 69  | 10 | 5E+05 | 0.002187 | GGNBP2       | 0.130029949677419 | 1 |

|          |                 |    |     |    |       |          |          |                   |   |
|----------|-----------------|----|-----|----|-------|----------|----------|-------------------|---|
| COPD-HTN | ENSG00000170734 | 6  | 40  | 8  | 5E+05 | 0.002139 | POLH     | 0.12756948381877  | 1 |
| COPD-HTN | ENSG00000054282 | 1  | 381 | 27 | 5E+05 | 0.002123 | SDCCAG8  | 0.127032096753247 | 1 |
| COPD-HTN | ENSG00000091542 | 17 | 61  | 7  | 5E+05 | 0.002093 | ALKBH5   | 0.125668628664495 | 1 |
| COPD-HTN | ENSG00000171060 | 8  | 36  | 12 | 5E+05 | 0.002084 | C8orf74  | 0.125519091830065 | 1 |
| COPD-HTN | ENSG00000128908 | 15 | 110 | 11 | 5E+05 | 0.002083 | INO80    | 0.125519091830065 | 1 |
| COPD-HTN | ENSG00000055483 | 17 | 80  | 9  | 5E+05 | 0.002083 | USP36    | 0.125519091830065 | 1 |
| COPD-HTN | ENSG00000153107 | 2  | 131 | 11 | 5E+05 | 0.002059 | ANAPC1   | 0.125283565016502 | 1 |
| COPD-HTN | ENSG00000116406 | 1  | 110 | 13 | 5E+05 | 0.002031 | EDEM3    | 0.123964976821192 | 1 |
| COPD-HTN | ENSG00000161996 | 16 | 68  | 4  | 5E+05 | 0.00203  | WDR90    | 0.123964976821192 | 1 |
| COPD-HTN | ENSG00000162757 | 1  | 2   | 1  | 5E+05 | 0.00201  | C1orf74  | 0.123525677333333 | 1 |
| COPD-HTN | ENSG00000184489 | 8  | 100 | 14 | 5E+05 | 0.001977 | PTP4A3   | 0.121885900668896 | 1 |
| COPD-HTN | ENSG00000178951 | 19 | 37  | 7  | 5E+05 | 0.001971 | ZBTB7A   | 0.121885900668896 | 1 |
| COPD-HTN | ENSG00000117399 | 1  | 5   | 3  | 5E+05 | 0.001968 | CDC20    | 0.121885900668896 | 1 |
| COPD-HTN | ENSG00000152556 | 12 | 97  | 14 | 5E+05 | 0.001917 | PFKM     | 0.119391039189189 | 1 |
| COPD-HTN | ENSG00000168214 | 4  | 420 | 45 | 5E+05 | 0.001905 | RBPJ     | 0.119033440677966 | 1 |
| COPD-HTN | ENSG00000076604 | 17 | 7   | 2  | 5E+05 | 0.001896 | TRAF4    | 0.118842692176871 | 1 |
| COPD-HTN | ENSG00000077782 | 8  | 74  | 14 | 5E+05 | 0.001894 | FGFR1    | 0.118842692176871 | 1 |
| COPD-HTN | ENSG00000052344 | 16 | 4   | 2  | 5E+05 | 0.001892 | PRSS8    | 0.118842692176871 | 1 |
| COPD-HTN | ENSG00000106290 | 7  | 18  | 5  | 5E+05 | 0.00189  | TAF6     | 0.118842692176871 | 1 |
| COPD-HTN | ENSG00000253626 | 10 | 5   | 2  | 5E+05 | 0.001886 | EIF5AL1  | 0.118842692176871 | 1 |
| COPD-HTN | ENSG00000165512 | 10 | 15  | 4  | 5E+05 | 0.001854 | ZNF22    | 0.118258219031142 | 1 |
| COPD-HTN | ENSG00000272573 | 3  | 7   | 2  | 5E+05 | 0.001844 | MUSTN1   | 0.118048004166667 | 1 |
| COPD-HTN | ENSG00000149084 | 11 | 552 | 23 | 5E+05 | 0.001826 | HSD17B12 | 0.117303244599303 | 1 |
| COPD-HTN | ENSG00000116981 | 1  | 16  | 5  | 5E+05 | 0.001791 | NT5C1A   | 0.115406048251748 | 1 |
| COPD-HTN | ENSG00000117595 | 1  | 54  | 6  | 5E+05 | 0.001787 | IRF6     | 0.115406048251748 | 1 |
| COPD-HTN | ENSG00000113649 | 5  | 162 | 12 | 5E+05 | 0.00175  | TCERG1   | 0.113590117253521 | 1 |
| COPD-HTN | ENSG00000135074 | 5  | 583 | 31 | 5E+05 | 0.001747 | ADAM19   | 0.113590117253521 | 1 |
| COPD-HTN | ENSG00000123689 | 1  | 3   | 2  | 5E+05 | 0.001741 | G0S2     | 0.113590117253521 | 1 |
| COPD-HTN | ENSG00000197415 | 3  | 709 | 33 | 5E+05 | 0.001719 | VEPH1    | 0.112749609964413 | 1 |
| COPD-HTN | ENSG00000125520 | 20 | 11  | 3  | 5E+05 | 0.001697 | SLC2A4RG | 0.111743479285714 | 1 |
| COPD-HTN | ENSG00000221838 | 7  | 17  | 4  | 5E+05 | 0.001695 | AP4M1    | 0.111743479285714 | 1 |
| COPD-HTN | ENSG00000167395 | 16 | 13  | 3  | 5E+05 | 0.001681 | ZNF646   | 0.111479866546763 | 1 |
| COPD-HTN | ENSG00000185787 | 15 | 310 | 14 | 5E+05 | 0.001668 | MORF4L1  | 0.111010579783394 | 1 |

|          |                 |    |      |    |       |          |              |                    |   |
|----------|-----------------|----|------|----|-------|----------|--------------|--------------------|---|
| COPD-HTN | ENSG00000144152 | 2  | 112  | 17 | 5E+05 | 0.001619 | FBLN7        | 0.108146945289855  | 1 |
| COPD-HTN | ENSG00000107960 | 10 | 84   | 8  | 5E+05 | 0.001611 | OBFC1        | 0.108010677090909  | 1 |
| COPD-HTN | ENSG00000140463 | 15 | 92   | 14 | 5E+05 | 0.001609 | BBS4         | 0.108010677090909  | 1 |
| COPD-HTN | ENSG00000146555 | 7  | 3276 | 92 | 5E+05 | 0.001582 | SDK1         | 0.106823623809524  | 1 |
| COPD-HTN | ENSG00000268466 | 14 | 2    | 1  | 5E+05 | 0.001578 | AL132989.1   | 0.106823623809524  | 1 |
| COPD-HTN | ENSG00000054598 | 6  | 3    | 1  | 5E+05 | 0.001573 | FOXC1        | 0.106823623809524  | 1 |
| COPD-HTN | ENSG00000180855 | 19 | 66   | 5  | 5E+05 | 0.001496 | ZNF443       | 0.102098338888889  | 1 |
| COPD-HTN | ENSG00000147905 | 9  | 267  | 16 | 5E+05 | 0.001495 | ZCCHC7       | 0.102098338888889  | 1 |
| COPD-HTN | ENSG00000178922 | 1  | 6    | 3  | 5E+05 | 0.00147  | HYI          | 0.101092624626866  | 1 |
| COPD-HTN | ENSG00000228008 | 3  | 11   | 3  | 5E+05 | 0.001456 | CTD-2330K9   | 0.100484013108614  | 1 |
| COPD-HTN | ENSG00000131899 | 17 | 41   | 6  | 5E+05 | 0.001438 | LLGL1        | 0.0996282860902256 | 1 |
| COPD-HTN | ENSG00000164989 | 9  | 1250 | 16 | 5E+05 | 0.001403 | CCDC171      | 0.0976183856603773 | 1 |
| COPD-HTN | ENSG00000178685 | 8  | 54   | 4  | 5E+05 | 0.001401 | PARP10       | 0.0976183856603773 | 1 |
| COPD-HTN | ENSG00000079313 | 19 | 58   | 6  | 5E+05 | 0.0014   | REXO1        | 0.0976183856603773 | 1 |
| COPD-HTN | ENSG00000270316 | 10 | 132  | 13 | 5E+05 | 0.001389 | C10orf32-AS1 | 0.0976183856603773 | 1 |
| COPD-HTN | ENSG00000099365 | 16 | 25   | 5  | 5E+05 | 0.001383 | STX1B        | 0.0976183856603773 | 1 |
| COPD-HTN | ENSG00000137802 | 15 | 81   | 12 | 5E+05 | 0.001369 | MAPKBP1      | 0.0970426553846154 | 1 |
| COPD-HTN | ENSG00000164400 | 5  | 4    | 2  | 5E+05 | 0.001366 | CSF2         | 0.0970426553846154 | 1 |
| COPD-HTN | ENSG00000166292 | 17 | 8    | 3  | 5E+05 | 0.001345 | TMEM100      | 0.0961016600775194 | 1 |
| COPD-HTN | ENSG00000133812 | 11 | 1530 | 32 | 5E+05 | 0.001345 | SBF2         | 0.0961016600775194 | 1 |
| COPD-HTN | ENSG00000072778 | 17 | 10   | 3  | 5E+05 | 0.00133  | ACADV1       | 0.09577959609375   | 1 |
| COPD-HTN | ENSG00000108272 | 17 | 16   | 4  | 5E+05 | 0.001324 | DHRS11       | 0.0956781129411765 | 1 |
| COPD-HTN | ENSG00000177455 | 16 | 6    | 3  | 5E+05 | 0.001319 | CD19         | 0.0956781129411765 | 1 |
| COPD-HTN | ENSG00000120915 | 8  | 141  | 10 | 5E+05 | 0.001302 | EPHX2        | 0.0948534494071146 | 1 |
| COPD-HTN | ENSG00000170296 | 17 | 3    | 2  | 5E+05 | 0.001298 | GABARAP      | 0.0948534494071146 | 1 |
| COPD-HTN | ENSG00000262526 | 17 | 3    | 2  | 5E+05 | 0.001298 | CTD-2545G1   | 0.0948534494071146 | 1 |
| COPD-HTN | ENSG00000121848 | 1  | 5    | 2  | 5E+05 | 0.001294 | RNF115       | 0.0948534494071146 | 1 |
| COPD-HTN | ENSG00000269383 | 2  | 1    | 1  | 5E+05 | 0.001292 | AC012493.2   | 0.0948534494071146 | 1 |
| COPD-HTN | ENSG00000137877 | 15 | 130  | 22 | 5E+05 | 0.00127  | SPTBN5       | 0.0943799330645161 | 1 |
| COPD-HTN | ENSG00000158019 | 2  | 834  | 40 | 5E+05 | 0.001263 | BRE          | 0.0942844218623482 | 1 |
| COPD-HTN | ENSG00000196911 | 6  | 79   | 9  | 5E+05 | 0.001253 | KPNA5        | 0.0939033967479675 | 1 |
| COPD-HTN | ENSG00000102967 | 16 | 47   | 8  | 5E+05 | 0.00124  | DHODH        | 0.0932559326530612 | 1 |
| COPD-HTN | ENSG00000255439 | 16 | 19   | 4  | 5E+05 | 0.00122  | RP11-196G11  | 0.0921272274590164 | 1 |

|          |                 |    |     |    |       |          |            |                    |   |
|----------|-----------------|----|-----|----|-------|----------|------------|--------------------|---|
| COPD-HTN | ENSG0000064651  | 5  | 146 | 12 | 5E+05 | 0.001194 | SLC12A2    | 0.0906023670781893 | 1 |
| COPD-HTN | ENSG00000213380 | 16 | 44  | 7  | 5E+05 | 0.001178 | COG8       | 0.0897275785123967 | 1 |
| COPD-HTN | ENSG00000111834 | 6  | 46  | 10 | 5E+05 | 0.001166 | RSPH4A     | 0.0891973634854772 | 1 |
| COPD-HTN | ENSG00000131067 | 20 | 45  | 6  | 5E+05 | 0.001157 | GGT7       | 0.088824019        | 1 |
| COPD-HTN | ENSG00000204138 | 1  | 330 | 9  | 5E+05 | 0.001156 | PHACTR4    | 0.088824019        | 1 |
| COPD-HTN | ENSG00000101350 | 20 | 69  | 7  | 5E+05 | 0.001148 | KIF3B      | 0.088824019        | 1 |
| COPD-HTN | ENSG00000143156 | 1  | 680 | 19 | 5E+05 | 0.001141 | NME7       | 0.0887195067510548 | 1 |
| COPD-HTN | ENSG00000214435 | 10 | 99  | 11 | 5E+05 | 0.00113  | AS3MT      | 0.0882675139830509 | 1 |
| COPD-HTN | ENSG00000134871 | 13 | 901 | 94 | 5E+05 | 0.001112 | COL4A2     | 0.0871841680851064 | 1 |
| COPD-HTN | ENSG00000177731 | 17 | 20  | 6  | 5E+05 | 0.00111  | FLII       | 0.0871841680851064 | 1 |
| COPD-HTN | ENSG00000154328 | 8  | 93  | 14 | 5E+05 | 0.001087 | NEIL2      | 0.0860101184549356 | 1 |
| COPD-HTN | ENSG00000154783 | 3  | 467 | 32 | 5E+05 | 0.001077 | FGD5       | 0.0855704353448276 | 1 |
| COPD-HTN | ENSG00000157315 | 16 | 18  | 7  | 5E+05 | 0.001072 | TMED6      | 0.0855578467532468 | 1 |
| COPD-HTN | ENSG00000182450 | 11 | 6   | 2  | 5E+05 | 0.000998 | KCNK4      | 0.0800152486956522 | 1 |
| COPD-HTN | ENSG00000124469 | 19 | 13  | 6  | 5E+05 | 0.000996 | CEACAM8    | 0.0800152486956522 | 1 |
| COPD-HTN | ENSG00000124688 | 6  | 13  | 4  | 5E+05 | 0.000994 | MAD2L1BP   | 0.0800152486956522 | 1 |
| COPD-HTN | ENSG00000176953 | 16 | 17  | 5  | 5E+05 | 0.000991 | NFATC2IP   | 0.0800152486956522 | 1 |
| COPD-HTN | ENSG00000137962 | 1  | 176 | 25 | 5E+05 | 0.000986 | ARHGAP29   | 0.0800152486956522 | 1 |
| COPD-HTN | ENSG00000173868 | 17 | 16  | 5  | 5E+05 | 0.00098  | PHOSPHO1   | 0.0800152486956522 | 1 |
| COPD-HTN | ENSG00000109118 | 17 | 35  | 7  | 5E+05 | 0.000973 | PHF12      | 0.0800152486956522 | 1 |
| COPD-HTN | ENSG00000082258 | 2  | 75  | 7  | 5E+05 | 0.000942 | CCNT2      | 0.0779038094618834 | 1 |
| COPD-HTN | ENSG00000162374 | 1  | 172 | 27 | 5E+05 | 0.000929 | ELAVL4     | 0.0771188561711712 | 1 |
| COPD-HTN | ENSG00000204882 | 8  | 39  | 7  | 5E+05 | 0.000909 | GPR20      | 0.07584720760181   | 1 |
| COPD-HTN | ENSG00000198892 | 1  | 7   | 3  | 5E+05 | 0.000896 | SHISA4     | 0.0750616895909091 | 1 |
| COPD-HTN | ENSG00000138600 | 15 | 191 | 15 | 5E+05 | 0.000891 | SPPL2A     | 0.0749987426940639 | 1 |
| COPD-HTN | ENSG00000164116 | 4  | 176 | 26 | 5E+05 | 0.000832 | GUCY1A3    | 0.0703870023853211 | 1 |
| COPD-HTN | ENSG00000149782 | 11 | 25  | 8  | 5E+05 | 0.000832 | PLCB3      | 0.0703870023853211 | 1 |
| COPD-HTN | ENSG00000217075 | 2  | 47  | 8  | 5E+05 | 0.000832 | AC007401.2 | 0.0703870023853211 | 1 |
| COPD-HTN | ENSG00000119669 | 14 | 4   | 2  | 5E+05 | 0.00082  | IRF2BPL    | 0.0703274677674419 | 1 |
| COPD-HTN | ENSG00000189377 | 19 | 14  | 2  | 5E+05 | 0.000805 | CXCL17     | 0.0693528704672897 | 1 |
| COPD-HTN | ENSG00000197256 | 19 | 111 | 12 | 5E+05 | 0.000796 | KANK2      | 0.0689074002347418 | 1 |
| COPD-HTN | ENSG00000169900 | 16 | 1   | 1  | 5E+05 | 0.00079  | PYDC1      | 0.0686490133018868 | 1 |
| COPD-HTN | ENSG00000129951 | 19 | 33  | 7  | 5E+05 | 0.000786 | LPPR3      | 0.0686490133018868 | 1 |

|          |                 |    |      |    |       |          |               |                    |   |
|----------|-----------------|----|------|----|-------|----------|---------------|--------------------|---|
| COPD-HTN | ENSG00000164330 | 5  | 678  | 51 | 5E+05 | 0.000784 | EBF1          | 0.0686490133018868 | 1 |
| COPD-HTN | ENSG00000158186 | 3  | 122  | 10 | 5E+05 | 0.000738 | MRAS          | 0.0650570244976077 | 1 |
| COPD-HTN | ENSG00000106536 | 7  | 1331 | 53 | 5E+05 | 0.000731 | POU6F2        | 0.0647981984134616 | 1 |
| COPD-HTN | ENSG00000111605 | 12 | 54   | 9  | 5E+05 | 0.000715 | CPSF6         | 0.0636383741545894 | 1 |
| COPD-HTN | ENSG00000144730 | 3  | 190  | 20 | 5E+05 | 0.00071  | IL17RD        | 0.063505264223301  | 1 |
| COPD-HTN | ENSG00000167394 | 16 | 14   | 2  | 5E+05 | 0.000705 | ZNF668        | 0.0633816457073171 | 1 |
| COPD-HTN | ENSG00000189308 | 4  | 191  | 9  | 5E+05 | 0.000704 | LIN54         | 0.0633816457073171 | 1 |
| COPD-HTN | ENSG00000103496 | 16 | 17   | 3  | 5E+05 | 0.000696 | STX4          | 0.0631543636945813 | 1 |
| COPD-HTN | ENSG00000079387 | 12 | 155  | 15 | 5E+05 | 0.00069  | SENP1         | 0.0629240568316832 | 1 |
| COPD-HTN | ENSG00000132603 | 16 | 14   | 5  | 5E+05 | 0.000685 | NIP7          | 0.0628391057711443 | 1 |
| COPD-HTN | ENSG00000181163 | 5  | 56   | 6  | 5E+05 | 0.000666 | NPM1          | 0.061423364        | 1 |
| COPD-HTN | ENSG00000197114 | 20 | 70   | 7  | 5E+05 | 0.000662 | ZGPAT         | 0.0613077874874372 | 1 |
| COPD-HTN | ENSG00000033867 | 3  | 353  | 21 | 5E+05 | 0.000655 | SLC4A7        | 0.0610150919191919 | 1 |
| COPD-HTN | ENSG00000130940 | 1  | 377  | 67 | 5E+05 | 0.000651 | CASZ1         | 0.0608672630964467 | 1 |
| COPD-HTN | ENSG00000259900 | 16 | 35   | 8  | 5E+05 | 0.000642 | RP11-343C2.7  | 0.0604160384183674 | 1 |
| COPD-HTN | ENSG00000178719 | 8  | 3    | 1  | 5E+05 | 0.000632 | GRINA         | 0.059729536974359  | 1 |
| COPD-HTN | ENSG00000115525 | 2  | 143  | 13 | 5E+05 | 0.000627 | ST3GAL5       | 0.0595651943298969 | 1 |
| COPD-HTN | ENSG00000273154 | 20 | 75   | 7  | 5E+05 | 0.000626 | RP4-583P15.10 | 0.0595651943298969 | 1 |
| COPD-HTN | ENSG00000159788 | 4  | 285  | 30 | 5E+05 | 0.000612 | RGS12         | 0.0587542274479167 | 1 |
| COPD-HTN | ENSG00000153086 | 2  | 102  | 6  | 5E+05 | 0.000611 | ACMSD         | 0.0587542274479167 | 1 |
| COPD-HTN | ENSG00000130584 | 20 | 360  | 19 | 5E+05 | 0.00061  | ZBTB46        | 0.0587542274479167 | 1 |
| COPD-HTN | ENSG00000129968 | 19 | 16   | 3  | 5E+05 | 0.000609 | ABHD17A       | 0.0587542274479167 | 1 |
| COPD-HTN | ENSG00000243509 | 20 | 10   | 2  | 5E+05 | 0.000601 | TNFRSF6B      | 0.0587542274479167 | 1 |
| COPD-HTN | ENSG00000197272 | 16 | 22   | 5  | 5E+05 | 0.000574 | IL27          | 0.0565824099465241 | 1 |
| COPD-HTN | ENSG00000138663 | 4  | 47   | 9  | 5E+05 | 0.00057  | COPS4         | 0.0564624592473118 | 1 |
| COPD-HTN | ENSG00000176974 | 17 | 81   | 9  | 5E+05 | 0.000561 | SHMT1         | 0.0559366821621622 | 1 |
| COPD-HTN | ENSG00000109758 | 4  | 34   | 11 | 5E+05 | 0.000554 | HGFAC         | 0.0554723102717391 | 1 |
| COPD-HTN | ENSG00000260371 | 16 | 38   | 10 | 5E+05 | 0.000549 | RP11-343C2.5  | 0.0553413052459016 | 1 |
| COPD-HTN | ENSG00000163660 | 3  | 24   | 4  | 5E+05 | 0.000536 | CCNL1         | 0.0542932874175824 | 1 |
| COPD-HTN | ENSG00000164077 | 3  | 21   | 5  | 5E+05 | 0.000535 | MON1A         | 0.0542932874175824 | 1 |
| COPD-HTN | ENSG00000128585 | 7  | 880  | 83 | 5E+05 | 0.000528 | MKLN1         | 0.0541182639444444 | 1 |
| COPD-HTN | ENSG00000177374 | 17 | 9    | 4  | 5E+05 | 0.000499 | HIC1          | 0.0514074744692738 | 1 |
| COPD-HTN | ENSG00000188981 | 4  | 90   | 7  | 5E+05 | 0.000489 | MSANTD1       | 0.0506037628089888 | 1 |

|          |                 |    |      |     |       |          |              |                    |   |
|----------|-----------------|----|------|-----|-------|----------|--------------|--------------------|---|
| COPD-HTN | ENSG00000141076 | 16 | 160  | 20  | 5E+05 | 0.000481 | CIRH1A       | 0.0501263044632768 | 1 |
| COPD-HTN | ENSG00000148842 | 10 | 368  | 18  | 5E+05 | 0.000461 | CNNM2        | 0.0483279745454546 | 1 |
| COPD-HTN | ENSG00000187492 | 3  | 14   | 5   | 5E+05 | 0.000453 | CDHR4        | 0.047748843        | 1 |
| COPD-HTN | ENSG00000102882 | 16 | 11   | 4   | 5E+05 | 0.000444 | MAPK3        | 0.0469946156896552 | 1 |
| COPD-HTN | ENSG00000136709 | 2  | 228  | 25  | 5E+05 | 0.000427 | WDR33        | 0.0454900868208093 | 1 |
| COPD-HTN | ENSG00000157388 | 3  | 689  | 67  | 5E+05 | 0.000417 | CACNA1D      | 0.044695738255814  | 1 |
| COPD-HTN | ENSG00000115526 | 2  | 41   | 6   | 5E+05 | 0.000414 | CHST10       | 0.0446003143274854 | 1 |
| COPD-HTN | ENSG00000136378 | 15 | 76   | 13  | 5E+05 | 0.000412 | ADAMTS7      | 0.0446003143274854 | 1 |
| COPD-HTN | ENSG00000138785 | 4  | 427  | 13  | 5E+05 | 0.000403 | INTS12       | 0.0440090601775148 | 1 |
| COPD-HTN | ENSG00000101336 | 20 | 74   | 9   | 5E+05 | 0.000403 | HCK          | 0.0440090601775148 | 1 |
| COPD-HTN | ENSG00000258366 | 20 | 159  | 18  | 5E+05 | 0.000398 | RTEL1        | 0.0439268323952096 | 1 |
| COPD-HTN | ENSG00000164078 | 3  | 20   | 4   | 5E+05 | 0.000394 | MST1R        | 0.0437173018072289 | 1 |
| COPD-HTN | ENSG00000061455 | 5  | 344  | 25  | 5E+05 | 0.000391 | PRDM6        | 0.0437074358787879 | 1 |
| COPD-HTN | ENSG00000168152 | 4  | 33   | 4   | 5E+05 | 0.000381 | THAP9        | 0.0428308738414634 | 1 |
| COPD-HTN | ENSG00000138780 | 4  | 300  | 11  | 5E+05 | 0.000381 | GSTCD        | 0.0428308738414634 | 1 |
| COPD-HTN | ENSG00000178201 | 19 | 2    | 1   | 5E+05 | 0.00038  | VN1R1        | 0.0428308738414634 | 1 |
| COPD-HTN | ENSG00000273047 | 20 | 5    | 2   | 5E+05 | 0.000372 | RP4-583P15.1 | 0.0425859545341615 | 1 |
| COPD-HTN | ENSG00000167397 | 16 | 7    | 3   | 5E+05 | 0.000355 | VKORC1       | 0.040916652        | 1 |
| COPD-HTN | ENSG00000153975 | 6  | 68   | 9   | 5E+05 | 0.000354 | ZUFSP        | 0.040916652        | 1 |
| COPD-HTN | ENSG00000103507 | 16 | 6    | 2   | 5E+05 | 0.000327 | BCKDK        | 0.0381493101265823 | 1 |
| COPD-HTN | ENSG00000066056 | 1  | 26   | 3   | 5E+05 | 0.000324 | TIE1         | 0.0380189430573248 | 1 |
| COPD-HTN | ENSG00000111832 | 6  | 57   | 9   | 5E+05 | 0.00032  | RWDD1        | 0.0377663811538462 | 1 |
| COPD-HTN | ENSG00000026036 | 20 | 164  | 19  | 5E+05 | 0.000318 | RTEL1-TNFR   | 0.0377663811538462 | 1 |
| COPD-HTN | ENSG00000197479 | 5  | 6    | 2   | 5E+05 | 0.000309 | PCDHB11      | 0.0369402107792208 | 1 |
| COPD-HTN | ENSG00000165995 | 10 | 1367 | 101 | 5E+05 | 0.000308 | CACNB2       | 0.0369402107792208 | 1 |
| COPD-HTN | ENSG00000168769 | 4  | 233  | 28  | 5E+05 | 0.0003   | TET2         | 0.0364294289473684 | 1 |
| COPD-HTN | ENSG00000079385 | 19 | 41   | 6   | 5E+05 | 0.0003   | CEACAM1      | 0.0364294289473684 | 1 |
| COPD-HTN | ENSG00000177302 | 17 | 77   | 8   | 5E+05 | 0.000299 | TOP3A        | 0.0364294289473684 | 1 |
| COPD-HTN | ENSG00000196502 | 16 | 47   | 5   | 5E+05 | 0.000296 | SULT1A1      | 0.0364294289473684 | 1 |
| COPD-HTN | ENSG00000153815 | 16 | 1031 | 94  | 5E+05 | 0.000292 | CMIP         | 0.0363055371621622 | 1 |
| COPD-HTN | ENSG00000181873 | 1  | 16   | 4   | 5E+05 | 0.000291 | IBA57        | 0.0363055371621622 | 1 |
| COPD-HTN | ENSG00000076685 | 10 | 218  | 16  | 5E+05 | 0.000282 | NT5C2        | 0.0355504393150685 | 1 |
| COPD-HTN | ENSG00000143761 | 1  | 25   | 6   | 5E+05 | 0.000279 | ARF1         | 0.0354828893793103 | 1 |

|          |                 |    |     |    |       |          |               |                    |   |
|----------|-----------------|----|-----|----|-------|----------|---------------|--------------------|---|
| COPD-HTN | ENSG00000203896 | 20 | 8   | 2  | 5E+05 | 0.000272 | LIME1         | 0.0348191689583333 | 1 |
| COPD-HTN | ENSG00000170606 | 5  | 92  | 6  | 5E+05 | 0.000272 | HSPA4         | 0.0348191689583333 | 1 |
| COPD-HTN | ENSG00000175029 | 10 | 639 | 60 | 5E+05 | 0.000271 | CTBP2         | 0.0348191689583333 | 1 |
| COPD-HTN | ENSG00000176994 | 17 | 33  | 5  | 5E+05 | 0.000271 | SMCR8         | 0.0348191689583333 | 1 |
| COPD-HTN | ENSG00000272617 | 16 | 12  | 3  | 5E+05 | 0.000262 | RP11-343C2.10 | 0.0344894596428571 | 1 |
| COPD-HTN | ENSG00000120324 | 5  | 4   | 2  | 5E+05 | 0.000259 | PCDHB10       | 0.0343888169784173 | 1 |
| COPD-HTN | ENSG00000180592 | 10 | 7   | 2  | 5E+05 | 0.000257 | SKIDA1        | 0.0343414804347826 | 1 |
| COPD-HTN | ENSG00000169783 | 15 | 576 | 34 | 5E+05 | 0.000253 | LINGO1        | 0.0340714495620438 | 1 |
| COPD-HTN | ENSG00000198700 | 1  | 82  | 13 | 5E+05 | 0.000253 | IPO9          | 0.0340714495620438 | 1 |
| COPD-HTN | ENSG00000111249 | 12 | 334 | 27 | 5E+05 | 0.000248 | CUX2          | 0.0338402571851852 | 1 |
| COPD-HTN | ENSG00000154319 | 8  | 253 | 20 | 5E+05 | 0.000246 | FAM167A       | 0.0338402571851852 | 1 |
| COPD-HTN | ENSG00000186998 | 22 | 171 | 27 | 5E+05 | 0.000234 | EMID1         | 0.0323783267669173 | 1 |
| COPD-HTN | ENSG00000255524 | 16 | 3   | 2  | 5E+05 | 0.000233 | NPIP8         | 0.0323783267669173 | 1 |
| COPD-HTN | ENSG00000178149 | 3  | 4   | 2  | 5E+05 | 0.000214 | DALRD3        | 0.0301428798473282 | 1 |
| COPD-HTN | ENSG00000101246 | 20 | 14  | 2  | 5E+05 | 0.000214 | ARFRP1        | 0.0301428798473282 | 1 |
| COPD-HTN | ENSG00000166165 | 14 | 5   | 2  | 5E+05 | 0.000211 | CKB           | 0.0301428798473282 | 1 |
| COPD-HTN | ENSG00000117971 | 15 | 153 | 20 | 5E+05 | 0.000206 | CHRN4         | 0.02972609265625   | 1 |
| COPD-HTN | ENSG00000198198 | 1  | 83  | 7  | 5E+05 | 0.000198 | SZT2          | 0.0287801540944882 | 1 |
| COPD-HTN | ENSG00000156931 | 3  | 413 | 22 | 5E+05 | 0.000197 | VPS8          | 0.0287801540944882 | 1 |
| COPD-HTN | ENSG00000177710 | 8  | 8   | 2  | 5E+05 | 0.000189 | SLC35G5       | 0.027853           | 1 |
| COPD-HTN | ENSG00000205089 | 5  | 6   | 2  | 5E+05 | 0.000185 | CCNI2         | 0.0275365235483871 | 1 |
| COPD-HTN | ENSG00000145020 | 3  | 8   | 2  | 5E+05 | 0.00017  | AMT           | 0.0254824985365854 | 1 |
| COPD-HTN | ENSG00000187555 | 16 | 178 | 17 | 5E+05 | 0.000166 | USP7          | 0.0250839890163934 | 1 |
| COPD-HTN | ENSG00000103510 | 16 | 22  | 4  | 5E+05 | 0.000147 | KAT8          | 0.0223785760330578 | 1 |
| COPD-HTN | ENSG00000117400 | 1  | 13  | 3  | 5E+05 | 0.000146 | MPL           | 0.022354621        | 1 |
| COPD-HTN | ENSG00000178952 | 16 | 7   | 2  | 5E+05 | 0.000143 | TUFM          | 0.0221196          | 1 |
| COPD-HTN | ENSG00000183763 | 3  | 35  | 5  | 5E+05 | 0.000143 | TRAIP         | 0.0221196          | 1 |
| COPD-HTN | ENSG00000143816 | 1  | 79  | 9  | 5E+05 | 0.000137 | WNT9A         | 0.0216091476923077 | 1 |
| COPD-HTN | ENSG00000196296 | 16 | 24  | 4  | 5E+05 | 0.000137 | ATP2A1        | 0.0216091476923077 | 1 |
| COPD-HTN | ENSG00000178188 | 16 | 41  | 3  | 5E+05 | 0.000125 | SH2B1         | 0.0201128073043478 | 1 |
| COPD-HTN | ENSG00000132535 | 17 | 36  | 7  | 5E+05 | 0.000123 | DLG4          | 0.0198235596491228 | 1 |
| COPD-HTN | ENSG00000213658 | 16 | 6   | 3  | 5E+05 | 0.000118 | LAT           | 0.0191915261061947 | 1 |
| COPD-HTN | ENSG00000168488 | 16 | 26  | 2  | 5E+05 | 0.000115 | ATXN2L        | 0.0189777609821429 | 1 |

|          |                 |    |      |    |       |            |            |                     |             |
|----------|-----------------|----|------|----|-------|------------|------------|---------------------|-------------|
| COPD-HTN | ENSG00000108342 | 17 | 11   | 3  | 5E+05 | 0.000114   | CSF3       | 0.0189777609821429  | 1           |
| COPD-HTN | ENSG00000104643 | 8  | 102  | 8  | 5E+05 | 0.000113   | MTMR9      | 0.0189022036363636  | 1           |
| COPD-HTN | ENSG00000184730 | 16 | 11   | 3  | 5E+05 | 0.000112   | APOBR      | 0.0188946705504587  | 1           |
| COPD-HTN | ENSG00000170500 | 2  | 160  | 9  | 5E+05 | 0.000109   | LONRF2     | 0.0185524731481481  | 1           |
| COPD-HTN | ENSG00000236699 | 4  | 374  | 31 | 5E+05 | 0.000108   | ARHGEF38   | 0.0185524731481481  | 1           |
| COPD-HTN | ENSG00000168807 | 16 | 220  | 21 | 5E+05 | 0.000106   | SNTB2      | 0.0184747350943396  | 1           |
| COPD-HTN | ENSG00000125347 | 5  | 36   | 2  | 5E+05 | 0.000105   | IRF1       | 0.0184681104761905  | 1           |
| COPD-HTN | ENSG00000177548 | 16 | 30   | 7  | 5E+05 | 0.000101   | RABEP2     | 0.0179650853846154  | 1           |
| COPD-HTN | ENSG00000176476 | 16 | 77   | 9  | 5E+05 | 9.6188e-05 | CCDC101    | 0.0172139165436893  | 1           |
| COPD-HTN | ENSG00000172037 | 3  | 10   | 6  | 5E+05 | 8.5042e-05 | LAMB2      | 0.0153684233921569  | 1           |
| COPD-HTN | ENSG00000164076 | 3  | 15   | 3  | 5E+05 | 8.1148e-05 | CAMKV      | 0.0148099117227723  | 1           |
| COPD-HTN | ENSG00000143774 | 1  | 12   | 4  | 5E+05 | 8.0757e-05 | GUK1       | 0.0148099117227723  | 1           |
| COPD-HTN | ENSG00000173145 | 10 | 92   | 9  | 5E+05 | 8.0324e-05 | NOC3L      | 0.0148099117227723  | 1           |
| COPD-HTN | ENSG00000157884 | 2  | 128  | 16 | 5E+05 | 7.9515e-05 | CIB4       | 0.0148099117227723  | 1           |
| COPD-HTN | ENSG00000198835 | 1  | 12   | 4  | 5E+05 | 7.1916e-05 | GJC2       | 0.0136662642061856  | 1           |
| COPD-HTN | ENSG00000170291 | 17 | 12   | 3  | 5E+05 | 7.0872e-05 | ELP5       | 0.013608162         | 1           |
| COPD-HTN | ENSG00000067560 | 3  | 79   | 8  | 5E+05 | 6.992e-05  | RHOA       | 0.013566688         | 1           |
| COPD-HTN | ENSG00000164038 | 4  | 72   | 16 | 5E+05 | 6.7226e-05 | SLC9B2     | 0.0131827325319149  | 1           |
| COPD-HTN | ENSG00000176095 | 3  | 82   | 8  | 5E+05 | 6.693e-05  | IP6K1      | 0.0131827325319149  | 1           |
| COPD-HTN | ENSG00000138640 | 4  | 1106 | 43 | 5E+05 | 6.3502e-05 | FAM13A     | 0.0127231778913044  | 1           |
| COPD-HTN | ENSG00000117597 | 1  | 97   | 10 | 5E+05 | 6.3029e-05 | DIEXF      | 0.0127231778913044  | 1           |
| COPD-HTN | ENSG00000164068 | 3  | 44   | 7  | 5E+05 | 6.2126e-05 | RNF123     | 0.0127231778913044  | 1           |
| COPD-HTN | ENSG00000175826 | 17 | 5    | 2  | 5E+05 | 5.8871e-05 | CTDNBP1    | 0.0121929117191011  | 1           |
| COPD-HTN | ENSG00000132612 | 16 | 34   | 7  | 5E+05 | 5.4975e-05 | VPS4A      | 0.0115153883522727  | 1           |
| COPD-HTN | ENSG00000169682 | 16 | 12   | 4  | 5E+05 | 4.8071e-05 | SPNS1      | 0.0101849740574713  | 0.886092743 |
| COPD-HTN | ENSG00000262302 | 17 | 21   | 3  | 5E+05 | 4.5951e-05 | RP1-4G17.5 | 0.00984900910465116 | 0.847014783 |
| COPD-HTN | ENSG00000109332 | 4  | 145  | 7  | 5E+05 | 4.5834e-05 | UBE2D3     | 0.00984900910465116 | 0.844858122 |
| COPD-HTN | ENSG00000188603 | 16 | 28   | 5  | 5E+05 | 4.4883e-05 | CLN3       | 0.00984900910465116 | 0.827328339 |
| COPD-HTN | ENSG00000197165 | 16 | 18   | 4  | 5E+05 | 4.3956e-05 | SULT1A2    | 0.00976193913253012 | 0.810240948 |
| COPD-HTN | ENSG00000181885 | 17 | 6    | 3  | 5E+05 | 4.3049e-05 | CLDN7      | 0.00967710020731707 | 0.793522217 |
| COPD-HTN | ENSG00000164270 | 5  | 467  | 33 | 5E+05 | 3.8994e-05 | HTR4       | 0.00887378274074074 | 0.718776402 |
| COPD-HTN | ENSG00000101204 | 20 | 173  | 31 | 5E+05 | 3.87e-05   | CHRNA4     | 0.00887378274074074 | 0.7133571   |
| COPD-HTN | ENSG00000163798 | 2  | 23   | 8  | 5E+05 | 3.739e-05  | SLC4A1AP   | 0.00872417556962025 | 0.68920987  |

|          |                 |    |     |    |       |            |               |                     |             |
|----------|-----------------|----|-----|----|-------|------------|---------------|---------------------|-------------|
| COPD-HTN | ENSG00000167085 | 17 | 24  | 8  | 5E+05 | 3.5687e-05 | PHB           | 0.00843357014102564 | 0.657818471 |
| COPD-HTN | ENSG00000261832 | 16 | 23  | 4  | 5E+05 | 3.5637e-05 | CLN3          | 0.00843357014102564 | 0.656896821 |
| COPD-HTN | ENSG00000145354 | 4  | 33  | 4  | 5E+05 | 3.1853e-05 | CISD2         | 0.00772560985526316 | 0.587146349 |
| COPD-HTN | ENSG00000173402 | 3  | 97  | 10 | 5E+05 | 3.0442e-05 | DAG1          | 0.00748183181333333 | 0.561137386 |
| COPD-HTN | ENSG00000166822 | 16 | 80  | 10 | 5E+05 | 2.5783e-05 | TMEM170A      | 0.00642240593243243 | 0.475258039 |
| COPD-HTN | ENSG00000198373 | 16 | 422 | 24 | 5E+05 | 2.4949e-05 | WWP2          | 0.00629979338356165 | 0.459884917 |
| COPD-HTN | ENSG00000132604 | 16 | 82  | 14 | 5E+05 | 2.4517e-05 | TERF2         | 0.00627669251388889 | 0.451921861 |
| COPD-HTN | ENSG00000080644 | 15 | 34  | 4  | 5E+05 | 2.3454e-05 | CHRNA3        | 0.00608912087323944 | 0.432327582 |
| COPD-HTN | ENSG00000197183 | 20 | 229 | 22 | 5E+05 | 2.0296e-05 | C20orf112     | 0.00534451668571429 | 0.374116168 |
| COPD-HTN | ENSG00000172818 | 11 | 23  | 6  | 5E+05 | 2.0186e-05 | OVOL1         | 0.00534451668571429 | 0.372088538 |
| COPD-HTN | ENSG00000164037 | 4  | 229 | 8  | 5E+05 | 2.0067e-05 | SLC9B1        | 0.00534451668571429 | 0.369895011 |
| COPD-HTN | ENSG00000109736 | 4  | 7   | 3  | 5E+05 | 1.9112e-05 | MFSD10        | 0.00525808202985075 | 0.352291496 |
| COPD-HTN | ENSG00000169684 | 15 | 34  | 4  | 5E+05 | 1.8066e-05 | CHRNA5        | 0.00504561481818182 | 0.333010578 |
| COPD-HTN | ENSG00000145029 | 3  | 7   | 4  | 5E+05 | 1.7996e-05 | NICN1         | 0.00504561481818182 | 0.331720268 |
| COPD-HTN | ENSG00000145022 | 3  | 6   | 2  | 5E+05 | 1.7376e-05 | TCTA          | 0.005000456         | 0.320291808 |
| COPD-HTN | ENSG00000164062 | 3  | 7   | 2  | 5E+05 | 1.6281e-05 | APEH          | 0.00476361385714286 | 0.300107673 |
| COPD-HTN | ENSG00000101346 | 20 | 33  | 5  | 5E+05 | 1.4273e-05 | POFUT1        | 0.00424345498387097 | 0.263094209 |
| COPD-HTN | ENSG00000205884 | 8  | 4   | 2  | 5E+05 | 1.1426e-05 | DEFB136       | 0.00345271242622951 | 0.210615458 |
| COPD-HTN | ENSG00000205334 | 2  | 13  | 4  | 5E+05 | 1.0814e-05 | AC074091.13   | 0.00332224103333333 | 0.199334462 |
| COPD-HTN | ENSG00000040633 | 17 | 4   | 2  | 5E+05 | 1.0587e-05 | PHF23         | 0.00330763001694915 | 0.195150171 |
| COPD-HTN | ENSG00000260914 | 16 | 33  | 5  | 5E+05 | 8.8901e-06 | RP11-343C2.10 | 0.00282536574655172 | 0.163871213 |
| COPD-HTN | ENSG00000255098 | 8  | 3   | 2  | 5E+05 | 7.9969e-06 | RP11-481A20   | 0.00258608522280702 | 0.147406858 |
| COPD-HTN | ENSG00000104626 | 8  | 400 | 25 | 5E+05 | 7.6454e-06 | ERI1          | 0.002516565         | 0.140927658 |
| COPD-HTN | ENSG00000136770 | 10 | 331 | 16 | 5E+05 | 6.0281e-06 | DNAJC1        | 0.00202029031454545 | 0.111115967 |
| COPD-HTN | ENSG00000204682 | 10 | 7   | 3  | 5E+05 | 6.0167e-06 | CASC10        | 0.00202029031454545 | 0.110905831 |
| COPD-HTN | ENSG00000261717 | 16 | 184 | 11 | 5E+05 | 5.8507e-06 | RP11-77K12.10 | 0.00202029031454545 | 0.107845953 |
| COPD-HTN | ENSG00000138193 | 10 | 552 | 43 | 5E+05 | 5.5829e-06 | PLCE1         | 0.00197903068653846 | 0.102909596 |
| COPD-HTN | ENSG00000181856 | 17 | 6   | 2  | 5E+05 | 5.5329e-06 | SLC2A4        | 0.00197903068653846 | 0.101987946 |
| COPD-HTN | ENSG00000175206 | 1  | 11  | 4  | 5E+05 | 4.89e-06   | NPPA          | 0.001802747         | 0.09013737  |
| COPD-HTN | ENSG00000136574 | 8  | 241 | 34 | 5E+05 | 4.857e-06  | GATA4         | 0.001802747         | 0.089529081 |
| COPD-HTN | ENSG00000126003 | 20 | 10  | 2  | 5E+05 | 4.6185e-06 | PLAGL2        | 0.00177360021875    | 0.085132811 |
| COPD-HTN | ENSG00000233276 | 3  | 2   | 1  | 5E+05 | 4.5515e-06 | GPX1          | 0.00177360021875    | 0.0838978   |
| COPD-HTN | ENSG00000142599 | 1  | 598 | 19 | 5E+05 | 4.4095e-06 | RERE          | 0.00176696333695652 | 0.081280314 |

|          |                 |    |      |     |       |            |             |                      |             |
|----------|-----------------|----|------|-----|-------|------------|-------------|----------------------|-------------|
| COPD-HTN | ENSG00000153774 | 16 | 451  | 15  | 5E+05 | 3.3769e-06 | CFDP1       | 0.0013832532822222   | 0.062246398 |
| COPD-HTN | ENSG00000164061 | 3  | 148  | 13  | 5E+05 | 3.1492e-06 | BSN         | 0.00131930008181818  | 0.058049204 |
| COPD-HTN | ENSG00000075413 | 14 | 254  | 9   | 5E+05 | 2.6178e-06 | MARK3       | 0.00112218389302326  | 0.048253907 |
| COPD-HTN | ENSG00000173273 | 8  | 726  | 17  | 5E+05 | 2.1404e-06 | TNKS        | 0.000939380790476191 | 0.039453993 |
| COPD-HTN | ENSG00000004975 | 17 | 11   | 3   | 5E+05 | 2.093e-06  | DVL2        | 0.000939380790476191 | 0.038580269 |
| COPD-HTN | ENSG00000087269 | 4  | 53   | 8   | 5E+05 | 1.9032e-06 | NOP14       | 0.000877042          | 0.035081686 |
| COPD-HTN | ENSG00000215346 | 8  | 11   | 3   | 5E+05 | 1.8319e-06 | AF131215.5  | 0.000865831094871795 | 0.033767413 |
| COPD-HTN | ENSG00000154342 | 1  | 87   | 10  | 5E+05 | 1.8181e-06 | WNT3A       | 0.000865831094871795 | 0.033513037 |
| COPD-HTN | ENSG00000205882 | 8  | 14   | 4   | 5E+05 | 1.7815e-06 | DEFB134     | 0.000865831094871795 | 0.03283839  |
| COPD-HTN | ENSG00000171303 | 2  | 74   | 11  | 5E+05 | 1.3834e-06 | KCNK3       | 0.000708339227777778 | 0.025500212 |
| COPD-HTN | ENSG00000166166 | 14 | 18   | 3   | 5E+05 | 1.3176e-06 | TRMT61A     | 0.000693923451428571 | 0.024287321 |
| COPD-HTN | ENSG00000173531 | 3  | 6    | 3   | 5E+05 | 1.3125e-06 | MST1        | 0.000693923451428571 | 0.024193313 |
| COPD-HTN | ENSG00000125388 | 4  | 224  | 17  | 5E+05 | 1.2064e-06 | GRK4        | 0.000673865793939394 | 0.022237571 |
| COPD-HTN | ENSG00000136573 | 8  | 241  | 23  | 5E+05 | 8.1673e-07 | BLK         | 0.0004704620028125   | 0.015054784 |
| COPD-HTN | ENSG00000088808 | 14 | 226  | 11  | 5E+05 | 7.7083e-07 | PPP1R13B    | 0.000458345464193548 | 0.014208709 |
| COPD-HTN | ENSG00000254093 | 8  | 404  | 19  | 5E+05 | 5.858e-07  | PINX1       | 0.000359935046666667 | 0.010798051 |
| COPD-HTN | ENSG00000196782 | 4  | 985  | 104 | 5E+05 | 5.507e-07  | MAML3       | 0.000350036313793103 | 0.010151053 |
| COPD-HTN | ENSG00000136379 | 15 | 224  | 25  | 5E+05 | 5.2782e-07 | ABHD17C     | 0.000347475216428571 | 0.009729306 |
| COPD-HTN | ENSG00000147324 | 8  | 431  | 27  | 5E+05 | 4.6574e-07 | MFHAS1      | 0.000317962422962963 | 0.008584985 |
| COPD-HTN | ENSG00000175806 | 8  | 1486 | 61  | 5E+05 | 4.2683e-07 | MSRA        | 0.000302606053461535 | 0.007867757 |
| COPD-HTN | ENSG00000262039 | 17 | 253  | 36  | 5E+05 | 3.8572e-07 | RP11-81K2.1 | 0.0002843990704      | 0.007109977 |
| COPD-HTN | ENSG00000256500 | 14 | 260  | 15  | 5E+05 | 2.7563e-07 | RP11-73M18  | 0.000211695324583333 | 0.005080688 |
| COPD-HTN | ENSG00000087274 | 4  | 124  | 15  | 5E+05 | 1.9819e-07 | ADD1        | 0.000158836359565217 | 0.003653236 |
| COPD-HTN | ENSG00000126214 | 14 | 297  | 16  | 5E+05 | 1.7059e-07 | KLC1        | 0.000142931157727273 | 0.003144485 |
| COPD-HTN | ENSG00000183638 | 8  | 304  | 38  | 5E+05 | 1.4333e-07 | RP1L1       | 0.000125809613809524 | 0.002642002 |
| COPD-HTN | ENSG00000171056 | 8  | 559  | 19  | 5E+05 | 1.2864e-07 | SOX7        | 0.000118561          | 0.002371221 |
| COPD-HTN | ENSG00000134245 | 1  | 147  | 28  | 5E+05 | 1.0906e-07 | WNT2B       | 0.000105805          | 0.002010303 |
| COPD-HTN | ENSG00000177000 | 1  | 78   | 11  | 5E+05 | 1.0144e-07 | MTHFR       | 0.000103880195555556 | 0.001869844 |
| COPD-HTN | ENSG00000258724 | 8  | 553  | 19  | 5E+05 | 9.2425e-08 | SOX7        | 0.000100215883823525 | 0.00170367  |
| COPD-HTN | ENSG00000078403 | 10 | 154  | 23  | 5E+05 | 8.8952e-08 | MLLT10      | 0.000100215883823525 | 0.001639652 |
| COPD-HTN | ENSG00000072682 | 5  | 235  | 21  | 5E+05 | 3.222e-08  | P4HA2       | 3.9594084e-05        | 0.000593911 |
| COPD-HTN | ENSG00000011021 | 1  | 184  | 14  | 5E+05 | 3.1641e-08 | CLCN6       | 3.9594084e-05        | 0.000583239 |
| COPD-HTN | ENSG00000131435 | 5  | 41   | 7   | 5E+05 | 2.8037e-08 | PDLIM4      | 3.9594084e-05        | 0.000516806 |

|          |                 |    |     |    |       |            |            |                      |                 |
|----------|-----------------|----|-----|----|-------|------------|------------|----------------------|-----------------|
| COPD-HTN | ENSG00000100711 | 14 | 40  | 9  | 5E+05 | 2.6904e-08 | ZFYVE21    | 3.9594084e-05        | 0.000495921     |
| COPD-HTN | ENSG00000184608 | 8  | 280 | 23 | 5E+05 | 6.2746e-09 | C8orf12    | 1.05145183454545e-05 | 0.0001156597018 |
| COPD-HTN | ENSG00000197536 | 5  | 179 | 17 | 5E+05 | 3.386e-09  | C5orf56    | 6.2414138e-06        | 6.2414138e-05   |
| COPD-HTN | ENSG00000198740 | 17 | 141 | 12 | 5E+05 | 3.2437e-09 | ZNF652     | 6.2414138e-06        | 5.97911221e-05  |
| COPD-HTN | ENSG00000224997 | 14 | 1   | 1  | 5E+05 | 2.5183e-09 | AL049840.1 | 5.8024779875e-06     | 4.64198239e-05  |
| COPD-HTN | ENSG00000197208 | 5  | 117 | 10 | 5E+05 | 2.3995e-09 | SLC22A4    | 5.8024779875e-06     | 4.42299835e-05  |
| COPD-HTN | ENSG00000256053 | 14 | 94  | 11 | 5E+05 | 2.3609e-09 | APOPT1     | 5.8024779875e-06     | 4.35184697e-05  |
| COPD-HTN | ENSG00000166170 | 14 | 9   | 2  | 5E+05 | 1.445e-09  | BAG5       | 5.327137e-06         | 2.6635685e-05   |
| COPD-HTN | ENSG00000197375 | 5  | 82  | 8  | 5E+05 | 9.5719e-10 | SLC22A5    | 4.4109708175e-06     | 1.764388327e-05 |
| COPD-HTN | ENSG00000171044 | 8  | 969 | 32 | 5E+05 | 5.0901e-10 | XKR6       | 3.12752711e-06       | 9.38258133e-06  |
| COPD-HTN | ENSG00000126215 | 14 | 27  | 6  | 5E+05 | 2.5895e-10 | XRCC3      | 2.386612675e-06      | 4.77322535e-06  |
| COPD-HTN | ENSG00000127663 | 19 | 518 | 32 | 5E+05 | 1.6228e-10 | KDM4B      | 2.386612675e-06      | 2.99130724e-06  |

---

**Table S2. MAGMA gene enrichment: significantly enriched genes associated with COPD and cardiovascular diseases (P<sub>fd</sub><0.05)**

| Trait pair | GENE            | CHR | START    | STOP      | NSNPS | NPARAM | N     | P          | SYMBOL    | P <sub>fd</sub> | P <sub>bon</sub> |
|------------|-----------------|-----|----------|-----------|-------|--------|-------|------------|-----------|-----------------|------------------|
| COPD-HTN   | ENSG00000205334 | 2   | 27928653 | 27938599  | 13    | 4      | 5E+05 | 1.0814e-05 | AC074091  | 0.003322241033  | 0.199334462      |
| COPD-HTN   | ENSG00000040633 | 17  | 7138347  | 7143041   | 4     | 2      | 5E+05 | 1.0587e-05 | PHF23     | 0.003307630016  | 0.195150171      |
| COPD-HTN   | ENSG00000260914 | 16  | 69333585 | 69354614  | 33    | 5      | 5E+05 | 8.8901e-06 | RP11-343C | 0.002825365746  | 0.163871213      |
| COPD-HTN   | ENSG00000255098 | 8   | 11870545 | 11873043  | 3     | 2      | 5E+05 | 7.9969e-06 | RP11-481A | 0.002586085222  | 0.147406858      |
| COPD-HTN   | ENSG00000104626 | 8   | 8859657  | 8974256   | 400   | 25     | 5E+05 | 7.6454e-06 | ERI1      | 0.002516565     | 0.140927658      |
| COPD-HTN   | ENSG00000136770 | 10  | 22045466 | 22292698  | 331   | 16     | 5E+05 | 6.0281e-06 | DNAJC1    | 0.002020290314  | 0.111115967      |
| COPD-HTN   | ENSG00000204682 | 10  | 21781587 | 21786191  | 7     | 3      | 5E+05 | 6.0167e-06 | CASC10    | 0.002020290314  | 0.110905831      |
| COPD-HTN   | ENSG00000261717 | 16  | 75446582 | 75498604  | 184   | 11     | 5E+05 | 5.8507e-06 | RP11-77K1 | 0.002020290314  | 0.107845953      |
| COPD-HTN   | ENSG00000138193 | 10  | 95753746 | 96092580  | 552   | 43     | 5E+05 | 5.5829e-06 | PLCE1     | 0.001979030686  | 0.102909596      |
| COPD-HTN   | ENSG00000181856 | 17  | 7184986  | 7191576   | 6     | 2      | 5E+05 | 5.5329e-06 | SLC2A4    | 0.001979030686  | 0.101987946      |
| COPD-HTN   | ENSG00000175206 | 1   | 11905766 | 11908402  | 11    | 4      | 5E+05 | 4.89e-06   | NPPA      | 0.001802747     | 0.09013737       |
| COPD-HTN   | ENSG00000136574 | 8   | 11534468 | 11617511  | 241   | 34     | 5E+05 | 4.857e-06  | GATA4     | 0.001802747     | 0.089529081      |
| COPD-HTN   | ENSG00000126003 | 20  | 30780306 | 30795594  | 10    | 2      | 5E+05 | 4.6185e-06 | PLAGL2    | 0.001773600218  | 0.085132811      |
| COPD-HTN   | ENSG00000233276 | 3   | 49394609 | 49396033  | 2     | 1      | 5E+05 | 4.5515e-06 | GPX1      | 0.001773600218  | 0.0838978        |
| COPD-HTN   | ENSG00000142599 | 1   | 8412457  | 8877702   | 598   | 19     | 5E+05 | 4.4095e-06 | RERE      | 0.001766963336  | 0.081280314      |
| COPD-HTN   | ENSG00000153774 | 16  | 75327596 | 75467383  | 451   | 15     | 5E+05 | 3.3769e-06 | CFDP1     | 0.001383253282  | 0.062246398      |
| COPD-HTN   | ENSG00000164061 | 3   | 49591922 | 49708978  | 148   | 13     | 5E+05 | 3.1492e-06 | BSN       | 0.001319300081  | 0.058049204      |
| COPD-HTN   | ENSG00000075413 | 14  | 1.04E+08 | 103970168 | 254   | 9      | 5E+05 | 2.6178e-06 | MARK3     | 0.001122183893  | 0.048253907      |
| COPD-HTN   | ENSG00000173273 | 8   | 9413424  | 9639856   | 726   | 17     | 5E+05 | 2.1404e-06 | TNKS      | 0.000939380790  | 0.039453993      |
| COPD-HTN   | ENSG00000004975 | 17  | 7128660  | 7137864   | 11    | 3      | 5E+05 | 2.093e-06  | DVL2      | 0.000939380790  | 0.038580269      |
| COPD-HTN   | ENSG00000087269 | 4   | 2939660  | 2965112   | 53    | 8      | 5E+05 | 1.9032e-06 | NOP14     | 0.000877042     | 0.035081686      |
| COPD-HTN   | ENSG00000215346 | 8   | 10983980 | 10987745  | 11    | 3      | 5E+05 | 1.8319e-06 | AF131215  | 0.000865831094  | 0.033767413      |
| COPD-HTN   | ENSG00000154342 | 1   | 2.28E+08 | 228248961 | 87    | 10     | 5E+05 | 1.8181e-06 | WNT3A     | 0.000865831094  | 0.033513037      |
| COPD-HTN   | ENSG00000205882 | 8   | 11850692 | 11853821  | 14    | 4      | 5E+05 | 1.7815e-06 | DEFB134   | 0.000865831094  | 0.03283839       |
| COPD-HTN   | ENSG00000171303 | 2   | 26915619 | 26956288  | 74    | 11     | 5E+05 | 1.3834e-06 | KCNK3     | 0.000708339227  | 0.025500212      |
| COPD-HTN   | ENSG00000166166 | 14  | 1.04E+08 | 104003410 | 18    | 3      | 5E+05 | 1.3176e-06 | TRMT61A   | 0.000693923451  | 0.024287321      |
| COPD-HTN   | ENSG00000173531 | 3   | 49721380 | 49726934  | 6     | 3      | 5E+05 | 1.3125e-06 | MST1      | 0.000693923451  | 0.024193313      |
| COPD-HTN   | ENSG00000125388 | 4   | 2965335  | 3042474   | 224   | 17     | 5E+05 | 1.2064e-06 | GRK4      | 0.000673865793  | 0.022237571      |

|          |                 |    |          |           |      |     |       |            |            |                  |                 |
|----------|-----------------|----|----------|-----------|------|-----|-------|------------|------------|------------------|-----------------|
| COPD-HTN | ENSG00000136573 | 8  | 11351510 | 11422113  | 241  | 23  | 5E+05 | 8.1673e-07 | BLK        | 0.000470462002   | 0.015054784     |
| COPD-HTN | ENSG00000088808 | 14 | 1.04E+08 | 104313927 | 226  | 11  | 5E+05 | 7.7083e-07 | PPP1R13B   | 0.000458345464   | 0.014208709     |
| COPD-HTN | ENSG00000254093 | 8  | 10622473 | 10697394  | 404  | 19  | 5E+05 | 5.858e-07  | PINX1      | 0.000359935046   | 0.010798051     |
| COPD-HTN | ENSG00000196782 | 4  | 1.41E+08 | 141075338 | 985  | 104 | 5E+05 | 5.507e-07  | MAML3      | 0.000350036313   | 0.010151053     |
| COPD-HTN | ENSG00000136379 | 15 | 80972025 | 81047962  | 224  | 25  | 5E+05 | 5.2782e-07 | ABHD17C    | 0.000347475216   | 0.009729306     |
| COPD-HTN | ENSG00000147324 | 8  | 8640864  | 8751155   | 431  | 27  | 5E+05 | 4.6574e-07 | MFHAS1     | 0.000317962422   | 0.008584985     |
| COPD-HTN | ENSG00000175806 | 8  | 9911778  | 10286401  | 1486 | 61  | 5E+05 | 4.2683e-07 | MSRA       | 0.000302606053   | 0.007867757     |
| COPD-HTN | ENSG00000262039 | 17 | 47448102 | 47554350  | 253  | 36  | 5E+05 | 3.8572e-07 | RP11-81K20 | 0.000284399070   | 0.007109977     |
| COPD-HTN | ENSG00000256500 | 14 | 1.04E+08 | 104152261 | 260  | 15  | 5E+05 | 2.7563e-07 | RP11-73M10 | 0.000211695324   | 0.005080688     |
| COPD-HTN | ENSG00000087274 | 4  | 2845584  | 2931803   | 124  | 15  | 5E+05 | 1.9819e-07 | ADD1       | 0.000158836359   | 0.003653236     |
| COPD-HTN | ENSG00000126214 | 14 | 1.04E+08 | 104167888 | 297  | 16  | 5E+05 | 1.7059e-07 | KLC1       | 0.000142931157   | 0.003144485     |
| COPD-HTN | ENSG00000183638 | 8  | 10463859 | 10569697  | 304  | 38  | 5E+05 | 1.4333e-07 | RP1L1      | 0.000125809613   | 0.002642002     |
| COPD-HTN | ENSG00000171056 | 8  | 10581278 | 10697357  | 559  | 19  | 5E+05 | 1.2864e-07 | SOX7       | 0.000118561      | 0.002371221     |
| COPD-HTN | ENSG00000134245 | 1  | 1.13E+08 | 113072787 | 147  | 28  | 5E+05 | 1.0906e-07 | WNT2B      | 0.000105805      | 0.002010303     |
| COPD-HTN | ENSG00000177000 | 1  | 11845780 | 11866977  | 78   | 11  | 5E+05 | 1.0144e-07 | MTHFR      | 0.000103880195   | 0.001869844     |
| COPD-HTN | ENSG00000258724 | 8  | 10582909 | 10697357  | 553  | 19  | 5E+05 | 9.2425e-08 | SOX7       | 0.000100215883   | 0.00170367      |
| COPD-HTN | ENSG00000078403 | 10 | 21823094 | 22032559  | 154  | 23  | 5E+05 | 8.8952e-08 | MLLT10     | 0.000100215883   | 0.001639652     |
| COPD-HTN | ENSG00000072682 | 5  | 1.32E+08 | 131631008 | 235  | 21  | 5E+05 | 3.222e-08  | P4HA2      | 3.9594084e-05    | 0.000593911     |
| COPD-HTN | ENSG00000011021 | 1  | 11866207 | 11903201  | 184  | 14  | 5E+05 | 3.1641e-08 | CLCN6      | 3.9594084e-05    | 0.000583239     |
| COPD-HTN | ENSG00000131435 | 5  | 1.32E+08 | 131609147 | 41   | 7   | 5E+05 | 2.8037e-08 | PDLIM4     | 3.9594084e-05    | 0.000516806     |
| COPD-HTN | ENSG00000100711 | 14 | 1.04E+08 | 104200005 | 40   | 9   | 5E+05 | 2.6904e-08 | ZFYVE21    | 3.9594084e-05    | 0.000495921     |
| COPD-HTN | ENSG00000184608 | 8  | 11225911 | 11296167  | 280  | 23  | 5E+05 | 6.2746e-09 | C8orf12    | 1.0514518345450  | 0.0001156597018 |
| COPD-HTN | ENSG00000197536 | 5  | 1.32E+08 | 131811736 | 179  | 17  | 5E+05 | 3.386e-09  | C5orf56    | 6.2414138e-06    | 6.2414138e-05   |
| COPD-HTN | ENSG00000198740 | 17 | 47366568 | 47439835  | 141  | 12  | 5E+05 | 3.2437e-09 | ZNF652     | 6.2414138e-06    | 5.97911221e-05  |
| COPD-HTN | ENSG00000224997 | 14 | 1.04E+08 | 104179149 | 1    | 1   | 5E+05 | 2.5183e-09 | AL049840   | 5.8024779875e-14 | 6.4198239e-05   |
| COPD-HTN | ENSG00000197208 | 5  | 1.32E+08 | 131679899 | 117  | 10  | 5E+05 | 2.3995e-09 | SLC22A4    | 5.8024779875e-14 | 4.2299835e-05   |
| COPD-HTN | ENSG00000256053 | 14 | 1.04E+08 | 104073860 | 94   | 11  | 5E+05 | 2.3609e-09 | APOPT1     | 5.8024779875e-14 | 3.5184697e-05   |
| COPD-HTN | ENSG00000166170 | 14 | 1.04E+08 | 104029168 | 9    | 2   | 5E+05 | 1.445e-09  | BAG5       | 5.327137e-06     | 2.6635685e-05   |
| COPD-HTN | ENSG00000197375 | 5  | 1.32E+08 | 131731306 | 82   | 8   | 5E+05 | 9.5719e-10 | SLC22A5    | 4.4109708175e-11 | 7.64388327e-05  |
| COPD-HTN | ENSG00000171044 | 8  | 10753555 | 11058875  | 969  | 32  | 5E+05 | 5.0901e-10 | XKR6       | 3.12752711e-06   | 9.38258133e-06  |

|          |                 |    |          |           |     |    |       |            |           |                 |                |
|----------|-----------------|----|----------|-----------|-----|----|-------|------------|-----------|-----------------|----------------|
| COPD-HTN | ENSG00000126215 | 14 | 1.04E+08 | 104181841 | 27  | 6  | 5E+05 | 2.5895e-10 | XRCC3     | 2.386612675e-04 | 4.77322535e-06 |
| COPD-HTN | ENSG00000127663 | 19 | 4969125  | 5153606   | 518 | 32 | 5E+05 | 1.6228e-10 | KDM4B     | 2.386612675e-04 | 2.99130724e-06 |
| COPD-CHD | ENSG00000120693 | 13 | 37418968 | 37494902  | 176 | 23 | 4E+05 | 0.00010255 | SMAD9     | 0.04625005      | 1              |
| COPD-CHD | ENSG00000272617 | 16 | 69362547 | 69368774  | 13  | 4  | 4E+05 | 0.00010172 | RP11-343C | 0.04625005      | 1              |
| COPD-CHD | ENSG00000166822 | 16 | 75476952 | 75499395  | 92  | 9  | 4E+05 | 9.9684e-05 | TMEM170   | 0.04625005      | 1              |
| COPD-CHD | ENSG00000213380 | 16 | 69354043 | 69373570  | 47  | 7  | 4E+05 | 9.1154e-05 | COG8      | 0.044356016157  | 1              |
| COPD-CHD | ENSG00000132604 | 16 | 69389464 | 69442474  | 84  | 14 | 4E+05 | 8.8066e-05 | TERF2     | 0.044011578540  | 1              |
| COPD-CHD | ENSG00000197375 | 5  | 1.32E+08 | 131731306 | 84  | 8  | 4E+05 | 8.4584e-05 | SLC22A5   | 0.043445631777  | 1              |
| COPD-CHD | ENSG00000146477 | 6  | 1.61E+08 | 160876014 | 214 | 16 | 4E+05 | 8.3719e-05 | SLC22A3   | 0.043445631777  | 1              |
| COPD-CHD | ENSG00000138663 | 4  | 83955600 | 83996971  | 49  | 9  | 4E+05 | 7.8234e-05 | COPS4     | 0.042547791     | 1              |
| COPD-CHD | ENSG00000117400 | 1  | 43803478 | 43818443  | 13  | 3  | 4E+05 | 7.0475e-05 | MPL       | 0.039489491666  | 1              |
| COPD-CHD | ENSG00000261717 | 16 | 75446582 | 75498604  | 204 | 11 | 4E+05 | 6.9525e-05 | RP11-77K1 | 0.039489491666  | 1              |
| COPD-CHD | ENSG00000066056 | 1  | 43766664 | 43788779  | 31  | 4  | 4E+05 | 6.3897e-05 | TIE1      | 0.038113529903  | 1              |
| COPD-CHD | ENSG00000167081 | 9  | 1.29E+08 | 128729656 | 247 | 17 | 4E+05 | 5.5589e-05 | PBX3      | 0.034263206633  | 1              |
| COPD-CHD | ENSG00000132603 | 16 | 69373333 | 69377014  | 14  | 5  | 4E+05 | 4.3668e-05 | NIP7      | 0.027843620275  | 0.807464988    |
| COPD-CHD | ENSG00000259900 | 16 | 69369179 | 69385633  | 36  | 8  | 4E+05 | 3.0813e-05 | RP11-343C | 0.020348685107  | 0.569763183    |
| COPD-CHD | ENSG00000204775 | 8  | 1.45E+08 | 145331153 | 1   | 1  | 4E+05 | 3.0266e-05 | KM-PA-2   | 0.020348685107  | 0.559648606    |
| COPD-CHD | ENSG00000058335 | 15 | 79252289 | 79383115  | 337 | 51 | 4E+05 | 2.9696e-05 | RASGRF1   | 0.020348685107  | 0.549108736    |
| COPD-CHD | ENSG00000256053 | 14 | 1.04E+08 | 104073860 | 108 | 11 | 4E+05 | 2.7492e-05 | APOPT1    | 0.020334183     | 0.508354572    |
| COPD-CHD | ENSG00000260371 | 16 | 69368994 | 69390209  | 39  | 10 | 4E+05 | 2.5834e-05 | RP11-343C | 0.019904020583  | 0.477696494    |
| COPD-CHD | ENSG00000157315 | 16 | 69377151 | 69385712  | 19  | 7  | 4E+05 | 2.4691e-05 | TMED6     | 0.019850490478  | 0.456561281    |
| COPD-CHD | ENSG00000262039 | 17 | 47448102 | 47554350  | 253 | 36 | 4E+05 | 2.1939e-05 | RP11-81K2 | 0.01843973      | 0.405674049    |
| COPD-CHD | ENSG00000189308 | 4  | 83831126 | 83934079  | 209 | 9  | 4E+05 | 2.1573e-05 | LIN54     | 0.01843973      | 0.398906343    |
| COPD-CHD | ENSG00000169684 | 15 | 78857862 | 78887611  | 37  | 5  | 4E+05 | 2.0476e-05 | CHRNA5    | 0.01843973      | 0.378621716    |
| COPD-CHD | ENSG00000197536 | 5  | 1.32E+08 | 131811736 | 185 | 18 | 4E+05 | 1.44e-05   | C5orf56   | 0.014014231578  | 0.2662704      |
| COPD-CHD | ENSG00000080644 | 15 | 78885394 | 78913637  | 44  | 4  | 4E+05 | 1.3801e-05 | CHRNA3    | 0.014014231578  | 0.255194291    |
| COPD-CHD | ENSG00000168152 | 4  | 83821837 | 83841122  | 37  | 4  | 4E+05 | 1.3254e-05 | THAP9     | 0.014014231578  | 0.245079714    |
| COPD-CHD | ENSG00000168802 | 16 | 69151913 | 69166487  | 29  | 10 | 4E+05 | 9.4108e-06 | CHTF8     | 0.010875944     | 0.174015103    |
| COPD-CHD | ENSG00000136378 | 15 | 79051545 | 79103773  | 104 | 15 | 4E+05 | 7.8011e-06 | ADAMTS7   | 0.009616676006  | 0.14425014     |
| COPD-CHD | ENSG00000166170 | 14 | 1.04E+08 | 104029168 | 10  | 2  | 4E+05 | 6.6018e-06 | BAG5      | 0.008719563128  | 0.122073884    |

|          |                 |    |          |           |     |    |       |            |           |                 |                 |
|----------|-----------------|----|----------|-----------|-----|----|-------|------------|-----------|-----------------|-----------------|
| COPD-CHD | ENSG00000101204 | 20 | 61975420 | 62009753  | 188 | 33 | 4E+05 | 2.5133e-06 | CHRNA4    | 0.003574879253  | 0.04647343      |
| COPD-CHD | ENSG00000130208 | 19 | 45417504 | 45422606  | 12  | 5  | 4E+05 | 2.2231e-06 | APOC1     | 0.003425611841  | 0.041107342     |
| COPD-CHD | ENSG00000168807 | 16 | 69221032 | 69342955  | 229 | 21 | 4E+05 | 1.5852e-06 | SNTB2     | 0.002664721     | 0.029311933     |
| COPD-CHD | ENSG00000132612 | 16 | 69345259 | 69358949  | 37  | 7  | 4E+05 | 1.5684e-06 | VPS4A     | 0.002664721     | 0.029001284     |
| COPD-CHD | ENSG00000141076 | 16 | 69165194 | 69265033  | 172 | 21 | 4E+05 | 1.3979e-06 | CIRH1A    | 0.002664721     | 0.025848569     |
| COPD-CHD | ENSG00000130204 | 19 | 45393826 | 45406946  | 50  | 10 | 4E+05 | 1.0888e-06 | TOMM40    | 0.002516625     | 0.020133001     |
| COPD-CHD | ENSG00000260914 | 16 | 69333585 | 69354614  | 39  | 6  | 4E+05 | 8.4901e-07 | RP11-343C | 0.002242720558  | 0.015699044     |
| COPD-CHD | ENSG00000168487 | 8  | 22022249 | 22069839  | 140 | 20 | 4E+05 | 2.3328e-07 | BMP1      | 0.00071893      | 0.00431358      |
| COPD-CHD | ENSG00000117971 | 15 | 78916461 | 79020096  | 174 | 20 | 4E+05 | 4.4206e-08 | CHRN4     | 0.000163482629  | 0.000817413     |
| COPD-CHD | ENSG00000198740 | 17 | 47366568 | 47439835  | 154 | 13 | 4E+05 | 4.3905e-08 | ZNF652    | 0.000163482629  | 0.000811847     |
| COPD-CHD | ENSG00000130203 | 19 | 45409011 | 45412650  | 5   | 2  | 4E+05 | 6.985e-09  | APOE      | 4.305321166666  | 0.00012916      |
| COPD-CHD | ENSG00000136381 | 15 | 78729773 | 78793798  | 63  | 10 | 4E+05 | 5.9374e-09 | IREB2     | 4.305321166666  | 0.0001097884634 |
| COPD-CHD | ENSG00000185787 | 15 | 79102829 | 79190475  | 343 | 16 | 4E+05 | 9.3726e-10 | MORF4L1   | 1.733087466e-0: | 1.733087466e-05 |
| COPD-HF  | ENSG00000148842 | 10 | 1.05E+08 | 104849978 | 368 | 18 | 5E+05 | 0.00046144 | CNNM2     | 0.048327974545  | 1               |
| COPD-HF  | ENSG00000187492 | 3  | 49828165 | 49837268  | 14  | 5  | 5E+05 | 0.00045332 | CDHR4     | 0.047748843     | 1               |
| COPD-HF  | ENSG00000102882 | 16 | 30125426 | 30134827  | 11  | 4  | 5E+05 | 0.00044361 | MAPK3     | 0.046994615689  | 1               |
| COPD-HF  | ENSG00000136709 | 2  | 1.28E+08 | 128568761 | 228 | 25 | 5E+05 | 0.00042694 | WDR33     | 0.045490086820  | 1               |
| COPD-HF  | ENSG00000157388 | 3  | 53528683 | 53847760  | 689 | 67 | 5E+05 | 0.00041706 | CACNA1D   | 0.044695738255  | 1               |
| COPD-HF  | ENSG00000115526 | 2  | 1.01E+08 | 101034118 | 41  | 6  | 5E+05 | 0.00041375 | CHST10    | 0.044600314327  | 1               |
| COPD-HF  | ENSG00000136378 | 15 | 79051545 | 79103773  | 76  | 13 | 5E+05 | 0.00041155 | ADAMTS7   | 0.044600314327  | 1               |
| COPD-HF  | ENSG00000138785 | 4  | 1.07E+08 | 106817143 | 427 | 13 | 5E+05 | 0.00040349 | INTS12    | 0.044009060177  | 1               |
| COPD-HF  | ENSG00000101336 | 20 | 30639991 | 30689659  | 74  | 9  | 5E+05 | 0.00040333 | HCK       | 0.044009060177  | 1               |
| COPD-HF  | ENSG00000258366 | 20 | 62289163 | 62328416  | 159 | 18 | 5E+05 | 0.00039797 | RTEL1     | 0.043926832395  | 1               |
| COPD-HF  | ENSG00000164078 | 3  | 49924435 | 49941299  | 20  | 4  | 5E+05 | 0.0003937  | MST1R     | 0.043717301807  | 1               |
| COPD-HF  | ENSG00000061455 | 5  | 1.22E+08 | 122529960 | 344 | 25 | 5E+05 | 0.00039124 | PRDM6     | 0.043707435878  | 1               |
| COPD-HF  | ENSG00000168152 | 4  | 83821837 | 83841122  | 33  | 4  | 5E+05 | 0.00038107 | THAP9     | 0.042830873841  | 1               |
| COPD-HF  | ENSG00000138780 | 4  | 1.07E+08 | 106768885 | 300 | 11 | 5E+05 | 0.00038064 | GSTCD     | 0.042830873841  | 1               |
| COPD-HF  | ENSG00000178201 | 19 | 57966542 | 57967854  | 2   | 1  | 5E+05 | 0.0003804  | VN1R1     | 0.042830873841  | 1               |
| COPD-HF  | ENSG00000273047 | 20 | 62369623 | 62371751  | 5   | 2  | 5E+05 | 0.00037196 | RP4-583P1 | 0.042585954534  | 1               |
| COPD-HF  | ENSG00000167397 | 16 | 31102163 | 31107301  | 7   | 3  | 5E+05 | 0.00035516 | VKORC1    | 0.040916652     | 1               |

|         |                 |    |          |           |      |     |       |            |           |                |   |
|---------|-----------------|----|----------|-----------|------|-----|-------|------------|-----------|----------------|---|
| COPD-HF | ENSG00000153975 | 6  | 1.17E+08 | 116989957 | 68   | 9   | 5E+05 | 0.00035359 | ZUFSP     | 0.040916652    | 1 |
| COPD-HF | ENSG00000103507 | 16 | 31117428 | 31124110  | 6    | 2   | 5E+05 | 0.000327   | BCKDK     | 0.038149310126 | 1 |
| COPD-HF | ENSG00000066056 | 1  | 43766664 | 43788779  | 26   | 3   | 5E+05 | 0.00032382 | TIE1      | 0.038018943057 | 1 |
| COPD-HF | ENSG00000111832 | 6  | 1.17E+08 | 116918838 | 57   | 9   | 5E+05 | 0.00031962 | RWDD1     | 0.037766381153 | 1 |
| COPD-HF | ENSG00000026036 | 20 | 62290653 | 62330037  | 164  | 19  | 5E+05 | 0.00031797 | RTEL1-TN  | 0.037766381153 | 1 |
| COPD-HF | ENSG00000197479 | 5  | 1.41E+08 | 140582618 | 6    | 2   | 5E+05 | 0.00030862 | PCDHB11   | 0.036940210779 | 1 |
| COPD-HF | ENSG00000165995 | 10 | 18429606 | 18830798  | 1367 | 101 | 5E+05 | 0.00030827 | CACNB2    | 0.036940210779 | 1 |
| COPD-HF | ENSG00000168769 | 4  | 1.06E+08 | 106200973 | 233  | 28  | 5E+05 | 0.0003004  | TET2      | 0.036429428947 | 1 |
| COPD-HF | ENSG00000079385 | 19 | 43011456 | 43065386  | 41   | 6   | 5E+05 | 0.00029983 | CEACAM1   | 0.036429428947 | 1 |
| COPD-HF | ENSG00000177302 | 17 | 18174742 | 18218321  | 77   | 8   | 5E+05 | 0.00029881 | TOP3A     | 0.036429428947 | 1 |
| COPD-HF | ENSG00000196502 | 16 | 28616903 | 28634946  | 47   | 5   | 5E+05 | 0.00029601 | SULT1A1   | 0.036429428947 | 1 |
| COPD-HF | ENSG00000153815 | 16 | 81478775 | 81745367  | 1031 | 94  | 5E+05 | 0.0002915  | CMIP      | 0.036305537162 | 1 |
| COPD-HF | ENSG00000181873 | 1  | 2.28E+08 | 228369958 | 16   | 4   | 5E+05 | 0.00029068 | IBA57     | 0.036305537162 | 1 |
| COPD-HF | ENSG00000076685 | 10 | 1.05E+08 | 104953056 | 218  | 16  | 5E+05 | 0.00028158 | NT5C2     | 0.035550439315 | 1 |
| COPD-HF | ENSG00000143761 | 1  | 2.28E+08 | 228286912 | 25   | 6   | 5E+05 | 0.00027912 | ARF1      | 0.035482889379 | 1 |
| COPD-HF | ENSG00000203896 | 20 | 62366815 | 62370456  | 8    | 2   | 5E+05 | 0.00027201 | LIME1     | 0.034819168958 | 1 |
| COPD-HF | ENSG00000170606 | 5  | 1.32E+08 | 132442141 | 92   | 6   | 5E+05 | 0.00027172 | HSPA4     | 0.034819168958 | 1 |
| COPD-HF | ENSG00000175029 | 10 | 1.27E+08 | 126849739 | 639  | 60  | 5E+05 | 0.00027095 | CTBP2     | 0.034819168958 | 1 |
| COPD-HF | ENSG00000176994 | 17 | 18218624 | 18226517  | 33   | 5   | 5E+05 | 0.00027088 | SMCR8     | 0.034819168958 | 1 |
| COPD-HF | ENSG00000272617 | 16 | 69362547 | 69368774  | 12   | 3   | 5E+05 | 0.00026195 | RP11-343C | 0.034489459642 | 1 |
| COPD-HF | ENSG00000120324 | 5  | 1.41E+08 | 140575215 | 4    | 2   | 5E+05 | 0.00025932 | PCDHB10   | 0.034388816978 | 1 |
| COPD-HF | ENSG00000180592 | 10 | 21802407 | 21814611  | 7    | 2   | 5E+05 | 0.0002571  | SKIDA1    | 0.034341480434 | 1 |
| COPD-HF | ENSG00000169783 | 15 | 77905369 | 78113242  | 576  | 34  | 5E+05 | 0.00025323 | LINGO1    | 0.034071449562 | 1 |
| COPD-HF | ENSG00000198700 | 1  | 2.02E+08 | 201853422 | 82   | 13  | 5E+05 | 0.00025308 | IPO9      | 0.034071449562 | 1 |
| COPD-HF | ENSG00000111249 | 12 | 1.11E+08 | 111788358 | 334  | 27  | 5E+05 | 0.00024784 | CUX2      | 0.033840257185 | 1 |
| COPD-HF | ENSG00000154319 | 8  | 11278972 | 11332224  | 253  | 20  | 5E+05 | 0.00024617 | FAM167A   | 0.033840257185 | 1 |
| COPD-HF | ENSG00000186998 | 22 | 29601840 | 29655586  | 171  | 27  | 5E+05 | 0.00023362 | EMID1     | 0.032378326766 | 1 |
| COPD-HF | ENSG00000255524 | 16 | 28648975 | 28670003  | 3    | 2   | 5E+05 | 0.00023338 | NPIP8     | 0.032378326766 | 1 |
| COPD-HF | ENSG00000178149 | 3  | 49052921 | 49059726  | 4    | 2   | 5E+05 | 0.00021422 | DALRD3    | 0.030142879847 | 1 |
| COPD-HF | ENSG00000101246 | 20 | 62329996 | 62339377  | 14   | 2   | 5E+05 | 0.0002139  | ARFRP1    | 0.030142879847 | 1 |

|         |                 |    |          |           |     |    |       |            |         |                |   |
|---------|-----------------|----|----------|-----------|-----|----|-------|------------|---------|----------------|---|
| COPD-HF | ENSG00000166165 | 14 | 1.04E+08 | 103989448 | 5   | 2  | 5E+05 | 0.00021118 | CKB     | 0.030142879847 | 1 |
| COPD-HF | ENSG00000117971 | 15 | 78916461 | 79020096  | 153 | 20 | 5E+05 | 0.00020642 | CHRN4   | 0.029726092656 | 1 |
| COPD-HF | ENSG00000198198 | 1  | 43855553 | 43918321  | 83  | 7  | 5E+05 | 0.00019829 | SZT2    | 0.028780154094 | 1 |
| COPD-HF | ENSG00000156931 | 3  | 1.85E+08 | 184770402 | 413 | 22 | 5E+05 | 0.00019738 | VPS8    | 0.028780154094 | 1 |
| COPD-HF | ENSG00000177710 | 8  | 11188397 | 11189717  | 8   | 2  | 5E+05 | 0.00018888 | SLC35G5 | 0.027853       | 1 |
| COPD-HF | ENSG00000205089 | 5  | 1.32E+08 | 132089856 | 6   | 2  | 5E+05 | 0.00018524 | CCNI2   | 0.027536523548 | 1 |
| COPD-HF | ENSG00000145020 | 3  | 49454211 | 49460186  | 8   | 2  | 5E+05 | 0.00017004 | AMT     | 0.025482498536 | 1 |
| COPD-HF | ENSG00000187555 | 16 | 8985951  | 9058371   | 178 | 17 | 5E+05 | 0.00016602 | USP7    | 0.025083989016 | 1 |
| COPD-HF | ENSG00000103510 | 16 | 31127075 | 31142714  | 22  | 4  | 5E+05 | 0.0001469  | KAT8    | 0.022378576033 | 1 |
| COPD-HF | ENSG00000117400 | 1  | 43803478 | 43818443  | 13  | 3  | 5E+05 | 0.00014553 | MPL     | 0.022354621    | 1 |
| COPD-HF | ENSG00000178952 | 16 | 28853732 | 28857729  | 7   | 2  | 5E+05 | 0.0001428  | TUFM    | 0.0221196      | 1 |
| COPD-HF | ENSG00000183763 | 3  | 49866034 | 49894007  | 35  | 5  | 5E+05 | 0.00014262 | TRAIP   | 0.0221196      | 1 |
| COPD-HF | ENSG00000143816 | 1  | 2.28E+08 | 228135599 | 79  | 9  | 5E+05 | 0.00013716 | WNT9A   | 0.021609147692 | 1 |
| COPD-HF | ENSG00000196296 | 16 | 28889726 | 28915830  | 24  | 4  | 5E+05 | 0.00013661 | ATP2A1  | 0.021609147692 | 1 |
| COPD-HF | ENSG00000178188 | 16 | 28857921 | 28885526  | 41  | 3  | 5E+05 | 0.00012548 | SH2B1   | 0.020112807304 | 1 |
| COPD-HF | ENSG00000132535 | 17 | 7093209  | 7123021   | 36  | 7  | 5E+05 | 0.0001226  | DLG4    | 0.019823559649 | 1 |
| COPD-HF | ENSG00000213658 | 16 | 28996147 | 29002104  | 6   | 3  | 5E+05 | 0.00011765 | LAT     | 0.019191526106 | 1 |
| COPD-HF | ENSG00000168488 | 16 | 28834356 | 28848558  | 26  | 2  | 5E+05 | 0.00011531 | ATXN2L  | 0.018977760982 | 1 |
| COPD-HF | ENSG00000108342 | 17 | 38171614 | 38174066  | 11  | 3  | 5E+05 | 0.00011432 | CSF3    | 0.018977760982 | 1 |
| COPD-HF | ENSG00000104643 | 8  | 11141925 | 11185646  | 102 | 8  | 5E+05 | 0.0001128  | MTMR9   | 0.018902203636 | 1 |
| COPD-HF | ENSG00000184730 | 16 | 28505970 | 28510291  | 11  | 3  | 5E+05 | 0.00011173 | APOBR   | 0.018894670550 | 1 |
| COPD-HF | ENSG00000170500 | 2  | 1.01E+08 | 100939195 | 160 | 9  | 5E+05 | 0.0001087  | LONRF2  | 0.018552473148 | 1 |
| COPD-HF | ENSG00000236699 | 4  | 1.06E+08 | 106629250 | 374 | 31 | 5E+05 | 0.00010773 | ARHGEF3 | 0.018552473148 | 1 |
| COPD-HF | ENSG00000168807 | 16 | 69221032 | 69342955  | 220 | 21 | 5E+05 | 0.00010624 | SNTB2   | 0.018474735094 | 1 |
| COPD-HF | ENSG00000125347 | 5  | 1.32E+08 | 131826490 | 36  | 2  | 5E+05 | 0.0001052  | IRF1    | 0.018468110476 | 1 |
| COPD-HF | ENSG00000177548 | 16 | 28915742 | 28947847  | 30  | 7  | 5E+05 | 0.00010136 | RABEP2  | 0.017965085384 | 1 |
| COPD-HF | ENSG00000176476 | 16 | 28565236 | 28603111  | 77  | 9  | 5E+05 | 9.6188e-05 | CCDC101 | 0.017213916543 | 1 |
| COPD-HF | ENSG00000172037 | 3  | 49158547 | 49170551  | 10  | 6  | 5E+05 | 8.5042e-05 | LAMB2   | 0.015368423392 | 1 |
| COPD-HF | ENSG00000164076 | 3  | 49895421 | 49907655  | 15  | 3  | 5E+05 | 8.1148e-05 | CAMKV   | 0.014809911722 | 1 |
| COPD-HF | ENSG00000143774 | 1  | 2.28E+08 | 228336685 | 12  | 4  | 5E+05 | 8.0757e-05 | GUK1    | 0.014809911722 | 1 |

|         |                 |    |          |           |      |    |       |            |            |                |             |
|---------|-----------------|----|----------|-----------|------|----|-------|------------|------------|----------------|-------------|
| COPD-HF | ENSG00000173145 | 10 | 96075004 | 96122716  | 92   | 9  | 5E+05 | 8.0324e-05 | NOC3L      | 0.014809911722 | 1           |
| COPD-HF | ENSG00000157884 | 2  | 26804070 | 26864236  | 128  | 16 | 5E+05 | 7.9515e-05 | CIB4       | 0.014809911722 | 1           |
| COPD-HF | ENSG00000198835 | 1  | 2.28E+08 | 228347527 | 12   | 4  | 5E+05 | 7.1916e-05 | GJC2       | 0.013666264206 | 1           |
| COPD-HF | ENSG00000170291 | 17 | 7154735  | 7163259   | 12   | 3  | 5E+05 | 7.0872e-05 | ELP5       | 0.013608162    | 1           |
| COPD-HF | ENSG00000067560 | 3  | 49396578 | 49450431  | 79   | 8  | 5E+05 | 6.992e-05  | RHOA       | 0.013566688    | 1           |
| COPD-HF | ENSG00000164038 | 4  | 1.04E+08 | 104006986 | 72   | 16 | 5E+05 | 6.7226e-05 | SLC9B2     | 0.013182732531 | 1           |
| COPD-HF | ENSG00000176095 | 3  | 49761727 | 49823975  | 82   | 8  | 5E+05 | 6.693e-05  | IP6K1      | 0.013182732531 | 1           |
| COPD-HF | ENSG00000138640 | 4  | 89647106 | 90032549  | 1106 | 43 | 5E+05 | 6.3502e-05 | FAM13A     | 0.012723177891 | 1           |
| COPD-HF | ENSG00000117597 | 1  | 2.1E+08  | 210030910 | 97   | 10 | 5E+05 | 6.3029e-05 | DIEXF      | 0.012723177891 | 1           |
| COPD-HF | ENSG00000164068 | 3  | 49726932 | 49758962  | 44   | 7  | 5E+05 | 6.2126e-05 | RNF123     | 0.012723177891 | 1           |
| COPD-HF | ENSG00000175826 | 17 | 7146910  | 7155810   | 5    | 2  | 5E+05 | 5.8871e-05 | CTDNEP1    | 0.012192911719 | 1           |
| COPD-HF | ENSG00000132612 | 16 | 69345259 | 69358949  | 34   | 7  | 5E+05 | 5.4975e-05 | VPS4A      | 0.011515388352 | 1           |
| COPD-HF | ENSG00000169682 | 16 | 28985542 | 28995869  | 12   | 4  | 5E+05 | 4.8071e-05 | SPNS1      | 0.010184974057 | 0.886092743 |
| COPD-HF | ENSG00000262302 | 17 | 7150148  | 7165408   | 21   | 3  | 5E+05 | 4.5951e-05 | RP1-4G17.1 | 0.009849009104 | 0.847014783 |
| COPD-HF | ENSG00000109332 | 4  | 1.04E+08 | 103790053 | 145  | 7  | 5E+05 | 4.5834e-05 | UBE2D3     | 0.009849009104 | 0.844858122 |
| COPD-HF | ENSG00000188603 | 16 | 28477983 | 28506896  | 28   | 5  | 5E+05 | 4.4883e-05 | CLN3       | 0.009849009104 | 0.827328339 |
| COPD-HF | ENSG00000197165 | 16 | 28603264 | 28608430  | 18   | 4  | 5E+05 | 4.3956e-05 | SULT1A2    | 0.009761939132 | 0.810240948 |
| COPD-HF | ENSG00000181885 | 17 | 7163222  | 7167302   | 6    | 3  | 5E+05 | 4.3049e-05 | CLDN7      | 0.009677100207 | 0.793522217 |
| COPD-HF | ENSG00000164270 | 5  | 1.48E+08 | 148056798 | 467  | 33 | 5E+05 | 3.8994e-05 | HTR4       | 0.008873782740 | 0.718776402 |
| COPD-HF | ENSG00000101204 | 20 | 61975420 | 62009753  | 173  | 31 | 5E+05 | 3.87e-05   | CHRNA4     | 0.008873782740 | 0.7133571   |
| COPD-HF | ENSG00000163798 | 2  | 27886338 | 27917840  | 23   | 8  | 5E+05 | 3.739e-05  | SLC4A1AP0  | 0.008724175569 | 0.68920987  |
| COPD-HF | ENSG00000167085 | 17 | 47481414 | 47492246  | 24   | 8  | 5E+05 | 3.5687e-05 | PHB        | 0.008433570141 | 0.657818471 |
| COPD-HF | ENSG00000261832 | 16 | 28477974 | 28503333  | 23   | 4  | 5E+05 | 3.5637e-05 | CLN3       | 0.008433570141 | 0.656896821 |
| COPD-HF | ENSG00000145354 | 4  | 1.04E+08 | 103810399 | 33   | 4  | 5E+05 | 3.1853e-05 | CISD2      | 0.007725609855 | 0.587146349 |
| COPD-HF | ENSG00000173402 | 3  | 49506146 | 49573048  | 97   | 10 | 5E+05 | 3.0442e-05 | DAG1       | 0.007481831813 | 0.561137386 |
| COPD-HF | ENSG00000166822 | 16 | 75476952 | 75499395  | 80   | 10 | 5E+05 | 2.5783e-05 | TMEM170    | 0.006422405932 | 0.475258039 |
| COPD-HF | ENSG00000198373 | 16 | 69796209 | 69975644  | 422  | 24 | 5E+05 | 2.4949e-05 | WWP2       | 0.006299793383 | 0.459884917 |
| COPD-HF | ENSG00000132604 | 16 | 69389464 | 69442474  | 82   | 14 | 5E+05 | 2.4517e-05 | TERF2      | 0.006276692513 | 0.451921861 |
| COPD-HF | ENSG00000080644 | 15 | 78885394 | 78913637  | 34   | 4  | 5E+05 | 2.3454e-05 | CHRNA3     | 0.006089120873 | 0.432327582 |
| COPD-HF | ENSG00000197183 | 20 | 31030862 | 31172876  | 229  | 22 | 5E+05 | 2.0296e-05 | C2orf112   | 0.005344516685 | 0.374116168 |

|         |                 |    |          |           |     |    |       |            |           |                |             |
|---------|-----------------|----|----------|-----------|-----|----|-------|------------|-----------|----------------|-------------|
| COPD-HF | ENSG00000172818 | 11 | 65554493 | 65564690  | 23  | 6  | 5E+05 | 2.0186e-05 | OVOL1     | 0.005344516685 | 0.372088538 |
| COPD-HF | ENSG00000164037 | 4  | 1.04E+08 | 103940896 | 229 | 8  | 5E+05 | 2.0067e-05 | SLC9B1    | 0.005344516685 | 0.369895011 |
| COPD-HF | ENSG00000109736 | 4  | 2932288  | 2936586   | 7   | 3  | 5E+05 | 1.9112e-05 | MFSD10    | 0.005258082029 | 0.352291496 |
| COPD-HF | ENSG00000169684 | 15 | 78857862 | 78887611  | 34  | 4  | 5E+05 | 1.8066e-05 | CHRNA5    | 0.005045614818 | 0.333010578 |
| COPD-HF | ENSG00000145029 | 3  | 49460379 | 49466759  | 7   | 4  | 5E+05 | 1.7996e-05 | NICN1     | 0.005045614818 | 0.331720268 |
| COPD-HF | ENSG00000145022 | 3  | 49449639 | 49453908  | 6   | 2  | 5E+05 | 1.7376e-05 | TCTA      | 0.00500456     | 0.320291808 |
| COPD-HF | ENSG00000164062 | 3  | 49711435 | 49721396  | 7   | 2  | 5E+05 | 1.6281e-05 | APEH      | 0.004763613857 | 0.300107673 |
| COPD-HF | ENSG00000101346 | 20 | 30795683 | 30826470  | 33  | 5  | 5E+05 | 1.4273e-05 | POFUT1    | 0.004243454983 | 0.263094209 |
| COPD-HF | ENSG00000205884 | 8  | 11831446 | 11832108  | 4   | 2  | 5E+05 | 1.1426e-05 | DEFB136   | 0.003452712426 | 0.210615458 |
| COPD-HF | ENSG00000205334 | 2  | 27928653 | 27938599  | 13  | 4  | 5E+05 | 1.0814e-05 | AC074091  | 0.003322241033 | 0.199334462 |
| COPD-HF | ENSG00000040633 | 17 | 7138347  | 7143041   | 4   | 2  | 5E+05 | 1.0587e-05 | PHF23     | 0.003307630016 | 0.195150171 |
| COPD-HF | ENSG00000260914 | 16 | 69333585 | 69354614  | 33  | 5  | 5E+05 | 8.8901e-06 | RP11-343C | 0.002825365746 | 0.163871213 |
| COPD-HF | ENSG00000255098 | 8  | 11870545 | 11873043  | 3   | 2  | 5E+05 | 7.9969e-06 | RP11-481A | 0.002586085222 | 0.147406858 |
| COPD-HF | ENSG00000104626 | 8  | 8859657  | 8974256   | 400 | 25 | 5E+05 | 7.6454e-06 | ERI1      | 0.002516565    | 0.140927658 |
| COPD-HF | ENSG00000136770 | 10 | 22045466 | 22292698  | 331 | 16 | 5E+05 | 6.0281e-06 | DNAJC1    | 0.002020290314 | 0.111115967 |
| COPD-HF | ENSG00000204682 | 10 | 21781587 | 21786191  | 7   | 3  | 5E+05 | 6.0167e-06 | CASC10    | 0.002020290314 | 0.110905831 |
| COPD-HF | ENSG00000261717 | 16 | 75446582 | 75498604  | 184 | 11 | 5E+05 | 5.8507e-06 | RP11-77K1 | 0.002020290314 | 0.107845953 |
| COPD-HF | ENSG00000138193 | 10 | 95753746 | 96092580  | 552 | 43 | 5E+05 | 5.5829e-06 | PLCE1     | 0.001979030686 | 0.102909596 |
| COPD-HF | ENSG00000181856 | 17 | 7184986  | 7191576   | 6   | 2  | 5E+05 | 5.5329e-06 | SLC2A4    | 0.001979030686 | 0.101987946 |
| COPD-HF | ENSG00000175206 | 1  | 11905766 | 11908402  | 11  | 4  | 5E+05 | 4.89e-06   | NPPA      | 0.001802747    | 0.09013737  |
| COPD-HF | ENSG00000136574 | 8  | 11534468 | 11617511  | 241 | 34 | 5E+05 | 4.857e-06  | GATA4     | 0.001802747    | 0.089529081 |
| COPD-HF | ENSG00000126003 | 20 | 30780306 | 30795594  | 10  | 2  | 5E+05 | 4.6185e-06 | PLAGL2    | 0.001773600218 | 0.085132811 |
| COPD-HF | ENSG00000233276 | 3  | 49394609 | 49396033  | 2   | 1  | 5E+05 | 4.5515e-06 | GPX1      | 0.001773600218 | 0.0838978   |
| COPD-HF | ENSG00000142599 | 1  | 8412457  | 8877702   | 598 | 19 | 5E+05 | 4.4095e-06 | RERE      | 0.001766963336 | 0.081280314 |
| COPD-HF | ENSG00000153774 | 16 | 75327596 | 75467383  | 451 | 15 | 5E+05 | 3.3769e-06 | CFDP1     | 0.001383253282 | 0.062246398 |
| COPD-HF | ENSG00000164061 | 3  | 49591922 | 49708978  | 148 | 13 | 5E+05 | 3.1492e-06 | BSN       | 0.001319300081 | 0.058049204 |
| COPD-HF | ENSG00000075413 | 14 | 1.04E+08 | 103970168 | 254 | 9  | 5E+05 | 2.6178e-06 | MARK3     | 0.001122183893 | 0.048253907 |
| COPD-HF | ENSG00000173273 | 8  | 9413424  | 9639856   | 726 | 17 | 5E+05 | 2.1404e-06 | TNKS      | 0.000939380790 | 0.039453993 |
| COPD-HF | ENSG00000004975 | 17 | 7128660  | 7137864   | 11  | 3  | 5E+05 | 2.093e-06  | DVL2      | 0.000939380790 | 0.038580269 |
| COPD-HF | ENSG00000087269 | 4  | 2939660  | 2965112   | 53  | 8  | 5E+05 | 1.9032e-06 | NOP14     | 0.000877042    | 0.035081686 |

|         |                 |    |          |           |      |     |       |            |            |                 |                 |
|---------|-----------------|----|----------|-----------|------|-----|-------|------------|------------|-----------------|-----------------|
| COPD-HF | ENSG00000215346 | 8  | 10983980 | 10987745  | 11   | 3   | 5E+05 | 1.8319e-06 | AF131215.4 | 0.000865831094  | 0.033767413     |
| COPD-HF | ENSG00000154342 | 1  | 2.28E+08 | 228248961 | 87   | 10  | 5E+05 | 1.8181e-06 | WNT3A      | 0.000865831094  | 0.033513037     |
| COPD-HF | ENSG00000205882 | 8  | 11850692 | 11853821  | 14   | 4   | 5E+05 | 1.7815e-06 | DEFB134    | 0.000865831094  | 0.03283839      |
| COPD-HF | ENSG00000171303 | 2  | 26915619 | 26956288  | 74   | 11  | 5E+05 | 1.3834e-06 | KCNK3      | 0.000708339227  | 0.025500212     |
| COPD-HF | ENSG00000166166 | 14 | 1.04E+08 | 104003410 | 18   | 3   | 5E+05 | 1.3176e-06 | TRMT61A    | 0.000693923451  | 0.024287321     |
| COPD-HF | ENSG00000173531 | 3  | 49721380 | 49726934  | 6    | 3   | 5E+05 | 1.3125e-06 | MST1       | 0.000693923451  | 0.024193313     |
| COPD-HF | ENSG00000125388 | 4  | 2965335  | 3042474   | 224  | 17  | 5E+05 | 1.2064e-06 | GRK4       | 0.000673865793  | 0.022237571     |
| COPD-HF | ENSG00000136573 | 8  | 11351510 | 11422113  | 241  | 23  | 5E+05 | 8.1673e-07 | BLK        | 0.000470462002  | 0.015054784     |
| COPD-HF | ENSG00000088808 | 14 | 1.04E+08 | 104313927 | 226  | 11  | 5E+05 | 7.7083e-07 | PPP1R13B   | 0.000458345464  | 0.014208709     |
| COPD-HF | ENSG00000254093 | 8  | 10622473 | 10697394  | 404  | 19  | 5E+05 | 5.858e-07  | PINX1      | 0.000359935046  | 0.010798051     |
| COPD-HF | ENSG00000196782 | 4  | 1.41E+08 | 141075338 | 985  | 104 | 5E+05 | 5.507e-07  | MAML3      | 0.000350036313  | 0.010151053     |
| COPD-HF | ENSG00000136379 | 15 | 80972025 | 81047962  | 224  | 25  | 5E+05 | 5.2782e-07 | ABHD17C    | 0.000347475216  | 0.009729306     |
| COPD-HF | ENSG00000147324 | 8  | 8640864  | 8751155   | 431  | 27  | 5E+05 | 4.6574e-07 | MFHAS1     | 0.000317962422  | 0.008584985     |
| COPD-HF | ENSG00000175806 | 8  | 9911778  | 10286401  | 1486 | 61  | 5E+05 | 4.2683e-07 | MSRA       | 0.000302606053  | 0.007867757     |
| COPD-HF | ENSG00000262039 | 17 | 47448102 | 47554350  | 253  | 36  | 5E+05 | 3.8572e-07 | RP11-81K20 | 0.000284399070  | 0.007109977     |
| COPD-HF | ENSG00000256500 | 14 | 1.04E+08 | 104152261 | 260  | 15  | 5E+05 | 2.7563e-07 | RP11-73M10 | 0.000211695324  | 0.005080688     |
| COPD-HF | ENSG00000087274 | 4  | 2845584  | 2931803   | 124  | 15  | 5E+05 | 1.9819e-07 | ADD1       | 0.000158836359  | 0.003653236     |
| COPD-HF | ENSG00000126214 | 14 | 1.04E+08 | 104167888 | 297  | 16  | 5E+05 | 1.7059e-07 | KLC1       | 0.000142931157  | 0.003144485     |
| COPD-HF | ENSG00000183638 | 8  | 10463859 | 10569697  | 304  | 38  | 5E+05 | 1.4333e-07 | RP1L1      | 0.000125809613  | 0.002642002     |
| COPD-HF | ENSG00000171056 | 8  | 10581278 | 10697357  | 559  | 19  | 5E+05 | 1.2864e-07 | SOX7       | 0.000118561     | 0.002371221     |
| COPD-HF | ENSG00000134245 | 1  | 1.13E+08 | 113072787 | 147  | 28  | 5E+05 | 1.0906e-07 | WNT2B      | 0.000105805     | 0.002010303     |
| COPD-HF | ENSG00000177000 | 1  | 11845780 | 11866977  | 78   | 11  | 5E+05 | 1.0144e-07 | MTHFR      | 0.000103880195  | 0.001869844     |
| COPD-HF | ENSG00000258724 | 8  | 10582909 | 10697357  | 553  | 19  | 5E+05 | 9.2425e-08 | SOX7       | 0.000100215883  | 0.00170367      |
| COPD-HF | ENSG00000078403 | 10 | 21823094 | 22032559  | 154  | 23  | 5E+05 | 8.8952e-08 | MLLT10     | 0.000100215883  | 0.001639652     |
| COPD-HF | ENSG00000072682 | 5  | 1.32E+08 | 131631008 | 235  | 21  | 5E+05 | 3.222e-08  | P4HA2      | 3.9594084e-05   | 0.000593911     |
| COPD-HF | ENSG00000011021 | 1  | 11866207 | 11903201  | 184  | 14  | 5E+05 | 3.1641e-08 | CLCN6      | 3.9594084e-05   | 0.000583239     |
| COPD-HF | ENSG00000131435 | 5  | 1.32E+08 | 131609147 | 41   | 7   | 5E+05 | 2.8037e-08 | PDLIM4     | 3.9594084e-05   | 0.000516806     |
| COPD-HF | ENSG00000100711 | 14 | 1.04E+08 | 104200005 | 40   | 9   | 5E+05 | 2.6904e-08 | ZFYVE21    | 3.9594084e-05   | 0.000495921     |
| COPD-HF | ENSG00000184608 | 8  | 11225911 | 11296167  | 280  | 23  | 5E+05 | 6.2746e-09 | C8orf12    | 1.0514518345450 | 0.0001156597018 |
| COPD-HF | ENSG00000197536 | 5  | 1.32E+08 | 131811736 | 179  | 17  | 5E+05 | 3.386e-09  | C5orf56    | 6.2414138e-06   | 6.2414138e-05   |

|         |                 |    |          |           |     |    |       |            |          |                  |                |
|---------|-----------------|----|----------|-----------|-----|----|-------|------------|----------|------------------|----------------|
| COPD-HF | ENSG00000198740 | 17 | 47366568 | 47439835  | 141 | 12 | 5E+05 | 3.2437e-09 | ZNF652   | 6.2414138e-06    | 5.97911221e-05 |
| COPD-HF | ENSG00000224997 | 14 | 1.04E+08 | 104179149 | 1   | 1  | 5E+05 | 2.5183e-09 | AL049840 | 5.8024779875e-14 | 6.4198239e-05  |
| COPD-HF | ENSG00000197208 | 5  | 1.32E+08 | 131679899 | 117 | 10 | 5E+05 | 2.3995e-09 | SLC22A4  | 5.8024779875e-14 | 4.2299835e-05  |
| COPD-HF | ENSG00000256053 | 14 | 1.04E+08 | 104073860 | 94  | 11 | 5E+05 | 2.3609e-09 | APOPT1   | 5.8024779875e-14 | 3.5184697e-05  |
| COPD-HF | ENSG00000166170 | 14 | 1.04E+08 | 104029168 | 9   | 2  | 5E+05 | 1.445e-09  | BAG5     | 5.327137e-06     | 2.6635685e-05  |
| COPD-HF | ENSG00000197375 | 5  | 1.32E+08 | 131731306 | 82  | 8  | 5E+05 | 9.5719e-10 | SLC22A5  | 4.4109708175e-11 | 7.64388327e-05 |
| COPD-HF | ENSG00000171044 | 8  | 10753555 | 11058875  | 969 | 32 | 5E+05 | 5.0901e-10 | XKR6     | 3.12752711e-06   | 9.38258133e-06 |
| COPD-HF | ENSG00000126215 | 14 | 1.04E+08 | 104181841 | 27  | 6  | 5E+05 | 2.5895e-10 | XRCC3    | 2.386612675e-04  | 4.77322535e-06 |
| COPD-HF | ENSG00000127663 | 19 | 4969125  | 5153606   | 518 | 32 | 5E+05 | 1.6228e-10 | KDM4B    | 2.386612675e-04  | 2.99130724e-06 |

---

**Table S3: Results of the tissue-specific analysis**

| P          | FULL_NAME                                                                        | Trait_pair | Pbon           |
|------------|----------------------------------------------------------------------------------|------------|----------------|
| 3.3452e-09 | REACTOME_HIGHLY_CALCIUM_PERMEABLE_NICOTINIC_ACETYLCHOLINE_RECEPTORS              | COPD-HTN   | 5.68717452e-05 |
| 1.7113e-08 | REACTOME_HIGHLY_CALCIUM_PERMEABLE_POSTSYNAPTIC_NICOTINIC_ACETYLCHOLINE_RECEPTORS | COPD-HTN   | 0.000290921    |
| 3.4034e-08 | REACTOME_RUNX3_REGULATES_NOTCH_SIGNALING                                         | COPD-HTN   | 0.000578544    |
| 6.0025e-07 | REACTOME_ACETYLCHOLINE_BINDING_AND_DOWNSTREAM_EVENTS                             | COPD-HTN   | 0.01020305     |
| 9.7544e-07 | REACTOME_REGULATION_OF_GENE_EXPRESSION_IN_LATE_STAGE_BRANCHING                   | COPD-HTN   | 0.016579554    |
| 1.3351e-06 | REACTOME_FORMATION_OF_PARAXIAL_MESODERM                                          | COPD-HTN   | 0.02269136     |
| 1.8389e-06 | GOCC_ACETYLCHOLINE_GATED_CHANNEL_COMPLEX                                         | COPD-HTN   | 0.031252106    |
| 3.3452e-09 | REACTOME_HIGHLY_CALCIUM_PERMEABLE_NICOTINIC_ACETYLCHOLINE_RECEPTORS              | COPD-HF    | 5.68717452e-05 |
| 1.7113e-08 | REACTOME_HIGHLY_CALCIUM_PERMEABLE_POSTSYNAPTIC_NICOTINIC_ACETYLCHOLINE_RECEPTORS | COPD-HF    | 0.000290921    |
| 3.4034e-08 | REACTOME_RUNX3_REGULATES_NOTCH_SIGNALING                                         | COPD-HF    | 0.000578544    |
| 6.0025e-07 | REACTOME_ACETYLCHOLINE_BINDING_AND_DOWNSTREAM_EVENTS                             | COPD-HF    | 0.01020305     |
| 9.7544e-07 | REACTOME_REGULATION_OF_GENE_EXPRESSION_IN_LATE_STAGE_BRANCHING                   | COPD-HF    | 0.016579554    |
| 1.3351e-06 | REACTOME_FORMATION_OF_PARAXIAL_MESODERM                                          | COPD-HF    | 0.02269136     |
| 1.8389e-06 | GOCC_ACETYLCHOLINE_GATED_CHANNEL_COMPLEX                                         | COPD-HF    | 0.031252106    |
| 1.2016e-08 | REACTOME_HIGHLY_CALCIUM_PERMEABLE_NICOTINIC_ACETYLCHOLINE_RECEPTORS              | COPD-CHD   | 0.000204284    |
| 3.1493e-08 | REACTOME_HIGHLY_CALCIUM_PERMEABLE_POSTSYNAPTIC_NICOTINIC_ACETYLCHOLINE_RECEPTORS | COPD-CHD   | 0.000535381    |
| 4.1221e-08 | REACTOME_ACETYLCHOLINE_BINDING_AND_DOWNSTREAM_EVENTS                             | COPD-CHD   | 0.000700716    |
| 1.4433e-07 | GOMF_ACETYLCHOLINE_GATED_MONOATOMIC_CATION_SELECTIVE_CHANNEL_ACTIVITY            | COPD-CHD   | 0.002453321    |
| 1.4281e-06 | REACTOME_HIGHLY_SODIUM_PERMEABLE_POSTSYNAPTIC_ACETYLCHOLINE_NICOTINIC_RECEPTORS  | COPD-CHD   | 0.024273416    |
| 2.46e-06   | GOBP_HIGH_DENSITY_LIPOPROTEIN_PARTICLE_CLEARANCE                                 | COPD-CHD   | 0.04181016     |

**Table S4. SNP loci associated with COPD–CVD identified by PLACO**

| Trait pair | SNP         | CHR | BP        | effect allele | other allele | eaf       | beta      | se        | pval      | T.placo      | p.placo               |
|------------|-------------|-----|-----------|---------------|--------------|-----------|-----------|-----------|-----------|--------------|-----------------------|
| COPD-CHD   | rs55882046  | 1   | 109819981 | T             | C            | 0.0496384 | -0.07967  | 0.0240811 | 0.0009383 | 23.211609702 | 3.74781711151106e-10  |
| COPD-CHD   | rs67269326  | 1   | 109819615 | T             | C            | 0.0496776 | -0.079563 | 0.0240684 | 0.0009473 | 23.222989085 | (3.70976609520531e-10 |
| COPD-CHD   | rs66795935  | 1   | 109804883 | G             | C            | 0.0500057 | -0.082601 | 0.0239732 | 0.0005699 | 23.325319438 | (3.38449991669713e-10 |
| COPD-CHD   | rs12746961  | 1   | 109800321 | T             | C            | 0.0500259 | -0.08303  | 0.0239834 | 0.0005362 | 23.421384261 | 3.10517310887081e-10  |
| COPD-CHD   | rs12731760  | 1   | 109800349 | A             | G            | 0.0500261 | -0.083059 | 0.0239832 | 0.0005338 | 23.433335767 | 3.07207623907108e-10  |
| COPD-CHD   | rs11577931  | 1   | 109820884 | G             | A            | 0.0502652 | -0.082628 | 0.0239455 | 0.0005592 | 23.953362606 | 1.92745576841282e-10  |
| COPD-HTN   | rs2793353   | 10  | 22145688  | G             | A            | 0.73124   | -0.041947 | 0.0115978 | 0.0002983 | 18.724862335 | 4.67740723435293e-08  |
| COPD-HTN   | rs1243188   | 10  | 21908803  | C             | T            | 0.28608   | 0.0348312 | 0.0114002 | 0.0022482 | 18.758664303 | (4.54234854659564e-08 |
| COPD-HTN   | rs2666764   | 10  | 22150711  | G             | A            | 0.742032  | -0.041598 | 0.0117399 | 0.0003951 | 18.804948388 | 4.3637264184388e-08   |
| COPD-HTN   | rs2941732   | 10  | 22231670  | G             | A            | 0.742301  | -0.041818 | 0.0117429 | 0.0003693 | 18.892934163 | 4.0433258466079e-08   |
| COPD-HTN   | rs2666759   | 10  | 22254978  | T             | A            | 0.739502  | -0.043261 | 0.0117008 | 0.0002179 | 19.021948819 | (3.61560781806439e-08 |
| COPD-HTN   | rs806774    | 10  | 22114427  | T             | A            | 0.72898   | -0.040246 | 0.011566  | 0.0005019 | 19.022605562 | (3.61355070068733e-08 |
| COPD-HTN   | rs1243193   | 10  | 21981257  | G             | T            | 0.288474  | 0.0356052 | 0.0113688 | 0.0017372 | 19.132546975 | (3.2851870598193e-08  |
| COPD-HTN   | rs10828266  | 10  | 22098701  | G             | A            | 0.729466  | -0.040549 | 0.0115581 | 0.000451  | 19.140433408 | (3.26281450230342e-08 |
| COPD-HTN   | rs41275486  | 1   | 11890105  | A             | G            | 0.0331753 | 0.0746723 | 0.0282046 | 0.0081083 | -19.151129   | 3.23271518337567e-08  |
| COPD-HTN   | rs10740991  | 10  | 22058137  | C             | G            | 0.729935  | -0.04121  | 0.0115796 | 0.0003725 | 19.164551233 | 3.195338087388e-08    |
| COPD-HTN   | rs41275482  | 1   | 11889213  | G             | T            | 0.0333287 | 0.0764155 | 0.0281218 | 0.0065816 | -19.387588   | 2.63389050739599e-08  |
| COPD-HTN   | rs7072776   | 10  | 22032942  | G             | A            | 0.762165  | -0.045538 | 0.0120238 | 0.0001523 | 19.499937858 | 2.3896372424122e-08   |
| COPD-HTN   | rs55668272  | 1   | 11839033  | T             | G            | 0.01666   | 0.124986  | 0.0385869 | 0.0011992 | -19.520768   | 2.34690825881384e-08  |
| COPD-HTN   | rs41275506  | 1   | 11903015  | T             | C            | 0.0333088 | 0.0760531 | 0.0281395 | 0.0068775 | -19.556698   | 2.274995590803e-08    |
| COPD-HTN   | rs2666773   | 10  | 22123768  | T             | A            | 0.729188  | -0.041718 | 0.0115707 | 0.0003115 | 19.590223065 | (2.20988767121242e-08 |
| COPD-HTN   | rs76219075  | 1   | 11889568  | C             | G            | 0.0333287 | 0.0764155 | 0.0281218 | 0.0065816 | -19.605333   | 2.1811563798316e-08   |
| COPD-HTN   | rs41275476  | 1   | 11887125  | T             | C            | 0.0333287 | 0.076415  | 0.0281218 | 0.0065819 | -19.605786   | 2.18030000883593e-08  |
| COPD-HTN   | rs77327024  | 1   | 11888923  | C             | T            | 0.0333287 | 0.0764155 | 0.0281218 | 0.0065816 | -19.60581    | 2.18025423039951e-08  |
| COPD-HTN   | rs75049241  | 1   | 11886699  | A             | G            | 0.0333287 | 0.076415  | 0.0281218 | 0.0065819 | -19.606585   | 2.17879134018545e-08  |
| COPD-HTN   | rs41275474  | 1   | 11884619  | A             | G            | 0.0333287 | 0.0764149 | 0.0281218 | 0.006582  | -19.609518   | 2.17326501399517e-08  |
| COPD-HTN   | rs61764037  | 1   | 11904186  | G             | A            | 0.0333029 | 0.0758548 | 0.0281439 | 0.0070336 | -19.612389   | 2.16786799278942e-08  |
| COPD-HTN   | rs41275496  | 1   | 11895966  | C             | G            | 0.0333239 | 0.0763981 | 0.0281257 | 0.0066015 | -19.618887   | 2.15570069302345e-08  |
| COPD-HTN   | rs77204442  | 1   | 11883575  | G             | C            | 0.0333287 | 0.0764139 | 0.0281218 | 0.0065826 | -19.63475    | 2.12628649817636e-08  |
| COPD-HTN   | rs76823085  | 1   | 11883548  | T             | A            | 0.0333287 | 0.0764139 | 0.0281218 | 0.0065826 | -19.636804   | 2.12250788237087e-08  |
| COPD-HTN   | rs75297615  | 1   | 11892757  | G             | A            | 0.0333287 | 0.0764168 | 0.0281218 | 0.0065807 | -19.650423   | 2.09762132916929e-08  |
| COPD-HTN   | rs13306560  | 1   | 11866183  | T             | C            | 0.0333269 | 0.0765709 | 0.0281227 | 0.0064743 | -19.651754   | 2.09520358785059e-08  |
| COPD-HTN   | rs111334345 | 1   | 11866442  | A             | G            | 0.016685  | 0.125361  | 0.0385745 | 0.0011547 | -19.652483   | 2.09388146624037e-08  |

|          |             |    |          |   |   |           |           |           |           |                |                      |
|----------|-------------|----|----------|---|---|-----------|-----------|-----------|-----------|----------------|----------------------|
| COPD-HTN | rs111293470 | 1  | 11895141 | A | G | 0.0166874 | 0.124929  | 0.0385731 | 0.0012005 | -19.653445     | 2.09213817987289e-08 |
| COPD-HTN | rs75545998  | 1  | 11891955 | T | C | 0.0333287 | 0.0764168 | 0.0281218 | 0.0065807 | -19.6539       | 2.09131436087717e-08 |
| COPD-HTN | rs112140974 | 1  | 11891331 | G | A | 0.0333287 | 0.0764157 | 0.0281218 | 0.0065814 | -19.654737     | 2.08979762582969e-08 |
| COPD-HTN | rs76033082  | 1  | 11891557 | A | G | 0.0333287 | 0.0764157 | 0.0281218 | 0.0065814 | -19.654737     | 2.08979762582969e-08 |
| COPD-HTN | rs79296154  | 1  | 11882486 | A | G | 0.0333287 | 0.0764139 | 0.0281218 | 0.0065826 | -19.658496     | 2.08300678361147e-08 |
| COPD-HTN | rs78366115  | 1  | 11879468 | T | C | 0.0333268 | 0.076558  | 0.0281228 | 0.0064834 | -19.6946       | 2.01888423159527e-08 |
| COPD-HTN | rs76148073  | 1  | 11879066 | G | C | 0.0333268 | 0.076558  | 0.0281228 | 0.0064834 | -19.694787     | 2.01855699523368e-08 |
| COPD-HTN | rs74983098  | 1  | 11878226 | A | G | 0.0333268 | 0.076558  | 0.0281228 | 0.0064834 | -19.696523     | 2.01552392728775e-08 |
| COPD-HTN | rs79171214  | 1  | 11879103 | C | T | 0.0333268 | 0.076558  | 0.0281228 | 0.0064834 | -19.696767     | 2.01509917988735e-08 |
| COPD-HTN | rs79904915  | 1  | 11877979 | C | A | 0.0333268 | 0.076558  | 0.0281228 | 0.0064834 | -19.696949     | 2.0147803125764e-08  |
| COPD-HTN | rs74771026  | 1  | 11893830 | A | T | 0.0333286 | 0.0764188 | 0.0281218 | 0.0065792 | -19.697218     | 2.01431090931285e-08 |
| COPD-HTN | rs78642329  | 1  | 11877646 | A | G | 0.0333268 | 0.076558  | 0.0281228 | 0.0064834 | -19.697563     | 2.01371053963969e-08 |
| COPD-HTN | rs111650969 | 1  | 11875709 | G | C | 0.0333268 | 0.0765576 | 0.0281228 | 0.0064837 | -19.69777      | 2.0133486848519e-08  |
| COPD-HTN | rs75367103  | 1  | 11877131 | T | A | 0.0333268 | 0.076558  | 0.0281228 | 0.0064834 | -19.698363     | 2.0123151356315e-08  |
| COPD-HTN | rs74866971  | 1  | 11877062 | A | C | 0.0333268 | 0.076558  | 0.0281228 | 0.0064834 | -19.698737     | 2.01166286562205e-08 |
| COPD-HTN | rs76337233  | 1  | 11893869 | T | C | 0.0166873 | 0.124912  | 0.0385733 | 0.0012024 | -19.702068     | 2.00586808341141e-08 |
| COPD-HTN | rs78054341  | 1  | 11892779 | G | A | 0.0333287 | 0.0764168 | 0.0281218 | 0.0065807 | -19.71184      | 1.98896539819428e-08 |
| COPD-HTN | rs76288343  | 1  | 11892651 | A | G | 0.0333287 | 0.0764168 | 0.0281218 | 0.0065807 | -19.71432      | 1.98469845371291e-08 |
| COPD-HTN | rs78436614  | 1  | 11892002 | G | A | 0.0333287 | 0.0764168 | 0.0281218 | 0.0065807 | -19.715543     | 1.98259676766278e-08 |
| COPD-HTN | rs76335758  | 1  | 11891613 | G | A | 0.0333287 | 0.0764157 | 0.0281218 | 0.0065814 | -19.716567     | 1.98083961961591e-08 |
| COPD-HTN | rs112859107 | 1  | 11891480 | G | A | 0.0333287 | 0.0764157 | 0.0281218 | 0.0065814 | -19.716754     | 1.98051918804758e-08 |
| COPD-HTN | rs41275490  | 1  | 11890390 | A | G | 0.0333287 | 0.0764157 | 0.0281218 | 0.0065814 | -19.726077     | 1.96459418225942e-08 |
| COPD-HTN | rs79025427  | 1  | 11897992 | A | G | 0.0333164 | 0.0763434 | 0.0281317 | 0.0066518 | -19.731642     | 1.9551475294765e-08  |
| COPD-HTN | rs111479605 | 1  | 11899470 | T | C | 0.0333164 | 0.0763418 | 0.0281317 | 0.006653  | -19.734227     | 1.95077687138735e-08 |
| COPD-HTN | rs76161097  | 1  | 11872820 | A | G | 0.0333268 | 0.0765582 | 0.0281228 | 0.0064832 | -19.735527     | 1.94858209717801e-08 |
| COPD-HTN | rs77785799  | 1  | 11900142 | T | C | 0.0333164 | 0.0763403 | 0.0281318 | 0.0066543 | -19.736106     | 1.94760479073624e-08 |
| COPD-HTN | rs74053326  | 1  | 11895624 | G | A | 0.0333281 | 0.0764385 | 0.0281218 | 0.0065654 | -19.741854     | 1.9379348747959e-08  |
| COPD-HTN | rs79429328  | 1  | 11899803 | T | C | 0.0333164 | 0.0763321 | 0.0281318 | 0.0066602 | -19.746399     | 1.93032208512578e-08 |
| COPD-HTN | rs41452445  | 1  | 11858584 | C | T | 0.0333319 | 0.076876  | 0.028121  | 0.0062615 | -19.756562     | 1.91340806442002e-08 |
| COPD-HTN | rs74053327  | 1  | 11895667 | C | G | 0.0333278 | 0.0764165 | 0.0281223 | 0.0065819 | -19.761936     | 1.90452381499794e-08 |
| COPD-HTN | rs41275508  | 1  | 11904049 | G | C | 0.0333036 | 0.075856  | 0.0281436 | 0.0070322 | -19.772523     | 1.88714356895622e-08 |
| COPD-HTN | rs41275504  | 1  | 11902149 | G | A | 0.0333124 | 0.0761905 | 0.028136  | 0.0067703 | -19.815991     | 1.81742983910706e-08 |
| COPD-HTN | rs1269454   | 10 | 21937919 | A | G | 0.28295   | 0.0373861 | 0.0114325 | 0.0010748 | 19.82313191251 | 1.8062269142189e-08  |
| COPD-HTN | rs1057624   | 1  | 11846270 | C | T | 0.0166664 | 0.124763  | 0.0385742 | 0.0012192 | -19.830148     | 1.79528718101245e-08 |
| COPD-HTN | rs45577533  | 1  | 11857576 | C | T | 0.0333345 | 0.0769853 | 0.0281181 | 0.0061827 | -19.831346     | 1.79342599669001e-08 |

|          |             |    |           |   |   |           |           |           |             |               |                      |
|----------|-------------|----|-----------|---|---|-----------|-----------|-----------|-------------|---------------|----------------------|
| COPD-HTN | rs112007883 | 1  | 11899349  | T | C | 0.0166862 | 0.125351  | 0.0385771 | 0.0011566   | -19.831881    | 1.79259512232619e-08 |
| COPD-HTN | rs13306567  | 1  | 11860465  | G | C | 0.0333294 | 0.0766992 | 0.0281232 | 0.0063865   | -19.873111    | 1.72972621950449e-08 |
| COPD-HTN | rs45532338  | 1  | 11859908  | T | C | 0.0333301 | 0.0767671 | 0.0281227 | 0.0063388   | -19.894465    | 1.69803813706074e-08 |
| COPD-HTN | rs113586584 | 1  | 11870161  | C | T | 0.016685  | 0.125361  | 0.0385745 | 0.0011547   | -19.898424    | 1.69222728167466e-08 |
| COPD-HTN | rs111847924 | 1  | 11859747  | A | G | 0.0333305 | 0.0767846 | 0.0281225 | 0.0063265   | -19.900341    | 1.68942153259806e-08 |
| COPD-HTN | rs80038130  | 1  | 11859606  | G | T | 0.0333307 | 0.0767892 | 0.0281223 | 0.0063231   | -19.901521    | 1.68769531551988e-08 |
| COPD-HTN | rs45533333  | 1  | 11858403  | T | C | 0.0333321 | 0.0769064 | 0.0281206 | 0.0062404   | -19.903662    | 1.68456986783031e-08 |
| COPD-HTN | rs80307360  | 1  | 11859132  | T | C | 0.0333313 | 0.0768388 | 0.0281218 | 0.0062884   | -19.903721    | 1.68448470679143e-08 |
| COPD-HTN | rs45468191  | 1  | 11859042  | G | A | 0.0333314 | 0.0768449 | 0.0281216 | 0.0062838   | -19.90409     | 1.6839464422117e-08  |
| COPD-HTN | rs77078602  | 1  | 11859390  | C | T | 0.033331  | 0.0768149 | 0.0281221 | 0.0063051   | -19.904369    | 1.68353985348995e-08 |
| COPD-HTN | rs4846044   | 1  | 11839998  | C | T | 0.98334   | -0.124971 | 0.0385864 | 0.0012006   | -19.912648    | 1.67151409109949e-08 |
| COPD-HTN | rs518789    | 1  | 10787538  | T | C | 0.463282  | -0.031003 | 0.0104668 | 0.0030562   | 19.9222663333 | 1.65765176707046e-08 |
| COPD-HTN | rs111776518 | 1  | 11867652  | G | C | 0.016685  | 0.125361  | 0.0385745 | 0.0011547   | -19.935578    | 1.63865594427567e-08 |
| COPD-HTN | rs112513913 | 1  | 11869549  | A | G | 0.016685  | 0.125361  | 0.0385745 | 0.0011547   | -19.955159    | 1.61110956017193e-08 |
| COPD-HTN | rs76351797  | 1  | 11867878  | T | C | 0.016685  | 0.125361  | 0.0385745 | 0.0011547   | -19.959879    | 1.60453819492179e-08 |
| COPD-HTN | rs4747438   | 10 | 22124263  | T | C | 0.6484    | -0.046961 | 0.0107742 | 1.30861e-05 | 19.9709439535 | 1.58924037840078e-08 |
| COPD-HTN | rs35593468  | 1  | 11860684  | A | G | 0.0166869 | 0.125537  | 0.0385717 | 0.0011354   | -19.989518    | 1.56388810585524e-08 |
| COPD-HTN | rs75800607  | 1  | 11869521  | G | A | 0.016685  | 0.125361  | 0.0385745 | 0.0011547   | -20.236567    | 1.26277241768729e-08 |
| COPD-HTN | rs74683406  | 1  | 11859636  | A | G | 0.0333763 | 0.0785094 | 0.028106  | 0.0052169   | -20.358391    | 1.13640174295501e-08 |
| COPD-HTN | rs72699046  | 1  | 113038761 | C | G | 0.155684  | 0.0499639 | 0.0141993 | 0.0004336   | 22.121584724  | 2.47358296196187e-09 |
| COPD-HTN | rs12037987  | 1  | 113042822 | C | T | 0.16936   | 0.0514101 | 0.0137111 | 0.0001772   | 24.938568000  | 2.17513230624738e-10 |
| COPD-HTN | rs3790607   | 1  | 113053023 | C | A | 0.175757  | 0.0483627 | 0.0135156 | 0.0003458   | 25.080616545  | 1.92446914991347e-10 |
| COPD-HTN | rs11102485  | 1  | 113052923 | G | C | 0.175964  | 0.0483923 | 0.0135067 | 0.0003399   | 25.113477781  | 1.8707274634901e-10  |
| COPD-HTN | rs12038119  | 1  | 113043423 | G | A | 0.169605  | 0.050488  | 0.0137067 | 0.0002301   | 25.140367204  | 1.82787155246745e-10 |
| COPD-HTN | rs10776752  | 1  | 113044328 | T | G | 0.170683  | 0.0488899 | 0.0136765 | 0.0003506   | 25.204097821  | 1.73018233295773e-10 |
| COPD-HTN | rs3790604   | 1  | 113046879 | A | C | 0.171844  | 0.0506321 | 0.0136431 | 0.0002063   | 26.294491595  | 6.76331806739937e-11 |

**Table S5. Pleiotropic genomic risk loci for COPD and cardiovascular diseases identified by FUMA**

| Trait_pair | rsID        | p                 | start    | end      | nSNPs | nGWASSNPs | nIndSigSNPs | nLeadSNPs | LeadSNPs                                     |
|------------|-------------|-------------------|----------|----------|-------|-----------|-------------|-----------|----------------------------------------------|
| COPD-HTN   | rs518789    | 1.65765176707e-08 | 10787538 | 10790797 | 4     | 4         | 1           | 1         | rs518789                                     |
| COPD-HTN   | rs74683406  | 1.13640174296e-08 | 11832368 | 11906821 | 91    | 75        | 2           | 1         | rs74683406                                   |
| COPD-HTN   | rs3790604   | 6.7633180674e-11  | 1.13E+08 | 1.13E+08 | 9     | 7         | 1           | 1         | rs3790604                                    |
| COPD-HTN   | rs11694327  | 8.98064455381e-14 | 26911509 | 26932887 | 26    | 13        | 2           | 1         | rs11694327                                   |
| COPD-HTN   | rs1263412   | 1.15162344386e-08 | 2845274  | 3028499  | 170   | 132       | 1           | 1         | rs1263412                                    |
| COPD-HTN   | rs35319653  | 3.84636099132e-08 | 1.41E+08 | 1.41E+08 | 76    | 64        | 1           | 1         | rs35319653                                   |
| COPD-HTN   | rs6866614   | 3.75831899167e-12 | 1.31E+08 | 1.32E+08 | 309   | 273       | 6           | 2         | rs6866614;rs10477741                         |
| COPD-HTN   | rs55730499  | 1.78984458624e-09 | 1.61E+08 | 1.61E+08 | 7     | 6         | 1           | 1         | rs55730499                                   |
| COPD-HTN   | rs9650657   | 1.26459629865e-10 | 8088230  | 12203305 | 1268  | 1024      | 19          | 4         | rs2979192;rs6601321;rs9650657;rs10087422     |
| COPD-HTN   | rs4747438   | 1.5892403784e-08  | 21769216 | 22288132 | 194   | 145       | 2           | 1         | rs4747438                                    |
| COPD-HTN   | rs604723    | 8.37873725608e-10 | 1.01E+08 | 1.01E+08 | 29    | 22        | 1           | 1         | rs604723                                     |
| COPD-HTN   | rs7137093   | 1.33507744622e-08 | 1.12E+08 | 1.12E+08 | 34    | 31        | 1           | 1         | rs7137093                                    |
| COPD-HTN   | rs60249782  | 1.00820161397e-09 | 1.04E+08 | 1.04E+08 | 119   | 92        | 1           | 1         | rs60249782                                   |
| COPD-HTN   | rs2759308   | 4.39902068579e-08 | 80987012 | 81066058 | 46    | 44        | 1           | 1         | rs2759308                                    |
| COPD-HTN   | rs16948048  | 9.67865551058e-12 | 47303456 | 47475549 | 120   | 92        | 4           | 1         | rs16948048                                   |
| COPD-HTN   | rs59027509  | 5.10533164894e-09 | 4970593  | 5176149  | 136   | 111       | 2           | 1         | rs59027509                                   |
| COPD-HF    | rs11577931  | 1.92745576841e-10 | 1.1E+08  | 1.1E+08  | 7     | 7         | 1           | 1         | rs11577931                                   |
| COPD-HF    | rs2457566   | 1.22838513743e-12 | 1.61E+08 | 1.61E+08 | 127   | 101       | 4           | 2         | rs3125050;rs2457566                          |
| COPD-HF    | rs112635299 | 2.39635120658e-12 | 94838142 | 94844947 | 2     | 1         | 1           | 1         | rs112635299                                  |
| COPD-HF    | rs71417868  | 4.70255764796e-08 | 1.04E+08 | 1.04E+08 | 107   | 94        | 1           | 1         | rs71417868                                   |
| COPD-HF    | rs17228058  | 1.22108142598e-08 | 67441750 | 67468285 | 22    | 20        | 1           | 1         | rs17228058                                   |
| COPD-HF    | rs11857877  | 6.33772846075e-22 | 78837381 | 79236349 | 414   | 370       | 19          | 4         | rs28661610;rs146703613;rs11857877;rs74614608 |
| COPD-HF    | rs2285224   | 2.03341724691e-09 | 75304497 | 75516739 | 379   | 317       | 1           | 1         | rs2285224                                    |
| COPD-HF    | rs12952581  | 3.16585068869e-12 | 47260130 | 47475549 | 123   | 104       | 5           | 1         | rs12952581                                   |
| COPD-HF    | rs12972970  | 4.70997566e-13    | 45386467 | 45428234 | 27    | 26        | 3           | 1         | rs12972970                                   |
| COPD-HF    | rs4809542   | 4.25939158157e-08 | 61977640 | 61991833 | 9     | 8         | 1           | 1         | rs4809542                                    |
| COPD-HF    | rs28451064  | 1.22258043967e-09 | 35593827 | 35625113 | 15    | 13        | 1           | 1         | rs28451064                                   |
| COPD-CHD   | rs1810126   | 5.48820522499e-10 | 1.61E+08 | 1.61E+08 | 39    | 20        | 2           | 2         | rs1810126;rs71033586                         |

|          |             |                   |          |          |     |    |   |                         |
|----------|-------------|-------------------|----------|----------|-----|----|---|-------------------------|
| COPD-CHD | rs1412832   | 1.17889744598e-08 | 21997015 | 22101702 | 26  | 8  | 1 | 1 rs1412832             |
| COPD-CHD | rs112635299 | 4.08175173533e-10 | 94838142 | 94844947 | 2   | 1  | 1 | 1 rs112635299           |
| COPD-CHD | rs4438276   | 1.32583339506e-10 | 78884553 | 79202749 | 119 | 99 | 5 | 2 rs117832812;rs4438276 |
| COPD-CHD | rs917054    | 1.66670631441e-09 | 47320418 | 47461433 | 96  | 86 | 3 | 1 rs917054              |
| COPD-CHD | rs11556505  | 6.83745840117e-13 | 45386467 | 45428234 | 32  | 30 | 4 | 1 rs11556505            |
| COPD-CHD | rs6011779   | 2.16792667443e-09 | 61979793 | 61992005 | 8   | 5  | 2 | 1 rs6011779             |
| COPD-CHD | rs28451064  | 1.23007220572e-08 | 35593827 | 35625113 | 15  | 13 | 1 | 1 rs28451064            |

---

**Table S6.Results of the Bayesian colocalization analysis**

| rsID        | PP.H0.abf            | PP.H1.abf            | PP.H2.abf            | PP.H3.abf            | PP.H4.abf            | phen1 | phen2 |
|-------------|----------------------|----------------------|----------------------|----------------------|----------------------|-------|-------|
| rs28451064  | 0.928935412184339    | 0.0710228397377311   | 2.9620509520819e-05  | 2.25479781150481e-06 | 9.87277059761634e-06 | COPD  | HF    |
| rs2457566   | 0.518775328231863    | 0.480976320142381    | 0.000101741196897889 | 9.42757951515189e-05 | 5.23346337065017e-05 | COPD  | HF    |
| rs11577931  | 0.966271185600061    | 0.0334866173592305   | 0.000205875679126292 | 7.10551008591542e-06 | 2.92158514957979e-05 | COPD  | HF    |
| rs16948048  | 1.51964207520733e-06 | 4.9005610141959e-05  | 0.000641440818625622 | 0.0197056624020332   | 0.979602371527124    | COPD  | HTN   |
| rs11556505  | 1.74364319565299e-06 | 1.07346843517722e-05 | 0.0180215578099937   | 0.110077263683632    | 0.871888700178828    | COPD  | CHD   |
| rs55730499  | 0.000180596252267092 | 6.06624306315068e-06 | 0.148085302044231    | 0.00412659611460905  | 0.847601439345829    | COPD  | HTN   |
| rs3790604   | 1.04080436704129e-06 | 9.408049303644e-08   | 0.167400588700008    | 0.014313405981573    | 0.818284870433559    | COPD  | HTN   |
| rs6866614   | 8.90590348680747e-06 | 0.00172780008254758  | 0.00107215177218525  | 0.207214064649259    | 0.789977077592521    | COPD  | HTN   |
| rs1810126   | 1.11951685822061e-34 | 1.07373017685313e-34 | 0.129438975422927    | 0.123397938393977    | 0.747163086183097    | COPD  | CHD   |
| rs59027509  | 0.0037785136988194   | 0.00175228314850245  | 0.26753772711075     | 0.123466973816231    | 0.603464502225697    | COPD  | HTN   |
| rs60249782  | 0.00122909348612828  | 0.290747960914143    | 0.00053442278734656  | 0.125838624426335    | 0.581649898386047    | COPD  | HTN   |
| rs28451064  | 0.0112568157286429   | 0.000860652967866323 | 0.480577844649989    | 0.0362721067108945   | 0.471032579942608    | COPD  | CHD   |
| rs35319653  | 0.156590012944003    | 0.370777760293834    | 0.0155143811692815   | 0.0363145375616836   | 0.420803308031197    | COPD  | HTN   |
| rs917054    | 0.00949952695206134  | 0.32037990262217     | 0.0102891435138468   | 0.346697281601388    | 0.313134145310535    | COPD  | CHD   |
| rs74683406  | 5.47210339530708e-08 | 4.51220617356094e-09 | 0.63797020200142     | 0.0522962367449506   | 0.30973350202039     | COPD  | HTN   |
| rs1263412   | 0.00189866166946238  | 0.863163758743795    | 6.59196094300342e-05 | 0.0298631626443232   | 0.105008497332989    | COPD  | HTN   |
| rs2759308   | 4.41400466495153e-06 | 1.03197162102615e-07 | 0.884603879360398    | 0.0205867795568096   | 0.0948048238809657   | COPD  | HTN   |
| rs4747438   | 3.70852792799757e-05 | 1.25590378969188e-05 | 0.690235148523251    | 0.233674103330692    | 0.0760411038288796   | COPD  | HTN   |
| rs9650657   | 2.78788908506128e-06 | 8.96961600456585e-05 | 0.0280266699350917   | 0.901684692517547    | 0.0701961534982315   | COPD  | HTN   |
| rs604723    | 2.86479387662285e-11 | 4.03957113137685e-13 | 0.91706920229179     | 0.0128612841356056   | 0.0700695135435512   | COPD  | HTN   |
| rs1412832   | 8.55589693281892e-36 | 3.46610838627436e-38 | 0.970314452549646    | 0.00390509329024519  | 0.0257804541601072   | COPD  | CHD   |
| rs11694327  | 4.23605666569058e-13 | 9.82411403950312e-14 | 0.794924910114833    | 0.184335457324421    | 0.0207396325602228   | COPD  | HTN   |
| rs518789    | 3.2678785617224e-10  | 1.71096151259988e-13 | 0.99094249819516     | 0.00051028003715785  | 0.00854722144072466  | COPD  | HTN   |
| rs112635299 | 2.83280508345593e-14 | 0.9915468570193      | 1.83842389332141e-18 | 5.59518685509669e-05 | 0.00839719111212032  | COPD  | CHD   |
| rs6011779   | 7.85855064802458e-10 | 0.994126501575571    | 9.22421719921715e-14 | 0.00011092610535841  | 0.00576257153312476  | COPD  | CHD   |
| rs7137093   | 7.82330302430047e-06 | 4.02387760045868e-06 | 0.657339669485176    | 0.338094886462953    | 0.00455359687124627  | COPD  | HTN   |
| rs2285224   | 0.419341531821825    | 0.578790066586215    | 0.000319865640827471 | 0.00044038175678312  | 0.00110815419434944  | COPD  | HF    |
| rs112635299 | 2.85613261910604e-14 | 0.999712030398492    | 4.74551576366144e-19 | 1.63387645194812e-05 | 0.000271630836960318 | COPD  | HF    |

|            |                      |                   |                      |                       |                      |      |     |
|------------|----------------------|-------------------|----------------------|-----------------------|----------------------|------|-----|
| rs11857877 | 6.90592704372387e-71 | 0.999262316590073 | 3.32181923855789e-74 | 0.00048039777582234   | 0.000257285634107451 | COPD | HF  |
| rs4809542  | 8.04827807267116e-10 | 0.999732795139004 | 1.44481088843137e-14 | 1.76974979425818e-050 | 0.000249506558212835 | COPD | HF  |
| rs4438276  | 1.05320525467058e-70 | 0.996294128712847 | 3.69443774198532e-73 | 0.00349459338140673   | 0.000211277905738453 | COPD | CHD |
| rs12972970 | 0.139704560945439    | 0.860086724159521 | 4.3193239008992e-06  | 2.64137996232172e-050 | 0.000177981771516084 | COPD | HF  |
| rs12952581 | 0.0279923489467932   | 0.971731892729671 | 4.33492663170404e-06 | 0.000150362432531535  | 0.000121060964372451 | COPD | HF  |
| rs17228058 | 0.503814866230841    | 0.496045983221706 | 1.53146123175707e-05 | 1.49695928972872e-050 | 0.000108866342238013 | COPD | HF  |
| rs71417868 | 0.00345256524927359  | 0.995988528606346 | 1.57757905502078e-06 | 0.00045499424701376   | 0.000102334318311312 | COPD | HF  |

---

**Table S7. Shared pleiotropic regions across different trait combinations**

| Number | Locus_boundary                                                | Region   | Trait_pair                  |
|--------|---------------------------------------------------------------|----------|-----------------------------|
| 2      | 6:160680738-160978997, 6:160687412-161111700                  | 6q25.3   | COPD-HF, COPD-CHD           |
| 3      | 14:94838142-94844947, 14:94838142-94844947                    | 14q32.13 | COPD-HF, COPD-CHD           |
| 4      | 14:103991478-104184737, 14:104008136-104283445                | 14q32.33 | COPD-HF, COPD-HTN           |
| 5      | 15:67441750-67468285                                          | 15q22.33 | COPD-HF                     |
| 6      | 15:78837381-79236349, 15:78884553-79202749, 15:80987012-81066 | 15q25.1  | COPD-HF, COPD-CHD, COPD-HTN |
| 8      | 17:47260130-47475549, 17:47303456-47475549                    | 17q21.33 | COPD-HF, COPD-HTN           |
| 9      | 19:45386467-45428234, 19:45386467-45428234                    | 19q13.32 | COPD-HF, COPD-CHD           |
| 10     | 20:61977640-61991833, 20:61979793-61992005                    | 20q13.33 | COPD-HF, COPD-CHD           |
| 11     | 21:35593827-35625113, 21:35593827-35625113                    | 21q22.11 | COPD-HF, COPD-CHD           |
| 12     | 9:21997015-22101702                                           | 9p21.3   | COPD-CHD                    |
| 13     | 17:47320418-47461433                                          | 17q21.32 | COPD-CHD                    |
| 19     | 5:131336105-131833599                                         | 5q31.1   | COPD-HTN                    |
| 24     | 12:111705893-111814155                                        | 12q24.12 | COPD-HTN                    |
| 25     | 19:4970593-5176149                                            | 19p13.3  | COPD-HTN                    |

**Table S8. Potential intervention targets identified by the SMR method**

| Trait | probeID         | ProbeChr | Gene          | p_GWAS       | p_eQTL        | p_SMR        | p_HEIDI      | nsnp_HEIDI |
|-------|-----------------|----------|---------------|--------------|---------------|--------------|--------------|------------|
| HF    | ENSG00000138031 | 2        | ADCY3         | 2.606574e-03 | 1.789511e-108 | 2.852346e-03 | 9.803482e-01 | 20         |
| HF    | ENSG00000248275 | 5        | TRIM52-AS1    | 7.918264e-03 | 7.656999e-125 | 8.312217e-03 | 9.582295e-01 | 20         |
| HF    | ENSG00000215022 | 6        | RP1-257A7.4   | 3.258967e-03 | 3.360078e-44  | 3.991491e-03 | 9.544724e-01 | 20         |
| HF    | ENSG00000138092 | 2        | CENPO         | 2.498791e-03 | 8.436686e-63  | 2.927040e-03 | 9.422954e-01 | 20         |
| HF    | ENSG00000270820 | 2        | RP11-355B11.2 | 2.553583e-04 | 1.763643e-14  | 9.646563e-04 | 9.357922e-01 | 20         |
| HF    | ENSG00000261613 | 16       | RP11-20I23.13 | 1.667478e-03 | 2.589742e-74  | 1.947214e-03 | 9.228670e-01 | 20         |
| HF    | ENSG00000187134 | 10       | AKR1C1        | 6.746834e-03 | 9.998317e-48  | 7.742334e-03 | 9.157545e-01 | 20         |
| HF    | ENSG00000088766 | 20       | CRLS1         | 3.457403e-03 | 3.481943e-09  | 8.782086e-03 | 8.807259e-01 | 9          |
| HF    | ENSG00000099769 | 16       | IGFALS        | 1.395950e-03 | 3.746349e-08  | 5.721638e-03 | 8.665292e-01 | 6          |
| HF    | ENSG00000101751 | 18       | POLI          | 8.364885e-03 | 2.196515e-43  | 9.592015e-03 | 8.584238e-01 | 20         |
| HF    | ENSG00000174606 | 1        | ANGEL2        | 1.190529e-03 | 1.725490e-15  | 2.683511e-03 | 8.213179e-01 | 20         |
| HF    | ENSG00000229314 | 9        | ORM1          | 5.797623e-03 | 4.413328e-32  | 7.221529e-03 | 8.035767e-01 | 20         |
| HF    | ENSG00000167525 | 17       | PROCA1        | 6.513434e-03 | 4.495303e-31  | 8.078037e-03 | 7.970937e-01 | 20         |
| HF    | ENSG00000115137 | 2        | DNAJC27       | 2.606574e-03 | 1.691306e-40  | 3.317610e-03 | 7.893915e-01 | 20         |
| HF    | ENSG00000108785 | 17       | HSD17B1P1     | 8.098601e-04 | 5.956266e-12  | 2.599011e-03 | 7.795524e-01 | 20         |
| HF    | ENSG00000231887 | 12       | PRH1          | 1.575869e-03 | 9.431576e-35  | 2.206747e-03 | 7.767840e-01 | 20         |
| HF    | ENSG00000148426 | 10       | PROSER2       | 5.878276e-03 | 1.084901e-22  | 8.005687e-03 | 7.459196e-01 | 20         |
| HF    | ENSG00000132623 | 20       | ANKEF1        | 4.158340e-04 | 1.173065e-19  | 1.003329e-03 | 7.411164e-01 | 16         |
| HF    | ENSG00000255837 | 12       | TAS2R20       | 1.583215e-03 | 6.113526e-15  | 3.410805e-03 | 7.320292e-01 | 20         |
| HF    | ENSG00000145979 | 6        | TBC1D7        | 3.258967e-03 | 7.082681e-56  | 3.825958e-03 | 7.126120e-01 | 20         |
| HF    | ENSG00000273302 | 2        | RP11-493E12.2 | 3.625434e-04 | 5.874668e-10  | 1.998984e-03 | 7.021065e-01 | 20         |
| HF    | ENSG00000260565 | 16       | ERVK13-1      | 2.227666e-03 | 1.165310e-49  | 2.744761e-03 | 6.979014e-01 | 20         |
| HF    | ENSG00000100036 | 22       | SLC35E4       | 3.104631e-03 | 4.695391e-10  | 7.552834e-03 | 6.939695e-01 | 16         |
| HF    | ENSG00000103184 | 16       | SEC14L5       | 2.050832e-03 | 1.349895e-38  | 2.704154e-03 | 6.722165e-01 | 20         |
| HF    | ENSG00000111215 | 12       | PRR4          | 5.014643e-04 | 6.799589e-32  | 8.474879e-04 | 6.463410e-01 | 20         |
| HF    | ENSG00000148450 | 10       | MSRB2         | 6.626741e-03 | 1.833948e-20  | 9.170488e-03 | 6.291955e-01 | 12         |
| HF    | ENSG00000106638 | 7        | TBL2          | 2.847213e-04 | 4.978499e-14  | 1.078314e-03 | 6.067562e-01 | 4          |
| HF    | ENSG00000129595 | 5        | EPB41L4A      | 7.022633e-04 | 2.352604e-10  | 2.806054e-03 | 5.956661e-01 | 9          |

|    |                 |                 |              |               |              |              |    |
|----|-----------------|-----------------|--------------|---------------|--------------|--------------|----|
| HF | ENSG00000143502 | 1 SUSD4         | 2.895210e-04 | 4.158257e-13  | 1.186966e-03 | 5.913212e-01 | 8  |
| HF | ENSG00000123268 | 12 ATF1         | 4.058635e-03 | 6.933215e-28  | 5.445723e-03 | 5.767840e-01 | 20 |
| HF | ENSG00000228278 | 9 ORM2          | 5.797623e-03 | 2.635959e-18  | 8.521639e-03 | 5.514786e-01 | 20 |
| HF | ENSG00000255050 | 8 RP11-661A12.9 | 7.019400e-03 | 1.464347e-76  | 7.634727e-03 | 5.320442e-01 | 20 |
| HF | ENSG00000160991 | 7 ORAI2         | 9.045446e-03 | 1.433552e-95  | 9.599948e-03 | 5.274675e-01 | 20 |
| HF | ENSG00000147813 | 8 NAPRT1        | 7.019400e-03 | 6.686518e-98  | 7.495555e-03 | 5.187467e-01 | 20 |
| HF | ENSG00000108799 | 17 EZH1         | 1.062796e-03 | 3.916743e-11  | 3.355483e-03 | 4.986307e-01 | 5  |
| HF | ENSG00000135341 | 6 MAP3K7        | 5.008988e-03 | 1.215431e-12  | 9.050220e-03 | 4.852506e-01 | 20 |
| HF | ENSG00000183049 | 10 CAMK1D       | 4.459539e-03 | 5.117063e-27  | 5.971094e-03 | 4.830553e-01 | 20 |
| HF | ENSG00000144021 | 2 CIAO1         | 5.089206e-03 | 4.383897e-47  | 5.961825e-03 | 4.818146e-01 | 20 |
| HF | ENSG00000138399 | 2 FASTKD1       | 6.170921e-06 | 6.869787e-17  | 7.030760e-05 | 4.522902e-01 | 20 |
| HF | ENSG00000247157 | 12 RP11-434C1.1 | 1.134227e-03 | 3.988650e-57  | 1.427411e-03 | 4.465888e-01 | 17 |
| HF | ENSG00000198885 | 2 ITPRIPL1      | 5.500093e-03 | 2.347894e-25  | 7.310400e-03 | 4.346909e-01 | 20 |
| HF | ENSG00000100029 | 22 PES1         | 3.266931e-03 | 1.363553e-30  | 4.376494e-03 | 4.133499e-01 | 20 |
| HF | ENSG00000108852 | 17 MPP2         | 4.304671e-03 | 1.075519e-11  | 8.485407e-03 | 3.609989e-01 | 13 |
| HF | ENSG00000212127 | 12 TAS2R14      | 1.134227e-03 | 5.127722e-16  | 2.522284e-03 | 3.369015e-01 | 20 |
| HF | ENSG00000204347 | 17 BTBD17       | 3.168765e-03 | 8.398796e-15  | 5.811072e-03 | 3.301470e-01 | 20 |
| HF | ENSG00000051596 | 5 THOC3         | 4.330619e-03 | 2.136003e-28  | 5.736370e-03 | 2.999982e-01 | 7  |
| HF | ENSG00000004534 | 3 RBM6          | 7.582458e-03 | 1.033104e-130 | 7.949770e-03 | 2.928397e-01 | 20 |
| HF | ENSG00000128245 | 22 YWHAH        | 3.262496e-03 | 9.070730e-18  | 5.385500e-03 | 2.792507e-01 | 20 |
| HF | ENSG00000117862 | 1 TXNDC12       | 5.498826e-03 | 7.498897e-27  | 7.193646e-03 | 2.703934e-01 | 20 |
| HF | ENSG00000165138 | 9 ANKS6         | 2.296466e-03 | 1.039769e-10  | 5.826804e-03 | 2.390420e-01 | 8  |
| HF | ENSG00000212978 | 2 AC016747.3    | 1.202154e-03 | 3.145289e-21  | 2.185616e-03 | 2.356703e-01 | 20 |
| HF | ENSG00000176083 | 1 ZNF683        | 4.515127e-04 | 1.566262e-08  | 2.874073e-03 | 2.203078e-01 | 5  |
| HF | ENSG00000108786 | 17 HSD17B1      | 2.917293e-03 | 2.686161e-19  | 4.724656e-03 | 2.051224e-01 | 14 |
| HF | ENSG00000197520 | 1 FAM177B       | 5.457704e-03 | 3.173838e-23  | 7.453725e-03 | 2.016664e-01 | 20 |
| HF | ENSG00000183762 | 22 KREMEN1      | 6.471277e-03 | 6.997850e-30  | 8.100648e-03 | 1.970183e-01 | 20 |
| HF | ENSG00000170892 | 19 TSEN34       | 2.772873e-03 | 4.727255e-08  | 8.692325e-03 | 1.674951e-01 | 5  |
| HF | ENSG00000172594 | 6 SMPDL3A       | 2.336361e-03 | 1.633683e-14  | 4.662391e-03 | 1.633696e-01 | 5  |
| HF | ENSG00000135587 | 6 SMPD2         | 1.531969e-03 | 2.335480e-52  | 1.921257e-03 | 1.584247e-01 | 20 |

|     |                 |                 |              |               |              |              |    |
|-----|-----------------|-----------------|--------------|---------------|--------------|--------------|----|
| HF  | ENSG00000196275 | 7 GTF2IRD2      | 2.011685e-03 | 1.255090e-26  | 3.007534e-03 | 1.065403e-01 | 20 |
| HF  | ENSG00000260910 | 13 LINC00565    | 7.476873e-03 | 2.815221e-25  | 9.588119e-03 | 9.074448e-02 | 20 |
| HF  | ENSG00000149577 | 11 SIDT2        | 6.071556e-03 | 1.077318e-70  | 6.692019e-03 | 7.684180e-02 | 20 |
| HF  | ENSG00000237651 | 2 C2orf74       | 8.245557e-03 | 3.326046e-46  | 9.384415e-03 | 6.254923e-02 | 20 |
| HF  | ENSG00000165684 | 9 SNAPC4        | 2.829632e-03 | 3.172661e-35  | 3.701540e-03 | 5.964843e-02 | 18 |
| HF  | ENSG00000189241 | 6 TSPYL1        | 6.456840e-05 | 1.252840e-08  | 1.074267e-03 | 5.664293e-02 | 5  |
| CHD | ENSG00000197165 | 16 SULT1A2      | 8.354299e-03 | 9.980991e-124 | 8.762536e-03 | 9.967917e-01 | 20 |
| CHD | ENSG00000183520 | 1 UTP11L        | 7.799019e-05 | 1.609773e-10  | 7.769336e-04 | 9.912373e-01 | 11 |
| CHD | ENSG00000121933 | 1 ADORA3        | 5.140792e-03 | 2.798761e-48  | 5.994358e-03 | 9.809958e-01 | 20 |
| CHD | ENSG00000151164 | 12 RAD9B        | 4.748539e-06 | 2.146602e-18  | 5.020486e-05 | 9.761854e-01 | 20 |
| CHD | ENSG00000138303 | 10 ASCC1        | 5.560451e-03 | 4.675821e-15  | 8.953326e-03 | 9.645022e-01 | 14 |
| CHD | ENSG00000140463 | 15 BBS4         | 2.514606e-04 | 8.261672e-27  | 5.315239e-04 | 9.580497e-01 | 20 |
| CHD | ENSG00000118197 | 1 DDX59         | 2.533553e-03 | 2.763281e-15  | 4.796132e-03 | 9.539133e-01 | 10 |
| CHD | ENSG00000111237 | 12 VPS29        | 6.198834e-06 | 6.445495e-15  | 9.233741e-05 | 9.538005e-01 | 12 |
| CHD | ENSG00000168275 | 1 COA6          | 2.441799e-03 | 7.731933e-53  | 2.951617e-03 | 9.467738e-01 | 20 |
| CHD | ENSG00000114735 | 3 HEMK1         | 3.076026e-04 | 6.802882e-09  | 2.187686e-03 | 9.276428e-01 | 12 |
| CHD | ENSG00000169609 | 15 C15orf40     | 3.785908e-03 | 1.334218e-23  | 5.410338e-03 | 9.270614e-01 | 20 |
| CHD | ENSG00000151715 | 11 TMEM45B      | 8.056752e-05 | 1.174353e-63  | 1.235508e-04 | 9.244131e-01 | 20 |
| CHD | ENSG00000153774 | 16 CFDP1        | 2.081421e-03 | 1.041082e-28  | 3.009679e-03 | 9.122696e-01 | 20 |
| CHD | ENSG00000237135 | 10 DDX10P1      | 1.477100e-03 | 3.688795e-24  | 2.416931e-03 | 8.980227e-01 | 20 |
| CHD | ENSG00000143156 | 1 NME7          | 2.442924e-03 | 1.260080e-12  | 5.319621e-03 | 8.980034e-01 | 20 |
| CHD | ENSG00000100296 | 22 THOC5        | 4.559739e-03 | 5.157231e-25  | 6.231179e-03 | 8.851522e-01 | 20 |
| CHD | ENSG00000159110 | 21 IFNAR2       | 1.908095e-03 | 4.339182e-08  | 6.922538e-03 | 8.754128e-01 | 3  |
| CHD | ENSG00000175470 | 10 PPP2R2D      | 5.346998e-03 | 6.725112e-21  | 7.583203e-03 | 8.613578e-01 | 13 |
| CHD | ENSG00000072310 | 17 SREBF1       | 5.876382e-04 | 3.025365e-36  | 9.144470e-04 | 8.586554e-01 | 20 |
| CHD | ENSG00000160961 | 19 ZNF333       | 3.158639e-03 | 7.051271e-35  | 4.096590e-03 | 8.561247e-01 | 20 |
| CHD | ENSG00000152404 | 11 CWF19L2      | 1.226027e-03 | 9.029590e-19  | 2.394312e-03 | 8.263208e-01 | 20 |
| CHD | ENSG00000198467 | 9 TPM2          | 1.588656e-04 | 6.134834e-25  | 3.903857e-04 | 8.152139e-01 | 20 |
| CHD | ENSG00000261000 | 1 RP11-534L20.5 | 4.377136e-03 | 4.692758e-68  | 4.918770e-03 | 7.994573e-01 | 20 |
| CHD | ENSG00000180370 | 3 PAK2          | 2.695566e-04 | 6.808970e-12  | 1.292671e-03 | 7.838270e-01 | 3  |

|                     |                  |              |               |              |              |    |
|---------------------|------------------|--------------|---------------|--------------|--------------|----|
| CHD ENSG00000163931 | 3 TKT            | 3.548951e-03 | 4.450171e-28  | 4.829920e-03 | 7.630339e-01 | 20 |
| CHD ENSG00000181381 | 4 DDX60L         | 7.766047e-04 | 5.117110e-19  | 1.662435e-03 | 7.412346e-01 | 20 |
| CHD ENSG00000168807 | 16 SNTB2         | 1.085600e-03 | 3.527858e-16  | 2.421991e-03 | 7.378442e-01 | 17 |
| CHD ENSG00000169612 | 15 FAM103A1      | 5.024467e-03 | 1.190549e-12  | 9.067685e-03 | 7.250625e-01 | 4  |
| CHD ENSG00000267082 | 19 CTC-510F12.2  | 4.440685e-03 | 1.906715e-23  | 6.219110e-03 | 7.169835e-01 | 7  |
| CHD ENSG00000117595 | 1 IRF6           | 6.217703e-03 | 1.825841e-44  | 7.248451e-03 | 7.034220e-01 | 20 |
| CHD ENSG00000162757 | 1 C1orf74        | 5.539238e-03 | 3.020916e-14  | 9.169760e-03 | 7.000170e-01 | 10 |
| CHD ENSG00000270000 | 14 RP3-449M8.9   | 4.255984e-03 | 4.768220e-17  | 6.812078e-03 | 6.919715e-01 | 15 |
| CHD ENSG00000005243 | 17 COPZ2         | 2.188014e-03 | 1.668861e-08  | 7.095135e-03 | 6.852171e-01 | 6  |
| CHD ENSG00000182621 | 20 PLCB1         | 1.536243e-03 | 9.553153e-28  | 2.347842e-03 | 6.851311e-01 | 20 |
| CHD ENSG00000259005 | 14 RP3-449M8.6   | 4.217159e-03 | 6.723843e-19  | 6.458754e-03 | 6.770266e-01 | 11 |
| CHD ENSG00000160712 | 1 IL6R           | 5.591393e-03 | 1.339061e-16  | 8.606470e-03 | 6.689979e-01 | 7  |
| CHD ENSG00000260766 | 1 RP11-226L15.5  | 1.661652e-03 | 2.685129e-29  | 2.457609e-03 | 6.525848e-01 | 9  |
| CHD ENSG00000143951 | 2 WDPCP          | 3.521681e-03 | 8.088071e-13  | 6.886178e-03 | 6.345509e-01 | 18 |
| CHD ENSG00000141452 | 18 C18orf8       | 3.421370e-03 | 2.646057e-14  | 6.291157e-03 | 6.292649e-01 | 12 |
| CHD ENSG00000143315 | 1 PIGM           | 1.661652e-03 | 1.555217e-33  | 2.340380e-03 | 6.197320e-01 | 9  |
| CHD ENSG00000142599 | 1 RERE           | 5.476083e-03 | 8.845712e-52  | 6.294744e-03 | 6.095442e-01 | 20 |
| CHD ENSG00000143297 | 1 FCRL5          | 5.519249e-03 | 2.618713e-76  | 6.063428e-03 | 5.885159e-01 | 20 |
| CHD ENSG00000272914 | 10 RP11-330O11.3 | 7.822760e-04 | 1.033559e-11  | 2.597193e-03 | 5.708883e-01 | 15 |
| CHD ENSG00000004534 | 3 RBM6           | 4.629989e-04 | 1.033104e-130 | 5.290030e-04 | 5.633752e-01 | 20 |
| CHD ENSG00000117597 | 1 DIEXF          | 5.963483e-03 | 1.037141e-36  | 7.207332e-03 | 5.499256e-01 | 20 |
| CHD ENSG00000101294 | 20 HM13          | 7.602738e-03 | 7.755235e-52  | 8.570225e-03 | 5.277942e-01 | 20 |
| CHD ENSG00000105072 | 19 C19orf44      | 4.270808e-04 | 2.731776e-13  | 1.507391e-03 | 5.188543e-01 | 3  |
| CHD ENSG00000162066 | 16 AMDHD2        | 1.299421e-03 | 1.020672e-08  | 5.043498e-03 | 5.182615e-01 | 5  |
| CHD ENSG00000139323 | 12 POC1B         | 1.565525e-03 | 1.791407e-10  | 4.608697e-03 | 5.027260e-01 | 9  |
| CHD ENSG00000130479 | 19 MAP1S         | 2.050218e-03 | 7.909072e-12  | 4.944852e-03 | 5.020886e-01 | 6  |
| CHD ENSG00000235944 | 7 ZNF815P        | 2.164213e-03 | 3.535200e-14  | 4.472925e-03 | 4.877585e-01 | 16 |
| CHD ENSG00000143384 | 1 MCL1           | 3.203834e-03 | 2.313062e-14  | 5.967469e-03 | 4.791389e-01 | 9  |
| CHD ENSG00000234465 | 19 PINLYP        | 1.716327e-03 | 4.447136e-08  | 6.518884e-03 | 4.764372e-01 | 5  |
| CHD ENSG00000075234 | 22 TTC38         | 6.332133e-03 | 3.022742e-46  | 7.329209e-03 | 4.627399e-01 | 20 |

|                     |                  |              |              |              |              |    |
|---------------------|------------------|--------------|--------------|--------------|--------------|----|
| CHD ENSG00000213231 | 14 TCL1B         | 2.559588e-03 | 1.951577e-08 | 7.877704e-03 | 4.605115e-01 | 5  |
| CHD ENSG00000182504 | 3 CEP97          | 3.981347e-03 | 4.717221e-10 | 8.954053e-03 | 4.567208e-01 | 18 |
| CHD ENSG00000197256 | 19 KANK2         | 4.440685e-03 | 1.656585e-29 | 5.804077e-03 | 4.560158e-01 | 20 |
| CHD ENSG00000125877 | 20 ITPA          | 4.334111e-03 | 2.722550e-54 | 5.020046e-03 | 4.532335e-01 | 20 |
| CHD ENSG00000130475 | 19 FCHO1         | 3.615930e-04 | 1.750045e-43 | 5.530956e-04 | 4.520711e-01 | 20 |
| CHD ENSG00000137547 | 8 MRPL15         | 3.577009e-03 | 1.105980e-08 | 9.449109e-03 | 4.259064e-01 | 9  |
| CHD ENSG00000131143 | 16 COX4I1        | 4.030232e-03 | 1.875248e-10 | 8.763160e-03 | 4.240929e-01 | 13 |
| CHD ENSG00000106460 | 7 TMEM106B       | 2.134027e-03 | 6.775056e-32 | 2.966523e-03 | 4.186694e-01 | 20 |
| CHD ENSG00000106638 | 7 TBL2           | 2.155659e-05 | 4.978499e-14 | 2.153738e-04 | 4.172806e-01 | 4  |
| CHD ENSG00000257594 | 12 GALNT4        | 1.469806e-03 | 7.221129e-11 | 4.259598e-03 | 3.773809e-01 | 6  |
| CHD ENSG00000136271 | 7 DDX56          | 5.130858e-05 | 3.359456e-10 | 6.650894e-04 | 3.768493e-01 | 11 |
| CHD ENSG00000228302 | 10 RP11-186N15.3 | 5.953056e-03 | 5.176047e-14 | 9.784946e-03 | 3.712467e-01 | 20 |
| CHD ENSG00000272368 | 12 RP4-605O3.4   | 6.784377e-04 | 2.471050e-19 | 1.479562e-03 | 3.621896e-01 | 20 |
| CHD ENSG00000135378 | 11 PRRG4         | 2.632692e-03 | 1.614940e-13 | 5.351012e-03 | 3.566462e-01 | 8  |
| CHD ENSG00000167378 | 19 IRGQ          | 4.863848e-05 | 2.629628e-08 | 1.034758e-03 | 3.552535e-01 | 10 |
| CHD ENSG00000142208 | 14 AKT1          | 8.957978e-04 | 1.020069e-11 | 2.838362e-03 | 3.408474e-01 | 8  |
| CHD ENSG00000215067 | 17 AC027763.2    | 4.655861e-03 | 6.308412e-14 | 8.102069e-03 | 3.366091e-01 | 13 |
| CHD ENSG00000198270 | 12 TMEM116       | 1.258896e-04 | 4.383078e-20 | 4.030848e-04 | 3.344894e-01 | 14 |
| CHD ENSG00000166507 | 10 NDST2         | 1.428335e-03 | 2.177002e-16 | 2.952627e-03 | 3.162211e-01 | 16 |
| CHD ENSG00000139190 | 12 VAMP1         | 7.920270e-03 | 4.182624e-58 | 8.794913e-03 | 2.810757e-01 | 20 |
| CHD ENSG00000083097 | 6 DOPEY1         | 7.583156e-03 | 1.799578e-41 | 8.811348e-03 | 2.663701e-01 | 20 |
| CHD ENSG00000174080 | 11 CTSF          | 6.324410e-03 | 2.407775e-37 | 7.582141e-03 | 2.623166e-01 | 20 |
| CHD ENSG00000228486 | 2 AC017099.3     | 5.370936e-03 | 2.060501e-18 | 7.978231e-03 | 2.594774e-01 | 4  |
| CHD ENSG00000170322 | 11 NFRKB         | 8.056752e-05 | 6.685603e-46 | 1.450199e-04 | 2.552451e-01 | 20 |
| CHD ENSG00000167306 | 18 MYO5B         | 5.645859e-03 | 7.273167e-15 | 9.118573e-03 | 2.469069e-01 | 13 |
| CHD ENSG00000002016 | 12 RAD52         | 6.807380e-03 | 4.432093e-31 | 8.406440e-03 | 2.338402e-01 | 18 |
| CHD ENSG00000267077 | 16 RP11-127I20.5 | 6.005373e-03 | 1.726453e-33 | 7.387106e-03 | 2.251784e-01 | 20 |
| CHD ENSG00000205517 | 19 RGL3          | 3.801719e-03 | 5.247091e-16 | 6.417485e-03 | 1.978493e-01 | 12 |
| CHD ENSG00000149243 | 11 KLHL35        | 1.843869e-03 | 4.048396e-38 | 2.466222e-03 | 1.962110e-01 | 20 |
| CHD ENSG00000066084 | 12 DIP2B         | 3.174022e-04 | 6.510834e-35 | 5.477110e-04 | 1.887991e-01 | 20 |

|                     |                  |              |               |              |              |    |
|---------------------|------------------|--------------|---------------|--------------|--------------|----|
| CHD ENSG00000176472 | 19 ZNF575        | 8.412208e-04 | 6.410458e-16  | 2.029524e-03 | 1.877345e-01 | 15 |
| CHD ENSG00000009790 | 1 TRAF3IP3       | 4.627218e-03 | 1.518108e-30  | 5.966786e-03 | 1.819884e-01 | 20 |
| CHD ENSG00000100297 | 22 MCM5          | 5.777900e-03 | 2.731002e-25  | 7.638900e-03 | 1.788761e-01 | 13 |
| CHD ENSG00000172785 | 9 CBWD1          | 2.042208e-03 | 2.098539e-37  | 2.717496e-03 | 1.722481e-01 | 20 |
| CHD ENSG00000119965 | 10 C10orf88      | 8.582820e-04 | 1.855947e-11  | 2.827871e-03 | 1.643505e-01 | 9  |
| CHD ENSG00000073050 | 19 XRCC1         | 4.749742e-04 | 4.434038e-20  | 1.091717e-03 | 1.584624e-01 | 20 |
| CHD ENSG00000172954 | 2 LCLAT1         | 3.054429e-03 | 9.698055e-26  | 4.362022e-03 | 1.431827e-01 | 20 |
| CHD ENSG00000164236 | 5 ANKRD33B       | 4.758609e-04 | 8.072519e-20  | 1.104708e-03 | 1.396825e-01 | 4  |
| CHD ENSG00000168890 | 2 TMEM150A       | 4.295364e-04 | 2.596516e-08  | 2.921585e-03 | 1.384738e-01 | 6  |
| CHD ENSG00000162398 | 1 C1orf177       | 3.833628e-03 | 7.790943e-16  | 6.496305e-03 | 1.380782e-01 | 20 |
| CHD ENSG00000135919 | 2 SERPINE2       | 8.083324e-07 | 2.759686e-22  | 1.091485e-05 | 1.340400e-01 | 15 |
| CHD ENSG00000197520 | 1 FAM177B        | 1.240881e-04 | 3.173838e-23  | 3.439462e-04 | 1.176321e-01 | 20 |
| CHD ENSG00000271751 | 11 RP11-110I1.14 | 5.792686e-05 | 2.452686e-12  | 4.874980e-04 | 1.154600e-01 | 9  |
| CHD ENSG00000158604 | 7 TMED4          | 6.694220e-05 | 9.140515e-11  | 6.843602e-04 | 1.105212e-01 | 6  |
| CHD ENSG00000234553 | 5 AC022431.3     | 6.011461e-03 | 6.623799e-14  | 9.898046e-03 | 1.057611e-01 | 5  |
| CHD ENSG00000214975 | 6 PPIAP29        | 6.206975e-03 | 3.731902e-18  | 9.049184e-03 | 9.907829e-02 | 20 |
| CHD ENSG00000143498 | 1 TAF1A          | 6.591587e-04 | 3.003654e-13  | 2.027487e-03 | 9.851495e-02 | 17 |
| CHD ENSG00000166471 | 11 TMEM41B       | 3.826837e-03 | 7.462441e-29  | 5.119621e-03 | 8.959861e-02 | 20 |
| CHD ENSG00000159352 | 1 PSMD4          | 5.167256e-05 | 2.427129e-11  | 5.369305e-04 | 7.367028e-02 | 11 |
| CHD ENSG00000182179 | 3 UBA7           | 3.525900e-03 | 1.781217e-61  | 4.060897e-03 | 7.132748e-02 | 20 |
| CHD ENSG00000227550 | 7 TRBV7-5        | 1.629296e-03 | 3.348882e-10  | 4.858670e-03 | 6.777436e-02 | 4  |
| CHD ENSG00000225940 | 5 AC022431.2     | 6.011461e-03 | 4.924356e-21  | 8.361620e-03 | 6.522912e-02 | 11 |
| CHD ENSG00000123268 | 12 ATF1          | 3.139496e-05 | 6.933215e-28  | 9.974139e-05 | 6.499100e-02 | 20 |
| HTN ENSG00000173338 | 11 KCNK7         | 7.900053e-06 | 7.672167e-09  | 4.097497e-04 | 9.970476e-01 | 3  |
| HTN ENSG00000157322 | 16 CLEC18A       | 1.600000e-04 | 1.696855e-116 | 1.987929e-04 | 9.891470e-01 | 20 |
| HTN ENSG00000234719 | 16 RP11-166B2.1  | 1.199997e-03 | 4.744435e-94  | 1.364146e-03 | 9.845290e-01 | 20 |
| HTN ENSG00000129625 | 5 REEP5          | 8.099906e-03 | 8.548319e-29  | 9.972032e-03 | 9.830344e-01 | 20 |
| HTN ENSG00000233885 | 3 YEATS2-AS1     | 2.999991e-05 | 8.696857e-10  | 5.567331e-04 | 9.823549e-01 | 20 |
| HTN ENSG00000165626 | 10 BEND7         | 2.000000e-03 | 2.832161e-10  | 5.434862e-03 | 9.740188e-01 | 12 |
| HTN ENSG00000267082 | 19 CTC-510F12.2  | 4.200007e-06 | 1.906715e-23  | 2.914943e-05 | 9.672515e-01 | 7  |

|     |                 |                   |              |              |              |              |    |
|-----|-----------------|-------------------|--------------|--------------|--------------|--------------|----|
| HTN | ENSG00000161016 | 8 RPL8            | 1.899984e-03 | 2.065987e-82 | 2.151845e-03 | 9.614715e-01 | 20 |
| HTN | ENSG00000170571 | 5 EMB             | 1.499996e-03 | 4.040105e-36 | 2.140488e-03 | 9.573532e-01 | 10 |
| HTN | ENSG00000124104 | 20 SNX21          | 2.300011e-03 | 3.157636e-14 | 4.670493e-03 | 9.450849e-01 | 20 |
| HTN | ENSG00000124767 | 6 GLO1            | 5.899973e-03 | 1.831813e-15 | 9.267745e-03 | 9.310537e-01 | 20 |
| HTN | ENSG00000204160 | 1 ZDHC1           | 4.200007e-05 | 1.769403e-21 | 1.682404e-04 | 9.305609e-01 | 20 |
| HTN | ENSG00000146247 | 6 PHIP            | 2.000000e-03 | 3.337376e-13 | 4.458501e-03 | 9.273061e-01 | 19 |
| HTN | ENSG00000212127 | 12 TAS2R14        | 5.999983e-03 | 5.127722e-16 | 9.205214e-03 | 9.264917e-01 | 20 |
| HTN | ENSG00000143570 | 1 SLC39A1         | 1.700004e-04 | 4.357722e-16 | 6.419731e-04 | 9.263584e-01 | 20 |
| HTN | ENSG00000233232 | 16 NPIP7          | 3.699985e-04 | 9.931134e-25 | 7.738099e-04 | 9.227954e-01 | 20 |
| HTN | ENSG00000212978 | 2 AC016747.3      | 5.000000e-03 | 3.145289e-21 | 7.099578e-03 | 9.194907e-01 | 20 |
| HTN | ENSG00000120860 | 12 CCDC53         | 5.000000e-03 | 4.598636e-29 | 6.493882e-03 | 8.661433e-01 | 20 |
| HTN | ENSG0000037637  | 1 FBXO42          | 3.200000e-03 | 3.202344e-08 | 9.296000e-03 | 8.541878e-01 | 4  |
| HTN | ENSG00000163472 | 1 TMEM79          | 4.799986e-03 | 1.984143e-58 | 5.511090e-03 | 8.533581e-01 | 20 |
| HTN | ENSG00000258919 | 14 RP11-1029J19.4 | 6.299992e-03 | 1.151175e-22 | 8.546357e-03 | 8.486568e-01 | 12 |
| HTN | ENSG00000075568 | 2 TMEM131         | 4.600023e-03 | 4.159758e-10 | 9.873792e-03 | 8.338566e-01 | 7  |
| HTN | ENSG00000111725 | 12 PRKAB1         | 5.899973e-03 | 8.247375e-39 | 7.086315e-03 | 8.246575e-01 | 20 |
| HTN | ENSG00000141068 | 17 KSR1           | 8.000000e-03 | 6.815342e-53 | 8.923915e-03 | 8.182241e-01 | 20 |
| HTN | ENSG00000111490 | 12 TBC1D30        | 1.199997e-03 | 9.822925e-22 | 2.196522e-03 | 8.022640e-01 | 13 |
| HTN | ENSG00000196378 | 8 ZNF34           | 4.600023e-04 | 7.187009e-25 | 9.176853e-04 | 8.022234e-01 | 20 |
| HTN | ENSG00000054282 | 1 SDCCAG8         | 9.699961e-04 | 1.657389e-55 | 1.247023e-03 | 7.965002e-01 | 20 |
| HTN | ENSG00000213083 | 2 AC010731.6      | 4.799986e-03 | 5.255574e-12 | 9.027979e-03 | 7.929281e-01 | 7  |
| HTN | ENSG00000241973 | 22 PI4KA          | 1.299990e-03 | 2.158692e-10 | 4.102771e-03 | 7.898914e-01 | 16 |
| HTN | ENSG00000223508 | 8 RPL23AP53       | 4.499974e-04 | 1.868257e-13 | 1.532864e-03 | 7.871764e-01 | 20 |
| HTN | ENSG00000183605 | 10 SFXN4          | 5.699936e-05 | 1.485788e-65 | 9.004138e-05 | 7.871618e-01 | 20 |
| HTN | ENSG00000180537 | 6 RNF182          | 4.399973e-03 | 2.205109e-84 | 4.873966e-03 | 7.812446e-01 | 20 |
| HTN | ENSG00000135677 | 12 GNS            | 2.399993e-03 | 7.888983e-20 | 4.032465e-03 | 7.740479e-01 | 10 |
| HTN | ENSG00000148824 | 10 MTG1           | 8.600031e-03 | 4.965420e-41 | 9.948189e-03 | 7.724842e-01 | 20 |
| HTN | ENSG00000178904 | 19 DPY19L3        | 1.600000e-03 | 5.178674e-38 | 2.113942e-03 | 7.708501e-01 | 20 |
| HTN | ENSG00000127528 | 19 KLF2           | 1.499996e-03 | 4.015286e-09 | 5.104575e-03 | 7.623557e-01 | 7  |
| HTN | ENSG00000205583 | 7 STAG3L1         | 3.799969e-07 | 4.403875e-34 | 2.788621e-06 | 7.589217e-01 | 17 |

|     |                 |                  |              |              |              |              |    |
|-----|-----------------|------------------|--------------|--------------|--------------|--------------|----|
| HTN | ENSG00000131446 | 5 MGAT1          | 2.800013e-04 | 6.897417e-12 | 1.319331e-03 | 7.574975e-01 | 4  |
| HTN | ENSG00000060138 | 12 YBX3          | 1.299990e-03 | 1.005439e-08 | 4.999699e-03 | 7.565634e-01 | 6  |
| HTN | ENSG00000169223 | 5 LMAN2          | 2.800013e-03 | 1.538059e-10 | 6.843921e-03 | 7.500520e-01 | 14 |
| HTN | ENSG00000239697 | 17 TNFSF12       | 6.900014e-03 | 3.638870e-31 | 8.503995e-03 | 7.488889e-01 | 20 |
| HTN | ENSG00000143156 | 1 NME7           | 7.399971e-05 | 1.260080e-12 | 5.392560e-04 | 7.418874e-01 | 19 |
| HTN | ENSG00000063438 | 5 AHRR           | 4.600023e-03 | 4.482348e-11 | 9.234095e-03 | 7.388070e-01 | 20 |
| HTN | ENSG00000104320 | 8 NBN            | 1.000000e-03 | 7.455882e-09 | 4.322641e-03 | 7.369493e-01 | 12 |
| HTN | ENSG00000011523 | 2 CEP68          | 1.799990e-05 | 1.604083e-37 | 4.884062e-05 | 7.365030e-01 | 20 |
| HTN | ENSG00000247157 | 12 RP11-434C1.1  | 5.999983e-03 | 3.988650e-57 | 6.729175e-03 | 7.364075e-01 | 20 |
| HTN | ENSG00000268535 | 19 RP11-420K14.3 | 4.600023e-03 | 2.833170e-88 | 5.074581e-03 | 7.312302e-01 | 20 |
| HTN | ENSG00000223705 | 7 NSUN5P1        | 4.099964e-07 | 9.385212e-26 | 5.103955e-06 | 7.211662e-01 | 15 |
| HTN | ENSG00000105048 | 19 TNNT1         | 2.399993e-03 | 1.275955e-29 | 3.406721e-03 | 7.186557e-01 | 20 |
| HTN | ENSG00000186026 | 19 ZNF284        | 6.199976e-03 | 2.036639e-24 | 8.150256e-03 | 7.099030e-01 | 20 |
| HTN | ENSG00000120899 | 8 PTK2B          | 2.999991e-04 | 1.179909e-16 | 9.132846e-04 | 7.074683e-01 | 16 |
| HTN | ENSG00000198952 | 1 SMG5           | 4.300015e-03 | 0.000000e+00 | 4.373318e-03 | 7.037483e-01 | 20 |
| HTN | ENSG00000196821 | 6 C6orf106       | 4.399973e-06 | 1.839762e-10 | 1.958241e-04 | 7.006180e-01 | 5  |
| HTN | ENSG00000227355 | 9 RP11-162D16.2  | 1.299990e-03 | 5.401646e-18 | 2.620873e-03 | 6.998622e-01 | 19 |
| HTN | ENSG00000160781 | 1 PAQR6          | 4.300015e-03 | 0.000000e+00 | 4.389956e-03 | 6.994439e-01 | 20 |
| HTN | ENSG00000090621 | 1 PABPC4         | 5.099998e-05 | 3.164500e-11 | 5.437877e-04 | 6.990002e-01 | 20 |
| HTN | ENSG00000203279 | 9 RP11-498P14.5  | 2.199986e-04 | 6.240137e-12 | 1.144256e-03 | 6.978070e-01 | 8  |
| HTN | ENSG00000237513 | 7 RP11-325F22.2  | 3.699985e-03 | 8.989743e-22 | 5.430434e-03 | 6.957213e-01 | 20 |
| HTN | ENSG00000164078 | 3 MST1R          | 6.800017e-05 | 4.894054e-08 | 1.296645e-03 | 6.918567e-01 | 12 |
| HTN | ENSG00000176390 | 17 CRLF3         | 2.599980e-03 | 1.655873e-10 | 6.399116e-03 | 6.829045e-01 | 15 |
| HTN | ENSG00000154328 | 8 NEIL2          | 3.200000e-04 | 4.106138e-20 | 8.104441e-04 | 6.798073e-01 | 20 |
| HTN | ENSG00000079459 | 8 FDFT1          | 6.800017e-05 | 7.046650e-13 | 4.965184e-04 | 6.694769e-01 | 20 |
| HTN | ENSG00000143702 | 1 CEP170         | 1.299990e-03 | 3.225226e-14 | 3.056647e-03 | 6.679782e-01 | 16 |
| HTN | ENSG00000125388 | 4 GRK4           | 2.800013e-04 | 1.581272e-29 | 5.411508e-04 | 6.661043e-01 | 20 |
| HTN | ENSG00000067208 | 1 EVI5           | 2.300011e-03 | 1.502928e-13 | 4.817165e-03 | 6.641281e-01 | 20 |
| HTN | ENSG00000011114 | 14 BTBD7         | 1.199997e-04 | 3.545682e-09 | 1.252655e-03 | 6.562726e-01 | 13 |
| HTN | ENSG00000130638 | 22 ATXN10        | 4.000000e-03 | 1.387952e-23 | 5.696747e-03 | 6.542749e-01 | 20 |

|                     |                 |              |               |              |              |    |
|---------------------|-----------------|--------------|---------------|--------------|--------------|----|
| HTN ENSG00000188227 | 19 ZNF793       | 1.099993e-03 | 2.525881e-19  | 2.108862e-03 | 6.514481e-01 | 20 |
| HTN ENSG00000197128 | 19 ZNF772       | 5.199960e-03 | 3.536414e-22  | 7.297475e-03 | 6.497689e-01 | 17 |
| HTN ENSG00000111642 | 12 CHD4         | 2.100003e-03 | 1.814389e-08  | 6.925006e-03 | 6.417045e-01 | 3  |
| HTN ENSG00000119318 | 9 RAD23B        | 7.599937e-04 | 5.190254e-14  | 2.113494e-03 | 6.382897e-01 | 17 |
| HTN ENSG00000172785 | 9 CBWD1         | 7.799917e-04 | 8.847721e-36  | 1.175338e-03 | 6.352651e-01 | 20 |
| HTN ENSG00000197165 | 16 SULT1A2      | 4.799986e-04 | 9.980991e-124 | 5.493379e-04 | 6.325767e-01 | 20 |
| HTN ENSG00000164741 | 8 DLC1          | 2.500000e-03 | 3.874020e-22  | 3.893081e-03 | 6.257427e-01 | 7  |
| HTN ENSG00000141452 | 18 C18orf8      | 9.299937e-04 | 2.646057e-14  | 2.388094e-03 | 6.152148e-01 | 11 |
| HTN ENSG00000197020 | 19 ZNF100       | 7.399971e-03 | 2.905414e-53  | 8.281110e-03 | 6.100751e-01 | 20 |
| HTN ENSG00000171658 | 3 RP11-443P15.2 | 6.100002e-03 | 1.375299e-31  | 7.536365e-03 | 6.051552e-01 | 20 |
| HTN ENSG00000264538 | 17 SUZ12P       | 2.100003e-04 | 9.846741e-14  | 9.103441e-04 | 5.934187e-01 | 16 |
| HTN ENSG00000261643 | 4 RP11-529E10.6 | 2.300011e-03 | 1.550445e-38  | 3.024246e-03 | 5.931965e-01 | 20 |
| HTN ENSG00000004534 | 3 RBM6          | 2.300011e-05 | 1.033104e-130 | 3.046874e-05 | 5.923982e-01 | 20 |
| HTN ENSG00000198715 | 1 C1orf85       | 4.300015e-03 | 0.000000e+00  | 4.387570e-03 | 5.903143e-01 | 20 |
| HTN ENSG00000102978 | 16 POLR2C       | 3.699985e-04 | 9.468183e-12  | 1.607120e-03 | 5.853227e-01 | 18 |
| HTN ENSG00000175611 | 9 LINC00476     | 1.199997e-03 | 5.785793e-64  | 1.462551e-03 | 5.752181e-01 | 20 |
| HTN ENSG00000162302 | 11 RPS6KA4      | 1.299990e-03 | 1.309384e-40  | 1.710367e-03 | 5.745622e-01 | 20 |
| HTN ENSG00000164331 | 5 ANKRA2        | 1.400006e-03 | 2.225835e-13  | 3.414373e-03 | 5.735836e-01 | 13 |
| HTN ENSG00000170145 | 11 SIK2         | 1.600000e-03 | 2.123679e-15  | 3.360019e-03 | 5.724553e-01 | 20 |
| HTN ENSG00000177302 | 17 TOP3A        | 3.599979e-03 | 3.353602e-11  | 7.755608e-03 | 5.704291e-01 | 9  |
| HTN ENSG00000141076 | 16 CIRH1A       | 9.200046e-04 | 3.318449e-16  | 2.131710e-03 | 5.699697e-01 | 17 |
| HTN ENSG00000165548 | 14 TMEM63C      | 3.299970e-03 | 4.531529e-66  | 3.796231e-03 | 5.694348e-01 | 20 |
| HTN ENSG00000076685 | 10 NT5C2        | 1.199997e-09 | 6.202238e-11  | 8.561912e-06 | 5.652220e-01 | 9  |
| HTN ENSG00000178951 | 19 ZBTB7A       | 6.900014e-04 | 3.924324e-10  | 2.851167e-03 | 5.586581e-01 | 14 |
| HTN ENSG00000225329 | 7 RP11-325F22.5 | 3.699985e-03 | 5.594673e-15  | 6.469330e-03 | 5.474067e-01 | 13 |
| HTN ENSG00000169062 | 13 UPF3A        | 8.799946e-04 | 3.663451e-22  | 1.663440e-03 | 5.409340e-01 | 20 |
| HTN ENSG00000198682 | 10 PAPSS2       | 7.799917e-04 | 1.573598e-10  | 2.936395e-03 | 5.355600e-01 | 11 |
| HTN ENSG00000172367 | 11 PDZD3        | 6.299992e-03 | 1.050678e-24  | 8.319265e-03 | 5.328599e-01 | 20 |
| HTN ENSG00000183506 | 22 PI4KAP2      | 7.900053e-04 | 1.814511e-28  | 1.315983e-03 | 5.328357e-01 | 20 |
| HTN ENSG00000175895 | 8 PLEKHF2       | 1.499996e-03 | 5.197187e-12  | 4.008311e-03 | 5.301505e-01 | 13 |

|     |                 |    |               |              |               |              |              |    |
|-----|-----------------|----|---------------|--------------|---------------|--------------|--------------|----|
| HTN | ENSG00000127124 | 1  | HIVEP3        | 4.300015e-03 | 3.513997e-16  | 7.106545e-03 | 5.239367e-01 | 10 |
| HTN | ENSG00000231160 | 4  | RP11-617D20.1 | 2.800013e-04 | 5.790735e-34  | 4.934277e-04 | 5.210129e-01 | 20 |
| HTN | ENSG00000186583 | 8  | SPATC1        | 3.699985e-03 | 2.980442e-10  | 8.361261e-03 | 5.173531e-01 | 14 |
| HTN | ENSG00000074755 | 17 | ZZEF1         | 1.600000e-05 | 1.644389e-09  | 4.534265e-04 | 5.159439e-01 | 9  |
| HTN | ENSG00000166971 | 16 | AKTIP         | 3.699985e-03 | 8.002608e-11  | 8.093262e-03 | 5.158140e-01 | 8  |
| HTN | ENSG00000071575 | 2  | TRIB2         | 1.099993e-03 | 1.345516e-10  | 3.716473e-03 | 5.144565e-01 | 17 |
| HTN | ENSG00000170949 | 19 | ZNF160        | 2.500000e-03 | 1.870959e-16  | 4.486044e-03 | 5.086530e-01 | 14 |
| HTN | ENSG00000125510 | 20 | OPRL1         | 4.000000e-04 | 1.816165e-32  | 6.950178e-04 | 5.015689e-01 | 20 |
| HTN | ENSG00000089916 | 14 | GPATCH2L      | 2.399993e-04 | 1.077605e-22  | 5.921426e-04 | 4.973456e-01 | 20 |
| HTN | ENSG00000070831 | 1  | CDC42         | 1.899984e-03 | 1.836616e-29  | 2.811728e-03 | 4.947495e-01 | 20 |
| HTN | ENSG00000137815 | 15 | RTF1          | 3.200000e-04 | 1.620132e-10  | 1.727514e-03 | 4.825236e-01 | 20 |
| HTN | ENSG00000257433 | 12 | RP1-197B17.3  | 7.100027e-03 | 9.557661e-31  | 8.702416e-03 | 4.822473e-01 | 20 |
| HTN | ENSG00000246174 | 11 | KCTD21-AS1    | 2.900013e-03 | 1.493416e-69  | 3.326349e-03 | 4.756579e-01 | 20 |
| HTN | ENSG00000196275 | 7  | GTF2IRD2      | 5.399953e-05 | 1.255090e-26  | 1.595092e-04 | 4.747678e-01 | 20 |
| HTN | ENSG00000156931 | 3  | VPS8          | 3.599979e-03 | 3.658645e-20  | 5.553943e-03 | 4.733803e-01 | 20 |
| HTN | ENSG00000181634 | 9  | TNFSF15       | 6.900014e-03 | 3.547995e-18  | 9.931778e-03 | 4.708400e-01 | 18 |
| HTN | ENSG00000205903 | 7  | ZNF316        | 1.099993e-03 | 1.270903e-31  | 1.685065e-03 | 4.684397e-01 | 20 |
| HTN | ENSG00000130177 | 13 | CDC16         | 1.199997e-03 | 4.163735e-131 | 1.341454e-03 | 4.665146e-01 | 20 |
| HTN | ENSG00000242247 | 22 | ARFGAP3       | 3.200000e-03 | 1.561334e-24  | 4.581097e-03 | 4.659483e-01 | 20 |
| HTN | ENSG00000081014 | 15 | AP4E1         | 1.700004e-03 | 2.513599e-21  | 2.907587e-03 | 4.634128e-01 | 20 |
| HTN | ENSG00000109180 | 4  | OCIAD1        | 6.900014e-04 | 5.881175e-12  | 2.339968e-03 | 4.582127e-01 | 20 |
| HTN | ENSG00000116127 | 2  | ALMS1         | 1.700004e-03 | 1.594791e-23  | 2.722008e-03 | 4.572184e-01 | 20 |
| HTN | ENSG00000109519 | 4  | GRPEL1        | 2.100003e-04 | 2.548471e-10  | 1.392122e-03 | 4.564956e-01 | 9  |
| HTN | ENSG00000164938 | 8  | TP53INP1      | 1.600000e-03 | 8.169517e-17  | 3.148094e-03 | 4.539066e-01 | 20 |
| HTN | ENSG00000138036 | 2  | DYNC2LI1      | 2.000000e-03 | 2.921344e-10  | 5.488812e-03 | 4.440096e-01 | 10 |
| HTN | ENSG00000104325 | 8  | DECR1         | 5.000000e-04 | 1.035242e-49  | 6.967784e-04 | 4.388839e-01 | 3  |
| HTN | ENSG00000126215 | 14 | XRCC3         | 8.300036e-06 | 2.081461e-33  | 2.910892e-05 | 4.371467e-01 | 20 |
| HTN | ENSG00000175470 | 10 | PPP2R2D       | 2.000000e-03 | 6.725112e-21  | 3.313481e-03 | 4.365649e-01 | 12 |
| HTN | ENSG00000116273 | 1  | PHF13         | 4.700023e-04 | 6.847078e-29  | 8.391895e-04 | 4.360960e-01 | 20 |
| HTN | ENSG00000197548 | 3  | ATG7          | 1.899984e-03 | 1.296560e-12  | 4.507403e-03 | 4.229349e-01 | 7  |

|     |                 |              |              |              |              |              |    |
|-----|-----------------|--------------|--------------|--------------|--------------|--------------|----|
| HTN | ENSG00000172269 | 11 DPAGT1    | 1.299990e-03 | 5.723483e-10 | 4.209038e-03 | 4.200642e-01 | 10 |
| HTN | ENSG00000104497 | 8 SNX16      | 8.500021e-03 | 1.463810e-50 | 9.576851e-03 | 4.185568e-01 | 20 |
| HTN | ENSG00000077458 | 11 FAM76B    | 5.899973e-03 | 2.573455e-27 | 7.611721e-03 | 4.183706e-01 | 20 |
| HTN | ENSG00000198270 | 12 TMEM116   | 1.199997e-03 | 4.383078e-20 | 2.200845e-03 | 4.138927e-01 | 14 |
| HTN | ENSG00000126581 | 17 BECN1     | 2.100003e-03 | 7.331944e-17 | 3.937498e-03 | 4.058835e-01 | 4  |
| HTN | ENSG00000135114 | 12 OASL      | 3.799969e-03 | 6.789530e-19 | 5.936165e-03 | 4.055816e-01 | 20 |
| HTN | ENSG00000233006 | 5 AC034220.3 | 1.400006e-07 | 1.284508e-11 | 3.196351e-05 | 4.052090e-01 | 8  |
| HTN | ENSG00000130766 | 1 SESN2      | 5.600025e-03 | 1.684835e-20 | 7.955109e-03 | 3.988850e-01 | 20 |
| HTN | ENSG00000229515 | 3 FLT1P1     | 1.499996e-03 | 3.209579e-16 | 3.033055e-03 | 3.958458e-01 | 20 |
| HTN | ENSG00000169994 | 2 MYO7B      | 6.699926e-03 | 7.460372e-37 | 7.968929e-03 | 3.894307e-01 | 20 |
| HTN | ENSG00000197562 | 16 RAB40C    | 4.700023e-03 | 6.779167e-19 | 7.099366e-03 | 3.844637e-01 | 19 |
| HTN | ENSG00000128973 | 15 CLN6      | 1.799990e-03 | 4.038890e-41 | 2.333130e-03 | 3.838043e-01 | 20 |
| HTN | ENSG00000128944 | 15 KNSTRN    | 4.000000e-03 | 7.032152e-73 | 4.528593e-03 | 3.744574e-01 | 20 |
| HTN | ENSG00000242435 | 7 UPK3BP1    | 5.000000e-03 | 3.293470e-15 | 8.226372e-03 | 3.731737e-01 | 13 |
| HTN | ENSG00000253981 | 8 ALG1L13P   | 1.099993e-04 | 6.231092e-09 | 1.259773e-03 | 3.690775e-01 | 20 |
| HTN | ENSG00000118520 | 6 ARG1       | 4.700023e-03 | 8.145405e-71 | 5.288623e-03 | 3.636502e-01 | 20 |
| HTN | ENSG00000160208 | 21 RRP1B     | 8.600031e-08 | 1.332832e-08 | 9.740007e-05 | 3.582266e-01 | 7  |
| HTN | ENSG00000137825 | 15 ITPKA     | 1.000000e-03 | 1.071662e-09 | 3.872722e-03 | 3.562194e-01 | 8  |
| HTN | ENSG00000132881 | 1 RSG1       | 2.800013e-03 | 2.048843e-11 | 6.386141e-03 | 3.521575e-01 | 13 |
| HTN | ENSG00000114670 | 3 NEK11      | 4.399973e-03 | 3.340093e-16 | 7.134837e-03 | 3.509016e-01 | 18 |
| HTN | ENSG00000134697 | 1 GNL2       | 2.900013e-03 | 4.071848e-08 | 8.947397e-03 | 3.450891e-01 | 7  |
| HTN | ENSG00000229759 | 3 MRPS18AP1  | 1.700004e-05 | 1.118677e-32 | 5.180094e-05 | 3.378194e-01 | 20 |
| HTN | ENSG00000163875 | 1 MEAF6      | 1.199997e-03 | 1.528650e-33 | 1.698782e-03 | 3.370794e-01 | 13 |
| HTN | ENSG00000135250 | 7 SRPK2      | 9.400046e-04 | 1.984758e-25 | 1.610777e-03 | 3.340774e-01 | 20 |
| HTN | ENSG00000106460 | 7 TMEM106B   | 1.700004e-03 | 6.775056e-32 | 2.434663e-03 | 3.331718e-01 | 20 |
| HTN | ENSG00000115525 | 2 ST3GAL5    | 1.299990e-03 | 5.881480e-12 | 3.634982e-03 | 3.328264e-01 | 7  |
| HTN | ENSG00000164649 | 7 CDCA7L     | 3.299970e-03 | 1.691832e-78 | 3.715747e-03 | 3.327405e-01 | 20 |
| HTN | ENSG00000213347 | 5 MXD3       | 1.799990e-04 | 1.755246e-14 | 7.725013e-04 | 3.256976e-01 | 17 |
| HTN | ENSG00000132394 | 3 EEFSEC     | 2.699977e-03 | 3.319088e-14 | 5.259106e-03 | 3.232890e-01 | 20 |
| HTN | ENSG00000107099 | 9 DOCK8      | 6.100002e-03 | 4.329271e-25 | 7.997494e-03 | 3.228875e-01 | 9  |

|     |                 |               |              |               |              |              |    |
|-----|-----------------|---------------|--------------|---------------|--------------|--------------|----|
| HTN | ENSG00000164048 | 3 ZNF589      | 1.400006e-05 | 4.022437e-57  | 2.862571e-05 | 3.126335e-01 | 20 |
| HTN | ENSG00000118046 | 19 STK11      | 4.300015e-03 | 1.169242e-23  | 6.049325e-03 | 3.111462e-01 | 15 |
| HTN | ENSG00000204020 | 10 LIPN       | 9.099971e-03 | 3.789223e-130 | 9.457204e-03 | 3.036706e-01 | 20 |
| HTN | ENSG00000187446 | 15 CHP1       | 2.199986e-06 | 2.739411e-09  | 2.126556e-04 | 3.003783e-01 | 18 |
| HTN | ENSG00000169682 | 16 SPNS1      | 1.499996e-05 | 4.724044e-62  | 2.819771e-05 | 2.969624e-01 | 20 |
| HTN | ENSG00000177710 | 8 SLC35G5     | 5.899973e-05 | 5.670154e-15  | 3.544943e-04 | 2.932108e-01 | 20 |
| HTN | ENSG00000134222 | 1 PSRC1       | 1.499996e-03 | 2.328505e-18  | 2.918647e-03 | 2.931647e-01 | 11 |
| HTN | ENSG00000128928 | 15 IVD        | 4.799986e-03 | 6.557881e-26  | 6.428913e-03 | 2.930216e-01 | 20 |
| HTN | ENSG00000072778 | 17 ACADVL     | 1.600000e-06 | 2.222332e-28  | 1.079017e-05 | 2.915076e-01 | 20 |
| HTN | ENSG00000152219 | 11 ARL14EP    | 4.499974e-04 | 4.117926e-31  | 7.861205e-04 | 2.903419e-01 | 20 |
| HTN | ENSG00000170185 | 4 USP38       | 2.000000e-07 | 6.314544e-27  | 2.894966e-06 | 2.903364e-01 | 20 |
| HTN | ENSG00000165678 | 10 GHITM      | 6.299992e-03 | 1.004647e-22  | 8.525961e-03 | 2.831577e-01 | 12 |
| HTN | ENSG00000110218 | 11 PANX1      | 7.000032e-03 | 2.610154e-31  | 8.578608e-03 | 2.824396e-01 | 20 |
| HTN | ENSG00000099940 | 22 SNAP29     | 7.000032e-04 | 4.259234e-45  | 9.838860e-04 | 2.805671e-01 | 20 |
| HTN | ENSG00000157335 | 16 CLEC18C    | 1.499996e-04 | 2.433242e-71  | 2.093051e-04 | 2.797684e-01 | 20 |
| HTN | ENSG00000189050 | 17 RNFT1      | 3.299970e-03 | 9.599369e-09  | 8.894122e-03 | 2.788751e-01 | 7  |
| HTN | ENSG00000241350 | 7 PMS2P11     | 2.199986e-03 | 1.167979e-59  | 2.644719e-03 | 2.703836e-01 | 20 |
| HTN | ENSG00000089060 | 12 SLC8B1     | 4.600023e-04 | 4.793401e-10  | 2.262577e-03 | 2.567944e-01 | 8  |
| HTN | ENSG00000159202 | 17 UBE2Z      | 2.800013e-04 | 3.409896e-45  | 4.282945e-04 | 2.559577e-01 | 20 |
| HTN | ENSG00000099377 | 16 HSD3B7     | 4.200007e-06 | 2.086672e-15  | 6.860492e-05 | 2.492687e-01 | 13 |
| HTN | ENSG00000129007 | 15 CALML4     | 2.599980e-03 | 2.440509e-13  | 5.361232e-03 | 2.486060e-01 | 12 |
| HTN | ENSG00000099949 | 22 LZTR1      | 4.900044e-03 | 3.306234e-66  | 5.509126e-03 | 2.481564e-01 | 16 |
| HTN | ENSG00000163933 | 3 RFT1        | 5.699936e-04 | 1.199092e-10  | 2.394566e-03 | 2.443905e-01 | 6  |
| HTN | ENSG00000158517 | 7 NCF1        | 1.499996e-05 | 2.381417e-08  | 6.310419e-04 | 2.414962e-01 | 3  |
| HTN | ENSG00000114850 | 3 SSR3        | 2.199986e-04 | 3.066419e-09  | 1.705592e-03 | 2.406600e-01 | 12 |
| HTN | ENSG00000108262 | 17 GIT1       | 2.500000e-08 | 5.790310e-25  | 9.514330e-07 | 2.359132e-01 | 20 |
| HTN | ENSG00000165806 | 10 CASP7      | 3.200000e-03 | 5.301279e-50  | 3.871914e-03 | 2.319504e-01 | 20 |
| HTN | ENSG00000163956 | 4 LRPAP1      | 2.800013e-03 | 1.264813e-40  | 3.537573e-03 | 2.229606e-01 | 20 |
| HTN | ENSG00000170606 | 5 HSPA4       | 1.099993e-03 | 6.542009e-18  | 2.258597e-03 | 2.201700e-01 | 7  |
| HTN | ENSG00000231680 | 11 AP003774.6 | 1.299990e-03 | 1.427765e-35  | 1.786645e-03 | 2.126258e-01 | 20 |

|     |                 |    |               |              |               |              |              |    |
|-----|-----------------|----|---------------|--------------|---------------|--------------|--------------|----|
| HTN | ENSG00000099785 | 19 | 2-Mar         | 2.100003e-03 | 1.572091e-39  | 2.750458e-03 | 2.104973e-01 | 20 |
| HTN | ENSG00000146576 | 7  | C7orf26       | 1.099993e-03 | 8.565571e-20  | 2.143522e-03 | 2.100575e-01 | 20 |
| HTN | ENSG00000089169 | 12 | RPH3A         | 1.099993e-03 | 1.461064e-112 | 1.229069e-03 | 2.087622e-01 | 20 |
| HTN | ENSG00000196502 | 16 | SULT1A1       | 4.099964e-04 | 2.635881e-22  | 9.043348e-04 | 2.084994e-01 | 20 |
| HTN | ENSG00000167394 | 16 | ZNF668        | 1.400006e-05 | 2.137503e-21  | 7.687957e-05 | 2.021489e-01 | 20 |
| HTN | ENSG00000198026 | 20 | ZNF335        | 1.899984e-03 | 4.386446e-13  | 4.234932e-03 | 1.915555e-01 | 20 |
| HTN | ENSG00000197375 | 5  | SLC22A5       | 2.100003e-08 | 3.678602e-37  | 2.905371e-07 | 1.902020e-01 | 20 |
| HTN | ENSG00000171132 | 2  | PRKCE         | 4.499974e-06 | 1.545200e-08  | 3.660083e-04 | 1.861080e-01 | 6  |
| HTN | ENSG00000242612 | 16 | DECR2         | 1.899984e-03 | 6.059300e-28  | 2.769397e-03 | 1.783255e-01 | 20 |
| HTN | ENSG00000245680 | 19 | ZNF585B       | 3.599979e-03 | 2.343009e-08  | 9.891909e-03 | 1.767396e-01 | 18 |
| HTN | ENSG00000143549 | 1  | TPM3          | 4.399973e-03 | 4.266791e-14  | 7.642888e-03 | 1.705815e-01 | 20 |
| HTN | ENSG00000253982 | 8  | CTD-2336O2.1  | 1.199997e-03 | 7.156469e-30  | 1.890281e-03 | 1.703484e-01 | 20 |
| HTN | ENSG00000087274 | 4  | ADD1          | 1.000000e-03 | 5.059829e-12  | 3.011689e-03 | 1.696842e-01 | 12 |
| HTN | ENSG00000130479 | 19 | MAP1S         | 4.600023e-04 | 7.909072e-12  | 1.833321e-03 | 1.669084e-01 | 6  |
| HTN | ENSG00000100991 | 20 | TRPC4AP       | 7.499978e-03 | 6.697828e-25  | 9.601345e-03 | 1.642234e-01 | 20 |
| HTN | ENSG00000237886 | 9  | RP11-611D20.2 | 4.399973e-03 | 1.514880e-43  | 5.254872e-03 | 1.612823e-01 | 17 |
| HTN | ENSG00000198756 | 1  | COLGALT2      | 6.800017e-04 | 5.686644e-68  | 8.543709e-04 | 1.595650e-01 | 20 |
| HTN | ENSG00000141905 | 19 | NFIC          | 1.099993e-03 | 5.924845e-14  | 2.704856e-03 | 1.523805e-01 | 11 |
| HTN | ENSG00000060642 | 1  | PIGV          | 2.000000e-04 | 3.434974e-26  | 4.509314e-04 | 1.465846e-01 | 20 |
| HTN | ENSG00000232934 | 10 | RP11-324O2.3  | 4.499974e-03 | 4.525531e-27  | 6.070736e-03 | 1.460566e-01 | 20 |
| HTN | ENSG00000161618 | 19 | ALDH16A1      | 4.000000e-03 | 4.151776e-83  | 4.430819e-03 | 1.419699e-01 | 20 |
| HTN | ENSG00000198373 | 16 | WWP2          | 1.400006e-03 | 1.966110e-11  | 3.848009e-03 | 1.414012e-01 | 12 |
| HTN | ENSG00000102858 | 16 | MGRN1         | 2.000000e-03 | 1.738449e-76  | 2.304540e-03 | 1.392583e-01 | 20 |
| HTN | ENSG00000169230 | 5  | PRELID1       | 3.299970e-04 | 1.856860e-44  | 5.103636e-04 | 1.311331e-01 | 20 |
| HTN | ENSG00000163935 | 3  | SFMBT1        | 1.099993e-04 | 1.808688e-14  | 5.399787e-04 | 1.293834e-01 | 20 |
| HTN | ENSG00000142233 | 19 | NTN5          | 1.499996e-07 | 1.110479e-10  | 4.658716e-05 | 1.284163e-01 | 6  |
| HTN | ENSG00000100296 | 22 | THOC5         | 7.499978e-03 | 5.157231e-25  | 9.597092e-03 | 1.274868e-01 | 20 |
| HTN | ENSG00000173209 | 2  | AHSA2         | 1.499996e-03 | 2.038960e-78  | 1.735324e-03 | 1.268213e-01 | 20 |
| HTN | ENSG00000213445 | 11 | SIPA1         | 1.000000e-05 | 2.359846e-09  | 3.873465e-04 | 1.262794e-01 | 7  |
| HTN | ENSG00000177337 | 18 | DLGAP1-AS1    | 2.000000e-03 | 1.070509e-29  | 2.921000e-03 | 1.226502e-01 | 16 |

|     |                 |                  |              |              |              |              |    |
|-----|-----------------|------------------|--------------|--------------|--------------|--------------|----|
| HTN | ENSG00000173706 | 3 HEG1           | 2.800013e-03 | 5.720822e-13 | 5.813380e-03 | 1.214608e-01 | 13 |
| HTN | ENSG00000184110 | 16 EIF3C         | 1.299990e-03 | 6.027230e-09 | 4.810378e-03 | 1.204923e-01 | 14 |
| HTN | ENSG00000211678 | 22 IGLJ3         | 5.099998e-03 | 3.138398e-14 | 8.619907e-03 | 1.203622e-01 | 12 |
| HTN | ENSG00000226416 | 11 MRPL23-AS1    | 2.199986e-06 | 7.159711e-17 | 3.781495e-05 | 1.195340e-01 | 11 |
| HTN | ENSG00000170291 | 17 ELP5          | 8.300036e-06 | 1.866290e-23 | 4.724128e-05 | 1.181758e-01 | 20 |
| HTN | ENSG00000124207 | 20 CSE1L         | 4.099964e-05 | 6.786886e-10 | 6.392148e-04 | 1.164604e-01 | 9  |
| HTN | ENSG00000114520 | 3 SNX4           | 8.099906e-04 | 6.838228e-10 | 3.253818e-03 | 1.157323e-01 | 8  |
| HTN | ENSG00000127957 | 7 PMS2P3         | 8.900000e-04 | 2.638558e-22 | 1.658917e-03 | 1.065902e-01 | 13 |
| HTN | ENSG00000131067 | 20 GGT7          | 1.499996e-03 | 2.919427e-11 | 4.153307e-03 | 1.048210e-01 | 18 |
| HTN | ENSG00000218739 | 2 AC007390.5     | 3.599979e-06 | 3.715975e-21 | 3.215374e-05 | 1.044967e-01 | 20 |
| HTN | ENSG00000067533 | 1 RRP15          | 4.300015e-03 | 9.265494e-11 | 9.055078e-03 | 1.016391e-01 | 4  |
| HTN | ENSG00000249173 | 4 RP11-701P16.4  | 7.599937e-04 | 6.746404e-18 | 1.712115e-03 | 9.914470e-02 | 8  |
| HTN | ENSG00000233609 | 8 RP11-62H7.2    | 1.400006e-05 | 3.105938e-32 | 4.553298e-05 | 9.581736e-02 | 20 |
| HTN | ENSG00000182179 | 3 UBA7           | 1.899984e-05 | 1.781217e-61 | 3.540020e-05 | 9.574361e-02 | 20 |
| HTN | ENSG00000257017 | 16 HP            | 5.699936e-04 | 1.510386e-13 | 1.783675e-03 | 9.154262e-02 | 20 |
| HTN | ENSG00000228638 | 3 FCF1P2         | 1.700004e-04 | 1.525957e-22 | 4.501149e-04 | 8.623376e-02 | 20 |
| HTN | ENSG00000175193 | 3 PARL           | 4.700023e-04 | 1.050771e-34 | 7.639080e-04 | 8.364511e-02 | 20 |
| HTN | ENSG00000188603 | 16 CLN3          | 1.899984e-03 | 1.669228e-15 | 3.780159e-03 | 8.277284e-02 | 16 |
| HTN | ENSG00000146243 | 6 IRAK1BP1       | 2.500000e-03 | 1.444490e-14 | 4.881620e-03 | 7.840303e-02 | 20 |
| HTN | ENSG00000249572 | 5 CTD-2203K17.1  | 5.999983e-03 | 1.230804e-23 | 8.078927e-03 | 7.649568e-02 | 12 |
| HTN | ENSG00000153774 | 16 CFDP1         | 3.200000e-03 | 1.041082e-28 | 4.349498e-03 | 7.441597e-02 | 20 |
| HTN | ENSG00000108559 | 17 NUP88         | 4.200007e-03 | 1.314758e-11 | 8.365086e-03 | 7.430579e-02 | 14 |
| HTN | ENSG00000268081 | 19 RP11-678G14.2 | 1.299990e-03 | 9.217095e-35 | 1.832037e-03 | 7.334437e-02 | 20 |
| HTN | ENSG00000229453 | 3 SPINK8         | 1.400006e-04 | 5.862027e-15 | 6.100594e-04 | 7.270794e-02 | 15 |
| HTN | ENSG00000175826 | 17 CTDNEP1       | 4.900044e-06 | 4.251838e-25 | 2.911391e-05 | 7.062475e-02 | 20 |
| HTN | ENSG00000230069 | 4 LRRC37A15P     | 6.100002e-03 | 6.952534e-21 | 8.432667e-03 | 7.019743e-02 | 20 |
| HTN | ENSG00000113810 | 3 SMC4           | 1.099993e-03 | 8.452299e-09 | 4.597393e-03 | 6.979473e-02 | 7  |
| HTN | ENSG00000198837 | 1 DENND4B        | 4.099964e-03 | 7.794788e-22 | 5.911139e-03 | 6.958902e-02 | 10 |
| HTN | ENSG00000169592 | 16 INO80E        | 4.600023e-05 | 2.690099e-17 | 2.402432e-04 | 6.790582e-02 | 16 |
| HTN | ENSG00000033800 | 15 PIAS1         | 2.399993e-03 | 2.188468e-17 | 4.300294e-03 | 6.754985e-02 | 20 |

|                     |                  |              |               |              |              |    |
|---------------------|------------------|--------------|---------------|--------------|--------------|----|
| HTN ENSG00000158865 | 16 SLC5A11       | 1.400006e-05 | 1.390179e-104 | 1.987144e-05 | 6.647293e-02 | 20 |
| HTN ENSG00000167397 | 16 VKORC1        | 4.200007e-07 | 7.716004e-10  | 9.353322e-05 | 6.382336e-02 | 20 |
| HTN ENSG00000149084 | 11 HSD17B12      | 1.099993e-04 | 1.490246e-136 | 1.369200e-04 | 6.257548e-02 | 20 |
| HTN ENSG00000223496 | 16 EXOSC6        | 6.400000e-03 | 1.971035e-87  | 6.888282e-03 | 6.228612e-02 | 20 |
| HTN ENSG00000102882 | 16 MAPK3         | 4.900044e-03 | 4.368646e-53  | 5.599764e-03 | 6.087628e-02 | 20 |
| HTN ENSG00000261098 | 11 RP11-819C21.1 | 5.999983e-06 | 1.475422e-08  | 4.054215e-04 | 6.065650e-02 | 14 |
| HTN ENSG00000130475 | 19 FCHO1         | 4.499974e-03 | 1.750045e-43  | 5.420931e-03 | 6.007120e-02 | 20 |
| HTN ENSG00000167523 | 16 SPATA33       | 5.399953e-03 | 5.912893e-14  | 9.146081e-03 | 5.770674e-02 | 20 |
| HTN ENSG00000186792 | 3 HYAL3          | 7.599937e-03 | 3.051381e-56  | 8.492584e-03 | 5.760698e-02 | 20 |
| HTN ENSG00000141569 | 17 TRIM65        | 1.600000e-03 | 3.154466e-30  | 2.379239e-03 | 5.543923e-02 | 20 |
| HTN ENSG00000261556 | 16 RP11-296I10.6 | 6.400000e-03 | 1.150177e-54  | 7.215056e-03 | 5.510002e-02 | 20 |
| HTN ENSG00000111424 | 12 VDR           | 6.800017e-04 | 4.798333e-16  | 1.715278e-03 | 5.356671e-02 | 6  |
| HTN ENSG00000047849 | 3 MAP4           | 2.000000e-03 | 1.542218e-14  | 4.204405e-03 | 5.289011e-02 | 20 |
| HTN ENSG00000104626 | 8 ERI1           | 2.599980e-03 | 1.085084e-25  | 3.838429e-03 | 5.241534e-02 | 20 |
| HTN ENSG00000197536 | 5 C5orf56        | 1.099993e-03 | 5.328123e-16  | 2.521280e-03 | 5.129596e-02 | 20 |
| HTN ENSG00000168404 | 16 MLKL          | 1.199997e-03 | 2.512359e-15  | 2.764053e-03 | 5.115273e-02 | 7  |
| COPIENSG00000213593 | 11 TMX2          | 2.725400e-03 | 2.306139e-09  | 7.385600e-03 | 9.802675e-01 | 10 |
| COPIENSG00000160111 | 19 CPAMD8        | 7.024900e-03 | 5.628356e-31  | 8.655196e-03 | 9.713448e-01 | 7  |
| COPIENSG00000243176 | 3 RP11-550I24.2  | 8.603990e-05 | 2.207533e-19  | 3.189823e-04 | 9.606569e-01 | 19 |
| COPIENSG00000226259 | 5 GTF2H2B        | 2.038450e-03 | 5.231025e-57  | 2.460106e-03 | 9.600415e-01 | 17 |
| COPIENSG00000096996 | 19 IL12RB1       | 1.239770e-03 | 4.634410e-41  | 1.689891e-03 | 9.530951e-01 | 20 |
| COPIENSG00000261613 | 16 RP11-20I23.13 | 6.151910e-03 | 2.589742e-74  | 6.745165e-03 | 9.154116e-01 | 20 |
| COPIENSG00000260565 | 16 ERVK13-1      | 2.541970e-03 | 1.165310e-49  | 3.101047e-03 | 9.057595e-01 | 20 |
| COPIENSG00000244515 | 3 KRT18P34       | 1.613650e-04 | 9.198012e-10  | 1.317995e-03 | 8.886723e-01 | 8  |
| COPIENSG00000169203 | 16 RP11-231C14.4 | 6.601000e-04 | 1.034063e-13  | 1.958956e-03 | 8.875116e-01 | 12 |
| COPIENSG00000131507 | 5 NDFIP1         | 3.304610e-03 | 4.061387e-11  | 7.272310e-03 | 8.864523e-01 | 16 |
| COPIENSG00000153786 | 16 ZDHHC7        | 4.942200e-03 | 6.872571e-16  | 7.943179e-03 | 8.791625e-01 | 20 |
| COPIENSG00000204138 | 1 PHACTR4        | 6.875270e-04 | 1.025339e-32  | 1.096464e-03 | 8.760531e-01 | 20 |
| COPIENSG00000149131 | 11 SERPING1      | 6.766440e-04 | 4.004789e-08  | 3.852771e-03 | 8.738908e-01 | 7  |
| COPIENSG00000254634 | 16 RP11-231C14.3 | 6.774540e-04 | 4.872347e-09  | 3.294641e-03 | 8.692753e-01 | 6  |

|                     |                  |              |               |              |              |    |
|---------------------|------------------|--------------|---------------|--------------|--------------|----|
| COPIENSG00000163660 | 3 CCNL1          | 1.690050e-04 | 1.121278e-17  | 5.739889e-04 | 8.623977e-01 | 20 |
| COPIENSG00000166501 | 16 PRKCB         | 1.926900e-03 | 1.343533e-23  | 3.052374e-03 | 8.575436e-01 | 20 |
| COPIENSG00000106804 | 9 C5             | 1.095390e-03 | 6.879762e-17  | 2.361136e-03 | 8.569044e-01 | 20 |
| COPIENSG00000134996 | 9 OSTF1          | 3.800840e-03 | 1.360915e-22  | 5.515509e-03 | 8.471534e-01 | 20 |
| COPIENSG00000113758 | 5 DBN1           | 2.067430e-04 | 2.239267e-18  | 6.359034e-04 | 8.369132e-01 | 12 |
| COPIENSG00000080345 | 2 RIF1           | 2.051110e-03 | 6.049991e-10  | 5.790953e-03 | 8.338034e-01 | 6  |
| COPIENSG00000267795 | 16 SMIM22        | 5.257750e-03 | 4.381915e-31  | 6.661142e-03 | 8.292693e-01 | 20 |
| COPIENSG00000272950 | 7 RP11-307C18.1  | 3.186250e-03 | 2.356161e-43  | 3.925374e-03 | 8.141484e-01 | 20 |
| COPIENSG00000172878 | 2 METAP1D        | 3.384700e-03 | 2.998911e-11  | 7.331367e-03 | 8.026105e-01 | 9  |
| COPIENSG00000140623 | 16 SEPT12        | 5.257750e-03 | 1.083659e-30  | 6.681400e-03 | 8.015636e-01 | 20 |
| COPIENSG00000077585 | 1 GPR137B        | 5.143040e-03 | 4.588184e-21  | 7.316538e-03 | 7.997026e-01 | 13 |
| COPIENSG00000186152 | 19 LILRP1        | 5.975720e-03 | 2.063912e-30  | 7.510927e-03 | 7.977766e-01 | 13 |
| COPIENSG00000089876 | 10 DHX32         | 5.332000e-04 | 3.458518e-35  | 8.518212e-04 | 7.915997e-01 | 20 |
| COPIENSG00000196526 | 4 AFAP1          | 6.992620e-04 | 4.972368e-306 | 7.354526e-04 | 7.915074e-01 | 20 |
| COPIENSG00000206077 | 5 ZDHHC11B       | 3.774070e-03 | 6.149930e-12  | 7.601001e-03 | 7.888818e-01 | 3  |
| COPIENSG00000184110 | 16 EIF3C         | 1.272150e-03 | 6.027230e-09  | 4.824480e-03 | 7.857949e-01 | 15 |
| COPIENSG00000116883 | 1 RP11-268J15.5  | 7.172820e-03 | 2.008216e-27  | 9.060682e-03 | 7.684238e-01 | 18 |
| COPIENSG00000133275 | 19 CSNK1G2       | 2.142990e-04 | 5.575382e-15  | 8.224362e-04 | 7.653663e-01 | 14 |
| COPIENSG00000267077 | 16 RP11-127I20.5 | 7.043360e-03 | 1.726453e-33  | 8.540381e-03 | 7.633402e-01 | 20 |
| COPIENSG00000183458 | 16 RP11-958N24.1 | 4.270220e-03 | 5.488410e-11  | 8.804844e-03 | 7.409882e-01 | 15 |
| COPIENSG00000144136 | 2 SLC20A1        | 3.811800e-03 | 3.011723e-10  | 8.559426e-03 | 7.332337e-01 | 14 |
| COPIENSG00000246089 | 8 RP11-115C21.2  | 1.812470e-03 | 4.013782e-25  | 2.819640e-03 | 7.327740e-01 | 20 |
| COPIENSG00000119397 | 9 CNTRL          | 1.690640e-03 | 2.115581e-12  | 4.148794e-03 | 7.285716e-01 | 17 |
| COPIENSG00000226450 | 22 CYP2D8P1      | 6.032540e-03 | 3.276098e-15  | 9.512461e-03 | 7.256941e-01 | 20 |
| COPIENSG00000103269 | 16 RHBDL1        | 9.160100e-05 | 2.920524e-15  | 4.564612e-04 | 7.234083e-01 | 18 |
| COPIENSG00000076864 | 1 RAP1GAP        | 6.164250e-03 | 9.078676e-65  | 6.850709e-03 | 7.232028e-01 | 20 |
| COPIENSG00000198890 | 1 PRMT6          | 2.143780e-03 | 3.449739e-41  | 2.766753e-03 | 7.141327e-01 | 17 |
| COPIENSG00000095261 | 9 PSMD5          | 2.071190e-03 | 2.811046e-08  | 7.074800e-03 | 7.073312e-01 | 8  |
| COPIENSG00000113269 | 5 RNF130         | 5.287740e-03 | 3.384930e-28  | 6.859605e-03 | 7.049021e-01 | 7  |
| COPIENSG00000183604 | 16 RP11-347C12.2 | 6.554200e-04 | 2.316458e-23  | 1.263871e-03 | 7.031619e-01 | 20 |

|                     |                   |              |               |              |              |    |
|---------------------|-------------------|--------------|---------------|--------------|--------------|----|
| COPIENSG00000176125 | 7 UFSP1           | 4.842730e-03 | 1.927300e-16  | 7.691137e-03 | 6.918795e-01 | 20 |
| COPIENSG00000147324 | 8 MFHAS1          | 1.456330e-03 | 1.108237e-11  | 3.947135e-03 | 6.912065e-01 | 20 |
| COPIENSG00000183336 | 16 BOLA2          | 2.000230e-03 | 8.655712e-27  | 2.985806e-03 | 6.832111e-01 | 20 |
| COPIENSG00000213462 | 7 ERV3-1          | 2.457650e-03 | 5.521211e-46  | 3.054464e-03 | 6.797640e-01 | 20 |
| COPIENSG00000198064 | 16 RP11-347C12.1  | 2.751250e-03 | 5.445186e-09  | 7.726886e-03 | 6.796167e-01 | 5  |
| COPIENSG00000271780 | 14 RP11-1017G21.5 | 6.813500e-03 | 2.460822e-23  | 9.026661e-03 | 6.779318e-01 | 15 |
| COPIENSG00000112282 | 6 MED23           | 7.074570e-03 | 1.015000e-19  | 9.814723e-03 | 6.713071e-01 | 20 |
| COPIENSG00000241852 | 8 C8orf58         | 5.949220e-03 | 1.099110e-13  | 9.896809e-03 | 6.565663e-01 | 20 |
| COPIENSG00000137877 | 15 SPTBN5         | 1.077900e-03 | 8.067098e-56  | 1.369332e-03 | 6.557002e-01 | 20 |
| COPIENSG00000243156 | 22 MICAL3         | 9.675650e-04 | 1.216703e-10  | 3.319832e-03 | 6.542695e-01 | 20 |
| COPIENSG00000129355 | 19 CDKN2D         | 1.817190e-03 | 2.361771e-09  | 5.705515e-03 | 6.376992e-01 | 5  |
| COPIENSG00000137267 | 6 TUBB2A          | 9.624760e-05 | 1.709453e-143 | 1.156962e-04 | 6.373814e-01 | 20 |
| COPIENSG00000143740 | 1 SNAP47          | 8.312470e-06 | 6.565554e-09  | 4.086599e-04 | 6.241995e-01 | 7  |
| COPIENSG00000125447 | 17 GGA3           | 8.200120e-04 | 1.396315e-14  | 2.151138e-03 | 6.238024e-01 | 9  |
| COPIENSG00000146285 | 6 SCML4           | 4.641300e-03 | 1.288469e-32  | 5.887712e-03 | 6.204101e-01 | 20 |
| COPIENSG00000261349 | 1 RP3-465N24.5    | 4.754780e-03 | 1.823445e-113 | 5.086454e-03 | 6.092782e-01 | 20 |
| COPIENSG00000065029 | 6 ZNF76           | 5.014180e-03 | 1.341057e-22  | 6.989777e-03 | 6.087918e-01 | 20 |
| COPIENSG00000171792 | 12 RHNO1          | 5.022270e-03 | 3.432308e-27  | 6.617980e-03 | 6.007850e-01 | 20 |
| COPIENSG00000164039 | 4 BDH2            | 6.145260e-03 | 1.193008e-18  | 8.884430e-03 | 5.976190e-01 | 20 |
| COPIENSG00000166896 | 12 XRCC6BP1       | 8.688400e-03 | 2.465174e-104 | 9.185037e-03 | 5.804236e-01 | 20 |
| COPIENSG00000023892 | 6 DEF6            | 2.340020e-03 | 1.237275e-50  | 2.861289e-03 | 5.710396e-01 | 20 |
| COPIENSG00000111237 | 12 VPS29          | 2.646920e-03 | 6.445495e-15  | 5.036424e-03 | 5.651208e-01 | 11 |
| COPIENSG00000261783 | 16 RP11-252K23.2  | 3.837960e-03 | 8.525660e-26  | 5.312178e-03 | 5.634497e-01 | 20 |
| COPIENSG00000250138 | 5 RP11-848G14.5   | 4.156430e-03 | 5.838765e-21  | 6.120394e-03 | 5.517361e-01 | 6  |
| COPIENSG00000259940 | 16 CTD-3203P2.1   | 3.020860e-03 | 2.574405e-08  | 8.857690e-03 | 5.489396e-01 | 8  |
| COPIENSG00000167210 | 18 LOXHD1         | 8.448700e-03 | 1.961152e-51  | 9.476987e-03 | 5.283677e-01 | 10 |
| COPIENSG00000235750 | 1 KIAA0040        | 2.107710e-04 | 3.465920e-09  | 1.693594e-03 | 5.195811e-01 | 9  |
| COPIENSG00000172057 | 17 ORMDL3         | 2.165610e-04 | 4.006311e-56  | 3.166226e-04 | 5.184753e-01 | 20 |
| COPIENSG00000178809 | 7 TRIM73          | 1.201710e-03 | 1.870493e-10  | 3.889797e-03 | 5.093095e-01 | 3  |
| COPIENSG00000140395 | 15 WDR61          | 1.273500e-11 | 1.144011e-14  | 3.555377e-07 | 5.087066e-01 | 15 |

|                     |                  |              |               |              |              |    |
|---------------------|------------------|--------------|---------------|--------------|--------------|----|
| COPIENSG00000253816 | 5 RP11-1415C14.3 | 2.102760e-03 | 2.206111e-08  | 7.038011e-03 | 5.030497e-01 | 4  |
| COPIENSG00000119242 | 12 CCDC92        | 1.567330e-04 | 1.200562e-14  | 6.871473e-04 | 5.024205e-01 | 11 |
| COPIENSG00000104972 | 19 LILRB1        | 4.750840e-03 | 1.193088e-35  | 5.893138e-03 | 5.007120e-01 | 20 |
| COPIENSG00000187010 | 1 RHD            | 5.265990e-03 | 8.690250e-293 | 5.399164e-03 | 4.982341e-01 | 20 |
| COPIENSG00000160563 | 9 MED27          | 7.406790e-03 | 2.227005e-23  | 9.704960e-03 | 4.963247e-01 | 20 |
| COPIENSG00000254554 | 11 RP11-351I24.1 | 5.174280e-04 | 3.678269e-20  | 1.162651e-03 | 4.959180e-01 | 20 |
| COPIENSG00000099994 | 22 SUSD2         | 1.205400e-04 | 3.204980e-17  | 4.670826e-04 | 4.925164e-01 | 13 |
| COPIENSG00000230910 | 6 RP3-525N10.2   | 3.204870e-03 | 8.504365e-43  | 3.957011e-03 | 4.847773e-01 | 20 |
| COPIENSG00000234585 | 7 CCT6P3         | 2.457650e-03 | 3.118596e-100 | 2.715730e-03 | 4.776870e-01 | 20 |
| COPIENSG00000226002 | 7 RP11-460N20.5  | 2.831130e-03 | 5.320302e-98  | 3.118400e-03 | 4.756602e-01 | 20 |
| COPIENSG00000178952 | 16 TUFM          | 5.566860e-04 | 3.387607e-286 | 5.898144e-04 | 4.750088e-01 | 20 |
| COPIENSG00000168385 | 2 SEPT2          | 3.333420e-03 | 2.249848e-90  | 3.677676e-03 | 4.590536e-01 | 20 |
| COPIENSG00000082258 | 2 CCNT2          | 1.977290e-03 | 5.030508e-15  | 4.014710e-03 | 4.572022e-01 | 12 |
| COPIENSG00000179902 | 1 C1orf194       | 3.195580e-03 | 3.349465e-25  | 4.569560e-03 | 4.450094e-01 | 13 |
| COPIENSG00000087274 | 4 ADD1           | 1.121860e-07 | 5.059829e-12  | 2.588625e-05 | 4.366392e-01 | 13 |
| COPIENSG00000105339 | 8 DENND3         | 4.188030e-03 | 6.783045e-11  | 8.735390e-03 | 4.303932e-01 | 4  |
| COPIENSG00000170858 | 19 LILRP2        | 4.750840e-03 | 2.354530e-90  | 5.171484e-03 | 4.198391e-01 | 20 |
| COPIENSG00000126432 | 11 PRDX5         | 7.352410e-03 | 3.699254e-27  | 9.283797e-03 | 4.190844e-01 | 20 |
| COPIENSG00000178093 | 19 TSSK6         | 3.110860e-03 | 4.763569e-12  | 6.560771e-03 | 4.181105e-01 | 20 |
| COPIENSG00000133243 | 19 BTBD2         | 2.170850e-04 | 1.259791e-10  | 1.345621e-03 | 4.036117e-01 | 7  |
| COPIENSG00000214435 | 10 AS3MT         | 2.007100e-03 | 1.204173e-37  | 2.670907e-03 | 3.984825e-01 | 20 |
| COPIENSG00000153391 | 18 INO80C        | 7.482730e-04 | 1.389479e-16  | 1.798723e-03 | 3.890509e-01 | 13 |
| COPIENSG00000140941 | 16 MAP1LC3B      | 1.235580e-03 | 1.177878e-16  | 2.614003e-03 | 3.888619e-01 | 20 |
| COPIENSG00000198168 | 11 SVIP          | 4.536700e-03 | 2.974934e-11  | 9.047126e-03 | 3.799777e-01 | 6  |
| COPIENSG00000133706 | 5 LARS           | 3.178480e-03 | 2.537190e-20  | 4.952553e-03 | 3.785075e-01 | 15 |
| COPIENSG00000258429 | 16 PDF           | 1.763520e-06 | 7.831459e-11  | 1.176361e-04 | 3.587676e-01 | 13 |
| COPIENSG00000125445 | 17 MRPS7         | 5.591010e-04 | 2.369119e-51  | 7.690162e-04 | 3.577159e-01 | 20 |
| COPIENSG00000174529 | 1 TMEM81         | 5.048470e-03 | 1.191811e-12  | 9.100959e-03 | 3.519590e-01 | 20 |
| COPIENSG00000154127 | 11 UBASH3B       | 5.992940e-04 | 1.036618e-18  | 1.379632e-03 | 3.488866e-01 | 20 |
| COPIENSG00000041988 | 1 THAP3          | 4.926630e-03 | 1.396839e-12  | 8.962768e-03 | 3.488028e-01 | 16 |

|                     |                  |              |              |              |              |    |
|---------------------|------------------|--------------|--------------|--------------|--------------|----|
| COPIENSG00000136247 | 7 ZDHC4          | 2.404810e-03 | 1.839535e-47 | 2.973714e-03 | 3.440435e-01 | 20 |
| COPIENSG00000227373 | 1 RP11-160H22.5  | 4.227850e-03 | 1.192922e-11 | 8.396358e-03 | 3.436549e-01 | 6  |
| COPIENSG00000145736 | 5 GTF2H2         | 3.350190e-03 | 1.413800e-55 | 3.929735e-03 | 3.427660e-01 | 8  |
| COPIENSG00000166130 | 12 IKBIP         | 4.472700e-04 | 1.001375e-15 | 1.298427e-03 | 3.424810e-01 | 14 |
| COPIENSG00000117592 | 1 PRDX6          | 3.197350e-03 | 4.082654e-33 | 4.199106e-03 | 3.403783e-01 | 20 |
| COPIENSG00000224183 | 1 SDHDP6         | 5.265990e-03 | 6.486986e-86 | 5.735031e-03 | 3.391662e-01 | 20 |
| COPIENSG00000233232 | 16 NPIP7         | 1.541130e-03 | 9.931134e-25 | 2.476907e-03 | 3.306284e-01 | 20 |
| COPIENSG00000166263 | 17 STXP4         | 1.035740e-03 | 1.561914e-19 | 2.043306e-03 | 3.282966e-01 | 15 |
| COPIENSG00000166507 | 10 NDST2         | 4.259710e-03 | 2.177002e-16 | 6.945746e-03 | 3.275461e-01 | 17 |
| COPIENSG00000225611 | 3 RP11-70C1.1    | 4.267560e-03 | 3.954602e-20 | 6.356920e-03 | 3.145871e-01 | 10 |
| COPIENSG00000077782 | 8 FGFR1          | 7.280310e-03 | 1.746022e-46 | 8.344827e-03 | 3.126656e-01 | 16 |
| COPIENSG00000183726 | 1 TMEM50A        | 5.265990e-03 | 1.750457e-53 | 6.040779e-03 | 3.119736e-01 | 20 |
| COPIENSG00000172460 | 16 PRSS30P       | 2.695010e-03 | 3.689468e-40 | 3.426967e-03 | 3.028816e-01 | 20 |
| COPIENSG00000161653 | 17 NAGS          | 3.329890e-03 | 5.017393e-10 | 7.940187e-03 | 2.962983e-01 | 10 |
| COPIENSG00000165275 | 9 TRMT10B        | 3.926000e-03 | 5.148703e-27 | 5.339952e-03 | 2.953394e-01 | 20 |
| COPIENSG00000266970 | 17 RP11-806H10.4 | 1.310840e-04 | 1.566021e-10 | 1.027940e-03 | 2.828901e-01 | 20 |
| COPIENSG00000100417 | 22 PMM1          | 4.150880e-03 | 4.194480e-15 | 7.091063e-03 | 2.776247e-01 | 20 |
| COPIENSG00000262468 | 16 RP11-95P2.1   | 4.277300e-05 | 1.102452e-08 | 8.781602e-04 | 2.674274e-01 | 7  |
| COPIENSG00000119632 | 14 IFI27L2       | 4.940150e-03 | 1.015508e-37 | 6.035287e-03 | 2.647051e-01 | 13 |
| COPIENSG00000197375 | 5 SLC22A5        | 3.471520e-07 | 3.678602e-37 | 2.231229e-06 | 2.624515e-01 | 20 |
| COPIENSG00000140374 | 15 ETFA          | 6.985540e-03 | 3.562859e-34 | 8.443419e-03 | 2.488946e-01 | 20 |
| COPIENSG00000145868 | 5 FBXO38         | 3.970730e-03 | 6.001640e-29 | 5.284437e-03 | 2.450832e-01 | 17 |
| COPIENSG00000116032 | 19 GRIN3B        | 8.683600e-04 | 2.417162e-16 | 2.033479e-03 | 2.446738e-01 | 20 |
| COPIENSG00000224203 | 1 RPS23P10       | 6.238640e-04 | 5.078994e-32 | 1.018979e-03 | 2.413937e-01 | 20 |
| COPIENSG00000226029 | 1 RP4-798A10.2   | 6.272350e-03 | 2.926549e-25 | 8.213290e-03 | 2.378932e-01 | 20 |
| COPIENSG00000049449 | 11 RCN1          | 6.130130e-03 | 3.297564e-15 | 9.636915e-03 | 2.367085e-01 | 12 |
| COPIENSG00000145743 | 5 FBXL17         | 6.639260e-05 | 4.933431e-10 | 7.853110e-04 | 2.289893e-01 | 14 |
| COPIENSG00000113441 | 5 LNPEP          | 4.046130e-05 | 4.697216e-13 | 3.568707e-04 | 2.289095e-01 | 11 |
| COPIENSG00000273382 | 1 RP5-1065J22.8  | 1.757840e-03 | 4.467804e-15 | 3.664977e-03 | 2.266939e-01 | 9  |
| COPIENSG00000169684 | 15 CHRNA5        | 8.373360e-14 | 3.602823e-12 | 3.632298e-07 | 2.254649e-01 | 14 |

|                     |                  |              |               |              |              |    |
|---------------------|------------------|--------------|---------------|--------------|--------------|----|
| COPIENSG00000167074 | 22 TEF           | 3.267160e-04 | 6.789273e-35  | 5.616166e-04 | 2.248580e-01 | 20 |
| COPIENSG00000245954 | 4 RP11-18H21.1   | 1.024120e-03 | 4.395634e-112 | 1.156592e-03 | 2.162217e-01 | 20 |
| COPIENSG00000008838 | 17 MED24         | 3.455650e-05 | 2.315095e-21  | 1.473480e-04 | 2.158687e-01 | 20 |
| COPIENSG00000142552 | 19 RCN3          | 3.014600e-03 | 1.408453e-34  | 3.937611e-03 | 2.103693e-01 | 20 |
| COPIENSG00000204859 | 1 ZBTB48         | 1.365780e-04 | 1.804759e-15  | 5.832465e-04 | 1.998664e-01 | 12 |
| COPIENSG00000166147 | 15 FBN1          | 1.370280e-03 | 6.192685e-40  | 1.864290e-03 | 1.894928e-01 | 20 |
| COPIENSG00000102882 | 16 MAPK3         | 2.970570e-03 | 4.368646e-53  | 3.539346e-03 | 1.887664e-01 | 20 |
| COPIENSG00000187775 | 17 DNAH17        | 7.192670e-05 | 1.413545e-12  | 5.342543e-04 | 1.810220e-01 | 20 |
| COPIENSG00000127580 | 16 WDR24         | 2.888420e-03 | 1.979732e-30  | 3.931594e-03 | 1.765146e-01 | 20 |
| COPIENSG00000257176 | 12 RP11-996F15.2 | 5.194930e-03 | 2.964445e-73  | 5.744959e-03 | 1.736298e-01 | 20 |
| COPIENSG00000125388 | 4 GRK4           | 1.858230e-06 | 1.581272e-29  | 1.122139e-05 | 1.718879e-01 | 20 |
| COPIENSG00000267283 | 19 AC005306.3    | 2.142990e-04 | 1.019388e-12  | 1.019815e-03 | 1.694935e-01 | 14 |
| COPIENSG00000151164 | 12 RAD9B         | 3.212920e-03 | 2.146602e-18  | 5.230439e-03 | 1.666779e-01 | 20 |
| COPIENSG00000135972 | 2 MRPS9          | 5.035590e-05 | 3.185423e-24  | 1.665590e-04 | 1.655279e-01 | 20 |
| COPIENSG00000134864 | 13 GACT          | 2.683980e-03 | 3.743778e-39  | 3.435184e-03 | 1.607661e-01 | 3  |
| COPIENSG00000241945 | 21 PWP2          | 3.481770e-03 | 7.200620e-146 | 3.696369e-03 | 1.592608e-01 | 20 |
| COPIENSG00000160221 | 21 C21orf33      | 3.229760e-03 | 1.288995e-144 | 3.436949e-03 | 1.590696e-01 | 20 |
| COPIENSG00000152527 | 2 PLEKHH2        | 3.959680e-03 | 1.476253e-09  | 9.291106e-03 | 1.553262e-01 | 11 |
| COPIENSG00000168488 | 16 ATXN2L        | 1.261940e-03 | 1.414974e-12  | 3.338931e-03 | 1.540578e-01 | 18 |
| COPIENSG00000145734 | 5 BDP1           | 3.350190e-03 | 7.578276e-09  | 8.903197e-03 | 1.506992e-01 | 3  |
| COPIENSG00000224635 | 20 RP4-564F22.5  | 5.247350e-03 | 7.076636e-67  | 5.856634e-03 | 1.410455e-01 | 20 |
| COPIENSG00000103264 | 16 FBXO31        | 1.235580e-03 | 2.316710e-16  | 2.648003e-03 | 1.373066e-01 | 18 |
| COPIENSG00000226822 | 1 RP11-356N1.2   | 7.108370e-03 | 6.207815e-53  | 8.023438e-03 | 1.359745e-01 | 20 |
| COPIENSG00000107960 | 10 OBFC1         | 3.189330e-03 | 1.470249e-14  | 5.898160e-03 | 1.325032e-01 | 19 |
| COPIENSG00000230847 | 5 RP11-195E2.1   | 3.350190e-03 | 1.598248e-32  | 4.399352e-03 | 1.294550e-01 | 3  |
| COPIENSG00000259475 | 15 RP11-654A16.3 | 3.105490e-04 | 1.398949e-21  | 7.423118e-04 | 1.294452e-01 | 11 |
| COPIENSG00000075651 | 3 PLD1           | 2.470420e-03 | 6.432045e-09  | 7.275051e-03 | 1.285177e-01 | 9  |
| COPIENSG00000166275 | 10 C10orf32      | 4.612860e-03 | 1.176456e-22  | 6.501147e-03 | 1.254852e-01 | 20 |
| COPIENSG00000228409 | 7 CCT6P1         | 3.465850e-03 | 6.383020e-17  | 5.794122e-03 | 1.251504e-01 | 18 |
| COPIENSG00000167077 | 22 MEI1          | 1.888430e-03 | 3.486534e-55  | 2.305822e-03 | 1.207131e-01 | 20 |

|                     |                 |              |               |              |              |    |
|---------------------|-----------------|--------------|---------------|--------------|--------------|----|
| COPIENSG00000178425 | 6 NT5DC1        | 4.171670e-04 | 5.013093e-09  | 2.517034e-03 | 1.202288e-01 | 20 |
| COPIENSG00000164308 | 5 ERAP2         | 8.384940e-05 | 0.000000e+00  | 8.701764e-05 | 1.156462e-01 | 20 |
| COPIENSG00000255571 | 15 LINC00925    | 6.661930e-04 | 1.726415e-12  | 2.175616e-03 | 1.118458e-01 | 15 |
| COPIENSG00000253981 | 8 ALG1L13P      | 1.531370e-03 | 6.231092e-09  | 5.404151e-03 | 1.009754e-01 | 20 |
| COPIENSG00000234389 | 2 AC007278.3    | 6.869580e-03 | 9.514866e-107 | 7.300443e-03 | 9.790403e-02 | 20 |
| COPIENSG00000196236 | 22 XPNPEP3      | 9.166210e-04 | 2.753713e-20  | 1.809985e-03 | 9.617366e-02 | 20 |
| COPIENSG00000073605 | 17 GSDMB        | 2.165610e-04 | 6.031688e-82  | 2.813299e-04 | 9.616956e-02 | 20 |
| COPIENSG00000198198 | 1 SZT2          | 4.372800e-04 | 9.868162e-11  | 2.004761e-03 | 9.548117e-02 | 9  |
| COPIENSG00000171055 | 2 FEZ2          | 7.412250e-04 | 2.772872e-52  | 9.882368e-04 | 8.935653e-02 | 20 |
| COPIENSG00000205269 | 6 TMEM170B      | 6.145820e-03 | 7.142338e-28  | 7.863607e-03 | 8.818816e-02 | 20 |
| COPIENSG00000233006 | 5 AC034220.3    | 2.895080e-04 | 1.284508e-11  | 1.396284e-03 | 8.817202e-02 | 11 |
| COPIENSG00000188603 | 16 CLN3         | 3.944850e-03 | 1.669228e-15  | 6.719359e-03 | 8.100062e-02 | 17 |
| COPIENSG00000167645 | 19 YIF1B        | 2.684290e-03 | 1.051250e-30  | 3.675304e-03 | 8.017017e-02 | 20 |
| COPIENSG00000257218 | 12 GATC         | 6.435320e-03 | 1.956603e-18  | 9.274054e-03 | 7.701322e-02 | 19 |
| COPIENSG00000146373 | 6 RNF217        | 7.245860e-04 | 4.065077e-08  | 4.001773e-03 | 7.672913e-02 | 4  |
| COPIENSG00000157045 | 16 NTAN1        | 4.810610e-03 | 1.863269e-13  | 8.468662e-03 | 7.513829e-02 | 15 |
| COPIENSG00000176476 | 16 CCDC101      | 5.026200e-03 | 1.722082e-32  | 6.331319e-03 | 7.486312e-02 | 20 |
| COPIENSG00000233609 | 8 RP11-62H7.2   | 9.209370e-04 | 3.105938e-32  | 1.419732e-03 | 7.476797e-02 | 20 |
| COPIENSG00000134255 | 1 CEPT1         | 8.994980e-05 | 3.866760e-22  | 2.833362e-04 | 7.339054e-02 | 20 |
| COPIENSG00000215717 | 1 TMEM167B      | 1.757840e-03 | 2.292055e-36  | 2.396645e-03 | 7.240776e-02 | 20 |
| COPIENSG00000259514 | 15 RP11-685G9.2 | 2.786630e-03 | 1.357017e-10  | 6.712961e-03 | 6.867625e-02 | 6  |
| COPIENSG00000255310 | 8 AF131215.2    | 3.287300e-03 | 1.823350e-18  | 5.319172e-03 | 6.836634e-02 | 20 |
| COPIENSG00000103550 | 16 KNOP1        | 2.989920e-03 | 1.170137e-30  | 4.044268e-03 | 6.750568e-02 | 20 |
| COPIENSG00000196502 | 16 SULT1A1      | 2.436740e-03 | 2.635881e-22  | 3.809965e-03 | 6.262916e-02 | 20 |
| COPIENSG00000134809 | 11 TIMM10       | 2.973170e-03 | 9.272034e-24  | 4.390564e-03 | 5.798618e-02 | 20 |
| COPIENSG00000166170 | 14 BAG5         | 1.193220e-07 | 1.053511e-09  | 6.367446e-05 | 5.557145e-02 | 10 |
| COPIENSG00000130731 | 16 C16orf13     | 7.729480e-03 | 2.178328e-91  | 8.266714e-03 | 5.465012e-02 | 20 |
| COPIENSG00000088888 | 20 MAVS         | 9.107100e-04 | 3.745769e-14  | 2.382222e-03 | 5.258501e-02 | 20 |

**Table S9.Prioritized candidate genes with pleiotropic effects across COPD and cardiovascular diseases**

| SYMBOL     | P          | Trait_pair | Pbon          | sig.placo | eQTL_eQT.v8_Whole_Blood | SMR_Whole_Blood | SMR_eQTLGen | band     |
|------------|------------|------------|---------------|-----------|-------------------------|-----------------|-------------|----------|
| ABHD17C    | 5.2782e-07 | COPD-HTN   | 0.00972931    | 1         | 1                       | 1               | 0           | 0 q25.1  |
| ADD1       | 1.9819e-07 | COPD-HTN   | 0.00365324    | 1         | 1                       | 1               | 1           | 1 p16.3  |
| AF131215.5 | 1.8319e-06 | COPD-HTN   | 0.03376741    | 1         | 0                       | 0               | 0           | 0 NA     |
| AL049840.1 | 2.5183e-09 | COPD-HTN   | 4.64198239e-0 | 1         | 1                       | 1               | 0           | 0 NA     |
| APOPT1     | 2.3609e-09 | COPD-HTN   | 4.35184697e-0 | 1         | 0                       | 0               | 0           | 0 NA     |
| BAG5       | 1.445e-09  | COPD-HTN   | 2.6635685e-05 | 1         | 1                       | 1               | 0           | 0 q32.33 |
| BLK        | 8.1673e-07 | COPD-HTN   | 0.01505478    | 1         | 1                       | 1               | 1           | 1 p23.1  |
| C5orf56    | 3.386e-09  | COPD-HTN   | 6.2414138e-05 | 1         | 1                       | 1               | 1           | 0 NA     |
| C8orf12    | 6.2746e-09 | COPD-HTN   | 0.0001156597  | 1         | 0                       | 0               | 0           | 0 NA     |
| CLCN6      | 3.1641e-08 | COPD-HTN   | 0.00058324    | 1         | 1                       | 1               | 0           | 0 p36.22 |
| DEFB134    | 1.7815e-06 | COPD-HTN   | 0.03283839    | 1         | 0                       | 0               | 0           | 0 p23.1  |
| DVL2       | 2.093e-06  | COPD-HTN   | 0.03858027    | 1         | 0                       | 0               | 0           | 0 p13.1  |
| GRK4       | 1.2064e-06 | COPD-HTN   | 0.02223757    | 1         | 1                       | 1               | 1           | 1 p16.3  |
| KCNK3      | 1.3834e-06 | COPD-HTN   | 0.02550021    | 1         | 0                       | 0               | 0           | 0 p23.3  |
| KDM4B      | 1.6228e-10 | COPD-HTN   | 2.99130724e-0 | 1         | 1                       | 1               | 0           | 0 p13.3  |
| KLC1       | 1.7059e-07 | COPD-HTN   | 0.00314449    | 1         | 1                       | 1               | 0           | 1 q32.33 |
| MAML3      | 5.507e-07  | COPD-HTN   | 0.01015105    | 1         | 1                       | 1               | 0           | 0 q31.1  |
| MARK3      | 2.6178e-06 | COPD-HTN   | 0.04825391    | 1         | 1                       | 1               | 0           | 0 q32.32 |
| MFHAS1     | 4.6574e-07 | COPD-HTN   | 0.00858499    | 1         | 1                       | 1               | 0           | 0 p23.1  |
| MLLT10     | 8.8952e-08 | COPD-HTN   | 0.00163965    | 1         | 0                       | 0               | 0           | 0 p12.31 |
| MSRA       | 4.2683e-07 | COPD-HTN   | 0.00786776    | 1         | 1                       | 1               | 0           | 1 p23.1  |
| MST1       | 1.3125e-06 | COPD-HTN   | 0.02419331    | 1         | 0                       | 0               | 0           | 0 p21.31 |
| MTHFR      | 1.0144e-07 | COPD-HTN   | 0.00186984    | 1         | 1                       | 1               | 0           | 0 p36.22 |
| NOP14      | 1.9032e-06 | COPD-HTN   | 0.03508169    | 1         | 1                       | 1               | 0           | 0 p16.3  |
| P4HA2      | 3.222e-08  | COPD-HTN   | 0.00059391    | 1         | 1                       | 1               | 0           | 0 q31.1  |
| PDLIM4     | 2.8037e-08 | COPD-HTN   | 0.00051681    | 1         | 1                       | 1               | 0           | 0 q31.1  |
| PINX1      | 5.858e-07  | COPD-HTN   | 0.01079805    | 1         | 0                       | 0               | 0           | 0 p23.1  |
| PPP1R13B   | 7.7083e-07 | COPD-HTN   | 0.01420871    | 1         | 1                       | 1               | 0           | 0 q32.33 |

|                       |                     |               |   |   |   |   |          |
|-----------------------|---------------------|---------------|---|---|---|---|----------|
| RP11-73M182.7563e-07  | COPD-HTN            | 0.00508069    | 1 | 0 | 0 | 0 | 0 NA     |
| RP11-81K2.13.8572e-07 | COPD-HTN            | 0.00710998    | 1 | 1 | 1 | 0 | 0 NA     |
| RP1L1                 | 1.4333e-07 COPD-HTN | 0.002642      | 1 | 0 | 0 | 0 | 0 p23.1  |
| SLC22A4               | 2.3995e-09 COPD-HTN | 4.42299835e-C | 1 | 1 | 1 | 0 | 1 q31.1  |
| SLC22A5               | 9.5719e-10 COPD-HTN | 1.764388327e- | 1 | 1 | 1 | 1 | 1 q31.1  |
| SOX7                  | 9.2425e-08 COPD-HTN | 0.00170367    | 1 | 0 | 0 | 0 | 0 p23.1  |
| SOX7                  | 1.2864e-07 COPD-HTN | 0.00237122    | 1 | 1 | 1 | 0 | 1 p23.1  |
| TNKS                  | 2.1404e-06 COPD-HTN | 0.03945399    | 1 | 1 | 1 | 0 | 0 p23.1  |
| TRMT61A               | 1.3176e-06 COPD-HTN | 0.02428732    | 1 | 1 | 1 | 0 | 0 q32.33 |
| WNT2B                 | 1.0906e-07 COPD-HTN | 0.0020103     | 1 | 0 | 0 | 0 | 0 p13.2  |
| WNT3A                 | 1.8181e-06 COPD-HTN | 0.03351304    | 1 | 0 | 0 | 0 | 0 q42.13 |
| XKR6                  | 5.0901e-10 COPD-HTN | 9.38258133e-C | 1 | 1 | 1 | 0 | 0 p23.1  |
| XRCC3                 | 2.5895e-10 COPD-HTN | 4.77322535e-C | 1 | 1 | 1 | 1 | 0 q32.33 |
| ZFYVE21               | 2.6904e-08 COPD-HTN | 0.00049592    | 1 | 1 | 1 | 0 | 0 q32.33 |
| ZNF652                | 3.2437e-09 COPD-HTN | 5.97911221e-C | 1 | 1 | 1 | 0 | 0 q21.33 |
| ABHD17C               | 5.2782e-07 COPD-HF  | 0.00972931    | 0 | 1 | 1 | 0 | 0 q25.1  |
| ADD1                  | 1.9819e-07 COPD-HF  | 0.00365324    | 0 | 1 | 1 | 0 | 0 p16.3  |
| AF131215.5            | 1.8319e-06 COPD-HF  | 0.03376741    | 0 | 0 | 0 | 0 | 0 NA     |
| AL049840.1            | 2.5183e-09 COPD-HF  | 4.64198239e-C | 0 | 1 | 1 | 0 | 1 NA     |
| APOPT1                | 2.3609e-09 COPD-HF  | 4.35184697e-C | 0 | 0 | 0 | 0 | 0 NA     |
| BAG5                  | 1.445e-09 COPD-HF   | 2.6635685e-05 | 0 | 1 | 1 | 0 | 0 q32.33 |
| BLK                   | 8.1673e-07 COPD-HF  | 0.01505478    | 0 | 1 | 1 | 0 | 0 p23.1  |
| C5orf56               | 3.386e-09 COPD-HF   | 6.2414138e-05 | 0 | 1 | 1 | 0 | 0 NA     |
| C8orf12               | 6.2746e-09 COPD-HF  | 0.0001156597  | 0 | 0 | 0 | 0 | 0 NA     |
| CLCN6                 | 3.1641e-08 COPD-HF  | 0.00058324    | 0 | 1 | 1 | 0 | 0 p36.22 |
| DEFB134               | 1.7815e-06 COPD-HF  | 0.03283839    | 0 | 0 | 0 | 0 | 0 p23.1  |
| DVL2                  | 2.093e-06 COPD-HF   | 0.03858027    | 0 | 0 | 0 | 0 | 0 p13.1  |
| GRK4                  | 1.2064e-06 COPD-HF  | 0.02223757    | 0 | 1 | 1 | 0 | 0 p16.3  |
| KCNK3                 | 1.3834e-06 COPD-HF  | 0.02550021    | 0 | 0 | 0 | 0 | 0 p23.3  |
| KDM4B                 | 1.6228e-10 COPD-HF  | 2.99130724e-C | 0 | 1 | 1 | 0 | 0 p13.3  |

|              |            |          |               |   |   |   |   |          |
|--------------|------------|----------|---------------|---|---|---|---|----------|
| KLC1         | 1.7059e-07 | COPD-HF  | 0.00314449    | 0 | 1 | 1 | 0 | 0 q32.33 |
| MAML3        | 5.507e-07  | COPD-HF  | 0.01015105    | 0 | 1 | 1 | 0 | 0 q31.1  |
| MARK3        | 2.6178e-06 | COPD-HF  | 0.04825391    | 0 | 1 | 1 | 1 | 1 q32.32 |
| MFHAS1       | 4.6574e-07 | COPD-HF  | 0.00858499    | 0 | 1 | 1 | 0 | 0 p23.1  |
| MLLT10       | 8.8952e-08 | COPD-HF  | 0.00163965    | 0 | 0 | 0 | 0 | 0 p12.31 |
| MSRA         | 4.2683e-07 | COPD-HF  | 0.00786776    | 0 | 1 | 1 | 0 | 0 p23.1  |
| MST1         | 1.3125e-06 | COPD-HF  | 0.02419331    | 0 | 0 | 0 | 0 | 0 p21.31 |
| MTHFR        | 1.0144e-07 | COPD-HF  | 0.00186984    | 0 | 1 | 1 | 0 | 0 p36.22 |
| NOP14        | 1.9032e-06 | COPD-HF  | 0.03508169    | 0 | 1 | 1 | 0 | 0 p16.3  |
| P4HA2        | 3.222e-08  | COPD-HF  | 0.00059391    | 0 | 1 | 1 | 0 | 1 q31.1  |
| PDLIM4       | 2.8037e-08 | COPD-HF  | 0.00051681    | 0 | 1 | 1 | 0 | 0 q31.1  |
| PINX1        | 5.858e-07  | COPD-HF  | 0.01079805    | 0 | 0 | 0 | 0 | 0 p23.1  |
| PPP1R13B     | 7.7083e-07 | COPD-HF  | 0.01420871    | 0 | 1 | 1 | 0 | 0 q32.33 |
| RP11-73M18   | 2.7563e-07 | COPD-HF  | 0.00508069    | 0 | 0 | 0 | 0 | 0 NA     |
| RP11-81K2.13 | 8572e-07   | COPD-HF  | 0.00710998    | 0 | 1 | 1 | 0 | 0 NA     |
| RP1L1        | 1.4333e-07 | COPD-HF  | 0.002642      | 0 | 0 | 0 | 0 | 0 p23.1  |
| SLC22A4      | 2.3995e-09 | COPD-HF  | 4.42299835e-C | 0 | 1 | 1 | 0 | 0 q31.1  |
| SLC22A5      | 9.5719e-10 | COPD-HF  | 1.764388327e- | 0 | 1 | 1 | 1 | 1 q31.1  |
| SOX7         | 9.2425e-08 | COPD-HF  | 0.00170367    | 0 | 0 | 0 | 0 | 0 p23.1  |
| SOX7         | 1.2864e-07 | COPD-HF  | 0.00237122    | 0 | 1 | 1 | 0 | 0 p23.1  |
| TNKS         | 2.1404e-06 | COPD-HF  | 0.03945399    | 0 | 1 | 1 | 0 | 0 p23.1  |
| TRMT61A      | 1.3176e-06 | COPD-HF  | 0.02428732    | 0 | 1 | 1 | 1 | 0 q32.33 |
| WNT2B        | 1.0906e-07 | COPD-HF  | 0.0020103     | 0 | 0 | 0 | 0 | 0 p13.2  |
| WNT3A        | 1.8181e-06 | COPD-HF  | 0.03351304    | 0 | 0 | 0 | 0 | 0 q42.13 |
| XKR6         | 5.0901e-10 | COPD-HF  | 9.38258133e-C | 0 | 1 | 1 | 0 | 0 p23.1  |
| XRCC3        | 2.5895e-10 | COPD-HF  | 4.77322535e-C | 0 | 1 | 1 | 0 | 0 q32.33 |
| ZFYVE21      | 2.6904e-08 | COPD-HF  | 0.00049592    | 0 | 1 | 1 | 0 | 1 q32.33 |
| ZNF652       | 3.2437e-09 | COPD-HF  | 5.97911221e-C | 0 | 1 | 1 | 0 | 0 q21.33 |
| APOC1        | 2.2231e-06 | COPD-CHD | 0.04110734    | 1 | 0 | 0 | 0 | 0 q13.32 |
| APOE         | 6.985e-09  | COPD-CHD | 0.00012916    | 1 | 0 | 0 | 0 | 0 q13.32 |

|            |            |          |               |   |   |   |   |          |
|------------|------------|----------|---------------|---|---|---|---|----------|
| BMP1       | 2.3328e-07 | COPD-CHD | 0.00431358    | 1 | 0 | 0 | 0 | 0 p21.3  |
| CHRNA4     | 2.5133e-06 | COPD-CHD | 0.04647343    | 1 | 0 | 0 | 0 | 0 q13.33 |
| CHRNA4     | 4.4206e-08 | COPD-CHD | 0.00081741    | 1 | 0 | 0 | 0 | 0 q25.1  |
| CIRH1A     | 1.3979e-06 | COPD-CHD | 0.02584857    | 1 | 0 | 0 | 0 | 0 NA     |
| IREB2      | 5.9374e-09 | COPD-CHD | 0.0001097884  | 1 | 1 | 1 | 0 | 0 q25.1  |
| MORF4L1    | 9.3726e-10 | COPD-CHD | 1.733087466e- | 1 | 0 | 0 | 0 | 0 q25.1  |
| RP11-343C2 | 8.4901e-07 | COPD-CHD | 0.01569904    | 1 | 0 | 0 | 0 | 0 NA     |
| SNTB2      | 1.5852e-06 | COPD-CHD | 0.02931193    | 1 | 0 | 0 | 1 | 1 q22.1  |
| TOMM40     | 1.0888e-06 | COPD-CHD | 0.020133      | 1 | 0 | 0 | 0 | 0 q13.32 |
| VPS4A      | 1.5684e-06 | COPD-CHD | 0.02900128    | 1 | 0 | 0 | 0 | 1 q22.1  |
| ZNF652     | 4.3905e-08 | COPD-CHD | 0.00081185    | 1 | 1 | 1 | 0 | 0 q21.33 |

---
